# Supplementary material for: Quantitative Proteomics Analysis of Altered Protein Expression in the Placental Villous Tissue of Early Pregnancy Loss Using Isobaric Tandem Mass Tags
Source: Biomed Res Int. 2014 Mar 13;2014:647143. doi: 10.1155/2014/647143 (PMC3971554; doi:10.1155/2014/647143)
Supplement: Supplementary file 1 — Supplemental Docx1 provided the materials and methods such as reagents, western blot analysis and immunohistochemistry. Supplemental Data 1 gave the identified proteins information. Supplemental Data 2 gave the identified peptide information. Supplemental Data 3 listed the human placental villous tissue proteins that were differentially abundant between the two groups identified in Human placental villous (≧1.2-fold). Supplemental Graph 1 showed the GO analysis in both the molecular function and biological process of the differentially expressed proteins. [file 647143.f1.zip]

Archive with 5 entries (4 files):
- Supplementray Materials/
- Supplementray Materials/Supplemental Data 1.xlsx
- Supplementray Materials/Supplemental Data 2.xlsx
- Supplementray Materials/Supplemental Data 3.xlsx
- Supplementray Materials/Supplemental1.docx.docx
