# Supplementary material for: Quantitative Proteomics Analysis of Altered Protein Expression in the Placental Villous Tissue of Early Pregnancy Loss Using Isobaric Tandem Mass Tags
Source: Biomed Res Int. 2014 Mar 13;2014:647143. doi: 10.1155/2014/647143 (PMC3971554; doi:10.1155/2014/647143)
Supplement: Supplementary file 1 — Supplemental Docx1 provided the materials and methods such as reagents, western blot analysis and immunohistochemistry. Supplemental Data 1 gave the identified proteins information. Supplemental Data 2 gave the identified peptide information. Supplemental Data 3 listed the human placental villous tissue proteins that were differentially abundant between the two groups identified in Human placental villous (≧1.2-fold). Supplemental Graph 1 showed the GO analysis in both the molecular function and biological process of the differentially expressed proteins. [file 647143.f1.zip › Supplementray Materials/Supplemental Data 1.xlsx]

## Sheet: Sheet1
Supplemental Data 1. Credible proteins identified in Human placental villous with FDR of 1%
ID	Peptide IDs	Protein	RefSeq Protein ID	Ensembl Gene ID	Associated Gene Name	Associated Gene Name{Description}	Peptides	Unique Peptides	Peptides group1	Peptides group2	Unique Peptides group1	Unique Peptides group2	Sequence Coverage [%]	Unique + Razor Sequence Coverage [%]	Unique Sequence Coverage [%]	Mol. Weight [kDa]	Sequence Length	Experiment group1	Experiment group2	PEP	Sequence Coverage group1 [%]	Sequence Coverage group2 [%]
21	13233	IPI00000001	NP_004593;NP_059346;NP_059347;NP_059348;NP_001032405	ENSG00000124214	STAU1	STAU1{staufen, RNA binding protein, homolog 1 (Drosophila) [Source:HGNC Symbol,Acc:11370]}	1	1	1	1	1	1	2.3	2.3	2.3	63.182	577	2	4	0.0050508	2.3	2.3
22	14160	IPI00000005	NP_002515;NP_001123914;NP_005334	ENSG00000213281;ENSG00000174775	NRAS;HRAS	NRAS{neuroblastoma RAS viral (v-ras) oncogene homolog [Source:HGNC Symbol,Acc:7989]};HRAS{v-Ha-ras Harvey rat sarcoma viral oncogene homolog [Source:HGNC Symbol,Acc:5173]}	1	1	1	1	1	1	6.3	6.3	6.3	21.229	189	2	3	6.4478e-07	6.3	6.3
23	8965;9509;13963;15707	IPI00000015	NP_005617	ENSG00000116350	SRSF4	SRSF4{serine/arginine-rich splicing factor 4 [Source:HGNC Symbol,Acc:10786]}	4	1	4	4	1	1	7.3	7.3	1.6	56.678	494	6	26	1.4535e-30	7.3	7.3
24	16623;17979	IPI00000030	NP_006236;NP_851307;NP_851308	ENSG00000112640	PPP2R5D	PPP2R5D{protein phosphatase 2, regulatory subunit B', delta [Source:HGNC Symbol,Acc:9312]}	2	1	2	1	1	0	3.7	1.8	1.8	69.991	602	3		3.5711e-07	3.7	1.8
25	6878	IPI00299169	NP_859070	ENSG00000162542	TMCO4	TMCO4{transmembrane and coiled-coil domains 4 [Source:HGNC Symbol,Acc:27393]}	1	1	1	1	1	1	1.4	1.4	1.4	67.909	634	2	2	0.0048614	1.4	1.4
26	19559	IPI00000104	NP_003791	ENSG00000111880	RNGTT	RNGTT{RNA guanylyltransferase and 5'-phosphatase [Source:HGNC Symbol,Acc:10073]}	1	1	1	1	1	1	1.3	1.3	1.3	68.556	597	2	2	0.0016053	1.3	1.3
28	19569	IPI00000115	NP_054903	ENSG00000143771	CNIH4	CNIH4{cornichon homolog 4 (Drosophila) [Source:HGNC Symbol,Acc:25013]}	1	1	1	1	1	1	14.4	14.4	14.4	16.093	139	2	2	5.0732e-73	14.4	14.4
31	5426	IPI00101258	NP_114403	ENSG00000062582	MRPS24	MRPS24{mitochondrial ribosomal protein S24 [Source:HGNC Symbol,Acc:14510]}	1	1	1	1	1	1	11.4	11.4	11.4	19.015	167	2	1	0.0043494	11.4	11.4
32	8713;10166;10710	IPI00000425	NP_036595	ENSG00000185344	ATP6V0A2	ATP6V0A2{ATPase, H+ transporting, lysosomal V0 subunit a2 [Source:HGNC Symbol,Acc:18481]}	3	1	3	3	1	1	3.2	1.2	1.2	98.081	856	1	1	3.3023e-08	3.2	3.2
36	5879	IPI00000656	NP_056144	ENSG00000129933	MAU2	MAU2{MAU2 chromatid cohesion factor homolog (C. elegans) [Source:HGNC Symbol,Acc:29140]}	1	1	1	1	1	1	1.5	1.5	1.5	69.081	613	5	4	0.0016802	1.5	1.5
40	13212	IPI00000761	NP_079537	ENSG00000204421;ENSG00000206398;ENSG00000228250;ENSG00000228859;ENSG00000235452;ENSG00000235925;ENSG00000236183	LY6G6C	LY6G6C{lymphocyte antigen 6 complex, locus G6C [Source:HGNC Symbol,Acc:13936]}	1	1	1	1	1	1	6.4	6.4	6.4	13.821	125	4	5	0.004183	6.4	6.4
43	14535	IPI00000811	NP_002789	ENSG00000142507	PSMB6	PSMB6{proteasome (prosome, macropain) subunit, beta type, 6 [Source:HGNC Symbol,Acc:9543]}	1	1	1	1	1	1	4.2	4.2	4.2	25.357	239	2	6	0.0015104	4.2	4.2
55	2057;2351;4408;13842;17502	IPI00000889	NP_000506;NP_072053;NP_072054;NP_072055	ENSG00000204414	GH1	GH1{growth hormone 1 [Source:HGNC Symbol,Acc:4261]}	5	1	4	5	1	1	20.3	6	6	24.847	217	1	1	1.5213e-94	20.3	20.3
59	8768	IPI00001145	NP_001121598	ENSG00000100478	AP4S1	AP4S1{adaptor-related protein complex 4, sigma 1 subunit [Source:HGNC Symbol,Acc:575]}	1	1	1	0	1	0	6.9	6.9	6.9	17.005	144	3		0.001521	6.9	0
61	15391	IPI00001434	NP_061757	ENSG00000120327	PCDHB14	PCDHB14{protocadherin beta 14 [Source:HGNC Symbol,Acc:8685]}	1	1	0	1	0	1	1.1	1.1	1.1	87.547	798		5	7.991e-05	0	1.1
63	19471	IPI00657861	NP_001189450;NP_054700;NP_054699;NP_001189452;NP_001945	ENSG00000137332;ENSG00000204580;ENSG00000215522;ENSG00000230456;ENSG00000234078	DDR1	DDR1{discoidin domain receptor tyrosine kinase 1 [Source:HGNC Symbol,Acc:2730]}	1	1	1	1	1	1	1.1	1.1	1.1	101.8	919	3	5	2.5883e-28	1.1	1.1
70	15911	IPI00001663	NP_037379;NP_659540	ENSG00000115317	HTRA2	HTRA2{HtrA serine peptidase 2 [Source:HGNC Symbol,Acc:14348]}	1	1	0	1	0	1	2.6	2.6	2.6	48.84	458		4	0.0033881	0	2.6
74	1769	IPI00001734	NP_478059;NP_066977	ENSG00000135069	PSAT1	PSAT1{phosphoserine aminotransferase 1 [Source:HGNC Symbol,Acc:19129]}	1	1	1	1	1	1	2.2	2.2	2.2	45.355	415	1	2	9.1808e-08	2.2	2.2
77	7465	IPI00001849	NP_065945	ENSG00000163945	KIAA1530	KIAA1530{KIAA1530 [Source:HGNC Symbol,Acc:29304]}	1	1	1	1	1	1	1.3	1.3	1.3	80.591	709	2	1	0.00011358	1.3	1.3
91	9380	IPI00220152	NP_057651;NP_510868;NP_510869	ENSG00000107949	BCCIP	BCCIP{BRCA2 and CDKN1A interacting protein [Source:HGNC Symbol,Acc:978]}	1	1	1	1	1	1	2.5	2.5	2.5	36.214	322	10	18	5.8871e-05	2.5	2.5
93	11369	IPI00002398	NP_001161771;NP_001161775;NP_277030;NP_001161772;NP_001161773;NP_001161774;NP_061335	ENSG00000003096;ENSG00000198642	KLHL13;KLHL9	KLHL13{kelch-like 13 (Drosophila) [Source:HGNC Symbol,Acc:22931]};KLHL9{kelch-like 9 (Drosophila) [Source:HGNC Symbol,Acc:18732]}	1	1	1	1	1	1	1.5	1.5	1.5	74.629	658	2	2	0.00047474	1.5	1.5
98	3735	IPI00002349	NP_065823	ENSG00000108256	NUFIP2	NUFIP2{nuclear fragile X mental retardation protein interacting protein 2 [Source:HGNC Symbol,Acc:17634]}	1	1	0	1	0	1	1.4	1.4	1.4	76.12	695		4	0.0013758	0	1.4
105	13767	IPI00002483	NP_067017	ENSG00000170385	SLC30A1	SLC30A1{solute carrier family 30 (zinc transporter), member 1 [Source:HGNC Symbol,Acc:11012]}	1	1	1	1	1	1	3.9	3.9	3.9	55.299	507	1	1	1.1585e-15	3.9	3.9
116	7990	IPI00219794	NP_005489	ENSG00000129354	AP1M2	AP1M2{adaptor-related protein complex 1, mu 2 subunit [Source:HGNC Symbol,Acc:558]}	1	1	1	1	1	1	2.6	2.6	2.6	48.209	425	10	10	2.9691e-07	2.6	2.6
120	18706	IPI00641770	NP_001185704;NP_002642;NP_001185702;NP_001185703	ENSG00000143393	PI4KB	PI4KB{phosphatidylinositol 4-kinase, catalytic, beta [Source:HGNC Symbol,Acc:8984]}	1	1	1	1	1	1	1.7	1.7	1.7	92.723	828	1	1	2.4195e-06	1.7	1.7
128	9925	IPI00745161	NP_001192244;NP_078912;NP_001192245	ENSG00000127954	STEAP4	STEAP4{STEAP family member 4 [Source:HGNC Symbol,Acc:21923]}	1	1	0	1	0	1	5	5	5	51.981	459		1	2.8613e-24	0	5
134	7165	IPI00003102	NP_001833;NP_671693	ENSG00000122756	CNTFR	CNTFR{ciliary neurotrophic factor receptor [Source:HGNC Symbol,Acc:2170]}	1	1	1	1	1	1	3.5	3.5	3.5	40.633	372	1	2	0.0011353	3.5	3.5
138	2248;7116;7760;8769;8770;16173;17268	IPI00003269	NP_001017992	ENSG00000169067	ACTBL2	ACTBL2{actin, beta-like 2 [Source:HGNC Symbol,Acc:17780]}	7	1	7	7	1	1	17.8	4.8	4.8	42.003	376	9	5	5.1844e-136	17.8	17.8
141	9166	IPI00003327	NP_004302	ENSG00000138175	ARL3	ARL3{ADP-ribosylation factor-like 3 [Source:HGNC Symbol,Acc:694]}	1	1	0	1	0	1	6	6	6	20.455	182		6	0.0047576	0	6
144	7802	IPI00003373	NP_001192183;NP_001192184;NP_002529	ENSG00000197822;ENSG00000256194;ENSG00000256057	OCLN;AC142525.2;AC138827.1	OCLN{occludin [Source:HGNC Symbol,Acc:8104]};AC142525.2{occludin pseudogene (LOC647859), non-coding RNA [Source:RefSeq DNA,Acc:NR_026578]};AC138827.1{OCLN [Source:UniProtKB/TrEMBL,Acc:D2DU65]}	1	1	1	1	1	1	4.6	4.6	4.6	59.143	522	1	1	0.0027281	4.6	4.6
146	10200	IPI00872805	NP_001138371;NP_066978;NP_055072;NP_001138369;NP_001138368;NP_001138377;NP_001138381;NP_001138382;NP_001138366;NP_001138376;NP_001138379;NP_001138383;NP_001138367;NP_001138365	ENSG00000090659;ENSG00000104938	CD209;CLEC4M	CD209{CD209 molecule [Source:HGNC Symbol,Acc:1641]};CLEC4M{C-type lectin domain family 4, member M [Source:HGNC Symbol,Acc:13523]}	1	1	1	1	1	1	2.5	2.5	2.5	45.774	404	1	1	0.0024709	2.5	2.5
148	16065	IPI00003446	NP_065434;NP_001158163;NP_001158162	ENSG00000135409	AMHR2	AMHR2{anti-Mullerian hormone receptor, type II [Source:HGNC Symbol,Acc:465]}	1	1	0	1	0	1	1.6	1.6	1.6	62.749	573		5	0.0021713	0	1.6
173	3780	IPI00306380	NP_055181;NP_996561;NP_996562	ENSG00000163938	GNL3	GNL3{guanine nucleotide binding protein-like 3 (nucleolar) [Source:HGNC Symbol,Acc:29931]}	1	1	1	0	1	0	2	2	2	61.992	549	2		0.00041746	2	0
176	5260;8290	IPI00003921	NP_001159477;NP_976218;NP_001159478	ENSG00000159023	EPB41	EPB41{erythrocyte membrane protein band 4.1 (elliptocytosis 1, RH-linked) [Source:HGNC Symbol,Acc:3377]}	2	1	1	2	1	1	2.5	0.8	0.8	97.016	864	1	1	3.4041e-06	0.8	2.5
188	16608	IPI00908913	NP_001008712;NP_001008711;NP_001008710;NP_006858	ENSG00000157110	RBPMS	RBPMS{RNA binding protein with multiple splicing [Source:HGNC Symbol,Acc:19097]}	1	1	1	1	1	1	6.2	6.2	6.2	24.997	224	1	1	2.0169e-10	6.2	6.2
192	8888	IPI00004324	NP_055223	ENSG00000054116	TRAPPC3	TRAPPC3{trafficking protein particle complex 3 [Source:HGNC Symbol,Acc:19942]}	1	1	1	1	1	1	4.4	4.4	4.4	20.274	180	3	3	0.00027791	4.4	4.4
201	8099;18892	IPI00550611	NP_001008707;NP_004425	ENSG00000066629	EML1	EML1{echinoderm microtubule associated protein like 1 [Source:HGNC Symbol,Acc:3330]}	2	1	1	2	0	1	2	1.1	1.1	91.984	834		1	0.00010606	1	2
217	9350	IPI00005050	NP_071383	ENSG00000120333	MRPS14	MRPS14{mitochondrial ribosomal protein S14 [Source:HGNC Symbol,Acc:14049]}	1	1	1	0	1	0	11.7	11.7	11.7	15.139	128	2		9.5279e-05	11.7	0
218	10112	IPI00221393	NP_536856	ENSG00000070214	SLC44A1	SLC44A1{solute carrier family 44, member 1 [Source:HGNC Symbol,Acc:18798]}	1	1	1	1	1	1	2.1	2.1	2.1	73.301	657	7	7	6.3476e-07	2.1	2.1
220	10362	IPI00037599	NP_001166923;NP_005644;NP_055368;NP_001166924	ENSG00000135457;ENSG00000115112	TFCP2;TFCP2L1	TFCP2{transcription factor CP2 [Source:HGNC Symbol,Acc:11748]};TFCP2L1{transcription factor CP2-like 1 [Source:HGNC Symbol,Acc:17925]}	1	1	1	1	1	1	2.6	2.6	2.6	57.255	502	3	1	0.0031283	2.6	2.6
221	13202	IPI00914975	NP_055369	ENSG00000079387	SENP1	SENP1{SUMO1/sentrin specific peptidase 1 [Source:HGNC Symbol,Acc:17927]}	1	1	1	0	1	0	1.2	1.2	1.2	73.48	644	3		0.0056535	1.2	0
233	16531	IPI00005260	NP_055429	ENSG00000068878	PSME4	PSME4{proteasome (prosome, macropain) activator subunit 4 [Source:HGNC Symbol,Acc:20635]}	1	1	1	1	1	1	0.5	0.5	0.5	211.33	1843	2	3	0.00075502	0.5	0.5
234	2013;7317	IPI00005270	NP_076994	ENSG00000134901	KDELC1	KDELC1{KDEL (Lys-Asp-Glu-Leu) containing 1 [Source:HGNC Symbol,Acc:19350]}	2	1	1	2	0	1	3.6	2.4	2.4	58.042	502		3	0.00070012	1.2	3.6
237	6859	IPI00005511	NP_116147	ENSG00000100410	PHF5A	PHF5A{PHD finger protein 5A [Source:HGNC Symbol,Acc:18000]}	1	1	0	1	0	1	8.2	8.2	8.2	12.405	110		2	0.0059514	0	8.2
238	482	IPI00005547	NP_055400	ENSG00000138449	SLC40A1	SLC40A1{solute carrier family 40 (iron-regulated transporter), member 1 [Source:HGNC Symbol,Acc:10909]}	1	1	0	1	0	1	1.9	1.9	1.9	62.541	571		4	0.00050673	0	1.9
241	8142;9162;17694;18744;19536	IPI00005578	NP_644670	ENSG00000103966	EHD4	EHD4{EH-domain containing 4 [Source:HGNC Symbol,Acc:3245]}	5	1	4	5	1	1	9.6	2	2	61.174	541	2	2	7.4485e-17	7.8	9.6
242	19337	IPI00005605	NP_114402;NP_071922	ENSG00000101079	NDRG3	NDRG3{NDRG family member 3 [Source:HGNC Symbol,Acc:14462]}	1	1	1	1	1	1	4.3	4.3	4.3	41.408	375	2	3	1.4348e-07	4.3	4.3
243	5676	IPI00457142	NP_001020375;NP_006749;NP_001020374	ENSG00000160201	U2AF1	U2AF1{U2 small nuclear RNA auxiliary factor 1 [Source:HGNC Symbol,Acc:12453]}	1	1	1	1	1	1	5.8	5.8	5.8	27.34	243	11	11	8.4662e-07	5.8	5.8
257	10001	IPI00005904	NP_009135	ENSG00000064703	DDX20	DDX20{DEAD (Asp-Glu-Ala-Asp) box polypeptide 20 [Source:HGNC Symbol,Acc:2743]}	1	1	1	1	1	1	1.8	1.8	1.8	92.239	824	2	2	3.7499e-06	1.8	1.8
264	3385;3634;5806;19662	IPI00006025	NP_055521	ENSG00000075856	SART3	SART3{squamous cell carcinoma antigen recognized by T cells 3 [Source:HGNC Symbol,Acc:16860]}	4	1	3	4	1	1	4	3.4	1.6	109.93	963	5	4	7.8748e-18	3.4	4
265	6519	IPI00921911	NP_001303	ENSG00000182809	CRIP2	CRIP2{cysteine-rich protein 2 [Source:HGNC Symbol,Acc:2361]}	1	1	0	1	0	1	6.7	6.7	6.7	30.506	284		2	5.992e-29	0	6.7
267	4091;6061;8524;11142;11302;12793;19219	IPI00006050	NP_001193867;NP_001193870;NP_055534	ENSG00000198420	FAM115A	FAM115A{family with sequence similarity 115, member A [Source:HGNC Symbol,Acc:22201]}	7	1	6	6	1	1	8.1	8.1	1	102.12	921	32	31	5.6957e-52	7.3	6.9
268	8959	IPI00006052	NP_036526	ENSG00000143256	PFDN2	PFDN2{prefoldin subunit 2 [Source:HGNC Symbol,Acc:8867]}	1	1	1	1	1	1	7.8	7.8	7.8	16.648	154	2	7	1.817e-12	7.8	7.8
271	11240	IPI00026104	NP_000193;NP_001160022;NP_006114	ENSG00000010404	IDS	IDS{iduronate 2-sulfatase [Source:HGNC Symbol,Acc:5389]}	1	1	1	1	1	1	1.6	1.6	1.6	61.872	550	3	3	0.0016802	1.6	1.6
272	9862	IPI00011264	NP_002104;NP_005657	ENSG00000244414;ENSG00000080910	CFHR1;CFHR2	CFHR1{complement factor H-related 1 [Source:HGNC Symbol,Acc:4888]};CFHR2{complement factor H-related 2 [Source:HGNC Symbol,Acc:4890]}	1	1	0	1	0	1	3.3	3.3	3.3	37.65	330		1	8.7012e-05	0	3.3
273	4287	IPI00006164	NP_110395	ENSG00000132323	ILKAP	ILKAP{integrin-linked kinase-associated serine/threonine phosphatase [Source:HGNC Symbol,Acc:15566]}	1	1	1	1	1	1	3.1	3.1	3.1	42.906	392	1	2	0.00036521	3.1	3.1
277	4612	IPI00217965	NP_003874	ENSG00000171720	HDAC3	HDAC3{histone deacetylase 3 [Source:HGNC Symbol,Acc:4854]}	1	1	1	1	1	1	2.8	2.8	2.8	49.111	429	1	1	0.0014755	2.8	2.8
284	2872	IPI00006408	NP_057037	ENSG00000142546	NOSIP	NOSIP{nitric oxide synthase interacting protein [Source:HGNC Symbol,Acc:17946]}	1	1	1	1	1	1	3.7	3.7	3.7	33.172	301	3	3	0.0039333	3.7	3.7
285	12182;13090	IPI00006437					2	1	1	2	0	1	35.6	16.4	16.4	8.2324	73		7	1.0449e-54	19.2	35.6
292	3396;13100;18162	IPI00006574	NP_110424	ENSG00000197872;ENSG00000153310	FAM49A;FAM49B	FAM49A{family with sequence similarity 49, member A [Source:HGNC Symbol,Acc:25373]};FAM49B{family with sequence similarity 49, member B [Source:HGNC Symbol,Acc:25216]}	3	1	2	3	1	1	13.6	6.8	6.8	37.312	323	2	3	2.6952e-156	10.8	13.6
294	2633	IPI00006586	NP_055643	ENSG00000092203	TOX4	TOX4{TOX high mobility group box family member 4 [Source:HGNC Symbol,Acc:20161]}	1	1	1	1	1	1	1.6	1.6	1.6	66.194	621	3	3	0.0013152	1.6	1.6
296	1707;4799;13737	IPI00006612	NP_055656	ENSG00000065609	SNAP91	SNAP91{synaptosomal-associated protein, 91kDa homolog (mouse) [Source:HGNC Symbol,Acc:14986]}	3	1	3	3	1	1	3.1	0.9	0.9	92.501	907	3	2	9.965e-09	3.1	3.1
297	5352	IPI00455329	NP_001123554;NP_002664	ENSG00000164050	PLXNB1	PLXNB1{plexin B1 [Source:HGNC Symbol,Acc:9103]}	1	1	1	1	1	1	0.5	0.5	0.5	232.3	2135	3	3	0.00091854	0.5	0.5
298	12290	IPI00465119		ENSG00000152061	RABGAP1L	RABGAP1L{RAB GTPase activating protein 1-like [Source:HGNC Symbol,Acc:24663]}	1	1	0	1	0	1	2.6	2.6	2.6	43.888	378		6	0.0044557	0	2.6
299	1999	IPI00006657	NP_055679	ENSG00000116199	FAM20B	FAM20B{family with sequence similarity 20, member B [Source:HGNC Symbol,Acc:23017]}	1	1	1	0	1	0	3.4	3.4	3.4	46.432	409	1		0.0021219	3.4	0
300	4588	IPI00006658	NP_006214	ENSG00000102309	PIN4	PIN4{protein (peptidylprolyl cis/trans isomerase) NIMA-interacting, 4 (parvulin) [Source:HGNC Symbol,Acc:8992]}	1	1	1	1	1	1	7.1	7.1	7.1	16.608	156	5	3	0.00055332	7.1	7.1
301	13489;19153	IPI00924574	NP_001638	ENSG00000189058	APOD	APOD{apolipoprotein D [Source:HGNC Symbol,Acc:612]}	2	1	2	2	1	1	7.9	7.9	5.1	24.158	215	5	6	9.0874e-07	7.9	7.9
310	708;5803	IPI00604647	NP_663719;NP_663720;NP_004825	ENSG00000071054	MAP4K4	MAP4K4{mitogen-activated protein kinase kinase kinase kinase 4 [Source:HGNC Symbol,Acc:6866]}	2	1	1	2	1	1	1.5	1.5	1	151	1320	4	10	1.4541e-23	1	1.5
313	6225	IPI00006937	NP_057105	ENSG00000241519	UBE2J1	UBE2J1{ubiquitin-conjugating enzyme E2, J1 (UBC6 homolog, yeast) [Source:HGNC Symbol,Acc:17598]}	1	1	1	1	1	1	4.7	4.7	4.7	35.198	318	1	1	7.3214e-17	4.7	4.7
329	4922;11495;12642;19652;19895	IPI00007144	NP_057177	ENSG00000037241	RPL26L1	RPL26L1{ribosomal protein L26-like 1 [Source:HGNC Symbol,Acc:17050]}	5	1	4	5	1	1	23.4	5.5	5.5	17.256	145	1	1	7.9566e-10	17.2	23.4
330	3518	IPI00328913	NP_898880;NP_057292	ENSG00000160948;ENSG00000256887	AC233992.9;VPS28	AC233992.9{vacuolar protein sorting-associated protein 28 homolog isoform 1 [Source:RefSeq peptide,Acc:NP_057292]};VPS28{vacuolar protein sorting 28 homolog (S. cerevisiae) [Source:HGNC Symbol,Acc:18178]}	1	1	1	1	1	1	3.4	3.4	3.4	26.462	233	1	1	0.00086045	3.4	3.4
331	3961	REV__IPI00167663	NP_057283	ENSG00000130332	LSM7	LSM7{LSM7 homolog, U6 small nuclear RNA associated (S. cerevisiae) [Source:HGNC Symbol,Acc:20470]}	1	1	1	1	1	1	2.1	2.1	2.1	43.808	374	1	2	0.0046468	2.1	2.1
332	13449	IPI00007166	NP_057181	ENSG00000134049	IER3IP1	IER3IP1{immediate early response 3 interacting protein 1 [Source:HGNC Symbol,Acc:18550]}	1	1	0	1	0	1	24.4	24.4	24.4	8.9687	82		4	1.0037e-21	0	24.4
333	15571	IPI00007174	NP_057184;NP_852668	ENSG00000173418	NAA20	NAA20{N(alpha)-acetyltransferase 20, NatB catalytic subunit [Source:HGNC Symbol,Acc:15908]}	1	1	1	1	1	1	8.4	8.4	8.4	20.368	178	1	1	0.0013115	8.4	8.4
334	13553	IPI00169267	NP_001129145;NP_071769	ENSG00000119787	ATL2	ATL2{atlastin GTPase 2 [Source:HGNC Symbol,Acc:24047]}	1	1	1	0	1	0	2.6	2.6	2.6	66.228	583	3		0.00026262	2.6	0
341	563	IPI00007266	NP_000679;NP_954635	ENSG00000023330	ALAS1	ALAS1{aminolevulinate, delta-, synthase 1 [Source:HGNC Symbol,Acc:396]}	1	1	1	1	1	1	2.6	2.6	2.6	72.623	657	1	1	1.8123e-05	2.6	2.6
348	7265;8826	IPI00007346	NP_006338	ENSG00000171960	PPIH	PPIH{peptidylprolyl isomerase H (cyclophilin H) [Source:HGNC Symbol,Acc:14651]}	2	1	2	2	1	1	8.5	5.1	5.1	19.208	177	4	2	2.8102e-05	8.5	8.5
349	8133	IPI00377050	NP_001154992;NP_006339;NP_859422	ENSG00000164597	COG5	COG5{component of oligomeric golgi complex 5 [Source:HGNC Symbol,Acc:14857]}	1	1	1	1	1	1	1.6	1.6	1.6	94.9	860	4	7	3.3068e-07	1.6	1.6
351	18975	IPI00007404	NP_006386;NP_001129503;NP_001138384	ENSG00000197548	ATG7	ATG7{ATG7 autophagy related 7 homolog (S. cerevisiae) [Source:HGNC Symbol,Acc:16935]}	1	1	1	1	1	1	1.4	1.4	1.4	77.959	703	1	4	0.0015151	1.4	1.4
354	11234	IPI00007427	NP_006399	ENSG00000106541	AGR2	AGR2{anterior gradient homolog 2 (Xenopus laevis) [Source:HGNC Symbol,Acc:328]}	1	1	1	0	1	0	8.7	8.7	8.7	22.237	195	2		8.0336e-39	8.7	0
355	11069	IPI00007611	NP_001688	ENSG00000241837	ATP5O	ATP5O{ATP synthase, H+ transporting, mitochondrial F1 complex, O subunit [Source:HGNC Symbol,Acc:850]}	1	1	1	1	1	1	6.6	6.6	6.6	23.277	213	3	4	8.384e-23	6.6	6.6
360	9156	IPI01013834	NP_057231	ENSG00000214517	PPME1	PPME1{protein phosphatase methylesterase 1 [Source:HGNC Symbol,Acc:30178]}	1	1	1	1	1	1	2.2	2.2	2.2	43.87	400	3	6	2.3813e-08	2.2	2.2
363	906;1466;3613;4096;4946;5212;5795;7635;8607;9800;9948;10373;10446;10832;11900;13091;13716;15379;16269;19612	IPI00007752	NP_006079;NP_817124	ENSG00000188229;ENSG00000183311;ENSG00000224156;ENSG00000227739;ENSG00000229684;ENSG00000232421;ENSG00000232575;ENSG00000235067;ENSG00000173876	TUBB2C;TUBB;RP11-631M21.2	TUBB2C{tubulin, beta 2C [Source:HGNC Symbol,Acc:20771]};TUBB{tubulin, beta [Source:HGNC Symbol,Acc:20778]};RP11-631M21.2{Tubulin beta-8 chain [Source:UniProtKB/Swiss-Prot,Acc:Q3ZCM7]}	20	1	20	19	1	1	63.1	19.3	2.7	49.83	445	16	51	0	63.1	59.3
369	6136	IPI00007853	NP_006323	ENSG00000216490	IFI30	IFI30{interferon, gamma-inducible protein 30 [Source:HGNC Symbol,Acc:5398]}	1	1	1	1	1	1	4.4	4.4	4.4	27.963	250	10	19	1.1161e-50	4.4	4.4
370	19451	IPI00007866	NP_071894	ENSG00000124839	RAB17	RAB17{RAB17, member RAS oncogene family [Source:HGNC Symbol,Acc:16523]}	1	1	1	0	1	0	4.7	4.7	4.7	23.491	212	1		0.0028311	4.7	0
371	12929	IPI00007913	NP_055886;NP_001129080	ENSG00000145819	ARHGAP26	ARHGAP26{Rho GTPase activating protein 26 [Source:HGNC Symbol,Acc:17073]}	1	1	1	1	1	1	1.6	1.6	1.6	92.234	814	7	8	2.0772e-36	1.6	1.6
379	18795	IPI00656136	YP_003024027	ENSG00000198763	MT-ND2	MT-ND2{mitochondrially encoded NADH dehydrogenase 2 [Source:HGNC Symbol,Acc:7456]}	1	1	1	1	1	1	2.6	2.6	2.6	39.533	350	3	3	6.5265e-06	2.6	2.6
385	12204	IPI00008214	NP_001001503	ENSG00000160194	NDUFV3	NDUFV3{NADH dehydrogenase (ubiquinone) flavoprotein 3, 10kDa [Source:HGNC Symbol,Acc:7719]}	1	1	1	1	1	1	14.8	14.8	14.8	11.94	108	1	6	7.1281e-57	14.8	14.8
389	1682	IPI00328868	NP_071905	ENSG00000118960	HS1BP3	HS1BP3{HCLS1 binding protein 3 [Source:HGNC Symbol,Acc:24979]}	1	1	1	1	1	1	4.3	4.3	4.3	42.78	392	1	1	2.375e-19	4.3	4.3
391	19820	IPI00008333	NP_057351	ENSG00000102243	VGLL1	VGLL1{vestigial like 1 (Drosophila) [Source:HGNC Symbol,Acc:20985]}	1	1	1	1	1	1	5.4	5.4	5.4	28.707	258	4	2	8.7811e-11	5.4	5.4
392	9941	IPI00008351	NP_057359	ENSG00000198843	RP11-392O18.1	RP11-392O18.1{Selenoprotein T [Source:UniProtKB/Swiss-Prot,Acc:P62341]}	1	1	1	1	1	1	6.2	6.2	6.2	22.277	195	2	3	0.0015557	6.2	6.2
395	17646	IPI00008422	NP_001121901;NP_001121902;NP_064544	ENSG00000163104	SMARCAD1	SMARCAD1{SWI/SNF-related, matrix-associated actin-dependent regulator of chromatin, subfamily a, containing DEAD/H box 1 [Source:HGNC Symbol,Acc:18398]}	1	1	1	1	1	1	1.1	1.1	1.1	117.6	1028	3	3	0.0001405	1.1	1.1
410	17221	IPI00008569	NP_006546	ENSG00000106636	YKT6	YKT6{YKT6 v-SNARE homolog (S. cerevisiae) [Source:HGNC Symbol,Acc:16959]}	1	1	1	1	1	1	4	4	4	22.417	198	1	5	0.0028298	4	4
412	13455	IPI00008579	NP_006558	ENSG00000145982	FARS2	FARS2{phenylalanyl-tRNA synthetase 2, mitochondrial [Source:HGNC Symbol,Acc:21062]}	1	1	1	1	1	1	3.1	3.1	3.1	52.356	451	4	2	2.05e-16	3.1	3.1
413	450;1426;1427;2248;2287;2561;3597;5959;6668;7116;7760;8769;8770;11181;11526;14079;16173;16984;17270;19740	IPI00008603	NP_001135417;NP_001604;NP_001606;NP_001186822	ENSG00000107796;ENSG00000163017;ENSG00000159251;ENSG00000143632	ACTA2;ACTG2;ACTC1;ACTA1	ACTA2{actin, alpha 2, smooth muscle, aorta [Source:HGNC Symbol,Acc:130]};ACTG2{actin, gamma 2, smooth muscle, enteric [Source:HGNC Symbol,Acc:145]};ACTC1{actin, alpha, cardiac muscle 1 [Source:HGNC Symbol,Acc:143]};ACTA1{actin, alpha 1, skeletal muscle [Source:HGNC Symbol,Acc:129]}	20	1	20	20	1	1	57.8	2.9	2.9	42.009	377	83	57	0	57.8	57.8
435	14448	IPI00946150	NP_009038	ENSG00000114850	SSR3	SSR3{signal sequence receptor, gamma (translocon-associated protein gamma) [Source:HGNC Symbol,Acc:11325]}	1	1	1	1	1	1	7.1	7.1	7.1	22.61	198	3	16	7.3851e-76	7.1	7.1
440	12374	IPI00009303	NP_000440;NP_001020774	ENSG00000143390	RFX5	RFX5{regulatory factor X, 5 (influences HLA class II expression) [Source:HGNC Symbol,Acc:9986]}	1	1	0	1	0	1	2.3	2.3	2.3	65.322	616		3	0.0018703	0	2.3
450	17702;18710	IPI00009355	NP_073587	ENSG00000059378	PARP12	PARP12{poly (ADP-ribose) polymerase family, member 12 [Source:HGNC Symbol,Acc:21919]}	2	1	2	2	1	1	2.1	1	1	79.063	701	2	2	1.3874e-05	2.1	2.1
452	4650	IPI00009407	NP_001335	ENSG00000129562	DAD1	DAD1{defender against cell death 1 [Source:HGNC Symbol,Acc:2664]}	1	1	1	1	1	1	10.6	10.6	10.6	12.497	113	2	15	1.264e-09	10.6	10.6
456	19138	IPI00009471	NP_006775	ENSG00000065183	WDR3	WDR3{WD repeat domain 3 [Source:HGNC Symbol,Acc:12755]}	1	1	1	1	1	1	1.2	1.2	1.2	106.1	943	1	2	0.0017465	1.2	1.2
457	10675	IPI00009480	NP_006701;NP_937832	ENSG00000198612	COPS8	COPS8{COP9 constitutive photomorphogenic homolog subunit 8 (Arabidopsis) [Source:HGNC Symbol,Acc:24335]}	1	1	1	1	1	1	4.8	4.8	4.8	23.225	209	1	6	0.00048685	4.8	4.8
458	487	IPI00009505	NP_006741	ENSG00000168807	SNTB2	SNTB2{syntrophin, beta 2 (dystrophin-associated protein A1, 59kDa, basic component 2) [Source:HGNC Symbol,Acc:11169]}	1	1	1	1	1	1	1.7	1.7	1.7	57.949	540	6	4	0.0034332	1.7	1.7
459	17104	IPI00009507	NP_006745;NP_874384	ENSG00000008282	SYPL1	SYPL1{synaptophysin-like 1 [Source:HGNC Symbol,Acc:11507]}	1	1	1	1	1	1	4.2	4.2	4.2	28.565	259	3	7	0.00014562	4.2	4.2
466	3413	IPI00009680	NP_075066	ENSG00000135900	MRPL44	MRPL44{mitochondrial ribosomal protein L44 [Source:HGNC Symbol,Acc:16650]}	1	1	0	1	0	1	2.1	2.1	2.1	37.535	332		1	1.8142e-30	0	2.1
471	15455	IPI00746666	NP_001092257;NP_057610	ENSG00000177951	BET1L	BET1L{blocked early in transport 1 homolog (S. cerevisiae)-like [Source:HGNC Symbol,Acc:19348]}	1	1	1	1	1	1	9.9	9.9	9.9	17.107	152	1	3	0.0024283	9.9	9.9
474	18134	IPI00009817	NP_057649	ENSG00000181924	CHCHD8	CHCHD8{coiled-coil-helix-coiled-coil-helix domain containing 8 [Source:HGNC Symbol,Acc:24604]}	1	1	1	1	1	1	17.7	17.7	17.7	11.308	96	1	1	1.8668e-13	17.7	17.7
481	3281	IPI00009922	NP_112487	ENSG00000119705	C14orf156	C14orf156{chromosome 14 open reading frame 156 [Source:HGNC Symbol,Acc:20495]}	1	1	1	1	1	1	9.2	9.2	9.2	12.349	109	5	4	0.00012341	9.2	9.2
482	243;776;1345;2279;2428;4698;4699;8915;11507;12024;15139;19323	IPI00009923	NP_001017962;NP_001136067	ENSG00000122884	P4HA1	P4HA1{prolyl 4-hydroxylase, alpha polypeptide I [Source:HGNC Symbol,Acc:8546]}	12	1	10	12	1	1	21.5	21.5	3.2	61.049	534	18	47	2.0799e-94	17	21.5
484	1924;2167;2979;6922;18136	IPI00009943	NP_003286	ENSG00000133112	TPT1	TPT1{tumor protein, translationally-controlled 1 [Source:HGNC Symbol,Acc:12022]}	5	1	5	5	1	1	28.2	7.4	7.4	21.525	188	6	6	5.7222e-171	28.2	28.2
488	83;338;576;1400;3365;5225;5844;6139;6562;8157;8662;10444;10607;10609;11442;12529;15241;16301;16692;17274;18327;18657	IPI00009960	NP_006830;NP_001093640	ENSG00000132305	IMMT	IMMT{inner membrane protein, mitochondrial [Source:HGNC Symbol,Acc:6047]}	22	1	15	21	1	1	31.9	3.3	3.3	83.677	758	1	3	5.9195e-194	22.2	31.8
491	16624	IPI00010090	NP_002052	ENSG00000023909	GCLM	GCLM{glutamate-cysteine ligase, modifier subunit [Source:HGNC Symbol,Acc:4312]}	1	1	1	1	1	1	5.1	5.1	5.1	30.727	274	2	2	1.9903e-16	5.1	5.1
492	16952	IPI00010105	NP_002203;NP_852133;NP_852131	ENSG00000242372	EIF6	EIF6{eukaryotic translation initiation factor 6 [Source:HGNC Symbol,Acc:6159]}	1	1	0	1	0	1	9.8	9.8	9.8	26.599	245		2	1.9347e-69	0	9.8
495	90;6126	IPI00010133	NP_001180262;NP_009005	ENSG00000102879	CORO1A	CORO1A{coronin, actin binding protein, 1A [Source:HGNC Symbol,Acc:2252]}	2	1	1	2	1	1	5	3.5	3.5	51.026	461	1	1	1.4158e-09	3.5	5
500	19477	IPI00010157	NP_005902	ENSG00000168906	MAT2A	MAT2A{methionine adenosyltransferase II, alpha [Source:HGNC Symbol,Acc:6904]}	1	1	1	1	1	1	3.8	3.8	3.8	43.66	395	1	2	1.5708e-08	3.8	3.8
503	18039	IPI00010207	NP_057701	ENSG00000120686	UFM1	UFM1{ubiquitin-fold modifier 1 [Source:HGNC Symbol,Acc:20597]}	1	1	1	1	1	1	17.6	17.6	17.6	9.1175	85	1	11	6.5803e-24	17.6	17.6
520	9037	IPI00010438	NP_003816;NP_570710	ENSG00000092531	SNAP23	SNAP23{synaptosomal-associated protein, 23kDa [Source:HGNC Symbol,Acc:11131]}	1	1	0	1	0	1	6.6	6.6	6.6	23.354	211		3	0.0014571	0	6.6
524	9151	IPI00010486	NP_009147;NP_852608;NP_852609	ENSG00000110756	HPS5	HPS5{Hermansky-Pudlak syndrome 5 [Source:HGNC Symbol,Acc:17022]}	1	1	1	1	1	1	0.8	0.8	0.8	127.45	1129	3	1	0.0048614	0.8	0.8
525	10285	IPI01014355	NP_060533	ENSG00000119969	HELLS	HELLS{helicase, lymphoid-specific [Source:HGNC Symbol,Acc:4861]}	1	1	1	1	1	1	1	1	1	102.71	884	5	3	9.1781e-06	1	1
529	1460	IPI00010746	NP_055569	ENSG00000156471	PTDSS1	PTDSS1{phosphatidylserine synthase 1 [Source:HGNC Symbol,Acc:9587]}	1	1	1	1	1	1	3	3	3	55.527	473	8	8	3.0372e-23	3	3
540	8767	IPI00012448	NP_000077;NP_001035897	ENSG00000188603	CLN3	CLN3{ceroid-lipofuscinosis, neuronal 3 [Source:HGNC Symbol,Acc:2074]}	1	1	1	1	1	1	3.4	3.4	3.4	47.622	438	3	3	5.3217e-06	3.4	3.4
541	14588	IPI00010948	NP_003440	ENSG00000137313;ENSG00000226060;ENSG00000228881;ENSG00000230230;ENSG00000231002;ENSG00000231641;ENSG00000234046;ENSG00000234127	TRIM26	TRIM26{tripartite motif containing 26 [Source:HGNC Symbol,Acc:12962]}	1	1	1	1	1	1	2.8	2.8	2.8	62.165	539	1	1	3.4151e-12	2.8	2.8
543	15518	IPI00555694	NP_001013870;NP_061926	ENSG00000138190	EXOC6	EXOC6{exocyst complex component 6 [Source:HGNC Symbol,Acc:23196]}	1	1	1	1	1	1	1.5	1.5	1.5	95.347	820	5	4	1.6588e-07	1.5	1.5
550	6776	IPI00157833	NP_849194;NP_066960;NP_114160	ENSG00000174943;ENSG00000109079;ENSG00000110906	KCTD13;TNFAIP1;KCTD10	KCTD13{potassium channel tetramerisation domain containing 13 [Source:HGNC Symbol,Acc:22234]};TNFAIP1{tumor necrosis factor, alpha-induced protein 1 (endothelial) [Source:HGNC Symbol,Acc:11894]};KCTD10{potassium channel tetramerisation domain containing 10 [Source:HGNC Symbol,Acc:23236]}	1	1	1	1	1	1	3	3	3	36.357	329	4	4	7.3561e-07	3	3
551	7795	IPI00011217	NP_002486	ENSG00000164258	NDUFS4	NDUFS4{NADH dehydrogenase (ubiquinone) Fe-S protein 4, 18kDa (NADH-coenzyme Q reductase) [Source:HGNC Symbol,Acc:7711]}	1	1	1	1	1	1	8.6	8.6	8.6	20.108	175	1	11	5.0909e-06	8.6	8.6
564	16892	IPI00011528	NP_001028693;NP_001028694;NP_001315	ENSG00000101138	CSTF1	CSTF1{cleavage stimulation factor, 3' pre-RNA, subunit 1, 50kDa [Source:HGNC Symbol,Acc:2483]}	1	1	1	1	1	1	4.2	4.2	4.2	48.357	431	2	1	6.8261e-20	4.2	4.2
574	4857;6093;10046	IPI00011675	NP_003104;NP_001073860;NP_001193630;NP_001193631;NP_001193633	ENSG00000067066	SP100	SP100{SP100 nuclear antigen [Source:HGNC Symbol,Acc:11206]}	3	1	2	3	1	1	3.4	1.6	1.6	100.42	879	1	2	1.1146e-06	2.5	3.4
588	2506;3325;4886;6041;6042;13471;16425;18163;19677	IPI00375531	NP_000260;NP_937818;NP_001018146;NP_001018147;NP_001018148;NP_001018149;NP_001185611;NP_002503	ENSG00000239672;ENSG00000243678	NME1;NME1-NME2	NME1{non-metastatic cells 1, protein (NM23A) expressed in [Source:HGNC Symbol,Acc:7849]};NME1-NME2{NME1-NME2 readthrough [Source:HGNC Symbol,Acc:33531]}	9	1	8	8	0	1	55.4	7.9	7.9	19.653	177		5	1.9969e-136	47.5	44.6
596	18089	IPI00012208	NP_077010	ENSG00000182858	ALG12	ALG12{asparagine-linked glycosylation 12, alpha-1,6-mannosyltransferase homolog (S. cerevisiae) [Source:HGNC Symbol,Acc:19358]}	1	1	1	1	1	1	2	2	2	54.654	488	2	10	0.0010819	2	2
600	14682	IPI00012315	NP_002504	ENSG00000103024	NME3	NME3{non-metastatic cells 3, protein expressed in [Source:HGNC Symbol,Acc:7851]}	1	1	1	1	1	1	4.7	4.7	4.7	19.015	169	5	5	0.00031753	4.7	4.7
603	4518;8965;9509;13963	IPI00012345	NP_006266	ENSG00000124193	SRSF6	SRSF6{serine/arginine-rich splicing factor 6 [Source:HGNC Symbol,Acc:10788]}	4	1	4	4	1	1	10.2	2	2	39.586	344	2	3	7.8048e-30	10.2	10.2
605	1716;6251;15761	IPI00012382	NP_004587	ENSG00000077312	SNRPA	SNRPA{small nuclear ribonucleoprotein polypeptide A [Source:HGNC Symbol,Acc:11151]}	3	1	3	3	1	1	9.9	4.6	4.6	31.279	282	2	2	1.5087e-09	9.9	9.9
606	11287	IPI00607576	NP_114401	ENSG00000106771	C9orf5	C9orf5{chromosome 9 open reading frame 5 [Source:HGNC Symbol,Acc:1363]}	1	1	1	1	1	1	0.9	0.9	0.9	100.94	911	8	7	0.00024768	0.9	0.9
610	528;3537;9222;9531;11228	IPI00012451	NP_067642	ENSG00000114450	GNB4	GNB4{guanine nucleotide binding protein (G protein), beta polypeptide 4 [Source:HGNC Symbol,Acc:20731]}	5	1	5	5	1	1	16.2	3.2	3.2	37.567	340	7	5	4.8118e-34	16.2	16.2
611	5938	IPI00012462	NP_114414	ENSG00000144895	EIF2A	EIF2A{eukaryotic translation initiation factor 2A, 65kDa [Source:HGNC Symbol,Acc:3254]}	1	1	1	1	1	1	1.6	1.6	1.6	67.851	609	4	5	2.5883e-28	1.6	1.6
612	10054	IPI00795107	NP_001139632;NP_114415	ENSG00000147687	TATDN1	TATDN1{TatD DNase domain containing 1 [Source:HGNC Symbol,Acc:24220]}	1	1	1	1	1	1	2.4	2.4	2.4	37.65	333	5	3	0.004183	2.4	2.4
613	2347	IPI00012486	NP_001135920;NP_001135922;NP_114427;NP_001135923;NP_001135921	ENSG00000169682	SPNS1	SPNS1{spinster homolog 1 (Drosophila) [Source:HGNC Symbol,Acc:30621]}	1	1	1	1	1	1	1.9	1.9	1.9	61.105	573	3	2	0.00055117	1.9	1.9
629	2251	IPI00012773	NP_004680;NP_001190187	ENSG00000182979	MTA1	MTA1{metastasis associated 1 [Source:HGNC Symbol,Acc:7410]}	1	1	1	0	1	0	1.8	1.8	1.8	80.785	715	2		0.0015657	1.8	0
630	12235	IPI00012792	NP_001786	ENSG00000179776	CDH5	CDH5{cadherin 5, type 2 (vascular endothelium) [Source:HGNC Symbol,Acc:1764]}	1	1	1	1	1	1	2	2	2	87.527	784	1	1	8.0658e-05	2	2
633	78;16623	IPI00935184	NP_001155197;NP_001155198;NP_002710;NP_848701;NP_848702	ENSG00000078304	PPP2R5C	PPP2R5C{protein phosphatase 2, regulatory subunit B', gamma [Source:HGNC Symbol,Acc:9311]}	2	1	2	2	1	1	4.5	4.5	2.5	64.292	555	9	8	2.9321e-20	4.5	4.5
636	7077;13097	IPI00012866	NP_001014431;NP_001014432;NP_005154	ENSG00000142208	AKT1	AKT1{v-akt murine thymoma viral oncogene homolog 1 [Source:HGNC Symbol,Acc:391]}	2	1	1	2	0	1	3.3	1.7	1.7	55.686	480		1	0.00086349	1.7	3.3
643	868	IPI00013026	NP_008953	ENSG00000114395	CYB561D2	CYB561D2{cytochrome b-561 domain containing 2 [Source:HGNC Symbol,Acc:30253]}	1	1	1	1	1	1	5.4	5.4	5.4	23.973	222	2	3	1.3864e-05	5.4	5.4
649	5638	IPI00013160	NP_008824	ENSG00000143486	EIF2D	EIF2D{eukaryotic translation initiation factor 2D [Source:HGNC Symbol,Acc:6583]}	1	1	1	1	1	1	2.4	2.4	2.4	64.706	584	3	2	0.00014025	2.4	2.4
656	391	IPI00013236	NP_001172112;NP_005629;NP_001138621	ENSG00000124333	VAMP7	VAMP7{vesicle-associated membrane protein 7 [Source:HGNC Symbol,Acc:11486]}	1	1	1	1	1	1	3.5	3.5	3.5	30.216	260	2	2	1.0675e-07	3.5	3.5
658	2087;6660	IPI00013290	NP_001001520;NP_116020	ENSG00000167674	AC011498.1	AC011498.1{Hepatoma-derived growth factor-related protein 2 [Source:UniProtKB/Swiss-Prot,Acc:Q7Z4V5]}	2	1	1	2	0	1	2.2	1	1	74.815	676		5	1.2962e-06	1.2	2.2
661	19014	IPI00641788	NP_003084	ENSG00000124562	SNRPC	SNRPC{small nuclear ribonucleoprotein polypeptide C [Source:HGNC Symbol,Acc:11157]}	1	1	1	1	1	1	6.7	6.7	6.7	19.687	180	6	9	3.7724e-33	6.7	6.7
668	795;908;3613;4096;4946;5795;7635;8607;9799;10373;10446;10832;11900;13091;13716;15379;16269	IPI00013475	NP_001060;NP_821080	ENSG00000137267;ENSG00000137285	TUBB2A;TUBB2B	TUBB2A{tubulin, beta 2A [Source:HGNC Symbol,Acc:12412]};TUBB2B{tubulin, beta 2B [Source:HGNC Symbol,Acc:30829]}	17	1	17	16	1	1	52.4	6.1	3.4	49.906	445	4	11	0	52.4	48.5
678	10515	IPI00013721	NP_003904	ENSG00000112739	PRPF4B	PRPF4B{PRP4 pre-mRNA processing factor 4 homolog B (yeast) [Source:HGNC Symbol,Acc:17346]}	1	1	0	1	0	1	1.5	1.5	1.5	116.99	1007		1	0.00011729	0	1.5
679	6277	IPI00013723	NP_006212	ENSG00000127445	PIN1	PIN1{peptidylprolyl cis/trans isomerase, NIMA-interacting 1 [Source:HGNC Symbol,Acc:8988]}	1	1	1	1	1	1	9.2	9.2	9.2	18.243	163	1	2	7.4259e-05	9.2	9.2
685	3538	IPI00013829	NP_057483	ENSG00000170855	TRIAP1	TRIAP1{TP53 regulated inhibitor of apoptosis 1 [Source:HGNC Symbol,Acc:26937]}	1	1	1	1	1	1	18.4	18.4	18.4	8.7858	76	2	2	1.69e-23	18.4	18.4
690	944	IPI00376991	NP_057839;NP_006846	ENSG00000100196	KDELR3	KDELR3{KDEL (Lys-Asp-Glu-Leu) endoplasmic reticulum protein retention receptor 3 [Source:HGNC Symbol,Acc:6306]}	1	1	1	1	1	1	4.1	4.1	4.1	25.69	220	5	5	2.7285e-06	4.1	4.1
692	1319;2193;5980;7189;15795;16013;17711;19487;19884	IPI00479191	NP_005511	ENSG00000169045	HNRNPH1	HNRNPH1{heterogeneous nuclear ribonucleoprotein H1 (H) [Source:HGNC Symbol,Acc:5041]}	9	1	7	8	0	1	22	2.3	2.3	51.229	472		7	1.2756e-185	18.4	20.8
704	6133	IPI00797612	NP_060501	ENSG00000178252	WDR6	WDR6{WD repeat domain 6 [Source:HGNC Symbol,Acc:12758]}	1	1	1	1	1	1	0.8	0.8	0.8	125	1151	4	3	1.2841e-05	0.8	0.8
706	6343;7362;19083	IPI00013981	NP_005424;NP_002028;NP_694592;NP_694593;NP_005408;NP_938033	ENSG00000176105;ENSG00000010810;ENSG00000197122	YES1;FYN;SRC	YES1{v-yes-1 Yamaguchi sarcoma viral oncogene homolog 1 [Source:HGNC Symbol,Acc:12841]};FYN{FYN oncogene related to SRC, FGR, YES [Source:HGNC Symbol,Acc:4037]};SRC{v-src sarcoma (Schmidt-Ruppin A-2) viral oncogene homolog (avian) [Source:HGNC Symbol,Acc:11283]}	3	1	2	3	0	1	5	2	2	60.801	543		3	1.5379e-09	2.9	5
708	10699	IPI00014137	NP_653081;NP_055650	ENSG00000130703	OSBPL2	OSBPL2{oxysterol binding protein-like 2 [Source:HGNC Symbol,Acc:15761]}	1	1	1	1	1	1	2.7	2.7	2.7	55.201	480	4	1	2.2918e-21	2.7	2.7
709	18386	IPI00014149	NP_055488	ENSG00000104412	TTC35	TTC35{tetratricopeptide repeat domain 35 [Source:HGNC Symbol,Acc:28963]}	1	1	1	1	1	1	4.4	4.4	4.4	34.833	297	6	4	1.0068e-27	4.4	4.4
720	5271	IPI00014310	NP_003583	ENSG00000055130	CUL1	CUL1{cullin 1 [Source:HGNC Symbol,Acc:2551]}	1	1	1	1	1	1	1.3	1.3	1.3	89.677	776	1	1	0.00011228	1.3	1.3
723	10295	IPI00014344	NP_001387;NP_569120;NP_567824;NP_569122	ENSG00000157540	DYRK1A	DYRK1A{dual-specificity tyrosine-(Y)-phosphorylation regulated kinase 1A [Source:HGNC Symbol,Acc:3091]}	1	1	1	1	1	1	1.7	1.7	1.7	85.583	763	4	4	7.8171e-07	1.7	1.7
728	13493	IPI00014440	NP_006349	ENSG00000100372	SLC25A17	SLC25A17{solute carrier family 25 (mitochondrial carrier, peroxisomal membrane protein, 34kDa), member 17 [Source:HGNC Symbol,Acc:10987]}	1	1	1	1	1	1	2.9	2.9	2.9	34.566	307	10	10	0.0001837	2.9	2.9
734	772	IPI00014624	NP_001275	ENSG00000177879	AP3S1	AP3S1{adaptor-related protein complex 3, sigma 1 subunit [Source:HGNC Symbol,Acc:2013]}	1	1	1	1	1	1	4.1	4.1	4.1	32.144	293	5	4	0.00072971	4.1	4.1
735	4995;8229;9170;11330;15179;16187;16597;19841	IPI00334256	NP_874366;NP_001123639;NP_001123640	ENSG00000124467	PSG8	PSG8{pregnancy specific beta-1-glycoprotein 8 [Source:HGNC Symbol,Acc:9525]}	8	1	6	8	0	1	19	2.6	2.6	47.771	426		8	2.5125e-98	13.8	19
739	9318	IPI00014952	NP_060156;NP_001129061	ENSG00000196505	GDAP2	GDAP2{ganglioside induced differentiation associated protein 2 [Source:HGNC Symbol,Acc:18010]}	1	1	1	1	1	1	1.6	1.6	1.6	56.224	497	11	11	0.00021656	1.6	1.6
743	14349	IPI00015104	NP_001817	ENSG00000173207	CKS1B	CKS1B{CDC28 protein kinase regulatory subunit 1B [Source:HGNC Symbol,Acc:19083]}	1	1	1	1	1	1	20.3	20.3	20.3	9.6601	79	1	1	2.895e-09	20.3	20.3
746	3512	IPI00015361	NP_002615	ENSG00000123349	PFDN5	PFDN5{prefoldin subunit 5 [Source:HGNC Symbol,Acc:8869]}	1	1	1	1	1	1	9.7	9.7	9.7	17.328	154	1	6	0.00015864	9.7	9.7
749	9108	IPI00015505	NP_079023	ENSG00000166189	HPS6	HPS6{Hermansky-Pudlak syndrome 6 [Source:HGNC Symbol,Acc:18817]}	1	1	1	0	1	0	1.3	1.3	1.3	82.974	775	1		0.0023989	1.3	0
753	2953;4387;5461;7756;15290;19667	IPI00015671	NP_079079;NP_001165335	ENSG00000178462	TUBAL3	TUBAL3{tubulin, alpha-like 3 [Source:HGNC Symbol,Acc:23534]}	6	1	5	6	0	1	11.7	3.8	3.8	49.908	446		9	4.6235e-126	7.8	11.7
755	8644	IPI00015805	NP_060275	ENSG00000105538	RASIP1	RASIP1{Ras interacting protein 1 [Source:HGNC Symbol,Acc:24716]}	1	1	1	1	1	1	1.3	1.3	1.3	103.46	963	3	3	0.00031461	1.3	1.3
756	18716	IPI00015808	NP_037417	ENSG00000134697	GNL2	GNL2{guanine nucleotide binding protein-like 2 (nucleolar) [Source:HGNC Symbol,Acc:29925]}	1	1	1	1	1	1	1.2	1.2	1.2	83.654	731	1	2	0.0021713	1.2	1.2
761	2831	IPI00015865	NP_060295	ENSG00000116863	ADPRHL2	ADPRHL2{ADP-ribosylhydrolase like 2 [Source:HGNC Symbol,Acc:21304]}	1	1	1	1	1	1	3	3	3	38.946	363	1	2	0.00026875	3	3
764	19371	IPI00015902	NP_002600	ENSG00000113721	PDGFRB	PDGFRB{platelet-derived growth factor receptor, beta polypeptide [Source:HGNC Symbol,Acc:8804]}	1	1	1	1	1	1	0.9	0.9	0.9	123.97	1106	1	1	0.00037977	0.9	0.9
765	6990	IPI00015905	NP_055100	ENSG00000130713	EXOSC2	EXOSC2{exosome component 2 [Source:HGNC Symbol,Acc:17097]}	1	1	1	1	1	1	5.8	5.8	5.8	32.789	293	1	2	1.2459e-12	5.8	5.8
778	1256;2986	IPI00016250	NP_004851	ENSG00000129245	FXR2	FXR2{fragile X mental retardation, autosomal homolog 2 [Source:HGNC Symbol,Acc:4024]}	2	1	1	2	1	1	4.3	1.5	1.5	74.222	673	1	2	4.1057e-40	1.5	4.3
787	4943	IPI00016458	NP_079160	ENSG00000087299	L2HGDH	L2HGDH{L-2-hydroxyglutarate dehydrogenase [Source:HGNC Symbol,Acc:20499]}	1	1	1	1	1	1	2.4	2.4	2.4	50.315	463	2	1	0.002267	2.4	2.4
792	6175	IPI00925251	NP_001140165;NP_003087	ENSG00000224543;ENSG00000143977	AC012318.1;SNRPG	AC012318.1{small nuclear ribonucleoprotein G-like protein [Source:RefSeq peptide,Acc:NP_001140165]};SNRPG{small nuclear ribonucleoprotein polypeptide G [Source:HGNC Symbol,Acc:11163]}	1	1	1	1	1	1	14	14	14	9.7104	86	4	6	1.0704e-24	14	14
793	17990	IPI00927646	NP_001186089;NP_001186090;NP_001186091;NP_006668	ENSG00000172046	USP19	USP19{ubiquitin specific peptidase 19 [Source:HGNC Symbol,Acc:12617]}	1	1	1	1	1	1	0.6	0.6	0.6	156.03	1419	7	6	2.8743e-11	0.6	0.6
800	7356	IPI00016670	NP_060377	ENSG00000149357	LAMTOR1	LAMTOR1{late endosomal/lysosomal adaptor, MAPK and MTOR activator 1 [Source:HGNC Symbol,Acc:26068]}	1	1	1	1	1	1	8.1	8.1	8.1	17.745	161	6	15	1.0461e-27	8.1	8.1
805	5690	IPI00016859	NP_001510;NP_663718	ENSG00000185024	BRF1	BRF1{BRF1 homolog, subunit of RNA polymerase III transcription initiation factor IIIB (S. cerevisiae) [Source:HGNC Symbol,Acc:11551]}	1	1	1	1	1	1	1.2	1.2	1.2	73.839	677	2	7	0.0050923	1.2	1.2
809	9617	IPI00016912	NP_003305	ENSG00000113312	TTC1	TTC1{tetratricopeptide repeat domain 1 [Source:HGNC Symbol,Acc:12391]}	1	1	1	1	1	1	3.4	3.4	3.4	33.526	292	1	4	0.0021703	3.4	3.4
812	6950	IPI00016968	NP_002992;NP_001030589;NP_001030590	ENSG00000143252	SDHC	SDHC{succinate dehydrogenase complex, subunit C, integral membrane protein, 15kDa [Source:HGNC Symbol,Acc:10682]}	1	1	1	1	1	1	4.7	4.7	4.7	18.61	169	4	6	0.0012434	4.7	4.7
813	15507	IPI00016988	NP_001159898;NP_060353	ENSG00000101940	WDR13	WDR13{WD repeat domain 13 [Source:HGNC Symbol,Acc:14352]}	1	1	1	1	1	1	2.1	2.1	2.1	53.695	485	5	4	0.00011179	2.1	2.1
814	9729	IPI00017160	NP_057569	ENSG00000009844	VTA1	VTA1{Vps20-associated 1 homolog (S. cerevisiae) [Source:HGNC Symbol,Acc:20954]}	1	1	1	1	1	1	3.3	3.3	3.3	33.879	307	2	2	0.0051705	3.3	3.3
818	126;446;3217;6705;7109;8715;9090;9265;9552;11059;11062;12685;12741;13302	IPI00017292	NP_001091679;NP_001091680;NP_001895	ENSG00000168036	CTNNB1	CTNNB1{catenin (cadherin-associated protein), beta 1, 88kDa [Source:HGNC Symbol,Acc:2514]}	14	1	12	14	0	1	21.9	2.3	2.3	85.496	781		1	3.7969e-213	17.4	21.9
829	3151	IPI00017450	NP_002087	ENSG00000125651	GTF2F1	GTF2F1{general transcription factor IIF, polypeptide 1, 74kDa [Source:HGNC Symbol,Acc:4652]}	1	1	1	1	1	1	2.3	2.3	2.3	58.24	517	2	2	3.9614e-17	2.3	2.3
833	16524	IPI00017533	YP_003024032	ENSG00000198938	MT-CO3	MT-CO3{mitochondrially encoded cytochrome c oxidase III [Source:HGNC Symbol,Acc:7422]}	1	1	1	1	1	1	4.2	4.2	4.2	30.114	262	9	2	0.00065123	4.2	4.2
843	10304;10824	IPI00654865	NP_055966;NP_996773;NP_996774;NP_001139588;NP_001139586;NP_996772;NP_001139587	ENSG00000160305	DIP2A	DIP2A{DIP2 disco-interacting protein 2 homolog A (Drosophila) [Source:HGNC Symbol,Acc:17217]}	2	1	2	2	1	1	1.2	0.6	0.6	170.44	1572	1	2	2.3607e-12	1.2	1.2
845	7005	IPI00017767	NP_001191295;NP_001191296;NP_002404	ENSG00000085871	MGST2	MGST2{microsomal glutathione S-transferase 2 [Source:HGNC Symbol,Acc:7063]}	1	1	1	1	1	1	8.2	8.2	8.2	16.62	147	2	1	0.0054902	8.2	8.2
868	4965	IPI00018387	NP_002560	ENSG00000140564	FURIN	FURIN{furin (paired basic amino acid cleaving enzyme) [Source:HGNC Symbol,Acc:8568]}	1	1	1	1	1	1	1.6	1.6	1.6	86.677	794	3	5	2.1525e-10	1.6	1.6
879	11943	IPI00018783	NP_258412	ENSG00000125877	ITPA	ITPA{inosine triphosphatase (nucleoside triphosphate pyrophosphatase) [Source:HGNC Symbol,Acc:6176]}	1	1	0	1	0	1	6.2	6.2	6.2	21.445	194		2	5.2737e-33	0	6.2
882	10398;12382;13871	IPI01008742	NP_001188291;NP_004233;NP_620058	ENSG00000118418	HMGN3	HMGN3{high mobility group nucleosomal binding domain 3 [Source:HGNC Symbol,Acc:12312]}	3	1	2	3	0	1	16.9	16.9	6.9	13.956	130	3	11	9.3259e-14	10	16.9
883	15387	IPI00018855	NP_001185498;NP_001685	ENSG00000185883	ATP6V0C	ATP6V0C{ATPase, H+ transporting, lysosomal 16kDa, V0 subunit c [Source:HGNC Symbol,Acc:855]}	1	1	1	1	1	1	11.6	11.6	11.6	15.736	155	1	6	5.2946e-61	11.6	11.6
896	7163	IPI00019141	NP_006402;NP_116130	ENSG00000204310;ENSG00000206324;ENSG00000226467;ENSG00000227642;ENSG00000228892;ENSG00000235758;ENSG00000236873	AGPAT1	AGPAT1{1-acylglycerol-3-phosphate O-acyltransferase 1 (lysophosphatidic acid acyltransferase, alpha) [Source:HGNC Symbol,Acc:324]}	1	1	1	1	1	1	2.8	2.8	2.8	31.716	283	3	4	0.0039716	2.8	2.8
898	17829	IPI00019158					1	1	1	1	1	1	1.2	1.2	1.2	88.672	824	1	3	0.0023674	1.2	1.2
903	2003;12629;19710	IPI00019329	NP_001032583;NP_001032584;NP_003737	ENSG00000088986	DYNLL1	DYNLL1{dynein, light chain, LC8-type 1 [Source:HGNC Symbol,Acc:15476]}	3	1	3	3	1	1	21.3	21.3	7.9	10.366	89	18	25	5.0009e-29	21.3	21.3
904	9944;11112;15102;18109;19257	IPI00019345	NP_001010935;NP_002875	ENSG00000116473	RAP1A	RAP1A{RAP1A, member of RAS oncogene family [Source:HGNC Symbol,Acc:9855]}	5	1	5	5	1	1	34.2	8.2	8.2	20.987	184	2	7	2.3577e-99	34.2	34.2
908	5815;14881	IPI00019381	NP_060717;NP_001137430	ENSG00000112697	TMEM30A	TMEM30A{transmembrane protein 30A [Source:HGNC Symbol,Acc:16667]}	2	1	1	2	0	1	4.4	2.2	2.2	40.683	361		1	2.9368e-06	2.2	4.4
918	2865	IPI00019495	NP_006510	ENSG00000146425	DYNLT1	DYNLT1{dynein, light chain, Tctex-type 1 [Source:HGNC Symbol,Acc:11697]}	1	1	0	1	0	1	14.2	14.2	14.2	12.452	113		4	3.2394e-19	0	14.2
920	12021	IPI00719725	NP_001157632;NP_001157633;NP_001157634;NP_001157635;NP_060782;NP_001157636	ENSG00000110075	PPP6R3	PPP6R3{protein phosphatase 6, regulatory subunit 3 [Source:HGNC Symbol,Acc:1173]}	1	1	1	1	1	1	0.9	0.9	0.9	98.484	879	7	1	0.0020741	0.9	0.9
936	17690	IPI00019941	NP_001191375;NP_001191376;NP_060817	ENSG00000125843	C20orf29	C20orf29{chromosome 20 open reading frame 29 [Source:HGNC Symbol,Acc:15875]}	1	1	1	1	1	1	5	5	5	22.522	200	5	1	1.1163e-10	5	5
941	17072	IPI00792743	NP_001013865;NP_079031	ENSG00000137776	SLTM	SLTM{SAFB-like, transcription modulator [Source:HGNC Symbol,Acc:20709]}	1	1	1	1	1	1	1.4	1.4	1.4	117.15	1034	1	1	0.0023679	1.4	1.4
943	8022	IPI00020007	NP_060838	ENSG00000168216	LMBRD1	LMBRD1{LMBR1 domain containing 1 [Source:HGNC Symbol,Acc:23038]}	1	1	0	1	0	1	3.3	3.3	3.3	61.388	540		1	8.6912e-31	0	3.3
944	3392	IPI00980337	NP_001186752;NP_006147	ENSG00000255526;ENSG00000129559	NEDD8-MDP1;NEDD8	NEDD8-MDP1{NEDD8-MDP1 readthrough [Source:HGNC Symbol,Acc:39551]};NEDD8{neural precursor cell expressed, developmentally down-regulated 8 [Source:HGNC Symbol,Acc:7732]}	1	1	0	1	0	1	7.3	7.3	7.3	22.027	193		4	0.00031272	0	7.3
946	6865	IPI00020030	NP_060845	ENSG00000029364	SLC39A9	SLC39A9{solute carrier family 39 (zinc transporter), member 9 [Source:HGNC Symbol,Acc:20182]}	1	1	1	0	1	0	4.9	4.9	4.9	32.251	307	1		3.6477e-08	4.9	0
948	16720	IPI00020050	NP_060850	ENSG00000182810	DDX28	DDX28{DEAD (Asp-Glu-Ala-Asp) box polypeptide 28 [Source:HGNC Symbol,Acc:17330]}	1	1	1	1	1	1	2	2	2	59.58	540	6	4	0.00057583	2	2
950	19328	IPI00020062	NP_001164174;NP_001164175;NP_060858;NP_597846;NP_001164172;NP_001164173	ENSG00000076770	MBNL3	MBNL3{muscleblind-like 3 (Drosophila) [Source:HGNC Symbol,Acc:20564]}	1	1	1	1	1	1	3.1	3.1	3.1	38.531	354	5	5	1.0049e-10	3.1	3.1
953	11109	IPI00020124	NP_060895	ENSG00000155252;ENSG00000249967	PI4K2A;RP11-548K23.11	PI4K2A{phosphatidylinositol 4-kinase type 2 alpha [Source:HGNC Symbol,Acc:30031]};RP11-548K23.11{Uncharacterized protein [Source:UniProtKB/TrEMBL,Acc:E9PAM4]}	1	1	1	1	1	1	1.9	1.9	1.9	54.022	479	10	5	0.00020599	1.9	1.9
955	61;3118;5474;14249	IPI00294426	NP_003478;NP_631961	ENSG00000172660	TAF15	TAF15{TAF15 RNA polymerase II, TATA box binding protein (TBP)-associated factor, 68kDa [Source:HGNC Symbol,Acc:11547]}	4	1	4	4	1	1	6.2	1.4	1.4	61.829	592	3	4	1.6888e-15	6.2	6.2
974	2587	IPI00020719	NP_001193420;NP_065797	ENSG00000088888	MAVS	MAVS{mitochondrial antiviral signaling protein [Source:HGNC Symbol,Acc:29233]}	1	1	1	1	1	1	2.2	2.2	2.2	56.527	540	3	1	0.0019347	2.2	2.2
983	426	IPI00925635	NP_001139478;NP_004961	ENSG00000099769	IGFALS	IGFALS{insulin-like growth factor binding protein, acid labile subunit [Source:HGNC Symbol,Acc:5468]}	1	1	1	1	1	1	1.6	1.6	1.6	70.235	643	2	1	0.0016417	1.6	1.6
988	10474	IPI00021106	NP_005098;NP_001138936	ENSG00000157036	EXOG	EXOG{endo/exonuclease (5'-3'), endonuclease G-like [Source:HGNC Symbol,Acc:3347]}	1	1	1	1	1	1	3.3	3.3	3.3	41.084	368	9	7	0.0012579	3.3	3.3
990	2972	IPI00021147	NP_003667	ENSG00000143753	DEGS1	DEGS1{degenerative spermatocyte homolog 1, lipid desaturase (Drosophila) [Source:HGNC Symbol,Acc:13709]}	1	1	1	1	1	1	4.6	4.6	4.6	37.866	323	1	2	1.2888e-97	4.6	4.6
991	16861	IPI00021167	NP_001132990;NP_003681;NP_001132989	ENSG00000180228	PRKRA	PRKRA{protein kinase, interferon-inducible double stranded RNA dependent activator [Source:HGNC Symbol,Acc:9438]}	1	1	1	1	1	1	3.8	3.8	3.8	34.404	313	2	1	0.0022335	3.8	3.8
999	2077	IPI00021326	NP_001123512;NP_003020;NP_001123513;NP_001189788;NP_892113	ENSG00000160691	SHC1	SHC1{SHC (Src homology 2 domain containing) transforming protein 1 [Source:HGNC Symbol,Acc:10840]}	1	1	1	1	1	1	2.2	2.2	2.2	62.892	584	3	3	1.2066e-06	2.2	2.2
1005	136;509;1162;1163;1185;1225;2054;2792;3052;3179;4175;7359;7453;7641;7851;7891;8906;9591;10201;10242;10335;10365;10697;11619;12022;12317;12421;13079;13564;13713;14305;15336;15503;15777;16244;16582;17289;17290	IPI00021405	NP_733821;NP_733822	ENSG00000160789	LMNA	LMNA{lamin A/C [Source:HGNC Symbol,Acc:6636]}	38	1	33	37	1	1	55.3	55.3	4.1	74.139	664	151	331	0	49.1	51.5
1008	3503	IPI00021453	NP_003704	ENSG00000162407	PPAP2B	PPAP2B{phosphatidic acid phosphatase type 2B [Source:HGNC Symbol,Acc:9229]}	1	1	0	1	0	1	3.5	3.5	3.5	35.116	311		3	0.00093418	0	3.5
1010	14462	IPI00021537	NP_031372	ENSG00000060491	OGFR	OGFR{opioid growth factor receptor [Source:HGNC Symbol,Acc:15768]}	1	1	1	1	1	1	1.8	1.8	1.8	73.324	677	4	3	5.2411e-07	1.8	1.8
1012	9996	IPI00021626	NP_077297	ENSG00000126254	RBM42	RBM42{RNA binding motif protein 42 [Source:HGNC Symbol,Acc:28117]}	1	1	1	1	1	1	2.1	2.1	2.1	50.413	480	4	2	0.00027467	2.1	2.1
1013	14617;16626	IPI00021634	NP_001128247;NP_001128248;NP_073733;NP_001128246	ENSG00000174996	KLC2	KLC2{kinesin light chain 2 [Source:HGNC Symbol,Acc:20716]}	2	1	2	2	1	1	3.7	1.4	1.4	68.934	622	2	1	4.3764e-12	3.7	3.7
1014	19327	IPI00021692	NP_997176;NP_066368;NP_997175;NP_659002;NP_997187;NP_997180;NP_997179;NP_997178;NP_997177	ENSG00000152601;ENSG00000139793	MBNL1;MBNL2	MBNL1{muscleblind-like (Drosophila) [Source:HGNC Symbol,Acc:6923]};MBNL2{muscleblind-like 2 (Drosophila) [Source:HGNC Symbol,Acc:16746]}	1	1	1	1	1	1	2.8	2.8	2.8	41.817	388	1	2	0.0012636	2.8	2.8
1015	6272;14748;15967;19370	IPI00021695	NP_001001323;NP_001673;NP_001001331;NP_001001344;NP_001674	ENSG00000070961;ENSG00000157087;ENSG00000067842	ATP2B1;ATP2B2;ATP2B3	ATP2B1{ATPase, Ca++ transporting, plasma membrane 1 [Source:HGNC Symbol,Acc:814]};ATP2B2{ATPase, Ca++ transporting, plasma membrane 2 [Source:HGNC Symbol,Acc:815]};ATP2B3{ATPase, Ca++ transporting, plasma membrane 3 [Source:HGNC Symbol,Acc:816]}	4	1	3	4	1	1	2.8	0.7	0.7	138.75	1258	1	1	3.962e-57	1.4	2.8
1022	11288	IPI00021805	NP_064696;NP_665707;NP_665734;NP_665735	ENSG00000008394	MGST1	MGST1{microsomal glutathione S-transferase 1 [Source:HGNC Symbol,Acc:7061]}	1	1	1	1	1	1	10.3	10.3	10.3	17.598	155	1	2	7.9995e-08	10.3	10.3
1026	19486	IPI00911093	NP_000303	ENSG00000115718	PROC	PROC{protein C (inactivator of coagulation factors Va and VIIIa) [Source:HGNC Symbol,Acc:9451]}	1	1	1	1	1	1	1.9	1.9	1.9	57.386	517	8	9	0.00013938	1.9	1.9
1027	17742	IPI00021828	NP_000091	ENSG00000160213	CSTB	CSTB{cystatin B (stefin B) [Source:HGNC Symbol,Acc:2482]}	1	1	1	1	1	1	12.2	12.2	12.2	11.139	98	10	14	2.6574e-43	12.2	12.2
1033	4211	IPI00021855	NP_001636	ENSG00000130208	APOC1	APOC1{apolipoprotein C-I [Source:HGNC Symbol,Acc:607]}	1	1	1	0	1	0	10.8	10.8	10.8	9.3318	83	2		0.0033825	10.8	0
1034	6600	IPI00657670	NP_000031	ENSG00000110245	APOC3	APOC3{apolipoprotein C-III [Source:HGNC Symbol,Acc:610]}	1	1	0	1	0	1	9.4	9.4	9.4	12.815	117		3	0.00055117	0	9.4
1036	6159	IPI00021890	NP_055049	ENSG00000112474;ENSG00000204228;ENSG00000225312;ENSG00000228357;ENSG00000228712;ENSG00000232357	HSD17B8	HSD17B8{hydroxysteroid (17-beta) dehydrogenase 8 [Source:HGNC Symbol,Acc:3554]}	1	1	1	1	1	1	5.4	5.4	5.4	26.973	261	1	1	5.8973e-07	5.4	5.4
1046	5647	IPI00397348	NP_055875	ENSG00000105778	AVL9	AVL9{AVL9 homolog (S. cerevisiase) [Source:HGNC Symbol,Acc:28994]}	1	1	1	1	1	1	1.9	1.9	1.9	71.947	648	4	6	5.2411e-07	1.9	1.9
1049	18884	IPI00022091	NP_001072113;NP_003894	ENSG00000130177	CDC16	CDC16{cell division cycle 16 homolog (S. cerevisiae) [Source:HGNC Symbol,Acc:1720]}	1	1	1	1	1	1	1.3	1.3	1.3	71.655	620	4	4	0.00017289	1.3	1.3
1057	11188	IPI00022254	NP_071933	ENSG00000144848	ATG3	ATG3{ATG3 autophagy related 3 homolog (S. cerevisiae) [Source:HGNC Symbol,Acc:20962]}	1	1	1	1	1	1	3.2	3.2	3.2	35.864	314	5	5	1.7481e-28	3.2	3.2
1058	5641	IPI00022255	NP_006409	ENSG00000102837	OLFM4	OLFM4{olfactomedin 4 [Source:HGNC Symbol,Acc:17190]}	1	1	1	1	1	1	2.2	2.2	2.2	57.279	510	3	3	0.0001362	2.2	2.2
1068	17987	IPI00022386	NP_005774	ENSG00000115514	TXNDC9	TXNDC9{thioredoxin domain containing 9 [Source:HGNC Symbol,Acc:24110]}	1	1	1	1	1	1	4	4	4	26.534	226	2	7	0.00014939	4	4
1072	19921	IPI00022420	NP_006735	ENSG00000138207	RBP4	RBP4{retinol binding protein 4, plasma [Source:HGNC Symbol,Acc:9922]}	1	1	1	1	1	1	5	5	5	23.01	201	12	15	2.2245e-10	5	5
1079	12265	IPI00022447	NP_055688	ENSG00000123684	LPGAT1	LPGAT1{lysophosphatidylglycerol acyltransferase 1 [Source:HGNC Symbol,Acc:28985]}	1	1	1	0	1	0	2.7	2.7	2.7	43.089	370	2		0.0032887	2.7	0
1086	13789	IPI00022543	NP_005473	ENSG00000142892	PIGK	PIGK{phosphatidylinositol glycan anchor biosynthesis, class K [Source:HGNC Symbol,Acc:8965]}	1	1	1	1	1	1	3	3	3	45.251	395	2	3	0.0013119	3	3
1087	12385	IPI00022558	NP_003944	ENSG00000197965	MPZL1	MPZL1{myelin protein zero-like 1 [Source:HGNC Symbol,Acc:7226]}	1	1	0	1	0	1	4.1	4.1	4.1	29.082	269		2	0.0041042	0	4.1
1089	17038	IPI00022621	NP_002394;NP_059453;NP_001128719;NP_001128720	ENSG00000117122	MFAP2	MFAP2{microfibrillar-associated protein 2 [Source:HGNC Symbol,Acc:7033]}	1	1	1	1	1	1	5.5	5.5	5.5	20.825	183	2	3	0.0001062	5.5	5.5
1101	7113	IPI00022895	NP_570602	ENSG00000121410	A1BG	A1BG{alpha-1-B glycoprotein [Source:HGNC Symbol,Acc:5]}	1	1	1	1	1	1	2.4	2.4	2.4	54.253	495	1	2	1.5935e-09	2.4	2.4
1104	1577	IPI00023004	NP_004672;NP_001403	ENSG00000198692;ENSG00000173674	EIF1AY;EIF1AX	EIF1AY{eukaryotic translation initiation factor 1A, Y-linked [Source:HGNC Symbol,Acc:3252]};EIF1AX{eukaryotic translation initiation factor 1A, X-linked [Source:HGNC Symbol,Acc:3250]}	1	1	1	1	1	1	6.9	6.9	6.9	16.442	144	3	6	2.2801e-10	6.9	6.9
1108	2629	IPI00023095	NP_005430	ENSG00000089693	MLF2	MLF2{myeloid leukemia factor 2 [Source:HGNC Symbol,Acc:7126]}	1	1	1	0	1	0	7.3	7.3	7.3	28.147	248	2		1.0995e-39	7.3	0
1112	10660	IPI00981423	NP_001001433;NP_001191797;NP_001128244;NP_001128245;NP_003754	ENSG00000254995;ENSG00000124222	RP11-261P9.5;STX16	RP11-261P9.5{syntaxin-16 isoform e [Source:RefSeq peptide,Acc:NP_001191797]};STX16{syntaxin 16 [Source:HGNC Symbol,Acc:11431]}	1	1	1	1	1	1	2.4	2.4	2.4	43.229	382	2	2	0.0044786	2.4	2.4
1113	5766	IPI00023161	NP_071446	ENSG00000173867	MRPL46	MRPL46{mitochondrial ribosomal protein L46 [Source:HGNC Symbol,Acc:1192]}	1	1	1	1	1	1	2.9	2.9	2.9	31.705	279	2	3	6.799e-05	2.9	2.9
1116	3033	IPI00218501	NP_001026	ENSG00000198626	RYR2	RYR2{ryanodine receptor 2 (cardiac) [Source:HGNC Symbol,Acc:10484]}	1	1	0	1	0	1	0.2	0.2	0.2	565.41	4975		1	0.0047861	0	0.2
1122	11127	IPI00023502	NP_000557;NP_001017986;NP_001004340	ENSG00000150337;ENSG00000198019	FCGR1A;FCGR1B	FCGR1A{Fc fragment of IgG, high affinity Ia, receptor (CD64) [Source:HGNC Symbol,Acc:3613]};FCGR1B{Fc fragment of IgG, high affinity Ib, receptor (CD64) [Source:HGNC Symbol,Acc:3614]}	1	1	1	1	1	1	2.4	2.4	2.4	42.631	374	3	3	7.991e-05	2.4	2.4
1123	10271;16941	IPI00910170	NP_612462;NP_002857;NP_002858;NP_004274	ENSG00000152932;ENSG00000105649;ENSG00000169213;ENSG00000105514	RAB3C;RAB3A;RAB3B;RAB3D	RAB3C{RAB3C, member RAS oncogene family [Source:HGNC Symbol,Acc:30269]};RAB3A{RAB3A, member RAS oncogene family [Source:HGNC Symbol,Acc:9777]};RAB3B{RAB3B, member RAS oncogene family [Source:HGNC Symbol,Acc:9778]};RAB3D{RAB3D, member RAS oncogene family [Source:HGNC Symbol,Acc:9779]}	2	1	2	2	1	1	9.6	2.1	2.1	33.474	292	1	2	2.8533e-17	9.6	9.6
1125	5821;7362	IPI00023529	NP_001138778;NP_001250	ENSG00000105810	CDK6	CDK6{cyclin-dependent kinase 6 [Source:HGNC Symbol,Acc:1777]}	2	1	2	2	1	1	5.2	2.8	2.8	36.938	326	3	4	5.1251e-07	5.2	5.2
1128	906;1466;3613;4946;5212;7635;8607;9800;10372;10446;10832;11900;12647;13716;15379;16269;19612	IPI00023598	NP_006078	ENSG00000104833	TUBB4	TUBB4{tubulin, beta 4 [Source:HGNC Symbol,Acc:20774]}	17	1	16	17	1	1	53.8	5.6	3.8	49.585	444	12	7	0	52	53.8
1130	7277	IPI00023605	NP_689449	ENSG00000128283	CDC42EP1	CDC42EP1{CDC42 effector protein (Rho GTPase binding) 1 [Source:HGNC Symbol,Acc:17014]}	1	1	1	1	1	1	4.6	4.6	4.6	40.294	391	1	1	5.708e-16	4.6	4.6
1136	16379	IPI00023736	NP_003380;NP_438171	ENSG00000106789	CORO2A	CORO2A{coronin, actin binding protein, 2A [Source:HGNC Symbol,Acc:2255]}	1	1	1	1	1	1	2.1	2.1	2.1	59.763	525	4	4	7.1533e-16	2.1	2.1
1142	8109	IPI00023972	NP_057439;NP_957518	ENSG00000213782	DDX47	DDX47{DEAD (Asp-Glu-Ala-Asp) box polypeptide 47 [Source:HGNC Symbol,Acc:18682]}	1	1	1	1	1	1	2.2	2.2	2.2	50.646	455	4	5	0.00032159	2.2	2.2
1152	1352;17904	IPI00024254	NP_001026853;NP_001540	ENSG00000119917	IFIT3	IFIT3{interferon-induced protein with tetratricopeptide repeats 3 [Source:HGNC Symbol,Acc:5411]}	2	1	1	2	1	1	3.5	2.2	2.2	55.984	490	3	1	1.583e-05	2.2	3.5
1154	7454;9164;10271;15919;16583;17134	IPI00024282	NP_057614	ENSG00000166128	RAB8B	RAB8B{RAB8B, member RAS oncogene family [Source:HGNC Symbol,Acc:30273]}	6	1	6	6	1	1	28	6.8	6.8	23.584	207	4	4	2.3376e-96	28	28
1155	5753	IPI00024283	NP_065881	ENSG00000085449	WDFY1	WDFY1{WD repeat and FYVE domain containing 1 [Source:HGNC Symbol,Acc:20451]}	1	1	1	1	1	1	3.9	3.9	3.9	46.323	410	1	2	8.074e-10	3.9	3.9
1164	1051;9544;13852;16492	IPI00024467	NP_064506	ENSG00000102595	UGGT2	UGGT2{UDP-glucose glycoprotein glucosyltransferase 2 [Source:HGNC Symbol,Acc:15664]}	4	1	3	4	1	1	2.2	0.7	0.7	174.73	1516	1	1	1.0117e-09	1.6	2.2
1165	6556	IPI00024521	NP_064526	ENSG00000215717	TMEM167B	TMEM167B{transmembrane protein 167B [Source:HGNC Symbol,Acc:30187]}	1	1	1	1	1	1	10.8	10.8	10.8	8.2941	74	4	3	5.9678e-05	10.8	10.8
1166	4870;6771;8751	IPI00024539	NP_005391	ENSG00000171132	PRKCE	PRKCE{protein kinase C, epsilon [Source:HGNC Symbol,Acc:9401]}	3	1	3	2	1	0	3.5	2.7	1.8	83.673	737	3	2	2.1776e-05	3.5	1.8
1168	18069	IPI00024551	NP_064539	ENSG00000134153	C15orf24	C15orf24{chromosome 15 open reading frame 24 [Source:HGNC Symbol,Acc:24301]}	1	1	0	1	0	1	5.4	5.4	5.4	26.47	242		3	0.0028819	0	5.4
1172	18054	IPI00026448	NP_064579	ENSG00000168958	MFF	MFF{mitochondrial fission factor [Source:HGNC Symbol,Acc:24858]}	1	1	1	1	1	1	7.9	7.9	7.9	38.464	342	2	2	8.0653e-05	7.9	7.9
1181	18721	IPI00917259	NP_932766;NP_001171989;NP_001171990;NP_001171991	ENSG00000250424;ENSG00000240583	RP5-877J2.1;AQP1	RP5-877J2.1{cDNA FLJ51453, highly similar to Aquaporin-1 [Source:UniProtKB/TrEMBL,Acc:B4E220]};AQP1{aquaporin 1 (Colton blood group) [Source:HGNC Symbol,Acc:633]}	1	1	0	1	0	1	6.1	6.1	6.1	35.574	329		3	3.3327e-53	0	6.1
1182	19097	IPI00657692	NP_001123577;NP_005704;NP_112729	ENSG00000113163	COL4A3BP	COL4A3BP{collagen, type IV, alpha 3 (Goodpasture antigen) binding protein [Source:HGNC Symbol,Acc:2205]}	1	1	1	1	1	1	1.5	1.5	1.5	83.707	752	6	4	0.00065123	1.5	1.5
1183	17333	IPI00024705	NP_005707;NP_974196;NP_974197;NP_974198;NP_974199;NP_974223;NP_573568	ENSG00000123159;ENSG00000179855	GIPC1;GIPC3	GIPC1{GIPC PDZ domain containing family, member 1 [Source:HGNC Symbol,Acc:1226]};GIPC3{GIPC PDZ domain containing family, member 3 [Source:HGNC Symbol,Acc:18183]}	1	1	1	0	1	0	3.6	3.6	3.6	36.049	333	2		0.0041613	3.6	0
1186	7497	IPI00106494	NP_001135742;NP_001135743;NP_005762;NP_954674	ENSG00000073737	DHRS9	DHRS9{dehydrogenase/reductase (SDR family) member 9 [Source:HGNC Symbol,Acc:16888]}	1	1	1	1	1	1	3.2	3.2	3.2	41.926	379	1	1	0.00023853	3.2	3.2
1190	700	IPI00983351	NP_766638;NP_066025;NP_001164161	ENSG00000175356;ENSG00000159307	SCUBE2;SCUBE1	SCUBE2{signal peptide, CUB domain, EGF-like 2 [Source:HGNC Symbol,Acc:30425]};SCUBE1{signal peptide, CUB domain, EGF-like 1 [Source:HGNC Symbol,Acc:13441]}	1	1	1	1	1	1	1.4	1.4	1.4	112.94	1028	5	4	5.7052e-06	1.4	1.4
1192	5663;6479;12502	IPI00024913	NP_004640;NP_937798	ENSG00000160221	C21orf33	C21orf33{chromosome 21 open reading frame 33 [Source:HGNC Symbol,Acc:1273]}	3	1	3	3	1	1	16.8	3	3	28.17	268	2	8	1.2134e-49	16.8	16.8
1199	11177	IPI00024976	NP_064628	ENSG00000100216	TOMM22	TOMM22{translocase of outer mitochondrial membrane 22 homolog (yeast) [Source:HGNC Symbol,Acc:18002]}	1	1	1	1	1	1	7.7	7.7	7.7	15.521	142	12	13	1.0349e-10	7.7	7.7
1200	17198	IPI00024983	NP_005610;NP_996784	ENSG00000125744	RTN2	RTN2{reticulon 2 [Source:HGNC Symbol,Acc:10468]}	1	1	1	1	1	1	1.5	1.5	1.5	59.263	545	6	6	0.002546	1.5	1.5
1211	5776	IPI00025155	NP_005851	ENSG00000070404	FSTL3	FSTL3{follistatin-like 3 (secreted glycoprotein) [Source:HGNC Symbol,Acc:3973]}	1	1	1	1	1	1	3.8	3.8	3.8	27.663	263	2	1	0.0032062	3.8	3.8
1220	13142	IPI00025285	NP_004879	ENSG00000136888	ATP6V1G1	ATP6V1G1{ATPase, H+ transporting, lysosomal 13kDa, V1 subunit G1 [Source:HGNC Symbol,Acc:864]}	1	1	1	1	1	1	7.6	7.6	7.6	13.757	118	9	16	7.6502e-08	7.6	7.6
1221	9521	IPI00759799	NP_004861	ENSG00000129255	MPDU1	MPDU1{mannose-P-dolichol utilization defect 1 [Source:HGNC Symbol,Acc:7207]}	1	1	1	1	1	1	3.3	3.3	3.3	32.005	299	7	11	0.00033612	3.3	3.3
1226	4354	IPI00025347					1	1	1	1	1	1	4.5	4.5	4.5	26.72	244	4	2	0.00015178	4.5	4.5
1227	4517	IPI00025357	NP_001497	ENSG00000142511	GPR32	GPR32{G protein-coupled receptor 32 [Source:HGNC Symbol,Acc:4487]}	1	1	1	1	1	1	3.1	3.1	3.1	40.087	356	11	13	3.0789e-08	3.1	3.1
1230	7362;14477	IPI00025489	NP_005897	ENSG00000111837	MAK	MAK{male germ cell-associated kinase [Source:HGNC Symbol,Acc:6816]}	2	1	2	2	1	1	3	1.8	1.8	70.58	623	2	2	1.1856e-05	3	3
1235	19706	IPI00025721	NP_001186054;NP_003644	ENSG00000141030	COPS3	COPS3{COP9 constitutive photomorphogenic homolog subunit 3 (Arabidopsis) [Source:HGNC Symbol,Acc:2239]}	1	1	1	1	1	1	3.8	3.8	3.8	47.873	423	2	1	3.9374e-104	3.8	3.8
1236	12923	IPI00554597	NP_001127757;NP_001429;NP_996317;NP_996318	ENSG00000196482	ESRRG	ESRRG{estrogen-related receptor gamma [Source:HGNC Symbol,Acc:3474]}	1	1	1	1	1	1	1.9	1.9	1.9	52.462	470	6	3	0.00041433	1.9	1.9
1248	15529	IPI00026054	NP_116584;NP_004750	ENSG00000162889	MAPKAPK2	MAPKAPK2{mitogen-activated protein kinase-activated protein kinase 2 [Source:HGNC Symbol,Acc:6887]}	1	1	1	1	1	1	4.2	4.2	4.2	45.567	400	7	2	1.3552e-05	4.2	4.2
1252	10004	IPI00026111	NP_061899	ENSG00000143183	TMCO1	TMCO1{transmembrane and coiled-coil domains 1 [Source:HGNC Symbol,Acc:18188]}	1	1	1	1	1	1	8	8	8	21.175	188	3	3	3.0117e-82	8	8
1263	4776	IPI00026259	NP_000018;NP_001165459	ENSG00000038002	AGA	AGA{aspartylglucosaminidase [Source:HGNC Symbol,Acc:318]}	1	1	1	1	1	1	3.5	3.5	3.5	37.208	346	1	1	7.0723e-25	3.5	3.5
1269	707	IPI00026358	NP_009216	ENSG00000034713	GABARAPL2	GABARAPL2{GABA(A) receptor-associated protein-like 2 [Source:HGNC Symbol,Acc:13291]}	1	1	1	1	1	1	6.8	6.8	6.8	13.667	117	2	2	8.2547e-06	6.8	6.8
1271	13105	IPI00026497	NP_005475;NP_001036083	ENSG00000129484	PARP2	PARP2{poly (ADP-ribose) polymerase 2 [Source:HGNC Symbol,Acc:272]}	1	1	1	1	1	1	2.2	2.2	2.2	66.205	583	2	2	0.00070186	2.2	2.2
1276	6579	IPI00026555	NP_060476	ENSG00000100416	TRMU	TRMU{tRNA 5-methylaminomethyl-2-thiouridylate methyltransferase [Source:HGNC Symbol,Acc:25481]}	1	1	1	1	1	1	2.4	2.4	2.4	47.744	421	5	3	0.0013664	2.4	2.4
1277	8260	IPI00026570	NP_001856	ENSG00000112695	COX7A2	COX7A2{cytochrome c oxidase subunit VIIa polypeptide 2 (liver) [Source:HGNC Symbol,Acc:2288]}	1	1	1	1	1	1	11.3	11.3	11.3	12.844	115	9	15	1.2268e-27	11.3	11.3
1300	1022	IPI00647389	NP_001123543;NP_001123544;NP_037465	ENSG00000063245	EPN1	EPN1{epsin 1 [Source:HGNC Symbol,Acc:21604]}	1	1	1	1	1	1	1.5	1.5	1.5	69.039	662	16	10	1.3847e-11	1.5	1.5
1303	5415;6483;17566	IPI00743713	NP_870986;NP_000289	ENSG00000143627;ENSG00000255961	AL713999.6;PKLR	AL713999.6{pyruvate kinase isozymes R/L isoform 1 [Source:RefSeq peptide,Acc:NP_000289]};PKLR{pyruvate kinase, liver and RBC [Source:HGNC Symbol,Acc:9020]}	3	1	3	3	1	1	4.2	1.3	1.3	64.527	599	3	4	2.0999e-21	4.2	4.2
1309	13129	IPI00027194	NP_058626	ENSG00000168818	STX18	STX18{syntaxin 18 [Source:HGNC Symbol,Acc:15942]}	1	1	1	1	1	1	5.4	5.4	5.4	38.673	335	1	1	1.7779e-08	5.4	5.4
1313	10763	IPI00027235	NP_647537;NP_647538	ENSG00000088812	ATRN	ATRN{attractin [Source:HGNC Symbol,Acc:885]}	1	1	1	1	1	1	0.7	0.7	0.7	158.54	1429	5	8	0.003202	0.7	0.7
1315	5200	IPI00027253	NP_009209	ENSG00000170296	GABARAP	GABARAP{GABA(A) receptor-associated protein [Source:HGNC Symbol,Acc:4067]}	1	1	1	1	1	1	9.4	9.4	9.4	13.918	117	4	3	0.0054772	9.4	9.4
1322	12873	IPI00396563	NP_056937	ENSG00000162191	UBXN1	UBXN1{UBX domain protein 1 [Source:HGNC Symbol,Acc:18402]}	1	1	0	1	0	1	2.6	2.6	2.6	35.107	312		1	0.0038673	0	2.6
1332	8737;19241	IPI00027445	NP_036340	ENSG00000112855	HARS2	HARS2{histidyl-tRNA synthetase 2, mitochondrial (putative) [Source:HGNC Symbol,Acc:4817]}	2	1	2	1	1	0	4.3	2.2	2.2	56.888	506	2		7.5997e-07	4.3	2.2
1342	18977	IPI00027685	NP_001286	ENSG00000163823	CCR1	CCR1{chemokine (C-C motif) receptor 1 [Source:HGNC Symbol,Acc:1602]}	1	1	1	1	1	1	2.5	2.5	2.5	41.172	355	8	7	2.1408e-11	2.5	2.5
1345	19362	IPI00027725	NP_001216;NP_150649;NP_001177945	ENSG00000196954;ENSG00000204403	CASP4;CASP12	CASP4{caspase 4, apoptosis-related cysteine peptidase [Source:HGNC Symbol,Acc:1505]};CASP12{caspase 12 (gene/pseudogene) [Source:HGNC Symbol,Acc:19004]}	1	1	1	1	1	1	2.1	2.1	2.1	43.262	377	3	5	0.0026489	2.1	2.1
1346	17920	IPI00027728	NP_003036	ENSG00000139514	SLC7A1	SLC7A1{solute carrier family 7 (cationic amino acid transporter, y+ system), member 1 [Source:HGNC Symbol,Acc:11057]}	1	1	1	1	1	1	1.7	1.7	1.7	67.638	629	2	10	3.2466e-11	1.7	1.7
1352	18484	IPI00027827	NP_003093	ENSG00000109610	SOD3	SOD3{superoxide dismutase 3, extracellular [Source:HGNC Symbol,Acc:11181]}	1	1	1	1	1	1	4.6	4.6	4.6	25.851	240	4	4	4.2916e-16	4.6	4.6
1357	900;18621	IPI00027993	NP_065120	ENSG00000132698	RAB25	RAB25{RAB25, member RAS oncogene family [Source:HGNC Symbol,Acc:18238]}	2	1	1	2	0	1	8.9	5.2	5.2	23.495	213		1	4.867e-05	3.8	8.9
1358	14627	IPI00985452	NP_001188401;NP_001188408;NP_078811;NP_001188402	ENSG00000103426	CORO7	CORO7{coronin 7 [Source:HGNC Symbol,Acc:26161]}	1	1	1	1	1	1	1.1	1.1	1.1	114.16	1048	1	2	0.00099427	1.1	1.1
1363	7409	IPI00028050	NP_068756	ENSG00000132394	EEFSEC	EEFSEC{eukaryotic elongation factor, selenocysteine-tRNA-specific [Source:HGNC Symbol,Acc:24614]}	1	1	1	1	1	1	2.3	2.3	2.3	65.304	596	6	7	8.7905e-06	2.3	2.3
1365	19514	IPI00028059	NP_001005743;NP_003735;NP_001005744;NP_001005745	ENSG00000133961	NUMB	NUMB{numb homolog (Drosophila) [Source:HGNC Symbol,Acc:8060]}	1	1	1	1	1	1	1.7	1.7	1.7	70.803	651	1	1	0.0040075	1.7	1.7
1366	18439	IPI00028064	NP_001902	ENSG00000100448	CTSG	CTSG{cathepsin G [Source:HGNC Symbol,Acc:2532]}	1	1	1	1	1	1	3.5	3.5	3.5	28.837	255	4	3	0.00018243	3.5	3.5
1373	13901	IPI00745793	NP_114172;NP_004692	ENSG00000134057;ENSG00000157456	CCNB1;CCNB2	CCNB1{cyclin B1 [Source:HGNC Symbol,Acc:1579]};CCNB2{cyclin B2 [Source:HGNC Symbol,Acc:1580]}	1	1	1	1	1	1	1.8	1.8	1.8	48.337	433	6	5	0.0050923	1.8	1.8
1375	8308	IPI00641635	NP_001073901	ENSG00000140718	FTO	FTO{fat mass and obesity associated [Source:HGNC Symbol,Acc:24678]}	1	1	1	1	1	1	1.6	1.6	1.6	64.335	557	7	5	1.0145e-07	1.6	1.6
1377	4642	IPI00028376	NP_001139423;NP_004076	ENSG00000126953	TIMM8A	TIMM8A{translocase of inner mitochondrial membrane 8 homolog A (yeast) [Source:HGNC Symbol,Acc:11817]}	1	1	0	1	0	1	11.3	11.3	11.3	10.998	97		9	3.8562e-16	0	11.3
1382	609;2621;6065;12166;18344	IPI00028564	NP_002044	ENSG00000117228	GBP1	GBP1{guanylate binding protein 1, interferon-inducible [Source:HGNC Symbol,Acc:4182]}	5	1	4	5	0	1	9.5	9.5	1.5	67.93	592	13	18	1.0314e-44	7.9	9.5
1383	609;2284;6065;18344	IPI00028565	NP_004111	ENSG00000162645	GBP2	GBP2{guanylate binding protein 2, interferon-inducible [Source:HGNC Symbol,Acc:4183]}	4	1	3	4	0	1	8	1.4	1.4	67.208	591		1	3.1286e-42	6.6	8
1384	4220	IPI00028618	NP_002403	ENSG00000170430	MGMT	MGMT{O-6-methylguanine-DNA methyltransferase [Source:HGNC Symbol,Acc:7059]}	1	1	0	1	0	1	4.2	4.2	4.2	25.05	238		2	0.0020112	0	4.2
1389	2175;3036;3949;4248;4542;5547;5548;5583;7701;7830;8320;12617;12778;19441	IPI00028888	NP_112738;NP_001003810;NP_002129	ENSG00000138668	HNRNPD	HNRNPD{heterogeneous nuclear ribonucleoprotein D (AU-rich element RNA binding protein 1, 37kDa) [Source:HGNC Symbol,Acc:5036]}	14	1	12	14	1	1	35.8	35.8	5.1	38.434	355	75	112	3.1328e-178	33.8	35.8
1392	16903	IPI00743293	NP_958831;NP_958832;NP_006045	ENSG00000133318	RTN3	RTN3{reticulon 3 [Source:HGNC Symbol,Acc:10469]}	1	1	1	1	1	1	1.1	1.1	1.1	112.61	1032	4	3	4.2947e-07	1.1	1.1
1393	16925	IPI00028955	NP_056016	ENSG00000170727;ENSG00000256388;ENSG00000204775	AC145291.4;BOP1;AC145291.1	AC145291.4{ribosome biogenesis protein BOP1 [Source:RefSeq peptide,Acc:NP_056016]};BOP1{block of proliferation 1 [Source:HGNC Symbol,Acc:15519]};AC145291.1{KM-PA-2 protein [Source:UniProtKB/TrEMBL,Acc:Q96Q25]}	1	1	1	1	1	1	1.5	1.5	1.5	83.629	746	1	1	0.0001229	1.5	1.5
1405	8244;13122	IPI00029111	NP_001184223;NP_001378;NP_001014809;NP_001304;NP_001376	ENSG00000113657;ENSG00000072832;ENSG00000147647	DPYSL3;CRMP1;DPYS	DPYSL3{dihydropyrimidinase-like 3 [Source:HGNC Symbol,Acc:3015]};CRMP1{collapsin response mediator protein 1 [Source:HGNC Symbol,Acc:2365]};DPYS{dihydropyrimidinase [Source:HGNC Symbol,Acc:3013]}	2	1	2	2	1	1	2	1	1	73.91	684	3	4	0.00021895	2	2
1410	10840	IPI00029260	NP_000582;NP_001035110;NP_001167575;NP_001167576	ENSG00000170458	CD14	CD14{CD14 molecule [Source:HGNC Symbol,Acc:1628]}	1	1	0	1	0	1	4.8	4.8	4.8	40.076	375		6	0.00084078	0	4.8
1413	1716;6251;6716	IPI00029267	NP_003083;NP_937863	ENSG00000125870	SNRPB2	SNRPB2{small nuclear ribonucleoprotein polypeptide B [Source:HGNC Symbol,Acc:11155]}	3	1	3	2	1	0	14.7	14.7	8	25.486	225	5	16	5.8433e-45	14.7	6.7
1416	2162	IPI00029447	NP_001007025;NP_004862;NP_001007026	ENSG00000108587	GOSR1	GOSR1{golgi SNAP receptor complex member 1 [Source:HGNC Symbol,Acc:4430]}	1	1	1	1	1	1	4.8	4.8	4.8	28.612	250	3	3	0.00044675	4.8	4.8
1418	11206;19747	IPI00029469	NP_005726	ENSG00000115073	ACTR1B	ACTR1B{ARP1 actin-related protein 1 homolog B, centractin beta (yeast) [Source:HGNC Symbol,Acc:168]}	2	1	2	2	1	1	4.5	2.4	2.4	42.293	376	1	1	7.2741e-08	4.5	4.5
1442	14906	IPI00029773	NP_002899	ENSG00000162924	REL	REL{v-rel reticuloendotheliosis viral oncogene homolog (avian) [Source:HGNC Symbol,Acc:9954]}	1	1	1	1	1	1	1.8	1.8	1.8	68.519	619	9	6	7.4581e-23	1.8	1.8
1443	3534;18019	IPI00923468	NP_001122321;NP_001122316;NP_003063;NP_001122317;NP_001122318;NP_001122319;NP_001122320;NP_003061;NP_620614	ENSG00000127616;ENSG00000080503	SMARCA4;SMARCA2	SMARCA4{SWI/SNF related, matrix associated, actin dependent regulator of chromatin, subfamily a, member 4 [Source:HGNC Symbol,Acc:11100]};SMARCA2{SWI/SNF related, matrix associated, actin dependent regulator of chromatin, subfamily a, member 2 [Source:HGNC Symbol,Acc:11098]}	2	1	2	2	1	1	1.1	1.1	0.6	189.45	1681	8	6	1.0434e-06	1.1	1.1
1450	19933	IPI00030182	NP_000147	ENSG00000130005	GAMT	GAMT{guanidinoacetate N-methyltransferase [Source:HGNC Symbol,Acc:4136]}	1	1	1	1	1	1	5.9	5.9	5.9	26.318	236	3	2	1.7994e-17	5.9	5.9
1458	17513	IPI00030355	NP_068778	ENSG00000204619;ENSG00000206501;ENSG00000227720;ENSG00000233314;ENSG00000234058;ENSG00000236560;ENSG00000237403;ENSG00000237829	PPP1R11	PPP1R11{protein phosphatase 1, regulatory (inhibitor) subunit 11 [Source:HGNC Symbol,Acc:9285]}	1	1	1	1	1	1	11.9	11.9	11.9	13.952	126	1	1	0.0038648	11.9	11.9
1460	4516	IPI00030380	NP_001135779;NP_005307	ENSG00000110768	GTF2H1	GTF2H1{general transcription factor IIH, polypeptide 1, 62kDa [Source:HGNC Symbol,Acc:4655]}	1	1	1	0	1	0	1.6	1.6	1.6	62.031	548	1		0.00093919	1.6	0
1462	13731	IPI00332278	NP_001094284;NP_653169	ENSG00000165782	TMEM55B	TMEM55B{transmembrane protein 55B [Source:HGNC Symbol,Acc:19299]}	1	1	1	1	1	1	3.9	3.9	3.9	30.185	284	2	2	2.946e-05	3.9	3.9
1463	14917	IPI00030634	NP_821158	ENSG00000131067	GGT7	GGT7{gamma-glutamyltransferase 7 [Source:HGNC Symbol,Acc:4259]}	1	1	1	1	1	1	1.8	1.8	1.8	70.466	662	5	3	1.3897e-17	1.8	1.8
1468	14574	IPI00030820	NP_065142;NP_817125	ENSG00000136522	MRPL47	MRPL47{mitochondrial ribosomal protein L47 [Source:HGNC Symbol,Acc:16652]}	1	1	1	1	1	1	4	4	4	29.45	250	6	4	0.004177	4	4
1471	19032	IPI00030877	NP_004252	ENSG00000183291	RP4-604K5.1	RP4-604K5.1{15 kDa selenoprotein [Source:UniProtKB/Swiss-Prot,Acc:O60613]}	1	1	1	1	1	1	7.9	7.9	7.9	18.045	165	6	11	7.17e-28	7.9	7.9
1475	12660	IPI00031030	NP_001633;NP_001135748;NP_001135749;NP_001135750	ENSG00000084234	APLP2	APLP2{amyloid beta (A4) precursor-like protein 2 [Source:HGNC Symbol,Acc:598]}	1	1	1	1	1	1	2.5	2.5	2.5	86.955	763	2	2	4.0911e-06	2.5	2.5
1476	6164	IPI00031064	NP_115649	ENSG00000171202	TMEM126A	TMEM126A{transmembrane protein 126A [Source:HGNC Symbol,Acc:25382]}	1	1	1	1	1	1	4.6	4.6	4.6	21.527	195	14	13	4.76e-17	4.6	4.6
1478	17906	IPI00031106	NP_001127812;NP_115678	ENSG00000157778	PSMG3	PSMG3{proteasome (prosome, macropain) assembly chaperone 3 [Source:HGNC Symbol,Acc:22420]}	1	1	1	1	1	1	12.3	12.3	12.3	13.104	122	1	2	4.6661e-06	12.3	12.3
1486	15037	IPI00031458	NP_036537	ENSG00000116237	ICMT	ICMT{isoprenylcysteine carboxyl methyltransferase [Source:HGNC Symbol,Acc:5350]}	1	1	1	1	1	1	3.5	3.5	3.5	31.938	284	3	2	0.0050655	3.5	3.5
1495	6474;19869	IPI00031549	NP_001932;NP_077741	ENSG00000134762	DSC3	DSC3{desmocollin 3 [Source:HGNC Symbol,Acc:3037]}	2	1	2	2	1	1	3	1.6	1.6	99.968	896	2	2	1.3916e-06	3	3
1499	18380	IPI00031564	NP_076956;NP_001186746	ENSG00000006625	GGCT	GGCT{gamma-glutamylcyclotransferase [Source:HGNC Symbol,Acc:21705]}	1	1	1	1	1	1	5.3	5.3	5.3	21.007	188	3	16	6.5286e-05	5.3	5.3
1503	14002	IPI00102182	NP_001185882;NP_076976	ENSG00000100711	ZFYVE21	ZFYVE21{zinc finger, FYVE domain containing 21 [Source:HGNC Symbol,Acc:20760]}	1	1	1	1	1	1	4.4	4.4	4.4	28.476	252	3	1	0.00045815	4.4	4.4
1507	3628	IPI00031680	NP_115736	ENSG00000135847	ACBD6	ACBD6{acyl-CoA binding domain containing 6 [Source:HGNC Symbol,Acc:23339]}	1	1	1	1	1	1	3.5	3.5	3.5	31.15	282	1	2	0.00011804	3.5	3.5
1509	4635;6540;11698;13085;16558;16661;17387	IPI00031691	NP_000652;NP_001020092	ENSG00000163682	RPL9	RPL9{ribosomal protein L9 [Source:HGNC Symbol,Acc:10369]}	7	1	5	7	1	1	36.5	36.5	9.9	21.863	192	23	44	1.8228e-114	25.5	36.5
1512	15140	IPI00031718	NP_004892;NP_001122402	ENSG00000197217	ENTPD4	ENTPD4{ectonucleoside triphosphate diphosphohydrolase 4 [Source:HGNC Symbol,Acc:14573]}	1	1	1	1	1	1	1.6	1.6	1.6	70.255	616	4	3	0.0042945	1.6	1.6
1513	18769	IPI00031758	NP_005189	ENSG00000100288;ENSG00000254413	CTA-384D8.32;CHKB	CTA-384D8.32{choline/ethanolamine kinase [Source:RefSeq peptide,Acc:NP_005189]};CHKB{choline kinase beta [Source:HGNC Symbol,Acc:1938]}	1	1	1	1	1	1	3.5	3.5	3.5	45.271	395	1	5	1.0531e-41	3.5	3.5
1516	1954;3016;13288	IPI00031801	NP_003642;NP_001138898	ENSG00000060138	CSDA	CSDA{cold shock domain protein A [Source:HGNC Symbol,Acc:2428]}	3	1	1	3	0	1	8.1	4	4	40.089	372		5	1.0974e-10	4	8.1
1524	6909	IPI00031983	NP_055071	ENSG00000179913	B3GNT3	B3GNT3{UDP-GlcNAc:betaGal beta-1,3-N-acetylglucosaminyltransferase 3 [Source:HGNC Symbol,Acc:13528]}	1	1	0	1	0	1	4	4	4	42.534	372		1	8.9389e-06	0	4
1529	19540	IPI00032107	NP_000103	ENSG00000155850	SLC26A2	SLC26A2{solute carrier family 26 (sulfate transporter), member 2 [Source:HGNC Symbol,Acc:10994]}	1	1	1	1	1	1	1.2	1.2	1.2	81.661	739	2	4	0.0017173	1.2	1.2
1541	15741	IPI00032355	NP_001018494;NP_055491	ENSG00000134644	PUM1	PUM1{pumilio homolog 1 (Drosophila) [Source:HGNC Symbol,Acc:14957]}	1	1	1	1	1	1	1.4	1.4	1.4	130.11	1224	1	1	1.7068e-05	1.4	1.4
1545	19902	IPI00032460	NP_067000	ENSG00000172850;ENSG00000204392;ENSG00000224979;ENSG00000225998;ENSG00000231502;ENSG00000236826	LSM2	LSM2{LSM2 homolog, U6 small nuclear RNA associated (S. cerevisiae) [Source:HGNC Symbol,Acc:13940]}	1	1	1	1	1	1	20	20	20	10.834	95	2	7	3.0393e-95	20	20
1547	11679	IPI00909552	NP_570981;NP_115861	ENSG00000240344	PPIL3	PPIL3{peptidylprolyl isomerase (cyclophilin)-like 3 [Source:HGNC Symbol,Acc:9262]}	1	1	1	1	1	1	3.9	3.9	3.9	33.034	282	1	2	1.6906e-08	3.9	3.9
1555	10651	IPI00032827	NP_057131	ENSG00000115128	AC008073.5	AC008073.5{Pre-mRNA branch site protein p14 [Source:UniProtKB/Swiss-Prot,Acc:Q9Y3B4]}	1	1	1	1	1	1	9.6	9.6	9.6	14.585	125	2	2	0.00022827	9.6	9.6
1557	16082	IPI00032831	NP_004773	ENSG00000099940	SNAP29	SNAP29{synaptosomal-associated protein, 29kDa [Source:HGNC Symbol,Acc:11133]}	1	1	1	1	1	1	4.3	4.3	4.3	28.97	258	8	8	3.3473e-23	4.3	4.3
1558	19687	IPI00964448	NP_057475	ENSG00000048162	NOP16	NOP16{NOP16 nucleolar protein homolog (yeast) [Source:HGNC Symbol,Acc:26934]}	1	1	1	0	1	0	4.7	4.7	4.7	27.306	236	1		0.0015223	4.7	0
1560	12786	IPI00032853	NP_061118	ENSG00000182117	NOP10	NOP10{NOP10 ribonucleoprotein homolog (yeast) [Source:HGNC Symbol,Acc:14378]}	1	1	1	1	1	1	20.3	20.3	20.3	7.7059	64	2	2	1.3646e-71	20.3	20.3
1563	1069	IPI00555597	NP_057161	ENSG00000141378	PTRH2	PTRH2{peptidyl-tRNA hydrolase 2 [Source:HGNC Symbol,Acc:24265]}	1	1	1	1	1	1	8.3	8.3	8.3	19.325	180	4	5	8.5181e-24	8.3	8.3
1564	16351	IPI00032905	NP_061138	ENSG00000184056	VPS33B	VPS33B{vacuolar protein sorting 33 homolog B (yeast) [Source:HGNC Symbol,Acc:12712]}	1	1	1	1	1	1	1.9	1.9	1.9	70.584	617	1	1	0.00096132	1.9	1.9
1565	2929	IPI00909113	NP_001124497;NP_001124498;NP_001124495;NP_000310;NP_001124496	ENSG00000139197	PEX5	PEX5{peroxisomal biogenesis factor 5 [Source:HGNC Symbol,Acc:9719]}	1	1	1	1	1	1	2.1	2.1	2.1	73.182	660	2	2	0.0008832	2.1	2.1
1567	8484	IPI00032959	NP_055956	ENSG00000152642	GPD1L	GPD1L{glycerol-3-phosphate dehydrogenase 1-like [Source:HGNC Symbol,Acc:28956]}	1	1	1	0	1	0	3.1	3.1	3.1	38.418	351	1		4.0723e-05	3.1	0
1581	6632	IPI00749454	NP_055965;NP_001003793;NP_001003792;NP_001171183;NP_001171182;NP_055298;NP_002888;NP_058520	ENSG00000131378;ENSG00000144642;ENSG00000153250	RFTN1;RBMS3;RBMS1	RFTN1{raftlin, lipid raft linker 1 [Source:HGNC Symbol,Acc:30278]};RBMS3{RNA binding motif, single stranded interacting protein 3 [Source:HGNC Symbol,Acc:13427]};RBMS1{RNA binding motif, single stranded interacting protein 1 [Source:HGNC Symbol,Acc:9907]}	1	1	0	1	0	1	1.9	1.9	1.9	86.704	792		4	1.5331e-25	0	1.9
1584	11300	IPI00034069	NP_071761	ENSG00000162851	TFB2M	TFB2M{transcription factor B2, mitochondrial [Source:HGNC Symbol,Acc:18559]}	1	1	1	1	1	1	2.3	2.3	2.3	45.348	396	8	6	7.991e-05	2.3	2.3
1587	1247	IPI00034181	NP_006597	ENSG00000089050	RBBP9	RBBP9{retinoblastoma binding protein 9 [Source:HGNC Symbol,Acc:9892]}	1	1	1	1	1	1	7	7	7	21	186	5	3	3.5249e-06	7	7
1588	357;1886	IPI00553214	NP_001172024;NP_113614	ENSG00000126878	AIF1L	AIF1L{allograft inflammatory factor 1-like [Source:HGNC Symbol,Acc:28904]}	2	1	2	2	1	1	8.5	5.1	5.1	20.015	176	1	2	9.5097e-06	8.5	8.5
1590	16920	IPI00034319	NP_001014433;NP_001014837;NP_001014838;NP_057005;NP_001014840	ENSG00000112514;ENSG00000226492	CUTA	CUTA{cutA divalent cation tolerance homolog (E. coli) [Source:HGNC Symbol,Acc:21101]}	1	1	0	1	0	1	7.1	7.1	7.1	20.925	198		4	3.8651e-16	0	7.1
1593	14403	IPI00646086	NP_000991	ENSG00000198918	RPL39	RPL39{ribosomal protein L39 [Source:HGNC Symbol,Acc:10350]}	1	1	1	1	1	1	10.1	10.1	10.1	11.502	99	8	9	3.8209e-15	10.1	10.1
1596	8381	REV__IPI00335589	NP_612427	ENSG00000172366	FAM195A	FAM195A{family with sequence similarity 195, member A [Source:HGNC Symbol,Acc:14142]}	1	1	0	1	0	1	1.4	1.4	1.4	47.019	420		1	8.7569e-35	0	1.4
1599	5280;17672	IPI00044707	NP_075378	ENSG00000187664	HAPLN4	HAPLN4{hyaluronan and proteoglycan link protein 4 [Source:HGNC Symbol,Acc:31357]}	2	1	2	2	1	1	3.7	1.5	1.5	42.801	402	1	1	3.5477e-09	3.7	3.7
1600	17011	IPI00044748	NP_443137;NP_783863;NP_944489	ENSG00000157827;ENSG00000161791	FMNL2;FMNL3	FMNL2{formin-like 2 [Source:HGNC Symbol,Acc:18267]};FMNL3{formin-like 3 [Source:HGNC Symbol,Acc:23698]}	1	1	1	1	1	1	1.2	1.2	1.2	124.22	1093	9	10	1.864e-10	1.2	1.2
1601	5247;19416	IPI00045051	NP_150093	ENSG00000146676	PURB	PURB{purine-rich element binding protein B [Source:HGNC Symbol,Acc:9702]}	2	1	2	1	1	1	3.8	1.9	1.9	33.24	312	2	8	3.8032e-10	3.8	1.9
1603	8777	IPI00045207	NP_443108	ENSG00000160877	NACC1	NACC1{nucleus accumbens associated 1, BEN and BTB (POZ) domain containing [Source:HGNC Symbol,Acc:20967]}	1	1	1	1	1	1	1.5	1.5	1.5	57.258	527	4	4	0.0044607	1.5	1.5
1606	17595	IPI00154915	NP_062565;NP_001171714;NP_001171715;NP_001171716;NP_001171717;NP_001171720;NP_001171721;NP_001171722;NP_001171718;NP_001171723	ENSG00000148498	PARD3	PARD3{par-3 partitioning defective 3 homolog (C. elegans) [Source:HGNC Symbol,Acc:16051]}	1	1	1	1	1	1	0.8	0.8	0.8	151.42	1356	1	3	0.00065123	0.8	0.8
1608	15110	IPI00045550					1	1	0	1	0	1	1.8	1.8	1.8	89.333	817		5	4.6568e-08	0	1.8
1609	3836	IPI00045798	NP_056511	ENSG00000116157	GPX7	GPX7{glutathione peroxidase 7 [Source:HGNC Symbol,Acc:4559]}	1	1	1	1	1	1	4.3	4.3	4.3	20.996	187	2	2	0.0023263	4.3	4.3
1611	423;1339;8139;9647;10843;12291;16232;18318	IPI00045921	NP_114127	ENSG00000160072	ATAD3B	ATAD3B{ATPase family, AAA domain containing 3B [Source:HGNC Symbol,Acc:24007]}	8	1	5	8	1	1	14.4	2.8	2.8	65.115	578	3	4	4.2106e-77	9.2	14.4
1613	1201	IPI00916570	NP_524558	ENSG00000227500	SCAMP4	SCAMP4{secretory carrier membrane protein 4 [Source:HGNC Symbol,Acc:30385]}	1	1	1	1	1	1	4.6	4.6	4.6	26.676	239	1	3	1.0657e-23	4.6	4.6
1618	729	IPI00058344	NP_001009992	ENSG00000179930	ZNF648	ZNF648{zinc finger protein 648 [Source:HGNC Symbol,Acc:18190]}	1	1	1	1	1	1	2.1	2.1	2.1	62.34	568	12	25	0.00046274	2.1	2.1
1619	8204	IPI00059264	NP_443107	ENSG00000151502	VPS26B	VPS26B{vacuolar protein sorting 26 homolog B (S. pombe) [Source:HGNC Symbol,Acc:28119]}	1	1	1	1	1	1	3.9	3.9	3.9	39.154	336	2	2	4.2901e-05	3.9	3.9
1622	2663;6259;7075;11780;18915;19008;19172	IPI00418446	NP_004306;NP_001120977	ENSG00000104763	ASAH1	ASAH1{N-acylsphingosine amidohydrolase (acid ceramidase) 1 [Source:HGNC Symbol,Acc:735]}	7	1	5	6	1	1	13.1	2.4	2.4	46.503	411	8	6	9.9179e-16	9.2	12.7
1626	4975;10198	IPI00472794	NP_620137	ENSG00000157107	FCHO2	FCHO2{FCH domain only 2 [Source:HGNC Symbol,Acc:25180]}	2	1	1	2	1	1	2.3	1.6	1.6	88.923	810	2	1	6.3731e-06	1.6	2.3
1628	15419	IPI00060627	NP_001129675;NP_612451	ENSG00000007080	CCDC124	CCDC124{coiled-coil domain containing 124 [Source:HGNC Symbol,Acc:25171]}	1	1	0	1	0	1	5.8	5.8	5.8	25.835	223		3	0.00052445	0	5.8
1630	2698;5541;5688;8215;17488	IPI00061178	NP_001156008;NP_062556	ENSG00000213516	RBMXL1	RBMXL1{RNA binding motif protein, X-linked-like 1 [Source:HGNC Symbol,Acc:25073]}	5	1	3	5	0	1	16.4	2.8	2.8	42.141	390		3	1.4741e-147	11.8	16.4
1633	18090	IPI00061678	NP_612440	ENSG00000167700	MFSD3	MFSD3{major facilitator superfamily domain containing 3 [Source:HGNC Symbol,Acc:25157]}	1	1	1	1	1	1	2.2	2.2	2.2	42.695	412	3	3	0.0015177	2.2	2.2
1635	18370	IPI00061987		ENSG00000141854	AC022098.1	AC022098.1{Uncharacterized protein LOC113230 [Source:UniProtKB/Swiss-Prot,Acc:Q96FF7]}	1	1	0	1	0	1	4.4	4.4	4.4	39.004	361		2	0.0042042	0	4.4
1636	2004;12629;19710	IPI00062037	NP_542408	ENSG00000121083	DYNLL2	DYNLL2{dynein, light chain, LC8-type 2 [Source:HGNC Symbol,Acc:24596]}	3	1	3	3	1	1	21.3	7.9	7.9	10.35	89	8	9	5.0009e-29	21.3	21.3
1637	10464	IPI00792839	NP_112200	ENSG00000062716	VMP1	VMP1{vacuole membrane protein 1 [Source:HGNC Symbol,Acc:29559]}	1	1	1	0	1	0	7.2	7.2	7.2	47.554	419	1		1.3337e-14	7.2	0
1638	1130	IPI00395926	NP_116188	ENSG00000160446	ZDHHC12	ZDHHC12{zinc finger, DHHC-type containing 12 [Source:HGNC Symbol,Acc:19159]}	1	1	1	1	1	1	4	4	4	36.541	322	2	4	0.00048292	4	4
1639	9889	IPI00063121	NP_542381	ENSG00000134146	ATPBD4	ATPBD4{ATP binding domain 4 [Source:HGNC Symbol,Acc:30543]}	1	1	1	0	1	0	4.5	4.5	4.5	30.306	267	7		6.8556e-05	4.5	0
1644	5910	IPI00063784	NP_006361	ENSG00000100568	VTI1B	VTI1B{vesicle transport through interaction with t-SNAREs homolog 1B (yeast) [Source:HGNC Symbol,Acc:17793]}	1	1	1	1	1	1	5.2	5.2	5.2	26.688	232	1	1	0.0014324	5.2	5.2
1646	501	IPI00063903	NP_001193355;NP_001193356;NP_116136	ENSG00000173915	USMG5	USMG5{up-regulated during skeletal muscle growth 5 homolog (mouse) [Source:HGNC Symbol,Acc:30889]}	1	1	1	1	1	1	25.9	25.9	25.9	6.4575	58	1	2	2.0322e-68	25.9	25.9
1650	8214;9882	IPI00064462	NP_116248;NP_003845	ENSG00000139826;ENSG00000115598	ABHD13;IL1RL2	ABHD13{abhydrolase domain containing 13 [Source:HGNC Symbol,Acc:20293]};IL1RL2{interleukin 1 receptor-like 2 [Source:HGNC Symbol,Acc:5999]}	2	1	2	2	1	1	3.9	3.9	1.8	38.548	337	8	8	0.00059191	3.9	3.9
1651	8985	IPI00786952	NP_444283	ENSG00000159445	THEM4	THEM4{thioesterase superfamily member 4 [Source:HGNC Symbol,Acc:17947]}	1	1	1	1	1	1	3.3	3.3	3.3	27.092	241	2	1	0.00014806	3.3	3.3
1653	5793	IPI00065063	NP_001129522;NP_612461	ENSG00000157379	DHRS1	DHRS1{dehydrogenase/reductase (SDR family) member 1 [Source:HGNC Symbol,Acc:16445]}	1	1	1	1	1	1	3.5	3.5	3.5	33.909	313	3	4	0.00099491	3.5	3.5
1657	5628	IPI00070643	NP_008982	ENSG00000185104	FAF1	FAF1{Fas (TNFRSF6) associated factor 1 [Source:HGNC Symbol,Acc:3578]}	1	1	1	1	1	1	1.2	1.2	1.2	73.953	650	1	1	0.0012434	1.2	1.2
1662	31;92;151;282;669;727;777;823;1204;1813;1955;2128;2484;2521;2689;2690;3541;3546;4148;4202;4333;4372;5287;5440;5444;5618;5726;5981;6214;6659;7592;7623;7919;7945;8357;8811;9324;9336;9477;9519;9764;9874;9880;10030;10294;10406;10528;10683;10891;10896;10901;10943;11114;11404;12281;12387;12393;12461;12619;12988;13235;13236;13407;13408;13491;13524;13615;13660;14042;14100;14211;14254;14259;14291;14449;14…	IPI00072917	NP_476507	ENSG00000163359	COL6A3	COL6A3{collagen, type VI, alpha 3 [Source:HGNC Symbol,Acc:2213]}	118	1	107	117	0	1	44.1	0.4	0.4	322	2977		7	0	41.7	43.4
1664	1543;10271	IPI00798392	NP_001157461;NP_001006639;NP_783865;NP_001157462	ENSG00000172794	RAB37	RAB37{RAB37, member RAS oncogene family [Source:HGNC Symbol,Acc:30268]}	2	1	2	1	1	0	10.1	5.3	5.3	25.663	228	1		3.0866e-17	10.1	4.8
1669	9217	IPI00074605	NP_060767;NP_001138765;NP_001138767	ENSG00000151092	NGLY1	NGLY1{N-glycanase 1 [Source:HGNC Symbol,Acc:17646]}	1	1	1	1	1	1	1.7	1.7	1.7	74.389	654	3	1	0.00045815	1.7	1.7
1675	9406	IPI00090720	NP_060762	ENSG00000130348	QRSL1	QRSL1{glutaminyl-tRNA synthase (glutamine-hydrolyzing)-like 1 [Source:HGNC Symbol,Acc:21020]}	1	1	1	1	1	1	1.9	1.9	1.9	57.46	528	4	2	0.0021978	1.9	1.9
1679	3837	IPI00098827	NP_057210	ENSG00000081870	HSPB11	HSPB11{heat shock protein family B (small), member 11 [Source:HGNC Symbol,Acc:25019]}	1	1	1	1	1	1	7.6	7.6	7.6	16.297	144	1	1	0.0001405	7.6	7.6
1683	993;18088	IPI00100106	NP_068751	ENSG00000177963	RIC8A	RIC8A{resistance to inhibitors of cholinesterase 8 homolog A (C. elegans) [Source:HGNC Symbol,Acc:29550]}	2	1	2	2	1	1	2.6	1.5	1.5	60.372	537	2	4	0.00010016	2.6	2.6
1691	19053	IPI00100668	NP_065995	ENSG00000070610	GBA2	GBA2{glucosidase, beta (bile acid) 2 [Source:HGNC Symbol,Acc:18986]}	1	1	1	1	1	1	1.2	1.2	1.2	105.4	933	3	1	0.00023062	1.2	1.2
1696	6905	IPI00101163	NP_057026	ENSG00000156469	MTERFD1	MTERFD1{MTERF domain containing 1 [Source:HGNC Symbol,Acc:24258]}	1	1	1	1	1	1	2.2	2.2	2.2	47.971	417	2	2	0.0019036	2.2	2.2
1699	2494	IPI00101299	NP_001011551;NP_689905	ENSG00000171155	C1GALT1C1	C1GALT1C1{C1GALT1-specific chaperone 1 [Source:HGNC Symbol,Acc:24338]}	1	1	1	1	1	1	3.1	3.1	3.1	36.382	318	12	8	0.0019563	3.1	3.1
1706	12668	IPI00102313	NP_001030312	ENSG00000213523	SRA1	SRA1{steroid receptor RNA activator 1 [Source:HGNC Symbol,Acc:11281]}	1	1	1	1	1	1	5.1	5.1	5.1	25.843	237	3	2	0.0038309	5.1	5.1
1707	4221	IPI00102580	NP_056273	ENSG00000104643	MTMR9	MTMR9{myotubularin related protein 9 [Source:HGNC Symbol,Acc:14596]}	1	1	1	1	1	1	2.2	2.2	2.2	63.461	549	1	1	0.00036976	2.2	2.2
1711	18075	IPI00102897	NP_776186	ENSG00000144840	RABL3	RABL3{RAB, member of RAS oncogene family-like 3 [Source:HGNC Symbol,Acc:18072]}	1	1	1	1	1	1	4.7	4.7	4.7	26.422	236	1	4	0.0037734	4.7	4.7
1713	7259	IPI00102962	NP_689968	ENSG00000166997	CNPY4	CNPY4{canopy 4 homolog (zebrafish) [Source:HGNC Symbol,Acc:28631]}	1	1	1	1	1	1	4	4	4	28.309	248	1	1	0.0030449	4	4
1714	16638	IPI00290314	NP_064520;NP_569079	ENSG00000124535	WRNIP1	WRNIP1{Werner helicase interacting protein 1 [Source:HGNC Symbol,Acc:20876]}	1	1	1	0	1	0	1.5	1.5	1.5	72.132	665	1		0.0016118	1.5	0
1716	9558	IPI00103057	NP_932342	ENSG00000203667	FAM36A	FAM36A{family with sequence similarity 36, member A [Source:HGNC Symbol,Acc:26970]}	1	1	1	1	1	1	9.2	9.2	9.2	14.669	130	1	2	3.7979e-07	9.2	9.2
1718	6378	IPI00103175	NP_001153244;NP_001153245;NP_620148	ENSG00000171302	CANT1	CANT1{calcium activated nucleotidase 1 [Source:HGNC Symbol,Acc:19721]}	1	1	1	1	1	1	4	4	4	44.839	401	1	1	3.9436e-14	4	4
1719	9939;16288	IPI00103247	NP_612403;NP_001136122	ENSG00000143889	HNRPLL	HNRPLL{heterogeneous nuclear ribonucleoprotein L-like [Source:HGNC Symbol,Acc:25127]}	2	1	2	2	1	1	4.2	3	3	60.082	542	1	2	1.4664e-36	4.2	4.2
1722	424	IPI00103471	NP_536355	ENSG00000198832	RP3-412A9.11	RP3-412A9.11{Selenoprotein M [Source:UniProtKB/Swiss-Prot,Acc:Q8WWX9]}	1	1	1	1	1	1	11	11	11	16.185	145	1	1	3.8033e-19	11	11
1723	9150	IPI00103483	NP_056271	ENSG00000188986	COBRA1	COBRA1{cofactor of BRCA1 [Source:HGNC Symbol,Acc:24324]}	1	1	1	1	1	1	1.4	1.4	1.4	65.697	580	2	1	0.00028616	1.4	1.4
1725	19150	IPI00103536	NP_003673;NP_569829;NP_569826;NP_569832;NP_569831;NP_569827;NP_001129415;NP_569828;NP_001129416;NP_569830	ENSG00000110514	MADD	MADD{MAP-kinase activating death domain [Source:HGNC Symbol,Acc:6766]}	1	1	1	1	1	1	0.7	0.7	0.7	183.3	1647	5	4	0.0058378	0.7	0.7
1726	17084	IPI00103599	NP_542193	ENSG00000184992	BRI3BP	BRI3BP{BRI3 binding protein [Source:HGNC Symbol,Acc:14251]}	1	1	0	1	0	1	7.6	7.6	7.6	27.835	251		1	3.3678e-09	0	7.6
1727	5837	IPI00929734	NP_543012	ENSG00000214014	OVCA2	OVCA2{ovarian tumor suppressor candidate 2 [Source:HGNC Symbol,Acc:24203]}	1	1	1	1	1	1	6	6	6	26.039	249	1	1	5.5925e-24	6	6
1728	55	IPI00103925	NP_001007562	ENSG00000167378	IRGQ	IRGQ{immunity-related GTPase family, Q [Source:HGNC Symbol,Acc:24868]}	1	1	1	1	1	1	2.2	2.2	2.2	62.717	623	1	2	5.3512e-16	2.2	2.2
1729	14626	IPI00963870	NP_001111;NP_001139541	ENSG00000109736	MFSD10	MFSD10{major facilitator superfamily domain containing 10 [Source:HGNC Symbol,Acc:16894]}	1	1	1	1	1	1	2.1	2.1	2.1	50.431	480	3	3	0.0028233	2.1	2.1
1737	18603	IPI00106549	NP_001375	ENSG00000132768	DPH2	DPH2{DPH2 homolog (S. cerevisiae) [Source:HGNC Symbol,Acc:3004]}	1	1	1	1	1	1	3.1	3.1	3.1	52.082	489	3	3	1.0243e-11	3.1	3.1
1741	4347	IPI00106687	NP_064554	ENSG00000079257	LXN	LXN{latexin [Source:HGNC Symbol,Acc:13347]}	1	1	1	1	1	1	4.1	4.1	4.1	25.75	222	2	4	6.165e-06	4.1	4.1
1746	12776	IPI00107122	NP_054808;NP_001008564	ENSG00000139496	NUPL1	NUPL1{nucleoporin like 1 [Source:HGNC Symbol,Acc:20261]}	1	1	1	1	1	1	2.2	2.2	2.2	60.896	599	2	1	1.6824e-10	2.2	2.2
1747	10533	IPI00107339	NP_443730	ENSG00000185838	GNB1L	GNB1L{guanine nucleotide binding protein (G protein), beta polypeptide 1-like [Source:HGNC Symbol,Acc:4397]}	1	1	1	1	1	1	2.8	2.8	2.8	35.618	327	3	4	2.4682e-11	2.8	2.8
1749	8624	IPI00107693	NP_001003891;NP_056973	ENSG00000099917	MED15	MED15{mediator complex subunit 15 [Source:HGNC Symbol,Acc:14248]}	1	1	1	0	1	0	2.3	2.3	2.3	86.753	788	1		0.0011428	2.3	0
1750	9920	IPI00872797	NP_064710	ENSG00000103544	C16orf62	C16orf62{chromosome 16 open reading frame 62 [Source:HGNC Symbol,Acc:24641]}	1	1	1	1	1	1	1.3	1.3	1.3	118.61	1052	4	3	6.7362e-51	1.3	1.3
1753	17713	IPI00140201	NP_115758	ENSG00000213380	COG8	COG8{component of oligomeric golgi complex 8 [Source:HGNC Symbol,Acc:18623]}	1	1	1	1	1	1	1.7	1.7	1.7	71.208	639	16	18	4.4181e-23	1.7	1.7
1764	10575	IPI00149276	NP_004890;NP_954661;NP_954664;NP_954662;NP_954663	ENSG00000158019	BRE	BRE{brain and reproductive organ-expressed (TNFRSF1A modulator) [Source:HGNC Symbol,Acc:1106]}	1	1	1	1	1	1	3.4	3.4	3.4	46.974	415	5	7	4.0882e-24	3.4	3.4
1769	4837	IPI00151462	NP_001078950;NP_073729	ENSG00000171471;ENSG00000140941	MAP1LC3B2;MAP1LC3B	MAP1LC3B2{microtubule-associated protein 1 light chain 3 beta 2 [Source:HGNC Symbol,Acc:34390]};MAP1LC3B{microtubule-associated protein 1 light chain 3 beta [Source:HGNC Symbol,Acc:13352]}	1	1	1	1	1	1	11.2	11.2	11.2	14.628	125	3	5	8.4591e-17	11.2	11.2
1771	16467	IPI00152240	NP_777569	ENSG00000174695	TMEM167A	TMEM167A{transmembrane protein 167A [Source:HGNC Symbol,Acc:28330]}	1	1	1	1	1	1	12.5	12.5	12.5	8.0598	72	3	1	0.005759	12.5	12.5
1773	12640;13909	IPI00647885	NP_000552;NP_666533	ENSG00000134184	GSTM1	GSTM1{glutathione S-transferase mu 1 [Source:HGNC Symbol,Acc:4632]}	2	1	2	2	1	1	9.3	4.2	4.2	27.617	237	3	2	0.00026075	9.3	9.3
1781	3586	IPI00967515	NP_115551	ENSG00000164338	UTP15	UTP15{UTP15, U3 small nucleolar ribonucleoprotein, homolog (S. cerevisiae) [Source:HGNC Symbol,Acc:25758]}	1	1	1	1	1	1	2	2	2	61.32	545	9	4	0.00016177	2	2
1782	16338	IPI00152849	NP_149020	ENSG00000147082	CCNB3	CCNB3{cyclin B3 [Source:HGNC Symbol,Acc:18709]}	1	1	1	0	1	0	0.6	0.6	0.6	157.91	1395	1		0.0054725	0.6	0
1786	10873	IPI00154590	NP_115766	ENSG00000155438	MKI67IP	MKI67IP{MKI67 (FHA domain) interacting nucleolar phosphoprotein [Source:HGNC Symbol,Acc:17838]}	1	1	1	1	1	1	4.8	4.8	4.8	34.222	293	1	1	2.6114e-23	4.8	4.8
1787	7115	IPI00154668	NP_061917	ENSG00000125633	CCDC93	CCDC93{coiled-coil domain containing 93 [Source:HGNC Symbol,Acc:25611]}	1	1	1	1	1	1	2.1	2.1	2.1	73.197	631	1	3	0.00081305	2.1	2.1
1788	16392	IPI00154910	NP_116262	ENSG00000154127	UBASH3B	UBASH3B{ubiquitin associated and SH3 domain containing B [Source:HGNC Symbol,Acc:29884]}	1	1	1	1	1	1	1.5	1.5	1.5	72.695	649	1	1	0.0011139	1.5	1.5
1790	15155	IPI00155601	NP_054786	ENSG00000133315	MACROD1	MACROD1{MACRO domain containing 1 [Source:HGNC Symbol,Acc:29598]}	1	1	1	1	1	1	4.3	4.3	4.3	35.505	325	1	1	0.0001871	4.3	4.3
1801	8471	IPI00915022	NP_001075019	ENSG00000125676	THOC2	THOC2{THO complex 2 [Source:HGNC Symbol,Acc:19073]}	1	1	0	1	0	1	0.6	0.6	0.6	182.77	1593		1	0.0051643	0	0.6
1802	3247;4580;9460;15900;18525	IPI00915400	NP_001157260;NP_001157262;NP_005147	ENSG00000119314	ROD1	ROD1{ROD1 regulator of differentiation 1 (S. pombe) [Source:HGNC Symbol,Acc:10253]}	5	1	5	5	1	1	7.5	2.2	2.2	60.417	558	1	1	5.0056e-17	7.5	7.5
1809	8825;8989;19024	IPI00941170	NP_001138441;NP_001138442;NP_001138443;NP_056092;NP_001138436;NP_001138437;NP_001138438;NP_001138439;NP_001138440	ENSG00000049759	NEDD4L	NEDD4L{neural precursor cell expressed, developmentally down-regulated 4-like [Source:HGNC Symbol,Acc:7728]}	3	1	3	3	1	1	2.6	0.8	0.8	114.54	995	1	2	2.4842e-07	2.6	2.6
1813	16701	IPI00164005	NP_705831	ENSG00000168434	COG7	COG7{component of oligomeric golgi complex 7 [Source:HGNC Symbol,Acc:18622]}	1	1	1	1	1	1	1.3	1.3	1.3	86.343	770	4	3	0.0055777	1.3	1.3
1816	13227	IPI00164366	NP_001137291;NP_060371	ENSG00000186815	TPCN1	TPCN1{two pore segment channel 1 [Source:HGNC Symbol,Acc:18182]}	1	1	1	1	1	1	1.7	1.7	1.7	101.79	888	2	2	1.2075e-11	1.7	1.7
1817	4791;5936;7340;15651	IPI01010660	NP_001129667;NP_038461;NP_001129668	ENSG00000105576	TNPO2	TNPO2{transportin 2 [Source:HGNC Symbol,Acc:19998]}	4	1	3	4	1	1	3	1	1	117.68	1051	3	4	3.0257e-10	2.4	3
1820	6799	IPI00292657	NP_001139580;NP_036344;NP_001139581	ENSG00000106853	PTGR1	PTGR1{prostaglandin reductase 1 [Source:HGNC Symbol,Acc:18429]}	1	1	1	1	1	1	4.3	4.3	4.3	35.869	329	1	1	3.4966e-06	4.3	4.3
1822	11411	IPI00815713	NP_001128715;NP_001128716;NP_001182070;NP_001128717;NP_000347;NP_001008657	ENSG00000070814	TCOF1	TCOF1{Treacher Collins-Franceschetti syndrome 1 [Source:HGNC Symbol,Acc:11654]}	1	1	0	1	0	1	0.7	0.7	0.7	156.06	1525		2	0.0041042	0	0.7
1824	8319	IPI00165230	NP_061832;NP_733829	ENSG00000071626	DAZAP1	DAZAP1{DAZ associated protein 1 [Source:HGNC Symbol,Acc:2683]}	1	1	1	1	1	1	3.9	3.9	3.9	43.383	407	1	1	1.6902e-10	3.9	3.9
1828	15753	IPI00165361	NP_115675	ENSG00000137692	DCUN1D5	DCUN1D5{DCN1, defective in cullin neddylation 1, domain containing 5 (S. cerevisiae) [Source:HGNC Symbol,Acc:28409]}	1	1	1	1	1	1	3.8	3.8	3.8	27.508	237	1	2	0.0021713	3.8	3.8
1829	9598	IPI00165393	NP_001129951;NP_112182	ENSG00000143401	ANP32E	ANP32E{acidic (leucine-rich) nuclear phosphoprotein 32 family, member E [Source:HGNC Symbol,Acc:16673]}	1	1	1	1	1	1	5.2	5.2	5.2	30.692	268	1	3	2.0355e-07	5.2	5.2
1834	7188;8202	IPI00171410	NP_689744	ENSG00000173950	C3orf21	C3orf21{chromosome 3 open reading frame 21 [Source:HGNC Symbol,Acc:26639]}	2	1	2	2	1	1	4.6	4.6	1.8	43.806	393	13	13	0.00022206	4.6	4.6
1836	9368	IPI00165970	NP_073557;NP_001177255	ENSG00000128191	DGCR8	DGCR8{DiGeorge syndrome critical region gene 8 [Source:HGNC Symbol,Acc:2847]}	1	1	1	1	1	1	1.3	1.3	1.3	86.044	773	8	7	0.00011683	1.3	1.3
1837	12891	IPI00165981	NP_066363	ENSG00000124201	ZNFX1	ZNFX1{zinc finger, NFX1-type containing 1 [Source:HGNC Symbol,Acc:29271]}	1	1	1	0	1	0	0.3	0.3	0.3	220.22	1918	1		1.3111e-05	0.3	0
1839	19792	IPI00748891	NP_001072987;NP_775878	ENSG00000151327	FAM177A1	FAM177A1{family with sequence similarity 177, member A1 [Source:HGNC Symbol,Acc:19829]}	1	1	0	1	0	1	4.2	4.2	4.2	26.045	236		2	0.00043539	0	4.2
1840	5598	IPI00166079	NP_775788	ENSG00000196715	VKORC1L1	VKORC1L1{vitamin K epoxide reductase complex, subunit 1-like 1 [Source:HGNC Symbol,Acc:21492]}	1	1	0	1	0	1	6.2	6.2	6.2	19.835	176		4	6.359e-16	0	6.2
1846	708;5802	IPI00166680	NP_722549;NP_001020108;NP_056531;NP_733763	ENSG00000141503	MINK1	MINK1{misshapen-like kinase 1 [Source:HGNC Symbol,Acc:17565]}	2	1	1	2	1	1	1.2	0.7	0.7	149.82	1332	7	2	0.00015454	0.7	1.2
1847	7221;19978	IPI00166729	NP_001176	ENSG00000160862	AZGP1	AZGP1{alpha-2-glycoprotein 1, zinc-binding [Source:HGNC Symbol,Acc:910]}	2	1	2	1	1	1	11.4	11.4	4.4	34.258	298	2	1	5.4881e-45	11.4	4.4
1849	13385	IPI00166785	NP_775741	ENSG00000169446	MMGT1	MMGT1{membrane magnesium transporter 1 [Source:HGNC Symbol,Acc:28100]}	1	1	1	1	1	1	5.6	5.6	5.6	21.881	196	8	3	0.0058649	5.6	5.6
1851	7255	IPI00166873	NP_680544;NP_680545	ENSG00000164967	C9orf23	C9orf23{chromosome 9 open reading frame 23 [Source:HGNC Symbol,Acc:19909]}	1	1	1	1	1	1	6.7	6.7	6.7	17.631	163	4	4	1.1607e-50	6.7	6.7
1855	10051	IPI00719079	NP_872418	ENSG00000177225	PDDC1	PDDC1{Parkinson disease 7 domain containing 1 [Source:HGNC Symbol,Acc:26616]}	1	1	1	1	1	1	4	4	4	26.784	250	5	4	4.2031e-11	4	4
1856	474	IPI00168036	NP_060776	ENSG00000088726	TMEM40	TMEM40{transmembrane protein 40 [Source:HGNC Symbol,Acc:25620]}	1	1	0	1	0	1	4.4	4.4	4.4	26.893	249		3	3.9483e-07	0	4.4
1870	19275	IPI00169400	NP_114108	ENSG00000144029	MRPS5	MRPS5{mitochondrial ribosomal protein S5 [Source:HGNC Symbol,Acc:14498]}	1	1	1	1	1	1	3	3	3	48.006	430	4	4	0.0042058	3	3
1872	7364	IPI00290239	NP_006540;NP_757365;NP_705719;NP_757380;NP_757363;NP_705720;NP_757364	ENSG00000110931	CAMKK2	CAMKK2{calcium/calmodulin-dependent protein kinase kinase 2, beta [Source:HGNC Symbol,Acc:1470]}	1	1	1	1	1	1	1.9	1.9	1.9	64.745	588	7	7	0.00077958	1.9	1.9
1873	371	IPI00170596	NP_001138829;NP_001138830;NP_056292	ENSG00000169375	SIN3A	SIN3A{SIN3 homolog A, transcription regulator (yeast) [Source:HGNC Symbol,Acc:19353]}	1	1	1	1	1	1	0.9	0.9	0.9	145.17	1273	2	1	0.0040075	0.9	0.9
1880	10082	IPI00170972	NP_115683	ENSG00000165118	C9orf64	C9orf64{chromosome 9 open reading frame 64 [Source:HGNC Symbol,Acc:28144]}	1	1	1	1	1	1	3.5	3.5	3.5	39.028	341	5	7	8.7805e-13	3.5	3.5
1896	8304	IPI00171665	NP_076962	ENSG00000075188	NUP37	NUP37{nucleoporin 37kDa [Source:HGNC Symbol,Acc:29929]}	1	1	1	1	1	1	4	4	4	36.707	326	1	2	5.0691e-07	4	4
1898	2252;14019	IPI00171798	NP_004730	ENSG00000149480	MTA2	MTA2{metastasis associated 1 family, member 2 [Source:HGNC Symbol,Acc:7411]}	2	1	2	1	1	0	3	1.9	1.9	75.022	668	2		3.7114e-05	3	1
1901	10948;18575	IPI00172513	NP_060641	ENSG00000136044	APPL2	APPL2{adaptor protein, phosphotyrosine interaction, PH domain and leucine zipper containing 2 [Source:HGNC Symbol,Acc:18242]}	2	1	2	2	1	1	3.1	3.1	2.1	75.184	670	5	6	3.7622e-07	3.1	3.1
1907	1553	IPI00174757	NP_116264;NP_001171835	ENSG00000108306	FBXL20	FBXL20{F-box and leucine-rich repeat protein 20 [Source:HGNC Symbol,Acc:24679]}	1	1	1	1	1	1	3.2	3.2	3.2	48.423	436	2	1	3.5105e-23	3.2	3.2
1909	5419	IPI00174976	NP_071919	ENSG00000072415	MPP5	MPP5{membrane protein, palmitoylated 5 (MAGUK p55 subfamily member 5) [Source:HGNC Symbol,Acc:18669]}	1	1	1	1	1	1	2.8	2.8	2.8	77.293	675	2	2	4.7626e-09	2.8	2.8
1910	9125	IPI00175416	NP_001124432;NP_055811;NP_001124433	ENSG00000114805	PLCH1	PLCH1{phospholipase C, eta 1 [Source:HGNC Symbol,Acc:29185]}	1	1	1	1	1	1	0.5	0.5	0.5	189.22	1693	19	43	6.156e-05	0.5	0.5
1912	8660	IPI00176469	NP_064632	ENSG00000163050	ADCK3	ADCK3{aarF domain containing kinase 3 [Source:HGNC Symbol,Acc:16812]}	1	1	1	1	1	1	1.5	1.5	1.5	71.949	647	2	1	0.0019294	1.5	1.5
1913	18749	IPI00176708	NP_116290	ENSG00000178449	C12orf62	C12orf62{chromosome 12 open reading frame 62 [Source:HGNC Symbol,Acc:28216]}	1	1	1	1	1	1	14	14	14	6.5996	57	3	2	0.0026437	14	14
1916	5203	IPI00177498	NP_055803;NP_001106188;NP_001106189;NP_001106190;NP_001106191	ENSG00000064042	LIMCH1	LIMCH1{LIM and calponin homology domains 1 [Source:HGNC Symbol,Acc:29191]}	1	1	1	1	1	1	0.7	0.7	0.7	164.44	1467	2	2	0.00091854	0.7	0.7
1919	6335	IPI00177912	NP_061855	ENSG00000058799	YIPF1	YIPF1{Yip1 domain family, member 1 [Source:HGNC Symbol,Acc:25231]}	1	1	1	0	1	0	7.9	7.9	7.9	37.067	331	1		1.7628e-27	7.9	0
1923	3383;4042	IPI00178072	NP_001138940;NP_056145	ENSG00000100014	SPECC1L	SPECC1L{sperm antigen with calponin homology and coiled-coil domains 1-like [Source:HGNC Symbol,Acc:29022]}	2	1	1	2	1	1	1.8	1.3	1.3	124.6	1117	2	2	1.7827e-24	1.3	1.8
1927	11171	IPI00790974	NP_001177195;NP_001177196;NP_110430;NP_060444;NP_942593	ENSG00000085978	ATG16L1	ATG16L1{ATG16 autophagy related 16-like 1 (S. cerevisiae) [Source:HGNC Symbol,Acc:21498]}	1	1	1	1	1	1	1.3	1.3	1.3	70.01	624	2	1	0.00024919	1.3	1.3
1928	4758	IPI00178700	NP_005778;NP_001006942	ENSG00000214160	ALG3	ALG3{asparagine-linked glycosylation 3, alpha-1,3- mannosyltransferase homolog (S. cerevisiae) [Source:HGNC Symbol,Acc:23056]}	1	1	1	1	1	1	2.3	2.3	2.3	50.126	438	9	8	0.0027118	2.3	2.3
1930	4155;9780;15513	IPI00480142	NP_003579;NP_001073341	ENSG00000158290	CUL4B	CUL4B{cullin 4B [Source:HGNC Symbol,Acc:2555]}	3	1	3	3	1	1	2.7	1.2	1.2	103.98	913	1	1	6.0841e-06	2.7	2.7
1939	9032;9525;13169	IPI00953576	NP_006539;NP_001007226	ENSG00000073792	IGF2BP2	IGF2BP2{insulin-like growth factor 2 mRNA binding protein 2 [Source:HGNC Symbol,Acc:28867]}	3	1	2	3	0	1	6.6	2.1	2.1	66.785	605		4	6.8651e-36	4.5	6.6
1945	8048	IPI00180384	NP_061720	ENSG00000118997	DNAH7	DNAH7{dynein, axonemal, heavy chain 7 [Source:HGNC Symbol,Acc:18661]}	1	1	0	1	0	1	0.4	0.4	0.4	461.15	4024		2	0.0024777	0	0.4
1946	420;1395;1428;2664;2953;2998;2999;3460;4380;4387;5461;5796;7756;8614;9057;10618;13401;14237;14238;16612;16699;17647;19667	IPI00180675	NP_006000;NP_005992;NP_525125;NP_997195	ENSG00000167552;ENSG00000075886;ENSG00000198033;ENSG00000152086;ENSG00000123416	TUBA1A;TUBA3C;TUBA3D;TUBA3E;TUBA1B	TUBA1A{tubulin, alpha 1a [Source:HGNC Symbol,Acc:20766]};TUBA3C{tubulin, alpha 3c [Source:HGNC Symbol,Acc:12408]};TUBA3D{tubulin, alpha 3d [Source:HGNC Symbol,Acc:24071]};TUBA3E{tubulin, alpha 3e [Source:HGNC Symbol,Acc:20765]};TUBA1B{tubulin, alpha 1b [Source:HGNC Symbol,Acc:18809]}	23	1	23	23	1	1	61.4	6	3.1	50.135	451	14	14	0	61.4	61.4
1949	13837	IPI00439948	NP_001135974;NP_006654	ENSG00000104881	PPP1R13L	PPP1R13L{protein phosphatase 1, regulatory (inhibitor) subunit 13 like [Source:HGNC Symbol,Acc:18838]}	1	1	1	1	1	1	1	1	1	89.09	828	6	6	0.0030352	1	1
1953	4573	IPI00375652	NP_085130	ENSG00000113742	CPEB4	CPEB4{cytoplasmic polyadenylation element binding protein 4 [Source:HGNC Symbol,Acc:21747]}	1	1	1	1	1	1	1.5	1.5	1.5	81.437	741	4	2	0.00099491	1.5	1.5
1955	19980	IPI00218571	NP_000284;NP_001027005	ENSG00000102893	PHKB	PHKB{phosphorylase kinase, beta [Source:HGNC Symbol,Acc:8927]}	1	1	1	1	1	1	1.2	1.2	1.2	124.88	1093	2	2	0.00027739	1.2	1.2
1956	7661	IPI00922153	NP_001001936;NP_115939	ENSG00000169129	AFAP1L2	AFAP1L2{actin filament associated protein 1-like 2 [Source:HGNC Symbol,Acc:25901]}	1	1	1	1	1	1	0.8	0.8	0.8	97.193	872	5	5	0.0018837	0.8	0.8
1966	453	IPI00941721	NP_536859;NP_536858;NP_002822	ENSG00000111679	PTPN6	PTPN6{protein tyrosine phosphatase, non-receptor type 6 [Source:HGNC Symbol,Acc:9658]}	1	1	1	1	1	1	1.9	1.9	1.9	70.289	626	4	2	3.8576e-07	1.9	1.9
1971	10861;12773	IPI00513791	NP_212132;NP_001180465;NP_982272;NP_001177387	ENSG00000116641;ENSG00000107099	DOCK7;DOCK8	DOCK7{dedicator of cytokinesis 7 [Source:HGNC Symbol,Acc:19190]};DOCK8{dedicator of cytokinesis 8 [Source:HGNC Symbol,Acc:19191]}	2	1	1	2	1	1	0.8	0.8	0.3	242.56	2140	5	19	4.0073e-17	0.3	0.8
1972	18271	IPI00968228	NP_067050	ENSG00000198856	OSTC	OSTC{oligosaccharyltransferase complex subunit [Source:HGNC Symbol,Acc:24448]}	1	1	1	1	1	1	7	7	7	19.171	171	10	11	1.0052e-24	7	7
1974	12327	IPI00184180	NP_076933	ENSG00000145882	PCYOX1L	PCYOX1L{prenylcysteine oxidase 1 like [Source:HGNC Symbol,Acc:28477]}	1	1	1	1	1	1	2	2	2	54.646	494	1	1	0.0050655	2	2
1975	16503;19489	IPI00797684	NP_060167;NP_001030087;NP_001116299;NP_001116298;NP_001116297	ENSG00000104413	ESRP1	ESRP1{epithelial splicing regulatory protein 1 [Source:HGNC Symbol,Acc:25966]}	2	1	2	2	1	1	2.8	1.9	1.9	75.585	681	2	1	5.222e-07	2.8	2.8
1979	4870;8445	IPI00184572	NP_006246	ENSG00000027075	PRKCH	PRKCH{protein kinase C, eta [Source:HGNC Symbol,Acc:9403]}	2	1	2	2	1	1	2.5	1.5	1.5	77.828	683	1	1	0.00024155	2.5	2.5
1980	5298;10861	IPI00184772	NP_065863	ENSG00000130158	DOCK6	DOCK6{dedicator of cytokinesis 6 [Source:HGNC Symbol,Acc:19189]}	2	1	1	2	1	1	1.2	0.7	0.7	229.78	2049	5	5	1.3177e-17	0.7	1.2
1982	9158	IPI00184848	NP_003733	ENSG00000073734;ENSG00000256308	ABCB11;AC069137.3	ABCB11{ATP-binding cassette, sub-family B (MDR/TAP), member 11 [Source:HGNC Symbol,Acc:42]};AC069137.3{Sister p-glycoprotein [Source:UniProtKB/TrEMBL,Acc:Q9UIL3]}	1	1	0	1	0	1	1.3	1.3	1.3	146.41	1321		3	8.7786e-30	0	1.3
1986	4924	IPI00185361	NP_065987	ENSG00000111364	DDX55	DDX55{DEAD (Asp-Glu-Ala-Asp) box polypeptide 55 [Source:HGNC Symbol,Acc:20085]}	1	1	1	1	1	1	1.5	1.5	1.5	68.546	600	5	5	9.3763e-06	1.5	1.5
1989	943	IPI00185661	NP_115971	ENSG00000170832	USP32	USP32{ubiquitin specific peptidase 32 [Source:HGNC Symbol,Acc:19143]}	1	1	1	1	1	1	0.9	0.9	0.9	181.65	1604	4	2	0.00069538	0.9	0.9
1990	12375	IPI00185769	NP_001003716	ENSG00000108469	RECQL5	RECQL5{RecQ protein-like 5 [Source:HGNC Symbol,Acc:9950]}	1	1	1	0	1	0	0.9	0.9	0.9	111.46	1018	2		0.0051276	0.9	0
1993	3925;9962;11070;12255;18701	IPI00186581	NP_001017956;NP_001017957	ENSG00000135506	OS9	OS9{osteosarcoma amplified 9, endoplasmic reticulum lectin [Source:HGNC Symbol,Acc:16994]}	5	1	3	5	0	1	12.3	1.8	1.8	69.246	612		4	1.7721e-107	7.5	12.3
1994	19783	IPI00238218	NP_476510;NP_001128686;NP_055591;NP_001128685;NP_476511;NP_631940	ENSG00000139436	GIT2	GIT2{G protein-coupled receptor kinase interacting ArfGAP 2 [Source:HGNC Symbol,Acc:4273]}	1	1	1	1	1	1	1.2	1.2	1.2	84.542	759	7	10	1.0237e-06	1.2	1.2
2002	2;67;270;479;1152;1714;1728;2932;3321;3402;3525;3683;3725;3851;3945;4157;4167;5488;6182;6896;7024;7089;8782;8926;9629;9657;9977;10198;10206;10298;10328;11395;11405;11414;11416;11417;11418;11419;11420;11755;11756;11764;12082;12107;12406;12468;12476;13728;14269;14390;14438;14464;14537;15439;15482;15551;16072;16231;16743;16905;17457;17484;17606	IPI00215743		ENSG00000125844	RRBP1	RRBP1{ribosome binding protein 1 homolog 180kDa (dog) [Source:HGNC Symbol,Acc:10448]}	63	1	52	63	1	1	59.2	1.4	1.4	152.47	1410	3	1	0	53.7	59.2
2005	19640	IPI00215790	NP_000990;NP_001030335	ENSG00000172809	RPL38	RPL38{ribosomal protein L38 [Source:HGNC Symbol,Acc:10349]}	1	1	1	1	1	1	17.1	17.1	17.1	8.2178	70	3	5	1.5553e-06	17.1	17.1
2015	13017	IPI00215928	NP_004335	ENSG00000147400	CETN2	CETN2{centrin, EF-hand protein, 2 [Source:HGNC Symbol,Acc:1867]}	1	1	1	1	1	1	7.6	7.6	7.6	19.738	172	6	2	2.6276e-10	7.6	7.6
2025	15252	IPI00216088	NP_001186652;NP_001869	ENSG00000143320	CRABP2	CRABP2{cellular retinoic acid binding protein 2 [Source:HGNC Symbol,Acc:2339]}	1	1	0	1	0	1	6.5	6.5	6.5	15.693	138		4	1.471e-06	0	6.5
2028	6158;6363	IPI00216159	NP_005101	ENSG00000131459	GFPT2	GFPT2{glutamine-fructose-6-phosphate transaminase 2 [Source:HGNC Symbol,Acc:4242]}	2	1	1	2	0	1	2.6	1.3	1.3	76.93	682		3	0.00012217	1.3	2.6
2029	8658	IPI00216164	NP_001159887;NP_001957	ENSG00000113790	EHHADH	EHHADH{enoyl-CoA, hydratase/3-hydroxyacyl CoA dehydrogenase [Source:HGNC Symbol,Acc:3247]}	1	1	1	1	1	1	1.2	1.2	1.2	79.494	723	4	5	0.00013317	1.2	1.2
2037	16003	IPI00216313	NP_003376	ENSG00000163032	VSNL1	VSNL1{visinin-like 1 [Source:HGNC Symbol,Acc:12722]}	1	1	1	1	1	1	5.2	5.2	5.2	22.142	191	1	3	0.0030428	5.2	5.2
2052	4398	IPI00419678	NP_722523;NP_065201	ENSG00000135317	SNX14	SNX14{sorting nexin 14 [Source:HGNC Symbol,Acc:14977]}	1	1	1	1	1	1	1.2	1.2	1.2	110.18	946	2	2	0.0012032	1.2	1.2
2056	4956	IPI00216737	NP_001035998;NP_694822;NP_116167	ENSG00000170854	MINA	MINA{MYC induced nuclear antigen [Source:HGNC Symbol,Acc:19441]}	1	1	1	0	1	0	2.2	2.2	2.2	52.8	465	1		0.0035665	2.2	0
2057	5867;14200	IPI00216738	NP_001123990;NP_060841	ENSG00000147408	CSGALNACT1	CSGALNACT1{chondroitin sulfate N-acetylgalactosaminyltransferase 1 [Source:HGNC Symbol,Acc:24290]}	2	1	2	2	1	1	2.8	1.7	1.7	61.294	532	9	8	0.00015734	2.8	2.8
2060	136;509;1162;1163;1185;2054;2792;3052;3179;4175;7359;7453;7641;7851;7891;8906;9591;10201;10242;10335;10365;10697;11619;12022;12317;12421;13079;13564;13713;14305;15336;15503;15777;16138;16244;16582;17289;17290	IPI00216952	NP_005563	ENSG00000160789	LMNA	LMNA{lamin A/C [Source:HGNC Symbol,Acc:6636]}	38	1	33	37	1	1	64	4.5	4.5	65.134	572	1	1	0	56.8	59.6
2061	6372;18683	IPI00216999	NP_777573	ENSG00000196943	C14orf21	C14orf21{chromosome 14 open reading frame 21 [Source:HGNC Symbol,Acc:19826]}	2	1	2	1	1	0	3.1	2.2	2.2	69.437	636	2		2.9795e-06	3.1	0.9
2065	3826;15039	IPI00217055	NP_001127890;NP_060662	ENSG00000090530	LEPREL1	LEPREL1{leprecan-like 1 [Source:HGNC Symbol,Acc:19317]}	2	1	0	2	0	1	2.4	1.3	1.3	80.984	708		1	0.00049789	0	2.4
2069	14777	IPI00909626	NP_004598	ENSG00000171530	TBCA	TBCA{tubulin folding cofactor A [Source:HGNC Symbol,Acc:11579]}	1	1	1	1	1	1	8.5	8.5	8.5	15.791	129	2	2	2.3156e-07	8.5	8.5
2074	4268;4663;5498;16896	IPI00217437		ENSG00000128881	TTBK2	TTBK2{tau tubulin kinase 2 [Source:HGNC Symbol,Acc:19141]}	4	1	4	4	1	1	1.8	0.5	0.5	182.46	1649	4	8	2.4972e-17	1.8	1.8
2084	13531;15395	IPI00217536	NP_001028740;NP_001028738;NP_060777	ENSG00000126858	RHOT1	RHOT1{ras homolog gene family, member T1 [Source:HGNC Symbol,Acc:21168]}	2	1	2	2	1	1	3	3	1.4	79.547	691	6	7	1.9268e-08	3	3
2091	15752	IPI00217661	NP_597709	ENSG00000161847	RAVER1	RAVER1{ribonucleoprotein, PTB-binding 1 [Source:HGNC Symbol,Acc:30296]}	1	1	1	1	1	1	2.1	2.1	2.1	79.578	756	4	3	2.9485e-57	2.1	2.1
2092	7941;17880	IPI00217664	NP_570899	ENSG00000166025	AMOTL1	AMOTL1{angiomotin like 1 [Source:HGNC Symbol,Acc:17811]}	2	1	1	2	1	1	2.2	1.6	1.6	106.67	957	1	2	6.0528e-35	1.6	2.2
2095	1442	IPI00217777	NP_008908	ENSG00000089775	ZBTB25	ZBTB25{zinc finger and BTB domain containing 25 [Source:HGNC Symbol,Acc:13112]}	1	1	1	1	1	1	2.5	2.5	2.5	48.99	435	3	3	0.0015223	2.5	2.5
2097	4871	IPI00376221	NP_065960;NP_001171866;NP_001171867;NP_001171868	ENSG00000115109	EPB41L5	EPB41L5{erythrocyte membrane protein band 4.1 like 5 [Source:HGNC Symbol,Acc:19819]}	1	1	1	1	1	1	2	2	2	81.855	733	2	1	3.5889e-12	2	2
2103	10398;11415;13871	IPI00217950	NP_005508	ENSG00000198830	HMGN2	HMGN2{high mobility group nucleosomal binding domain 2 [Source:HGNC Symbol,Acc:4986]}	3	1	3	3	1	1	25.6	11.1	11.1	9.3926	90	1	1	1.6474e-12	25.6	25.6
2107	17924	IPI00217989	NP_851607;NP_065156	ENSG00000000457	SCYL3	SCYL3{SCY1-like 3 (S. cerevisiae) [Source:HGNC Symbol,Acc:19285]}	1	1	1	1	1	1	1.5	1.5	1.5	82.857	742	6	3	3.1316e-05	1.5	1.5
2108	8107	IPI00218086	NP_742034	ENSG00000121039	RDH10	RDH10{retinol dehydrogenase 10 (all-trans) [Source:HGNC Symbol,Acc:19975]}	1	1	1	1	1	1	2.3	2.3	2.3	38.087	341	3	3	0.0054725	2.3	2.3
2115	13451	IPI00218337	NP_001135764;NP_110432	ENSG00000114988	LMAN2L	LMAN2L{lectin, mannose-binding 2-like [Source:HGNC Symbol,Acc:19263]}	1	1	1	1	1	1	3.6	3.6	3.6	40.982	359	2	1	0.00011422	3.6	3.6
2117	420;1396;1428;2664;2953;2998;3460;4380;4387;5461;5796;7756;8614;9431;10618;13401;14237;14238;16612;16699;17647;19667	IPI00218343	NP_116093	ENSG00000167553	TUBA1C	TUBA1C{tubulin, alpha 1c [Source:HGNC Symbol,Acc:20768]}	22	1	21	22	0	1	57	3.8	3.8	49.895	449		6	0	53.2	57
2118	17783;18727	IPI00218371	NP_787082	ENSG00000229937	PRPS1L1	PRPS1L1{phosphoribosyl pyrophosphate synthetase 1-like 1 [Source:HGNC Symbol,Acc:9463]}	2	1	2	1	1	0	9.4	9.4	4.1	34.839	318	3	2	0.00037478	9.4	5.3
2121	4066	IPI00218466	NP_037468	ENSG00000058262	SEC61A1	SEC61A1{Sec61 alpha 1 subunit (S. cerevisiae) [Source:HGNC Symbol,Acc:18276]}	1	1	1	1	1	1	2.1	2.1	2.1	52.949	482	1	5	2.3696e-05	2.1	2.1
2125	1304	IPI00218620	NP_620305	ENSG00000159140	SON	SON{SON DNA binding protein [Source:HGNC Symbol,Acc:11183]}	1	1	1	1	1	1	0.7	0.7	0.7	267.03	2459	1	5	0.0012014	0.7	0.7
2126	1652;2150;3028;7132	IPI00736464	NP_036467	ENSG00000142347	MYO1F	MYO1F{myosin IF [Source:HGNC Symbol,Acc:7600]}	4	1	4	2	1	1	3.9	0.9	0.9	125.18	1105	2	7	2.0515e-27	3.9	1.7
2129	243;776;1374;2279;2428;4698;4699;8915;11507;12024;15139;19323	IPI00218682	NP_000908;NP_001136068	ENSG00000122884	P4HA1	P4HA1{prolyl 4-hydroxylase, alpha polypeptide I [Source:HGNC Symbol,Acc:8546]}	12	1	9	12	0	1	20.2	1.9	1.9	60.966	534		2	3.8125e-49	13.9	20.2
2135	2603;7001;18071	IPI00218736		ENSG00000122133	PAEP	PAEP{progestagen-associated endometrial protein [Source:HGNC Symbol,Acc:8573]}	3	1	2	3	0	1	45.3	45.3	18.6	9.9528	86	19	24	1.6845e-107	26.7	45.3
2153	3596;8924	IPI00219036	NP_085124;NP_803187;NP_001182502	ENSG00000100697	DICER1	DICER1{dicer 1, ribonuclease type III [Source:HGNC Symbol,Acc:17098]}	2	1	1	2	0	1	0.7	0.4	0.4	218.68	1922		6	2.817e-10	0.3	0.7
2154	484;6965;12437;13273	IPI00219037	NP_002096	ENSG00000188486	H2AFX	H2AFX{H2A histone family, member X [Source:HGNC Symbol,Acc:4739]}	4	1	3	4	0	1	22.4	6.3	6.3	15.144	143		10	8.6446e-15	16.1	22.4
2155	19956	IPI00219068	NP_001011713	ENSG00000139977	NAA30	NAA30{N(alpha)-acetyltransferase 30, NatC catalytic subunit [Source:HGNC Symbol,Acc:19844]}	1	1	0	1	0	1	2.8	2.8	2.8	39.319	362		13	0.0018241	0	2.8
2157	10077	IPI00386448	NP_068810;NP_001138610	ENSG00000173039	RELA	RELA{v-rel reticuloendotheliosis viral oncogene homolog A (avian) [Source:HGNC Symbol,Acc:9955]}	1	1	1	1	1	1	2.4	2.4	2.4	60.218	551	1	2	0.00020505	2.4	2.4
2164	7107;18578;19825	IPI00894213	NP_065393;NP_997404;NP_008939	ENSG00000115310	RTN4	RTN4{reticulon 4 [Source:HGNC Symbol,Acc:14085]}	3	1	3	3	1	1	3.7	0.8	0.8	108.45	986	17	17	6.7675e-91	3.7	3.7
2174	8251	IPI00219385	NP_002484	ENSG00000165264	NDUFB6	NDUFB6{NADH dehydrogenase (ubiquinone) 1 beta subcomplex, 6, 17kDa [Source:HGNC Symbol,Acc:7701]}	1	1	1	1	1	1	14.1	14.1	14.1	15.489	128	2	8	5.4152e-14	14.1	14.1
2176	10074	IPI00219434	NP_001073887	ENSG00000116544	DLGAP3	DLGAP3{discs, large (Drosophila) homolog-associated protein 3 [Source:HGNC Symbol,Acc:30368]}	1	1	0	1	0	1	1.1	1.1	1.1	106.04	979		1	0.0012032	0	1.1
2184	2647;3367;4620;8370;17344;18407;19033	IPI00219568	NP_620061	ENSG00000170950	PGK2	PGK2{phosphoglycerate kinase 2 [Source:HGNC Symbol,Acc:8898]}	7	1	6	7	1	1	16.3	1.7	1.7	44.796	417	2	8	1.0245e-148	12	16.3
2193	3622;7513	IPI00219718	NP_002890;NP_001124464;NP_001124465	ENSG00000114115	RBP1	RBP1{retinol binding protein 1, cellular [Source:HGNC Symbol,Acc:9919]}	2	1	2	2	1	1	9.1	6.1	6.1	22.31	197	1	1	1.6084e-09	9.1	9.1
2196	6723	IPI00219772	NP_004137	ENSG00000099795	NDUFB7	NDUFB7{NADH dehydrogenase (ubiquinone) 1 beta subcomplex, 7, 18kDa [Source:HGNC Symbol,Acc:7702]}	1	1	0	1	0	1	6.6	6.6	6.6	16.402	137		1	0.00014939	0	6.6
2197	4824	IPI00219783	NP_003333	ENSG00000132388	UBE2G1	UBE2G1{ubiquitin-conjugating enzyme E2G 1 (UBC7 homolog, yeast) [Source:HGNC Symbol,Acc:12482]}	1	1	1	1	1	1	7.1	7.1	7.1	19.509	170	1	1	0.0056362	7.1	7.1
2198	15567	IPI00219806	NP_002954;NP_789793	ENSG00000143556;ENSG00000184330	S100A7;S100A7A	S100A7{S100 calcium binding protein A7 [Source:HGNC Symbol,Acc:10497]};S100A7A{S100 calcium binding protein A7A [Source:HGNC Symbol,Acc:21657]}	1	1	1	1	1	1	10.9	10.9	10.9	11.471	101	7	5	0.0050246	10.9	10.9
2199	6086	IPI00954568	NP_001161419;NP_005825	ENSG00000126768	TIMM17B	TIMM17B{translocase of inner mitochondrial membrane 17 homolog B (yeast) [Source:HGNC Symbol,Acc:17310]}	1	1	1	1	1	1	9.9	9.9	9.9	23.823	222	2	2	5.972e-31	9.9	9.9
2203	5552	IPI00219871	NP_057284	ENSG00000128534	NAA38	NAA38{N(alpha)-acetyltransferase 38, NatC auxiliary subunit [Source:HGNC Symbol,Acc:20471]}	1	1	1	1	1	1	16.7	16.7	16.7	10.403	96	5	5	1.6048e-103	16.7	16.7
2214	2396;9457;11518	IPI00465299	NP_001035959;NP_001035960;NP_001035961;NP_598408;NP_001035962;NP_005126	ENSG00000140199	SLC12A6	SLC12A6{solute carrier family 12 (potassium/chloride transporters), member 6 [Source:HGNC Symbol,Acc:10914]}	3	1	2	2	1	1	2.4	1	1	127.62	1150	1	2	1.2649e-06	1.7	1.7
2217	2648	IPI00220267	NP_000039;NP_001020114;NP_001020115;NP_001020117	ENSG00000126522	ASL	ASL{argininosuccinate lyase [Source:HGNC Symbol,Acc:746]}	1	1	1	1	1	1	2.6	2.6	2.6	51.657	464	1	1	3.4153e-05	2.6	2.6
2219	1362;1914;2836;2904;3510;5097	IPI00220278	NP_006088;NP_852667	ENSG00000101335	MYL9	MYL9{myosin, light chain 9, regulatory [Source:HGNC Symbol,Acc:15754]}	6	1	4	6	0	1	42.4	6.4	6.4	19.827	172		5	9.9117e-145	32	42.4
2226	1112	IPI00220409	NP_006244	ENSG00000111725	PRKAB1	PRKAB1{protein kinase, AMP-activated, beta 1 non-catalytic subunit [Source:HGNC Symbol,Acc:9378]}	1	1	1	1	1	1	5.9	5.9	5.9	30.382	270	6	7	6.3876e-57	5.9	5.9
2227	14823	IPI01012160	NP_001186904;NP_006285	ENSG00000156467	UQCRB	UQCRB{ubiquinol-cytochrome c reductase binding protein [Source:HGNC Symbol,Acc:12582]}	1	1	1	1	1	1	6.2	6.2	6.2	18.737	161	2	2	0.0055498	6.2	6.2
2232	3539	IPI00332106	NP_065385	ENSG00000163346	PBXIP1	PBXIP1{pre-B-cell leukemia homeobox interacting protein 1 [Source:HGNC Symbol,Acc:21199]}	1	1	1	0	1	0	2.2	2.2	2.2	80.642	731	3		3.6263e-19	2.2	0
2236	2175;3036;3949;4248;4542;5547;5548;5583;7702;7830;8320;12617;12778;19441	IPI00220683	NP_112737;NP_001003810;NP_002129	ENSG00000138668	HNRNPD	HNRNPD{heterogeneous nuclear ribonucleoprotein D (AU-rich element RNA binding protein 1, 37kDa) [Source:HGNC Symbol,Acc:5036]}	14	1	11	14	0	1	36	3.6	3.6	36.272	336		5	1.1763e-172	30.4	36
2237	1348;3166;4472;5763;5764;6408;6886;8703;9537;12514;13190;18062;18236	IPI00939544	NP_000175	ENSG00000196565	HBG2	HBG2{hemoglobin, gamma G [Source:HGNC Symbol,Acc:4832]}	13	1	13	13	1	1	83	8.2	8.2	16.17	147	4	13	0	83	83
2264	536;3594;4499;4942;11685;11718;15993;18773	IPI00641436	NP_056384;NP_001129599	ENSG00000197959	DNM3	DNM3{dynamin 3 [Source:HGNC Symbol,Acc:29125]}	8	1	8	7	1	0	7.9	0.8	0.8	98.247	873	3		1.053e-22	7.9	7.1
2269	5777	IPI00237011	NP_055815	ENSG00000211455	STK38L	STK38L{serine/threonine kinase 38 like [Source:HGNC Symbol,Acc:17848]}	1	1	1	1	1	1	3	3	3	54.002	464	2	3	0.0015659	3	3
2271	2954;4994;5106;7152;9170;10053;11330;15186	IPI00238532		ENSG00000231924	PSG1	PSG1{pregnancy specific beta-1-glycoprotein 1 [Source:HGNC Symbol,Acc:9514]}	8	1	8	8	1	1	26.1	2.5	2.5	36.926	326	8	7	6.6524e-86	26.1	26.1
2278	621	IPI00242630	NP_060272	ENSG00000164818	HEATR2	HEATR2{HEAT repeat containing 2 [Source:HGNC Symbol,Acc:26013]}	1	1	1	1	1	1	1.4	1.4	1.4	93.52	855	8	3	5.7221e-05	1.4	1.4
2279	411;6345;7434	IPI00243221	NP_002516;NP_001095132	ENSG00000078618	NRD1	NRD1{nardilysin (N-arginine dibasic convertase) [Source:HGNC Symbol,Acc:7995]}	3	1	3	3	1	1	2.5	2.5	0.7	139.41	1219	7	9	3.3359e-09	2.5	2.5
2281	5081	IPI00246975	NP_000840	ENSG00000134202	GSTM3	GSTM3{glutathione S-transferase mu 3 (brain) [Source:HGNC Symbol,Acc:4635]}	1	1	1	1	1	1	3.6	3.6	3.6	26.559	225	3	3	7.6841e-05	3.6	3.6
2287	3769	IPI00253036	NP_002405;NP_001116370	ENSG00000002586	CD99	CD99{CD99 molecule [Source:HGNC Symbol,Acc:7082]}	1	1	0	1	0	1	7.6	7.6	7.6	18.848	185		5	1.0842e-40	0	7.6
2288	14572	IPI00253050	NP_001158307;NP_061952	ENSG00000240563	L1TD1	L1TD1{LINE-1 type transposase domain containing 1 [Source:HGNC Symbol,Acc:25595]}	1	1	1	1	1	1	1.2	1.2	1.2	98.848	865	5	3	0.00075014	1.2	1.2
2291	4640;5260;10559;15782	IPI00024062	NP_036288;NP_818932;NP_976217	ENSG00000088367;ENSG00000159023	EPB41L1;EPB41	EPB41L1{erythrocyte membrane protein band 4.1-like 1 [Source:HGNC Symbol,Acc:3378]};EPB41{erythrocyte membrane protein band 4.1 (elliptocytosis 1, RH-linked) [Source:HGNC Symbol,Acc:3377]}	4	1	3	4	1	1	5	3	1.2	98.502	881	3	5	6.6294e-09	3.3	5
2299	9831	IPI00288947	NP_002063	ENSG00000156052	GNAQ	GNAQ{guanine nucleotide binding protein (G protein), q polypeptide [Source:HGNC Symbol,Acc:4390]}	1	1	1	1	1	1	5	5	5	42.142	359	2	2	2.0676e-31	5	5
2307	7004	IPI00289649	NP_001138841;NP_001138843;NP_002820;NP_001138840;NP_001138842;NP_001138844	ENSG00000070159	PTPN3	PTPN3{protein tyrosine phosphatase, non-receptor type 3 [Source:HGNC Symbol,Acc:9655]}	1	1	0	1	0	1	0.9	0.9	0.9	103.99	913		1	0.0027127	0	0.9
2311	5018	IPI00328832	NP_056100;NP_443066	ENSG00000091157	WDR7	WDR7{WD repeat domain 7 [Source:HGNC Symbol,Acc:13490]}	1	1	1	1	1	1	0.7	0.7	0.7	163.81	1490	8	7	0.0047436	0.7	0.7
2314	4384	IPI00790550	NP_004583	ENSG00000061936	SFSWAP	SFSWAP{splicing factor, suppressor of white-apricot homolog (Drosophila) [Source:HGNC Symbol,Acc:10790]}	1	1	1	1	1	1	1	1	1	110.01	1003	1	1	0.0042945	1	1
2316	18188	IPI00290332	NP_078881	ENSG00000071205	ARHGAP10	ARHGAP10{Rho GTPase activating protein 10 [Source:HGNC Symbol,Acc:26099]}	1	1	1	1	1	1	1.3	1.3	1.3	89.374	786	4	3	0.0009071	1.3	1.3
2320	16630	IPI00290555	NP_071343	ENSG00000100439	ABHD4	ABHD4{abhydrolase domain containing 4 [Source:HGNC Symbol,Acc:20154]}	1	1	1	1	1	1	3.5	3.5	3.5	38.794	342	7	6	0.0056362	3.5	3.5
2322	2302	IPI00290652	NP_057662	ENSG00000048649	RSF1	RSF1{remodeling and spacing factor 1 [Source:HGNC Symbol,Acc:18118]}	1	1	1	1	1	1	1.2	1.2	1.2	163.82	1441	1	1	7.1793e-20	1.2	1.2
2323	19037	IPI00290684	NP_009185	ENSG00000039650	PNKP	PNKP{polynucleotide kinase 3'-phosphatase [Source:HGNC Symbol,Acc:9154]}	1	1	1	1	1	1	2.7	2.7	2.7	57.076	521	2	1	0.00047473	2.7	2.7
2326	2344	IPI00290933	NP_001177900;NP_004755	ENSG00000125207	PIWIL1	PIWIL1{piwi-like 1 (Drosophila) [Source:HGNC Symbol,Acc:9007]}	1	1	0	1	0	1	0.8	0.8	0.8	98.602	861		1	2.1734e-06	0	0.8
2334	19859	IPI00291313		ENSG00000167799	NUDT8	NUDT8{nudix (nucleoside diphosphate linked moiety X)-type motif 8 [Source:HGNC Symbol,Acc:8055]}	1	1	1	1	1	1	5.1	5.1	5.1	25.37	236	3	4	6.5937e-07	5.1	5.1
2347	15481	IPI00291783	NP_056280	ENSG00000082516	GEMIN5	GEMIN5{gem (nuclear organelle) associated protein 5 [Source:HGNC Symbol,Acc:20043]}	1	1	1	1	1	1	0.7	0.7	0.7	168.59	1508	3	3	0.0049076	0.7	0.7
2351	510	IPI00737251	NP_001184051;NP_001184052;NP_001184054;NP_001184055;NP_001562	ENSG00000126456	IRF3	IRF3{interferon regulatory factor 3 [Source:HGNC Symbol,Acc:6118]}	1	1	1	1	1	1	2	2	2	49.12	452	6	6	0.0054778	2	2
2357	9655	IPI00291972	NP_116119	ENSG00000130347	RTN4IP1	RTN4IP1{reticulon 4 interacting protein 1 [Source:HGNC Symbol,Acc:18647]}	1	1	1	1	1	1	3	3	3	43.589	396	1	2	0.0050492	3	3
2361	14959	IPI00292092	NP_110434;NP_001020110;NP_001020109	ENSG00000133460;ENSG00000251357	SLC2A11;AP000350.10	SLC2A11{solute carrier family 2 (facilitated glucose transporter), member 11 [Source:HGNC Symbol,Acc:14239]};AP000350.10{}	1	1	1	1	1	1	1.8	1.8	1.8	54.488	503	1	3	0.00019015	1.8	1.8
2364	18762	IPI00292228	NP_063937	ENSG00000105723	GSK3A	GSK3A{glycogen synthase kinase 3 alpha [Source:HGNC Symbol,Acc:4616]}	1	1	1	1	1	1	1.7	1.7	1.7	50.98	483	2	2	0.0016413	1.7	1.7
2365	5129	IPI00292499	NP_057383	ENSG00000187522	HSPA14	HSPA14{heat shock 70kDa protein 14 [Source:HGNC Symbol,Acc:29526]}	1	1	0	1	0	1	2.8	2.8	2.8	54.794	509		4	0.0032902	0	2.8
2367	1827;7403	IPI00791020	NP_443149	ENSG00000144278	GALNT13	GALNT13{UDP-N-acetyl-alpha-D-galactosamine:polypeptide N-acetylgalactosaminyltransferase 13 (GalNAc-T13) [Source:HGNC Symbol,Acc:23242]}	2	1	2	2	1	1	3.9	2.1	2.1	64.624	561	1	3	1.3793e-12	3.9	3.9
2370	8274	IPI00292856	NP_733762	ENSG00000114423	CBLB	CBLB{Cas-Br-M (murine) ecotropic retroviral transforming sequence b [Source:HGNC Symbol,Acc:1542]}	1	1	1	1	1	1	1	1	1	109.45	982	6	6	1.2664e-15	1	1
2375	17218;17905	IPI00293073	NP_284941	ENSG00000171109	MFN1	MFN1{mitofusin 1 [Source:HGNC Symbol,Acc:18262]}	2	1	2	0	1	0	2.6	1.8	1.8	86.993	769	2		2.476e-05	2.6	0
2387	8275	IPI00293350	NP_005990	ENSG00000116918	TSNAX	TSNAX{translin-associated factor X [Source:HGNC Symbol,Acc:12380]}	1	1	1	1	1	1	6.2	6.2	6.2	33.112	290	2	2	0.00089869	6.2	6.2
2390	1701;3789;5004;8228;9170;9231;10044;11330;11490;15185;15797;16754;19465	IPI00293461	NP_002775	ENSG00000183668	PSG9	PSG9{pregnancy specific beta-1-glycoprotein 9 [Source:HGNC Symbol,Acc:9526]}	13	1	13	13	1	1	30.5	30.5	3.8	48.272	426	96	195	5.779e-208	30.5	30.5
2403	9203	IPI00294186	NP_116246;NP_741982	ENSG00000103642	LACTB	LACTB{lactamase, beta [Source:HGNC Symbol,Acc:16468]}	1	1	1	1	1	1	1.8	1.8	1.8	60.693	547	3	1	0.00074865	1.8	1.8
2405	3877;4708	IPI00294386	NP_005370	ENSG00000166866	MYO1A	MYO1A{myosin IA [Source:HGNC Symbol,Acc:7595]}	2	1	0	2	0	1	2.2	0.6	0.6	118.4	1043		1	5.2925e-20	0	2.2
2406	14828	IPI00294395	NP_000057	ENSG00000021852	C8B	C8B{complement component 8, beta polypeptide [Source:HGNC Symbol,Acc:1353]}	1	1	1	1	1	1	2	2	2	67.046	591	2	2	0.00073714	2	2
2408	7468	IPI00374747	NP_862820;NP_001184188;NP_036513	ENSG00000135336	ORC3	ORC3{origin recognition complex, subunit 3 [Source:HGNC Symbol,Acc:8489]}	1	1	0	1	0	1	2.1	2.1	2.1	82.324	712		4	2.5187e-17	0	2.1
2409	12755;16536	IPI00294447	NP_001792	ENSG00000129596	CDO1	CDO1{cysteine dioxygenase, type I [Source:HGNC Symbol,Acc:1795]}	2	1	1	2	0	1	7.5	4	4	22.972	200		1	0.00048042	3.5	7.5
2421	6706	IPI00294839	NP_002309	ENSG00000134013	LOXL2	LOXL2{lysyl oxidase-like 2 [Source:HGNC Symbol,Acc:6666]}	1	1	1	1	1	1	1.3	1.3	1.3	86.724	774	15	9	4.1355e-07	1.3	1.3
2437	10637	IPI00295595	NP_057258	ENSG00000167123	CERCAM	CERCAM{cerebral endothelial cell adhesion molecule [Source:HGNC Symbol,Acc:23723]}	1	1	1	1	1	1	1.7	1.7	1.7	67.591	595	4	6	0.0048901	1.7	1.7
2438	2482	IPI00295618	NP_000433	ENSG00000256277	PECAM1	PECAM1{platelet/endothelial cell adhesion molecule [Source:HGNC Symbol,Acc:8823]}	1	1	0	1	0	1	2.2	2.2	2.2	82.535	738		4	1.4038e-10	0	2.2
2441	10385	IPI00295772	NP_000777;NP_001139624	ENSG00000001630	CYP51A1	CYP51A1{cytochrome P450, family 51, subfamily A, polypeptide 1 [Source:HGNC Symbol,Acc:2649]}	1	1	1	1	1	1	2	2	2	57.278	509	4	3	0.00034706	2	2
2444	16110	IPI00295889	NP_001191128;NP_003126	ENSG00000153037	SRP19	SRP19{signal recognition particle 19kDa [Source:HGNC Symbol,Acc:11300]}	1	1	1	1	1	1	8.3	8.3	8.3	16.156	144	1	2	0.0021271	8.3	8.3
2445	14781	IPI00295940	NP_001186509;NP_056189;NP_001186508	ENSG00000100242	SUN2	SUN2{Sad1 and UNC84 domain containing 2 [Source:HGNC Symbol,Acc:14210]}	1	1	1	0	1	0	2	2	2	83.964	752	1		2.2019e-12	2	0
2449	5327	IPI00296141	NP_037511	ENSG00000176978	DPP7	DPP7{dipeptidyl-peptidase 7 [Source:HGNC Symbol,Acc:14892]}	1	1	1	0	1	0	2	2	2	54.341	492	2		0.00032159	2	0
2454	4319	IPI00296219	NP_037399	ENSG00000135423	GLS2	GLS2{glutaminase 2 (liver, mitochondrial) [Source:HGNC Symbol,Acc:29570]}	1	1	0	1	0	1	1.8	1.8	1.8	66.322	602		3	0.00077958	0	1.8
2458	10748	IPI00296432	NP_060439	ENSG00000163166	IWS1	IWS1{IWS1 homolog (S. cerevisiae) [Source:HGNC Symbol,Acc:25467]}	1	1	1	1	1	1	1.5	1.5	1.5	91.954	819	5	5	3.3282e-07	1.5	1.5
2465	8999	IPI00554705	NP_001012750;NP_001912	ENSG00000129187	DCTD	DCTD{dCMP deaminase [Source:HGNC Symbol,Acc:2710]}	1	1	1	1	1	1	5.8	5.8	5.8	21.014	189	6	5	4.327e-07	5.8	5.8
2471	15938	IPI00297124	NP_002175;NP_001177910;NP_786943	ENSG00000134352	IL6ST	IL6ST{interleukin 6 signal transducer (gp130, oncostatin M receptor) [Source:HGNC Symbol,Acc:6021]}	1	1	1	1	1	1	1.9	1.9	1.9	103.54	918	3	3	1.4158e-13	1.9	1.9
2480	17926	IPI00297626	NP_009200	ENSG00000116266	STXBP3	STXBP3{syntaxin binding protein 3 [Source:HGNC Symbol,Acc:11446]}	1	1	1	1	1	1	1.5	1.5	1.5	67.764	592	2	14	1.0551e-07	1.5	1.5
2483	6264	IPI00297721		ENSG00000178412	AC068473.1	AC068473.1{Uncharacterized protein [Source:UniProtKB/TrEMBL,Acc:E7ER84]}	1	1	1	1	1	1	4.4	4.4	4.4	19.647	180	1	1	0.0054725	4.4	4.4
2489	6219;6368;7107;12197;19825	IPI00298289	NP_722550	ENSG00000115310	RTN4	RTN4{reticulon 4 [Source:HGNC Symbol,Acc:14085]}	5	1	4	5	1	1	23.9	3.8	3.8	40.317	373	1	2	3.8922e-78	14.7	23.9
2495	5665	IPI00298535	NP_001159465;NP_001159466;NP_872375	ENSG00000153982	GDPD1	GDPD1{glycerophosphodiester phosphodiesterase domain containing 1 [Source:HGNC Symbol,Acc:20883]}	1	1	1	1	1	1	6.1	6.1	6.1	36.167	314	1	1	3.3659e-66	6.1	6.1
2498	14584	IPI00298702	NP_036451	ENSG00000141424	SLC39A6	SLC39A6{solute carrier family 39 (zinc transporter), member 6 [Source:HGNC Symbol,Acc:18607]}	1	1	1	1	1	1	1.3	1.3	1.3	85.046	755	5	5	5.5149e-08	1.3	1.3
2501	8063	IPI00298851	NP_001034579;NP_004348;NP_620598;NP_620599	ENSG00000177697	CD151	CD151{CD151 molecule (Raph blood group) [Source:HGNC Symbol,Acc:1630]}	1	1	1	1	1	1	4	4	4	28.295	253	3	3	1.1744e-15	4	4
2503	10996	IPI00298870	NP_003265	ENSG00000160218	TRAPPC10	TRAPPC10{trafficking protein particle complex 10 [Source:HGNC Symbol,Acc:11868]}	1	1	1	1	1	1	1	1	1	142.19	1259	3	6	5.5192e-05	1	1
2504	6015	IPI00298946	NP_006043	ENSG00000157538	DSCR3	DSCR3{Down syndrome critical region gene 3 [Source:HGNC Symbol,Acc:3044]}	1	1	1	1	1	1	4	4	4	33.01	297	8	8	3.0897e-19	4	4
2516	2550	IPI00980584	NP_001007070;NP_001007071;NP_001007068;NP_005616;NP_001007069	ENSG00000137575	SDCBP	SDCBP{syndecan binding protein (syntenin) [Source:HGNC Symbol,Acc:10662]}	1	1	1	1	1	1	3.5	3.5	3.5	34.819	318	1	1	0.00044786	3.5	3.5
2520	14922	IPI00299182	NP_000278	ENSG00000124587	PEX6	PEX6{peroxisomal biogenesis factor 6 [Source:HGNC Symbol,Acc:8859]}	1	1	1	1	1	1	2.1	2.1	2.1	104.06	980	3	2	2.9439e-37	2.1	2.1
2521	13473	IPI00981628	NP_001189476;NP_060843	ENSG00000213463	SYNJ2BP	SYNJ2BP{synaptojanin 2 binding protein [Source:HGNC Symbol,Acc:18955]}	1	1	1	1	1	1	6.3	6.3	6.3	21.334	191	2	2	0.00016999	6.3	6.3
2529	18937	IPI00299512	NP_001035957;NP_000258	ENSG00000196712	NF1	NF1{neurofibromin 1 [Source:HGNC Symbol,Acc:7765]}	1	1	1	0	1	0	0.4	0.4	0.4	319.37	2839	1		0.0015636	0.4	0
2537	5784	IPI00299824	NP_006305	ENSG00000142675	CNKSR1	CNKSR1{connector enhancer of kinase suppressor of Ras 1 [Source:HGNC Symbol,Acc:19700]}	1	1	1	1	1	1	1.1	1.1	1.1	79.705	720	8	7	0.00064122	1.1	1.1
2538	4925	IPI00299884	NP_076999	ENSG00000136982	DSCC1	DSCC1{defective in sister chromatid cohesion 1 homolog (S. cerevisiae) [Source:HGNC Symbol,Acc:24453]}	1	1	1	0	1	0	2	2	2	44.825	393	1		0.0045053	2	0
2542	2954;3789;5004;9170;10034;10522;16595;19465	IPI00300046		ENSG00000204941	PSG5	PSG5{pregnancy specific beta-1-glycoprotein 5 [Source:HGNC Symbol,Acc:9522]}	8	1	8	8	1	1	18	3.7	1.6	48.032	428	5	12	5.8989e-66	18	18
2550	18528	IPI00300333	NP_061961	ENSG00000006712	PAF1	PAF1{Paf1, RNA polymerase II associated factor, homolog (S. cerevisiae) [Source:HGNC Symbol,Acc:25459]}	1	1	1	1	1	1	2.6	2.6	2.6	59.975	531	1	1	0.00083535	2.6	2.6
2553	17862;19013	IPI00300384	NP_001005862;NP_004439	ENSG00000141736	ERBB2	ERBB2{v-erb-b2 erythroblastic leukemia viral oncogene homolog 2, neuro/glioblastoma derived oncogene homolog (avian) [Source:HGNC Symbol,Acc:3430]}	2	1	2	2	1	1	1.7	0.7	0.7	137.91	1255	5	5	1.2918e-29	1.7	1.7
2557	13424	IPI00300659	NP_078805	ENSG00000134371	CDC73	CDC73{cell division cycle 73, Paf1/RNA polymerase II complex component, homolog (S. cerevisiae) [Source:HGNC Symbol,Acc:16783]}	1	1	1	1	1	1	1.9	1.9	1.9	60.576	531	5	1	2.745e-16	1.9	1.9
2567	9182	IPI00647082	NP_060671	ENSG00000107021	TBC1D13	TBC1D13{TBC1 domain family, member 13 [Source:HGNC Symbol,Acc:25571]}	1	1	1	0	1	0	2.5	2.5	2.5	46.553	400	2		0.00097129	2.5	0
2569	1544	IPI00328985	NP_077315;NP_001135822	ENSG00000131652	THOC6	THOC6{THO complex 6 homolog (Drosophila) [Source:HGNC Symbol,Acc:28369]}	1	1	1	0	1	0	2.6	2.6	2.6	37.535	341	1		8.1123e-05	2.6	0
2573	3744	IPI00301323	NP_006764	ENSG00000088205	DDX18	DDX18{DEAD (Asp-Glu-Ala-Asp) box polypeptide 18 [Source:HGNC Symbol,Acc:2741]}	1	1	1	1	1	1	1.9	1.9	1.9	75.406	670	1	3	0.00050723	1.9	1.9
2574	10646	IPI00301346	NP_001154180;NP_060552	ENSG00000013503	POLR3B	POLR3B{polymerase (RNA) III (DNA directed) polypeptide B [Source:HGNC Symbol,Acc:30348]}	1	1	1	1	1	1	1.1	1.1	1.1	127.78	1133	3	5	0.0044614	1.1	1.1
2578	1464	IPI00301421	NP_057562	ENSG00000091732	ZC3HC1	ZC3HC1{zinc finger, C3HC-type containing 1 [Source:HGNC Symbol,Acc:29913]}	1	1	0	1	0	1	2	2	2	55.261	502		4	0.0035665	0	2
2582	6433	IPI00301561	NP_003293	ENSG00000087077	TRIP6	TRIP6{thyroid hormone receptor interactor 6 [Source:HGNC Symbol,Acc:12311]}	1	1	1	0	1	0	3.8	3.8	3.8	50.287	476	1		9.1898e-17	3.8	0
2586	4545	IPI00301961	NP_000430;NP_001171347;NP_001171346	ENSG00000175426	PCSK1	PCSK1{proprotein convertase subtilisin/kexin type 1 [Source:HGNC Symbol,Acc:8743]}	1	1	1	1	1	1	1.2	1.2	1.2	84.151	753	1	6	0.00082992	1.2	1.2
2587	17341	IPI00302176	NP_061856;NP_127460	ENSG00000109534	GAR1	GAR1{GAR1 ribonucleoprotein homolog (yeast) [Source:HGNC Symbol,Acc:14264]}	1	1	1	1	1	1	4.1	4.1	4.1	22.348	217	2	2	3.8858e-06	4.1	4.1
2596	13696	IPI00302850	NP_008869	ENSG00000167088	SNRPD1	SNRPD1{small nuclear ribonucleoprotein D1 polypeptide 16kDa [Source:HGNC Symbol,Acc:11158]}	1	1	1	1	1	1	10.9	10.9	10.9	13.281	119	1	1	0.0017174	10.9	10.9
2599	17859	IPI00917683	NP_001005781;NP_003343	ENSG00000116030	SUMO1	SUMO1{SMT3 suppressor of mif two 3 homolog 1 (S. cerevisiae) [Source:HGNC Symbol,Acc:12502]}	1	1	1	1	1	1	8.2	8.2	8.2	16.645	146	1	3	0.0022335	8.2	8.2
2600	15120	IPI00303120	NP_060743	ENSG00000161558	TMEM143	TMEM143{transmembrane protein 143 [Source:HGNC Symbol,Acc:25603]}	1	1	1	1	1	1	3.1	3.1	3.1	51.714	459	1	2	0.00072719	3.1	3.1
2610	10902	IPI00303753	NP_075565	ENSG00000162377	SELRC1	SELRC1{Sel1 repeat containing 1 [Source:HGNC Symbol,Acc:25716]}	1	1	1	1	1	1	3.9	3.9	3.9	25.709	231	1	1	0.00018243	3.9	3.9
2611	18812	IPI00303832	NP_055953	ENSG00000137815	RTF1	RTF1{Rtf1, Paf1/RNA polymerase II complex component, homolog (S. cerevisiae) [Source:HGNC Symbol,Acc:28996]}	1	1	1	1	1	1	1.3	1.3	1.3	80.313	710	4	3	0.0001161	1.3	1.3
2616	3507	IPI00304189	NP_001008212;NP_001008213;NP_001008214;NP_068815	ENSG00000123240	OPTN	OPTN{optineurin [Source:HGNC Symbol,Acc:17142]}	1	1	1	1	1	1	1.7	1.7	1.7	65.92	577	1	2	0.0033637	1.7	1.7
2618	699	IPI00304264	NP_057125	ENSG00000072849	DERL2	DERL2{Der1-like domain family, member 2 [Source:HGNC Symbol,Acc:17943]}	1	1	1	1	1	1	12.6	12.6	12.6	27.567	239	2	2	7.2822e-19	12.6	12.6
2621	10149	IPI00304409	NP_001035941;NP_055131	ENSG00000153048	CARHSP1	CARHSP1{calcium regulated heat stable protein 1, 24kDa [Source:HGNC Symbol,Acc:17150]}	1	1	1	1	1	1	10.9	10.9	10.9	15.892	147	6	10	4.2379e-45	10.9	10.9
2632	3067	IPI00304866	NP_006282	ENSG00000185215	TNFAIP2	TNFAIP2{tumor necrosis factor, alpha-induced protein 2 [Source:HGNC Symbol,Acc:11895]}	1	1	1	1	1	1	2	2	2	72.66	654	2	3	0.00065956	2	2
2633	5620;10026;10080	IPI00304911	NP_001683	ENSG00000116039	ATP6V1B1	ATP6V1B1{ATPase, H+ transporting, lysosomal 56/58kDa, V1 subunit B1 [Source:HGNC Symbol,Acc:853]}	3	1	3	2	1	0	9.4	2.3	2.3	56.832	513	1		4.6267e-125	9.4	7
2635	5124	IPI00878288	NP_055919	ENSG00000110046	ATG2A	ATG2A{ATG2 autophagy related 2 homolog A (S. cerevisiae) [Source:HGNC Symbol,Acc:29028]}	1	1	1	1	1	1	0.7	0.7	0.7	213.08	1940	1	1	0.00090413	0.7	0.7
2636	8261	IPI00304932	NP_056139	ENSG00000132275	RRP8	RRP8{ribosomal RNA processing 8, methyltransferase, homolog (yeast) [Source:HGNC Symbol,Acc:29030]}	1	1	1	1	1	1	3.1	3.1	3.1	50.714	456	5	2	4.6333e-23	3.1	3.1
2643	6618;15291;17591	IPI00549205	NP_005723	ENSG00000113522	RAD50	RAD50{RAD50 homolog (S. cerevisiae) [Source:HGNC Symbol,Acc:9816]}	3	1	2	3	1	1	2.8	0.8	0.8	154.59	1318	2	1	7.9638e-06	2.1	2.8
2644	5912	IPI00305286	NP_000851	ENSG00000164120	HPGD	HPGD{hydroxyprostaglandin dehydrogenase 15-(NAD) [Source:HGNC Symbol,Acc:5154]}	1	1	1	1	1	1	5.6	5.6	5.6	28.977	266	2	2	3.4806e-12	5.6	5.6
2646	1113	IPI00305304	NP_071358;NP_859530	ENSG00000143418	LASS2	LASS2{LAG1 homolog, ceramide synthase 2 [Source:HGNC Symbol,Acc:14076]}	1	1	1	1	1	1	4.2	4.2	4.2	44.876	380	1	2	1.4531e-07	4.2	4.2
2649	14411	IPI00305545	NP_057300	ENSG00000138231	DBR1	DBR1{debranching enzyme homolog 1 (S. cerevisiae) [Source:HGNC Symbol,Acc:15594]}	1	1	1	1	1	1	2.4	2.4	2.4	61.554	544	3	2	1.5349e-10	2.4	2.4
2652	17382	IPI00305698	NP_000812;NP_001135741	ENSG00000115486	GGCX	GGCX{gamma-glutamyl carboxylase [Source:HGNC Symbol,Acc:4247]}	1	1	1	1	1	1	1.7	1.7	1.7	87.56	758	3	5	9.8852e-05	1.7	1.7
2658	19040	IPI00306280	NP_003668	ENSG00000139726	DENR	DENR{density-regulated protein [Source:HGNC Symbol,Acc:2769]}	1	1	0	1	0	1	8.1	8.1	8.1	22.092	198		4	1.2609e-14	0	8.1
2664	1917	IPI00306382	NP_005689	ENSG00000116521;ENSG00000255954	AL713999.5;SCAMP3	AL713999.5{secretory carrier-associated membrane protein 3 isoform 1 [Source:RefSeq peptide,Acc:NP_005689]};SCAMP3{secretory carrier membrane protein 3 [Source:HGNC Symbol,Acc:10565]}	1	1	1	1	1	1	8.1	8.1	8.1	38.287	347	1	1	9.6372e-06	8.1	8.1
2665	18704	IPI00306419	NP_005759	ENSG00000111684	LPCAT3	LPCAT3{lysophosphatidylcholine acyltransferase 3 [Source:HGNC Symbol,Acc:30244]}	1	1	1	0	1	0	1.8	1.8	1.8	56.034	487	2		5.8572e-06	1.8	0
2672	7423	IPI00556553	NP_004290	ENSG00000131269	ABCB7	ABCB7{ATP-binding cassette, sub-family B (MDR/TAP), member 7 [Source:HGNC Symbol,Acc:48]}	1	1	1	1	1	1	1.3	1.3	1.3	82.768	753	1	1	0.0020118	1.3	1.3
2673	816;5500	IPI00306778	NP_005931	ENSG00000099953	MMP11	MMP11{matrix metallopeptidase 11 (stromelysin 3) [Source:HGNC Symbol,Acc:7157]}	2	1	2	2	1	1	3.5	2	2	54.589	488	5	4	4.259e-06	3.5	3.5
2686	560	IPI00328236	NP_056104	ENSG00000166887	VPS39	VPS39{vacuolar protein sorting 39 homolog (S. cerevisiae) [Source:HGNC Symbol,Acc:20593]}	1	1	0	1	0	1	1.4	1.4	1.4	101.81	886		3	1.1251e-09	0	1.4
2689	18205	IPI00328293	NP_005830	ENSG00000133226	SRRM1	SRRM1{serine/arginine repetitive matrix 1 [Source:HGNC Symbol,Acc:16638]}	1	1	1	1	1	1	1.3	1.3	1.3	103.8	916	3	3	7.0551e-08	1.3	1.3
2692	4274;10003	IPI00398845	NP_001005333;NP_001005332;NP_008917	ENSG00000179222	MAGED1	MAGED1{melanoma antigen family D, 1 [Source:HGNC Symbol,Acc:6813]}	2	1	1	2	1	1	2.4	1	1	91.957	834	3	2	2.7225e-10	1	2.4
2695	5767	IPI00328488	NP_056089	ENSG00000013288	MAN2B2	MAN2B2{mannosidase, alpha, class 2B, member 2 [Source:HGNC Symbol,Acc:29623]}	1	1	1	1	1	1	1.6	1.6	1.6	113.98	1009	2	3	1.6541e-10	1.6	1.6
2702	10490	IPI00328879	NP_848509	ENSG00000182749	PAQR7	PAQR7{progestin and adipoQ receptor family member VII [Source:HGNC Symbol,Acc:23146]}	1	1	1	1	1	1	2.6	2.6	2.6	39.719	346	7	6	0.00013317	2.6	2.6
2704	3962	IPI00328970	NP_789791	ENSG00000182261	NLRP10	NLRP10{NLR family, pyrin domain containing 10 [Source:HGNC Symbol,Acc:21464]}	1	1	1	1	1	1	1.4	1.4	1.4	75.031	655	9	5	0.0024606	1.4	1.4
2706	12943	IPI00329002	NP_835224	ENSG00000187231	SESTD1	SESTD1{SEC14 and spectrin domains 1 [Source:HGNC Symbol,Acc:18379]}	1	1	1	1	1	1	1.3	1.3	1.3	79.347	696	7	5	5.2926e-17	1.3	1.3
2707	8858	IPI00387005	NP_115881	ENSG00000171135	JAGN1	JAGN1{jagunal homolog 1 (Drosophila) [Source:HGNC Symbol,Acc:26926]}	1	1	1	1	1	1	6.6	6.6	6.6	21.371	183	2	5	6.7538e-05	6.6	6.6
2708	5988	IPI00329088	NP_004275	ENSG00000131778	CHD1L	CHD1L{chromodomain helicase DNA binding protein 1-like [Source:HGNC Symbol,Acc:1916]}	1	1	1	1	1	1	1.2	1.2	1.2	100.98	897	4	4	3.5822e-07	1.2	1.2
2710	578	IPI00329142	NP_997215	ENSG00000104714	ERICH1	ERICH1{glutamate-rich 1 [Source:HGNC Symbol,Acc:27234]}	1	1	1	1	1	1	2	2	2	48.984	443	3	3	0.0012049	2	2
2714	9792	IPI00513853	NP_803173	ENSG00000117758	STX12	STX12{syntaxin 12 [Source:HGNC Symbol,Acc:11430]}	1	1	1	0	1	0	5.7	5.7	5.7	34.201	299	3		9.0373e-15	5.7	0
2715	13253	IPI00924713	NP_005008	ENSG00000161217	PCYT1A	PCYT1A{phosphate cytidylyltransferase 1, choline, alpha [Source:HGNC Symbol,Acc:8754]}	1	1	0	1	0	1	3.9	3.9	3.9	43.263	380		1	1.7261e-11	0	3.9
2718	410	IPI00329482	NP_001098676;NP_001098677;NP_002281	ENSG00000112769	LAMA4	LAMA4{laminin, alpha 4 [Source:HGNC Symbol,Acc:6484]}	1	1	1	1	1	1	0.5	0.5	0.5	202.52	1823	1	3	0.00075502	0.5	0.5
2723	3141	IPI00329596	NP_057043;NP_001137484	ENSG00000213593	TMX2	TMX2{thioredoxin-related transmembrane protein 2 [Source:HGNC Symbol,Acc:30739]}	1	1	1	1	1	1	2.7	2.7	2.7	42.471	371	1	1	5.8199e-05	2.7	2.7
2724	9763	IPI00329598	NP_057329	ENSG00000198189	HSD17B11	HSD17B11{hydroxysteroid (17-beta) dehydrogenase 11 [Source:HGNC Symbol,Acc:22960]}	1	1	0	1	0	1	3.3	3.3	3.3	32.935	300		1	0.0054433	0	3.3
2726	4614	IPI00329605	NP_002430	ENSG00000113318	MSH3	MSH3{mutS homolog 3 (E. coli) [Source:HGNC Symbol,Acc:7326]}	1	1	1	1	1	1	1	1	1	127.41	1137	1	1	0.0058621	1	1
2727	1486	IPI00329629	NP_001138238;NP_003306	ENSG00000168259;ENSG00000258041	AC105024.5;DNAJC7	AC105024.5{dnaJ homolog subfamily C member 7 isoform 1 [Source:RefSeq peptide,Acc:NP_003306]};DNAJC7{DnaJ (Hsp40) homolog, subfamily C, member 7 [Source:HGNC Symbol,Acc:12392]}	1	1	1	1	1	1	2	2	2	56.44	494	8	12	1.2664e-15	2	2
2731	19669	IPI00329685	NP_000478;NP_001078894;NP_001078895;NP_001078896;NP_001078897	ENSG00000100299	ARSA	ARSA{arylsulfatase A [Source:HGNC Symbol,Acc:713]}	1	1	1	1	1	1	2.8	2.8	2.8	53.806	509	1	2	0.0004061	2.8	2.8
2732	11338	IPI00329696	NP_057117	ENSG00000176623	FAM82B	FAM82B{family with sequence similarity 82, member B [Source:HGNC Symbol,Acc:24285]}	1	1	1	1	1	1	2.9	2.9	2.9	35.808	314	5	3	1.9713e-09	2.9	2.9
2734	3925;9962;11070;12254;18701	IPI00922878	NP_006803;NP_001017958	ENSG00000135506	OS9	OS9{osteosarcoma amplified 9, endoplasmic reticulum lectin [Source:HGNC Symbol,Acc:16994]}	5	1	4	5	1	1	10.8	10.8	2.2	83.568	740	6	14	2.6929e-114	8.4	10.8
2735	12762	IPI00939523	NP_055644	ENSG00000145833	DDX46	DDX46{DEAD (Asp-Glu-Ala-Asp) box polypeptide 46 [Source:HGNC Symbol,Acc:18681]}	1	1	1	1	1	1	1.2	1.2	1.2	117.46	1032	4	4	3.514e-13	1.2	1.2
2737	6987	IPI00478496	NP_006629	ENSG00000124787	RPP40	RPP40{ribonuclease P/MRP 40kDa subunit [Source:HGNC Symbol,Acc:20992]}	1	1	1	1	1	1	3	3	3	41.833	363	3	4	0.00011077	3	3
2740	15941	IPI00332493	NP_001181988;NP_079477	ENSG00000241839;ENSG00000249240	PLEKHO2;AC069368.3	PLEKHO2{pleckstrin homology domain containing, family O member 2 [Source:HGNC Symbol,Acc:30026]};AC069368.3{Uncharacterized protein [Source:UniProtKB/TrEMBL,Acc:C9J4A7]}	1	1	1	1	1	1	2	2	2	53.349	490	8	10	0.00059207	2	2
2745	8955	IPI00333410	NP_060052	ENSG00000160714	UBE2Q1	UBE2Q1{ubiquitin-conjugating enzyme E2Q family member 1 [Source:HGNC Symbol,Acc:15698]}	1	1	1	1	1	1	1.9	1.9	1.9	46.126	422	2	2	0.00064122	1.9	1.9
2762	2080;4270;9163	IPI00337415	NP_002060	ENSG00000127955	GNAI1	GNAI1{guanine nucleotide binding protein (G protein), alpha inhibiting activity polypeptide 1 [Source:HGNC Symbol,Acc:4384]}	3	1	2	3	1	1	9.6	4.8	4.8	40.361	354	1	3	4.4238e-60	7.9	9.6
2768	1305;4430;9271;9345;10761;13164;16022;17015;17472	IPI00339269	NP_002146	ENSG00000173110	HSPA6	HSPA6{heat shock 70kDa protein 6 (HSP70B') [Source:HGNC Symbol,Acc:5239]}	9	1	9	8	1	0	15.4	1.4	1.4	71.027	643	2		3.6997e-156	15.4	14
2769	1273;4357	IPI00339320	NP_055973;NP_694856	ENSG00000107104	KANK1	KANK1{KN motif and ankyrin repeat domains 1 [Source:HGNC Symbol,Acc:19309]}	2	1	2	2	1	1	2.1	0.9	0.9	147.29	1352	2	2	4.9427e-11	2.1	2.1
2772	9359	IPI00373894	NP_055495	ENSG00000007202	KIAA0100	KIAA0100{KIAA0100 [Source:HGNC Symbol,Acc:28960]}	1	1	1	1	1	1	0.4	0.4	0.4	253.7	2235	2	2	0.0054725	0.4	0.4
2775	14274	IPI00374272	NP_787117	ENSG00000205765	C5orf51	C5orf51{chromosome 5 open reading frame 51 [Source:HGNC Symbol,Acc:27750]}	1	1	1	1	1	1	3.1	3.1	3.1	33.62	294	6	7	5.2984e-14	3.1	3.1
2777	7913	IPI00374574	NP_001129114;NP_057616;NP_570122	ENSG00000132376	INPP5K	INPP5K{inositol polyphosphate-5-phosphatase K [Source:HGNC Symbol,Acc:33882]}	1	1	1	1	1	1	2.2	2.2	2.2	51.09	448	2	3	0.00074865	2.2	2.2
2779	17695	IPI00438923	NP_665857	ENSG00000205758	CRYZL1	CRYZL1{crystallin, zeta (quinone reductase)-like 1 [Source:HGNC Symbol,Acc:2420]}	1	1	1	0	1	0	3.4	3.4	3.4	38.696	349	1		0.001087	3.4	0
2780	9717	IPI00412441	NP_055860	ENSG00000062650	WAPAL	WAPAL{wings apart-like homolog (Drosophila) [Source:HGNC Symbol,Acc:23293]}	1	1	0	1	0	1	0.9	0.9	0.9	142.52	1275		5	0.002387	0	0.9
2786	9342;12470	IPI00376119	NP_891993;NP_002722;NP_002723;NP_997461	ENSG00000142875;ENSG00000165059	PRKACB;PRKACG	PRKACB{protein kinase, cAMP-dependent, catalytic, beta [Source:HGNC Symbol,Acc:9381]};PRKACG{protein kinase, cAMP-dependent, catalytic, gamma [Source:HGNC Symbol,Acc:9382]}	2	1	2	2	1	1	5.3	3	3	46.235	398	6	4	2.6786e-11	5.3	5.3
2788	4752	IPI00376259	NP_065813	ENSG00000196935	SRGAP1	SRGAP1{SLIT-ROBO Rho GTPase activating protein 1 [Source:HGNC Symbol,Acc:17382]}	1	1	1	0	1	0	1.3	1.3	1.3	124.26	1085	2		5.5251e-07	1.3	0
2793	4323;15065;16911;19979	IPI00377045	NP_937762;NP_001121189;NP_001121190;NP_000218	ENSG00000053747	LAMA3	LAMA3{laminin, alpha 3 [Source:HGNC Symbol,Acc:6483]}	4	1	4	3	1	0	0.8	0.2	0.2	372.74	3388	1		2.7568e-07	0.8	0.6
2795	19611	IPI00976652	NP_001171564;NP_005495;NP_001171565;NP_001171562;NP_001171563	ENSG00000060982	BCAT1	BCAT1{branched chain amino-acid transaminase 1, cytosolic [Source:HGNC Symbol,Acc:976]}	1	1	1	1	1	1	3.8	3.8	3.8	44.131	398	3	9	5.2903e-17	3.8	3.8
2797	1684;12839;18096	IPI00382605	NP_001003828	ENSG00000188677	PARVB	PARVB{parvin, beta [Source:HGNC Symbol,Acc:14653]}	3	1	2	3	0	1	6.8	1.5	1.5	45.182	397		1	1.0752e-08	5.3	6.8
2802	289;347;754;1730;1802;1901;1942;2420;2641;3228;3840;4533;5933;6855;7727;7774;9209;10460;10879;12110;12996;13442;13639;14579;14688;15358;15643;17940;18256;18430;18479;18618;18619;19166;19357	IPI00383581	NP_938148	ENSG00000089597	GANAB	GANAB{glucosidase, alpha, neutral AB [Source:HGNC Symbol,Acc:4138]}	35	1	34	33	1	1	41.3	2.1	2.1	112.92	995	2	12	0	40.6	37.6
2803	9044	IPI00878754	NP_060392	ENSG00000185246	PRPF39	PRPF39{PRP39 pre-mRNA processing factor 39 homolog (S. cerevisiae) [Source:HGNC Symbol,Acc:20314]}	1	1	1	1	1	1	2.2	2.2	2.2	78.429	669	2	1	0.00011729	2.2	2.2
2804	15166	IPI00384028	NP_116021	ENSG00000090060	PAPOLA	PAPOLA{poly(A) polymerase alpha [Source:HGNC Symbol,Acc:14981]}	1	1	1	1	1	1	1.3	1.3	1.3	84.55	761	2	2	0.00057174	1.3	1.3
2805	2510	IPI00655885	NP_001008744;NP_060789	ENSG00000042088	TDP1	TDP1{tyrosyl-DNA phosphodiesterase 1 [Source:HGNC Symbol,Acc:18884]}	1	1	1	1	1	1	2	2	2	68.42	608	3	2	0.0031443	2	2
2806	4183	IPI00384187	NP_663786;NP_061979	ENSG00000100167	3-Sep	SEPT3{septin 3 [Source:HGNC Symbol,Acc:10750]}	1	1	1	1	1	1	3.4	3.4	3.4	40.703	358	2	5	6.5937e-07	3.4	3.4
2813	17992	IPI00642271	NP_835361	ENSG00000157593	SLC35B2	SLC35B2{solute carrier family 35, member B2 [Source:HGNC Symbol,Acc:16872]}	1	1	1	1	1	1	2.1	2.1	2.1	47.514	432	1	1	0.001038	2.1	2.1
2814	6827	IPI00384887					1	1	1	1	1	1	13	13	13	12.393	108	5	7	0.0058088	13	13
2815	11892	IPI00384947	NP_060403;NP_001094288	ENSG00000153823	PID1	PID1{phosphotyrosine interaction domain containing 1 [Source:HGNC Symbol,Acc:26084]}	1	1	1	1	1	1	4.4	4.4	4.4	28.271	250	4	2	0.00070947	4.4	4.4
2817	5020;8944;11482;14031;14371;18820	IPI00385055	NP_004380;NP_001158355	ENSG00000066032	CTNNA2	CTNNA2{catenin (cadherin-associated protein), alpha 2 [Source:HGNC Symbol,Acc:2510]}	6	1	4	6	1	1	7.2	1.9	1.9	105.31	953	1	3	3.0414e-38	4.9	7.2
2820	4262	IPI00514277	NP_006766;NP_996736;NP_996737;NP_996735	ENSG00000112531	QKI	QKI{quaking homolog, KH domain RNA binding (mouse) [Source:HGNC Symbol,Acc:21100]}	1	1	0	1	0	1	2.9	2.9	2.9	37.67	341		2	0.0038978	0	2.9
2826	12850	IPI00386258	NP_055156	ENSG00000137409	MTCH1	MTCH1{mitochondrial carrier homolog 1 (C. elegans) [Source:HGNC Symbol,Acc:17586]}	1	1	1	1	1	1	3.1	3.1	3.1	41.544	389	10	5	0.0013057	3.1	3.1
2830	12170	IPI00794252	NP_001128573;NP_077300	ENSG00000184164	CRELD2	CRELD2{cysteine-rich with EGF-like domains 2 [Source:HGNC Symbol,Acc:28150]}	1	1	1	1	1	1	3.2	3.2	3.2	43.578	402	1	2	8.5158e-16	3.2	3.2
2832	9274;12905	IPI00386856					2	1	1	1	1	0	10.4	10.4	10.4	7.8814	67	2		0.00080073	10.4	9
2833	19467	IPI00387077	NP_064631	ENSG00000146828	SLC12A9	SLC12A9{solute carrier family 12 (potassium/chloride transporters), member 9 [Source:HGNC Symbol,Acc:17435]}	1	1	1	1	1	1	1.1	1.1	1.1	96.109	914	5	4	2.3696e-05	1.1	1.1
2834	9147	IPI00394679	NP_005654	ENSG00000185049	WHSC2	WHSC2{Wolf-Hirschhorn syndrome candidate 2 [Source:HGNC Symbol,Acc:12768]}	1	1	1	1	1	1	1.9	1.9	1.9	58.499	539	7	7	1.3258e-11	1.9	1.9
2837	542	IPI00394818	NP_940873	ENSG00000186994	KANK3	KANK3{KN motif and ankyrin repeat domains 3 [Source:HGNC Symbol,Acc:24796]}	1	1	1	1	1	1	1.8	1.8	1.8	88.424	840	5	3	6.8287e-05	1.8	1.8
2839	11580	IPI00395462	NP_057484	ENSG00000242028	C15orf63	C15orf63{chromosome 15 open reading frame 63 [Source:HGNC Symbol,Acc:18418]}	1	1	1	1	1	1	11.6	11.6	11.6	14.665	129	3	2	0.0022519	11.6	11.6
2849	7045	IPI00790411	NP_056257	ENSG00000182973	CNOT10	CNOT10{CCR4-NOT transcription complex, subunit 10 [Source:HGNC Symbol,Acc:23817]}	1	1	1	1	1	1	1.1	1.1	1.1	89.142	804	6	5	5.5434e-08	1.1	1.1
2855	14640	IPI00761017	NP_001035919;NP_001158191;NP_057011	ENSG00000140682	TGFB1I1	TGFB1I1{transforming growth factor beta 1 induced transcript 1 [Source:HGNC Symbol,Acc:11767]}	1	1	1	1	1	1	2.2	2.2	2.2	49.814	461	14	11	1.6898e-22	2.2	2.2
2862	7822	IPI00397732					1	1	1	0	1	0	2.3	2.3	2.3	54.384	483	2		0.0033611	2.3	0
2864	292;325;488;517;534;544;839;969;1128;1135;1137;1156;1169;1203;1502;1503;1504;1519;1706;2040;2159;2456;2457;2458;2459;2578;2736;2856;2908;3022;3231;3265;3330;3493;3651;3760;3850;3881;3930;4667;4782;4972;5563;5564;5566;5661;5774;5857;5915;5955;6033;6044;6074;6588;6624;6628;6970;7020;7338;7378;7401;7923;7941;7956;8038;8240;8403;8701;8798;8799;8848;8878;8884;8885;8886;8998;9216;9226;9416;9417;9583;96…	IPI00398002		ENSG00000178209	PLEC	PLEC{plectin [Source:HGNC Symbol,Acc:9069]}	162	1	126	157	1	1	39.1	0.3	0.3	518.03	4570	1	1	0	31.8	37.2
2870	11219	IPI00399115	NP_001093136	ENSG00000188647	PTAR1	PTAR1{protein prenyltransferase alpha subunit repeat containing 1 [Source:HGNC Symbol,Acc:30449]}	1	1	1	1	1	1	2.2	2.2	2.2	46.405	402	2	2	0.004819	2.2	2.2
2871	15033	IPI00399130		ENSG00000232850	AL590708.2	AL590708.2{}	1	1	1	1	1	1	3.5	3.5	3.5	24.914	231	12	13	0.0036809	3.5	3.5
2872	11304	IPI00399183	NP_061160	ENSG00000184730	APOBR	APOBR{apolipoprotein B receptor [Source:HGNC Symbol,Acc:24087]}	1	1	1	1	1	1	1	1	1	114.82	1088	8	7	4.8535e-16	1	1
2873	17572	IPI00400922	NP_055791	ENSG00000148843	PDCD11	PDCD11{programmed cell death 11 [Source:HGNC Symbol,Acc:13408]}	1	1	1	1	1	1	0.6	0.6	0.6	208.7	1871	10	5	1.0099e-05	0.6	0.6
2876	15158	IPI00409607	NP_982284	ENSG00000118200	CAMSAP1L1	CAMSAP1L1{calmodulin regulated spectrin-associated protein 1-like 1 [Source:HGNC Symbol,Acc:29188]}	1	1	1	1	1	1	0.7	0.7	0.7	168.09	1489	1	1	0.0034828	0.7	0.7
2878	3671;13630;13636	IPI00409659	NP_038472	ENSG00000188021	UBQLN2	UBQLN2{ubiquilin 2 [Source:HGNC Symbol,Acc:12509]}	3	1	1	3	1	1	6.7	2.4	2.4	65.695	624	2	1	4.666e-66	2.4	6.7
2879	3848	IPI00409758	NP_742066	ENSG00000152527	PLEKHH2	PLEKHH2{pleckstrin homology domain containing, family H (with MyTH4 domain) member 2 [Source:HGNC Symbol,Acc:30506]}	1	1	0	1	0	1	0.8	0.8	0.8	168.23	1493		3	0.0020822	0	0.8
2884	5866	IPI00410256	NP_001189433;NP_004706;NP_430255	ENSG00000060069	CTDP1	CTDP1{CTD (carboxy-terminal domain, RNA polymerase II, polypeptide A) phosphatase, subunit 1 [Source:HGNC Symbol,Acc:2498]}	1	1	1	1	1	1	0.9	0.9	0.9	104.4	961	4	2	7.817e-05	0.9	0.9
2885	10224	IPI00867714	NP_689557	ENSG00000161654	LSM12	LSM12{LSM12 homolog (S. cerevisiae) [Source:HGNC Symbol,Acc:26407]}	1	1	0	1	0	1	6.6	6.6	6.6	21.999	198		5	0.0033913	0	6.6
2886	6922;8077;18136	IPI00410496					3	1	3	3	1	1	18.6	4.3	4.3	15.769	140	1	3	1.0425e-30	18.6	18.6
2887	9786	IPI00410544	NP_079352	ENSG00000115652	UXS1	UXS1{UDP-glucuronate decarboxylase 1 [Source:HGNC Symbol,Acc:17729]}	1	1	1	1	1	1	4.2	4.2	4.2	48.151	425	2	2	0.00095206	4.2	4.2
2889	10324;12001;15490	IPI00410666	NP_874365;NP_056171	ENSG00000180900;ENSG00000256726	AC105219.6;SCRIB	AC105219.6{protein scribble homolog isoform a [Source:RefSeq peptide,Acc:NP_874365]};SCRIB{scribbled homolog (Drosophila) [Source:HGNC Symbol,Acc:30377]}	3	1	3	3	1	1	2.3	0.8	0.8	177.69	1655	5	4	4.5624e-63	2.3	2.3
2893	9058;13045	IPI00411452	NP_653259	ENSG00000147251	DOCK11	DOCK11{dedicator of cytokinesis 11 [Source:HGNC Symbol,Acc:23483]}	2	1	2	2	1	1	0.7	0.7	0.3	238.1	2077	8	10	0.00081148	0.7	0.7
2897	4721	IPI00411730	NP_001035847;NP_005125	ENSG00000154845	PPP4R1	PPP4R1{protein phosphatase 4, regulatory subunit 1 [Source:HGNC Symbol,Acc:9320]}	1	1	1	1	1	1	0.8	0.8	0.8	107	950	6	7	0.0026489	0.8	0.8
2899	2553;9485	IPI00411763	NP_904325;NP_055889;NP_004312	ENSG00000054523;ENSG00000130294	KIF1B;KIF1A	KIF1B{kinesin family member 1B [Source:HGNC Symbol,Acc:16636]};KIF1A{kinesin family member 1A [Source:HGNC Symbol,Acc:888]}	2	1	2	2	1	1	1.3	0.8	0.8	130.36	1153	8	1	1.6331e-05	1.3	1.3
2906	3980	IPI00412272	NP_113657	ENSG00000198478	SH3BGRL2	SH3BGRL2{SH3 domain binding glutamic acid-rich protein like 2 [Source:HGNC Symbol,Acc:15567]}	1	1	1	1	1	1	13.1	13.1	13.1	12.326	107	11	10	2.1939e-31	13.1	13.1
2912	10327	IPI00412741	NP_998814	ENSG00000183605	SFXN4	SFXN4{sideroflexin 4 [Source:HGNC Symbol,Acc:16088]}	1	1	1	1	1	1	4.2	4.2	4.2	37.998	337	1	2	5.8483e-07	4.2	4.2
2915	13729	IPI00412987	NP_004115	ENSG00000197045	GMFB	GMFB{glia maturation factor, beta [Source:HGNC Symbol,Acc:4373]}	1	1	1	1	1	1	7.1	7.1	7.1	18.11	154	1	3	2.946e-05	7.1	7.1
2918	13743;19932	IPI00829976		ENSG00000211953	IGHV3-30	IGHV3-30{immunoglobulin heavy variable 3-30 [Source:HGNC Symbol,Acc:5591]}	2	1	0	2	0	1	7.3	2.8	2.8	26.894	246		4	0.00048465	0	7.3
2919	14582	IPI00413265	NP_055925	ENSG00000198887	SMC5	SMC5{structural maintenance of chromosomes 5 [Source:HGNC Symbol,Acc:20465]}	1	1	1	1	1	1	0.8	0.8	0.8	128.81	1101	5	5	4.0578e-07	0.8	0.8
2928	6574	IPI00413778	NP_000792;NP_463460	ENSG00000088832	FKBP1A	FKBP1A{FK506 binding protein 1A, 12kDa [Source:HGNC Symbol,Acc:3711]}	1	1	0	1	0	1	9.7	9.7	9.7	15.689	145		10	1.8049e-23	0	9.7
2929	9426	IPI00413784	NP_065184;NP_996809	ENSG00000162430	SEPN1	SEPN1{selenoprotein N, 1 [Source:HGNC Symbol,Acc:15999]}	1	1	1	1	1	1	1.4	1.4	1.4	65.718	590	3	4	0.0018573	1.4	1.4
2936	5558	IPI00414554	NP_112240	ENSG00000136950	ARPC5L	ARPC5L{actin related protein 2/3 complex, subunit 5-like [Source:HGNC Symbol,Acc:23366]}	1	1	1	1	1	1	12.4	12.4	12.4	16.941	153	1	1	4.7547e-05	12.4	12.4
2947	15309;17933;19310	IPI00418277	NP_787052	ENSG00000198108	CHSY3	CHSY3{chondroitin sulfate synthase 3 [Source:HGNC Symbol,Acc:24293]}	3	1	2	3	1	1	2.5	1.1	1.1	100.28	882	1	2	5.7549e-05	1.8	2.5
2953	9708	IPI00549274	NP_443180;NP_001166101	ENSG00000004777	ARHGAP33	ARHGAP33{Rho GTPase activating protein 33 [Source:HGNC Symbol,Acc:23085]}	1	1	1	1	1	1	0.7	0.7	0.7	137.21	1287	1	6	0.0047593	0.7	0.7
2955	4857;5495;6093;6106;7062;8386;9656;11872;11993;13115;14932;17157	IPI00419258	NP_002119	ENSG00000189403	HMGB1	HMGB1{high mobility group box 1 [Source:HGNC Symbol,Acc:4983]}	12	1	8	12	0	1	50.7	50.7	3.3	24.893	215	28	66	2.9934e-76	39.1	50.7
2957	9780;15513;18252	IPI00419273	NP_001008895;NP_003580	ENSG00000139842	CUL4A	CUL4A{cullin 4A [Source:HGNC Symbol,Acc:2554]}	3	1	3	2	1	0	3.6	3.6	1.7	87.679	759	8	7	9.7394e-19	3.6	1.8
2960	15958	IPI00419433	NP_001002814;NP_079427	ENSG00000156675	RAB11FIP1	RAB11FIP1{RAB11 family interacting protein 1 (class I) [Source:HGNC Symbol,Acc:30265]}	1	1	0	1	0	1	0.8	0.8	0.8	137.19	1283		5	1.2099e-15	0	0.8
2967	14925	IPI00419844	NP_006581	ENSG00000168883	USP39	USP39{ubiquitin specific peptidase 39 [Source:HGNC Symbol,Acc:20071]}	1	1	1	1	1	1	2.3	2.3	2.3	65.38	565	7	5	1.6767e-06	2.3	2.3
2976	827;2583;3830;3831;4932;6240;13692;16051;16846;17012;18661;19946	IPI00423463		ENSG00000211896	IGHG1	IGHG1{immunoglobulin heavy constant gamma 1 (G1m marker) [Source:HGNC Symbol,Acc:5525]}	12	1	11	11	0	1	29.2	1.5	1.5	52.612	480		1	0	27.7	25.8
2979	1982	IPI00424460	NP_001098721;NP_055548	ENSG00000039319	ZFYVE16	ZFYVE16{zinc finger, FYVE domain containing 16 [Source:HGNC Symbol,Acc:20756]}	1	1	1	1	1	1	0.9	0.9	0.9	168.9	1539	1	1	0.00090413	0.9	0.9
2984	9006;16641	IPI00429633	NP_063944	ENSG00000086619	ERO1LB	ERO1LB{ERO1-like beta (S. cerevisiae) [Source:HGNC Symbol,Acc:14355]}	2	1	2	1	1	0	3.6	2.4	2.4	53.543	467	2		0.00026594	3.6	1.3
2986	12228	IPI00480028	NP_005461;NP_001171587;NP_001012768;NP_001171590;NP_001012770;NP_001012769;NP_001171591;NP_001171592;NP_001171593;NP_001171594;NP_001171595	ENSG00000136754	ABI1	ABI1{abl-interactor 1 [Source:HGNC Symbol,Acc:11320]}	1	1	1	1	1	1	3.1	3.1	3.1	55.259	509	2	2	2.6682e-05	3.1	3.1
2990	7872	IPI00434389	NP_001185728;NP_001185727;NP_001185729;NP_057031	ENSG00000138303	ASCC1	ASCC1{activating signal cointegrator 1 complex subunit 1 [Source:HGNC Symbol,Acc:24268]}	1	1	1	1	1	1	2.2	2.2	2.2	45.509	400	2	2	1.9638e-11	2.2	2.2
2992	19802	IPI00438170	NP_037478	ENSG00000147164	SNX12	SNX12{sorting nexin 12 [Source:HGNC Symbol,Acc:14976]}	1	1	1	1	1	1	4.7	4.7	4.7	19.73	172	2	2	8.4179e-05	4.7	4.7
2998	2964	IPI00914893	NP_001171761;NP_000329	ENSG00000074803	SLC12A1	SLC12A1{solute carrier family 12 (sodium/potassium/chloride transporters), member 1 [Source:HGNC Symbol,Acc:10910]}	1	1	1	1	1	1	0.8	0.8	0.8	121.36	1099	2	2	0.00013426	0.8	0.8
3001	10094	IPI00444371	NP_061918;NP_001171894;NP_001171895	ENSG00000131725	WDR44	WDR44{WD repeat domain 44 [Source:HGNC Symbol,Acc:30512]}	1	1	1	1	1	1	1.5	1.5	1.5	101.37	913	6	6	0.00015232	1.5	1.5
3003	18148	IPI00448095	NP_001182147;NP_057370	ENSG00000169738	DCXR	DCXR{dicarbonyl/L-xylulose reductase [Source:HGNC Symbol,Acc:18985]}	1	1	1	1	1	1	4.1	4.1	4.1	25.913	244	4	7	0.0035665	4.1	4.1
3010	3290;14783;19067	IPI00454991	NP_954580;NP_001155977	ENSG00000240849	TMEM189	TMEM189{transmembrane protein 189 [Source:HGNC Symbol,Acc:16735]}	3	1	3	3	1	1	13.3	5.6	5.6	31.135	270	2	1	2.6187e-08	13.3	13.3
3011	3346;12064;12315;12360;15040;15112;16005;18514;19796	IPI00455457		ENSG00000203818	HIST2H3PS2	HIST2H3PS2{histone cluster 2, H3, pseudogene 2 [Source:HGNC Symbol,Acc:32060]}	9	1	7	9	1	1	41.2	8.1	8.1	15.43	136	3	5	6.6952e-29	36	41.2
3029	13531;15080	IPI00465059	NP_620124	ENSG00000140983	RHOT2	RHOT2{ras homolog gene family, member T2 [Source:HGNC Symbol,Acc:21169]}	2	1	2	2	1	1	3.4	1.6	1.6	68.117	618	6	6	1.9268e-08	3.4	3.4
3040	15634	IPI00892736	NP_001138775;NP_653287	ENSG00000167608	TMC4	TMC4{transmembrane channel-like 4 [Source:HGNC Symbol,Acc:22998]}	1	1	1	1	1	1	1.4	1.4	1.4	79.305	712	6	8	7.5649e-07	1.4	1.4
3046	7759;9356	IPI00465273	NP_060224	ENSG00000065060	UHRF1BP1	UHRF1BP1{UHRF1 binding protein 1 [Source:HGNC Symbol,Acc:21216]}	2	1	1	2	1	1	1.2	0.8	0.8	159.48	1440	1	1	0.00011059	0.8	1.2
3053	14308	IPI00465378	NP_001160070;NP_443200	ENSG00000110243	APOA5	APOA5{apolipoprotein A-V [Source:HGNC Symbol,Acc:17288]}	1	1	1	1	1	1	2.7	2.7	2.7	41.212	366	17	29	0.0012431	2.7	2.7
3059	1273;17305	IPI00760962	NP_056308;NP_001129663	ENSG00000197256	KANK2	KANK2{KN motif and ankyrin repeat domains 2 [Source:HGNC Symbol,Acc:29300]}	2	1	2	2	1	1	3.4	3.4	1.4	91.92	859	6	4	1.2833e-14	3.4	3.4
3060	12907	IPI00470631	NP_064708	ENSG00000088682	COQ9	COQ9{coenzyme Q9 homolog (S. cerevisiae) [Source:HGNC Symbol,Acc:25302]}	1	1	1	1	1	1	3.5	3.5	3.5	35.509	318	12	14	4.6925e-16	3.5	3.5
3066	5985	IPI00552897	NP_055456	ENSG00000137337;ENSG00000224587;ENSG00000225589;ENSG00000228575;ENSG00000234012;ENSG00000237095;ENSG00000206481	MDC1	MDC1{mediator of DNA-damage checkpoint 1 [Source:HGNC Symbol,Acc:21163]}	1	1	1	1	1	1	0.7	0.7	0.7	226.66	2089	4	3	0.00080117	0.7	0.7
3069	14924	IPI00478450	NP_061929;NP_001129470	ENSG00000147123	NDUFB11	NDUFB11{NADH dehydrogenase (ubiquinone) 1 beta subcomplex, 11, 17.3kDa [Source:HGNC Symbol,Acc:20372]}	1	1	1	1	1	1	14.1	14.1	14.1	18.364	163	2	7	4.8136e-55	14.1	14.1
3071	3418;6417;8921;8936	IPI00472614	NP_056391	ENSG00000187672	ERC2	ERC2{ELKS/RAB6-interacting/CAST family member 2 [Source:HGNC Symbol,Acc:31922]}	4	1	1	4	0	1	2.9	0.8	0.8	110.56	957		1	2.052e-06	0.6	2.9
3081	18276	IPI00477992	NP_000482	ENSG00000173369	C1QB	C1QB{complement component 1, q subcomponent, B chain [Source:HGNC Symbol,Acc:1242]}	1	1	1	1	1	1	5.5	5.5	5.5	26.721	253	2	2	2.9972e-11	5.5	5.5
3085	6219;7107;12197;15922;19825	IPI00478442	NP_997403	ENSG00000115310	RTN4	RTN4{reticulon 4 [Source:HGNC Symbol,Acc:14085]}	5	1	4	5	1	1	21.9	21.9	2.8	42.274	392	17	28	6.969e-82	13.3	21.9
3089	62;651;1676;2322;2776;3051;4088;4456;4531;4571;5190;6535;7336;7602;8036;9017;9402;10368;10776;11002;11488;12172;13118;13119;13370;14478;15557;15910;16303;16304;16344;16700;16773;17773	IPI00479145	NP_002267	ENSG00000171345	KRT19	KRT19{keratin 19 [Source:HGNC Symbol,Acc:6436]}	34	1	30	34	1	1	80.8	76.8	7.5	44.105	400	324	527	0	73.5	80.8
3094	6903;7186;15966	IPI00745406	NP_001124000;NP_003962	ENSG00000008294	SPAG9	SPAG9{sperm associated antigen 9 [Source:HGNC Symbol,Acc:14524]}	3	1	3	2	1	1	2.6	0.7	0.7	146.33	1322	4	4	7.7367e-53	2.6	1.5
3095	1911;3941;5094;6284;6464;14312;14527;18537	IPI00479708		ENSG00000211899	IGHM	IGHM{immunoglobulin heavy constant mu [Source:HGNC Symbol,Acc:5541]}	8	1	3	8	0	1	24.5	3.5	3.5	41.272	375		2	1.164e-44	8.5	24.5
3097	450;1426;1427;5959;7685;7760;11182;14080;16173;17269	IPI00479743	NP_001077007;NP_001092;NP_001186883;NP_001605	ENSG00000188219;ENSG00000196834;ENSG00000222038;ENSG00000075624;ENSG00000184009	AC131180.2;POTEI;POTEJ;ACTB;ACTG1	AC131180.2{POTE ankyrin domain family member E [Source:UniProtKB/Swiss-Prot,Acc:Q6S8J3]};POTEI{POTE ankyrin domain family, member I [Source:HGNC Symbol,Acc:37093]};POTEJ{POTE ankyrin domain family, member J [Source:HGNC Symbol,Acc:37094]};ACTB{actin, beta [Source:HGNC Symbol,Acc:132]};ACTG1{actin, gamma 1 [Source:HGNC Symbol,Acc:144]}	10	1	9	10	0	1	10.6	1.7	1.7	121.36	1075		1	0	8.9	10.6
3100	14377	IPI00848276	NP_060252	ENSG00000108021	C10orf18	C10orf18{chromosome 10 open reading frame 18 [Source:HGNC Symbol,Acc:23484]}	1	1	1	0	1	0	0.5	0.5	0.5	268.84	2430	2		0.00063563	0.5	0
3104	411;7434;19473	IPI00513946		ENSG00000078618	NRD1	NRD1{nardilysin (N-arginine dibasic convertase) [Source:HGNC Symbol,Acc:7995]}	3	1	2	3	0	1	5.1	1.1	1.1	63.694	553		1	1.8135e-06	4	5.1
3108	13829	IPI00514506	NP_078816;NP_663781	ENSG00000143314	MRPL24	MRPL24{mitochondrial ribosomal protein L24 [Source:HGNC Symbol,Acc:14037]}	1	1	1	1	1	1	6	6	6	24.915	216	2	4	1.8363e-15	6	6
3109	1403;2102;5603;13337;16225	IPI00514755		ENSG00000078808	SDF4	SDF4{stromal cell derived factor 4 [Source:HGNC Symbol,Acc:24188]}	5	1	4	3	1	0	23.5	2.5	2.5	28.001	243	1		6.3046e-33	18.5	14.4
3111	9188	IPI00549389	NP_054783	ENSG00000148335	METTL11A	METTL11A{methyltransferase like 11A [Source:HGNC Symbol,Acc:23373]}	1	1	1	1	1	1	3.1	3.1	3.1	25.474	224	7	7	0.005146	3.1	3.1
3112	14864	IPI00515063		ENSG00000197182	RP4-695O20__B.10	RP4-695O20__B.10{microRNA let-7b (MIRLET7B), microRNA [Source:RefSeq DNA,Acc:NR_029479]}	1	1	1	0	1	0	5	5	5	23.653	219	1		0.0037613	5	0
3115	10312	IPI00549343	NP_004772	ENSG00000049245	VAMP3	VAMP3{vesicle-associated membrane protein 3 (cellubrevin) [Source:HGNC Symbol,Acc:12644]}	1	1	0	1	0	1	16	16	16	11.309	100		4	7.1973e-20	0	16
3119	10039	IPI00889000	NP_001014839;NP_001014841;NP_055099	ENSG00000020129	NCDN	NCDN{neurochondrin [Source:HGNC Symbol,Acc:17597]}	1	1	1	1	1	1	1.5	1.5	1.5	79.157	731	5	3	0.0015857	1.5	1.5
3131	15853	IPI00550165	NP_056325	ENSG00000109016	DHRS7B	DHRS7B{dehydrogenase/reductase (SDR family) member 7B [Source:HGNC Symbol,Acc:24547]}	1	1	1	1	1	1	4.6	4.6	4.6	35.119	325	3	1	1.0344e-23	4.6	4.6
3132	318;767	IPI00550192	NP_071381	ENSG00000196236	XPNPEP3	XPNPEP3{X-prolyl aminopeptidase (aminopeptidase P) 3, putative [Source:HGNC Symbol,Acc:28052]}	2	1	2	2	1	1	3.7	2.4	2.4	57.033	507	1	2	1.6381e-11	3.7	3.7
3133	16385	IPI00550239	NP_005309	ENSG00000189060	H1F0	H1F0{H1 histone family, member 0 [Source:HGNC Symbol,Acc:4714]}	1	1	0	1	0	1	6.7	6.7	6.7	20.863	194		4	2.9985e-07	0	6.7
3140	1413	IPI00550655	NP_006708	ENSG00000106723	SPIN1	SPIN1{spindlin 1 [Source:HGNC Symbol,Acc:11243]}	1	1	1	1	1	1	6.5	6.5	6.5	29.6	262	1	2	3.1387e-12	6.5	6.5
3142	2552;5038;15386;17029;17389;18726	IPI00550731		ENSG00000243238;ENSG00000241351;ENSG00000211630;ENSG00000242371;ENSG00000251546;ENSG00000240864;ENSG00000239951;ENSG00000211592;ENSG00000242534;ENSG00000244116;ENSG00000243264;ENSG00000211623;ENSG00000239571;ENSG00000258310	IGKV2-30;IGKV3-11;IGKV1D-13;IGKV1-39;IGKV1D-39;IGKV1-16;IGKV3-20;IGKC;IGKV2D-28;IGKV2-28;IGKV2D-29;IGKV2D-26;IGKV2D-30;AC233264.5	IGKV2-30{immunoglobulin kappa variable 2-30 [Source:HGNC Symbol,Acc:5785]};IGKV3-11{immunoglobulin kappa variable 3-11 [Source:HGNC Symbol,Acc:5815]};IGKV1D-13{immunoglobulin kappa variable 1D-13 [Source:HGNC Symbol,Acc:5747]};IGKV1-39{immunoglobulin kappa variable 1-39 (gene/pseudogene) [Source:HGNC Symbol,Acc:5740]};IGKV1D-39{immunoglobulin kappa variable 1D-39 [Source:HGNC Symbol,Acc:5756]};IG…	6	1	6	6	1	1	41	41	5.4	26.234	239	34	80	0	41	41
3147	18839;19428	IPI00550917	NP_009215	ENSG00000247596	TWF2	TWF2{twinfilin, actin-binding protein, homolog 2 (Drosophila) [Source:HGNC Symbol,Acc:9621]}	2	1	2	1	1	0	4	2	2	39.548	349	1		0.00077307	4	2
3150	5074;19685	IPI00552073	NP_001157711;NP_003578	ENSG00000204560;ENSG00000226171;ENSG00000231377;ENSG00000233049;ENSG00000233418;ENSG00000233561;ENSG00000227222	DHX16	DHX16{DEAH (Asp-Glu-Ala-His) box polypeptide 16 [Source:HGNC Symbol,Acc:2739]}	2	1	2	2	1	1	2	1.2	1.2	119.26	1041	2	2	2.5406e-05	2	2
3153	4236	IPI00552587	NP_443082	ENSG00000179271	GADD45GIP1	GADD45GIP1{growth arrest and DNA-damage-inducible, gamma interacting protein 1 [Source:HGNC Symbol,Acc:29996]}	1	1	1	1	1	1	6.3	6.3	6.3	25.384	222	1	1	5.2891e-11	6.3	6.3
3154	14296	IPI00553006	NP_689481	ENSG00000162396	PARS2	PARS2{prolyl-tRNA synthetase 2, mitochondrial (putative) [Source:HGNC Symbol,Acc:30563]}	1	1	1	1	1	1	2.3	2.3	2.3	53.262	475	2	3	0.00041746	2.3	2.3
3156	3073;4024	IPI00553172		ENSG00000164305	CASP3	CASP3{caspase 3, apoptosis-related cysteine peptidase [Source:HGNC Symbol,Acc:1504]}	2	1	1	2	0	1	9.6	4.5	4.5	17.577	157		3	6.207e-05	5.1	9.6
3167	2146;6300;6327;13405	IPI00554752	NP_002727	ENSG00000005249	PRKAR2B	PRKAR2B{protein kinase, cAMP-dependent, regulatory, type II, beta [Source:HGNC Symbol,Acc:9392]}	4	1	4	3	1	0	12.4	4.1	4.1	46.302	418	1		8.9492e-125	12.4	8.4
3172	999;3564;4005;6704;7417;7447;7448;9185;11654;14529;15118	IPI00554798	NP_003512	ENSG00000196374	HIST1H2BM	HIST1H2BM{histone cluster 1, H2bm [Source:HGNC Symbol,Acc:4750]}	11	1	11	11	1	1	63.5	4.8	4.8	13.989	126	1	1	4.3392e-222	63.5	63.5
3177	225;5228;8176	IPI00555915					3	1	3	2	1	0	6.1	1.9	1.9	41.46	361	1		3.8406e-07	6.1	4.2
3179	609;2621;18343	IPI00556028					3	1	3	3	1	1	12.8	5.7	5.7	32.705	282	5	3	1.5913e-28	12.8	12.8
3180	18763	IPI00604527	NP_079426	ENSG00000143374	TARS2	TARS2{threonyl-tRNA synthetase 2, mitochondrial (putative) [Source:HGNC Symbol,Acc:30740]}	1	1	1	1	1	1	1.4	1.4	1.4	81.035	718	4	4	0.0020112	1.4	1.4
3188	9040	IPI00607685	NP_061967	ENSG00000173598	NUDT4	NUDT4{nudix (nucleoside diphosphate linked moiety X)-type motif 4 [Source:HGNC Symbol,Acc:8051]}	1	1	1	1	1	1	5.6	5.6	5.6	20.306	180	2	2	0.0023281	5.6	5.6
3196	8	IPI00936328	NP_075385	ENSG00000175130	MARCKSL1	MARCKSL1{MARCKS-like 1 [Source:HGNC Symbol,Acc:7142]}	1	1	1	1	1	1	5.9	5.9	5.9	22.922	221	2	2	1.0951e-10	5.9	5.9
3198	10380	IPI00641251	NP_057663;NP_001159367	ENSG00000167775	CD320	CD320{CD320 molecule [Source:HGNC Symbol,Acc:16692]}	1	1	1	1	1	1	3.9	3.9	3.9	28.991	282	6	4	1.3911e-15	3.9	3.9
3199	17118	IPI00641330	NP_002922	ENSG00000204227;ENSG00000206287;ENSG00000226788;ENSG00000228520;ENSG00000231115;ENSG00000235107	RING1	RING1{ring finger protein 1 [Source:HGNC Symbol,Acc:10018]}	1	1	1	1	1	1	2.7	2.7	2.7	42.429	406	2	1	2.0003e-05	2.7	2.7
3202	4143	IPI00745568	NP_690866;NP_001026970	ENSG00000143155	TIPRL	TIPRL{TIP41, TOR signaling pathway regulator-like (S. cerevisiae) [Source:HGNC Symbol,Acc:30231]}	1	1	1	1	1	1	5.5	5.5	5.5	31.444	272	1	1	2.7675e-32	5.5	5.5
3210	9400	IPI00642370	NP_116072	ENSG00000254858	MPV17L2	MPV17L2{MPV17 mitochondrial membrane protein-like 2 [Source:HGNC Symbol,Acc:28177]}	1	1	1	1	1	1	5.8	5.8	5.8	23.18	206	4	6	5.9601e-05	5.8	5.8
3212	872	IPI00642798	NP_006446	ENSG00000141696;ENSG00000257610	AC091172.3;LEPREL4	AC091172.3{synaptonemal complex protein SC65 [Source:RefSeq peptide,Acc:NP_006446]};LEPREL4{leprecan-like 4 [Source:HGNC Symbol,Acc:16946]}	1	1	1	1	1	1	2.1	2.1	2.1	59.592	528	3	3	0.00013971	2.1	2.1
3218	4065	IPI00643658					1	1	1	0	1	0	19.6	19.6	19.6	6.696	56	2		0.0047576	19.6	0
3219	10649	IPI00745125	NP_003092	ENSG00000057252	SOAT1	SOAT1{sterol O-acyltransferase 1 [Source:HGNC Symbol,Acc:11177]}	1	1	1	1	1	1	2.5	2.5	2.5	64.734	550	3	4	0.00067627	2.5	2.5
3223	1838;2673;3332;4890;5805;6389;8762;9499;10744;11505;12875;14659	IPI00644431	NP_001190986;NP_005795	ENSG00000123136	DDX39A	DDX39A{DEAD (Asp-Glu-Ala-Asp) box polypeptide 39A [Source:HGNC Symbol,Acc:17821]}	12	1	10	11	1	0	23.4	4.5	3.2	53.768	470	2	2	5.1191e-109	22.1	20.2
3227	18947	IPI00743284	NP_000245	ENSG00000116984	MTR	MTR{5-methyltetrahydrofolate-homocysteine methyltransferase [Source:HGNC Symbol,Acc:7468]}	1	1	0	1	0	1	0.9	0.9	0.9	140.53	1265		1	8.3422e-43	0	0.9
3229	8578	IPI00645172	NP_060680	ENSG00000213995	CARKD	CARKD{carbohydrate kinase domain containing [Source:HGNC Symbol,Acc:25576]}	1	1	0	1	0	1	3.1	3.1	3.1	41.36	390		3	0.00035782	0	3.1
3230	241;827;2583;3830;3831;4932;6240;13692;16051;16846;17012;18661	IPI00645363		ENSG00000211896;ENSG00000211940	IGHG1;IGHV3-9	IGHG1{immunoglobulin heavy constant gamma 1 (G1m marker) [Source:HGNC Symbol,Acc:5525]};IGHV3-9{immunoglobulin heavy variable 3-9 [Source:HGNC Symbol,Acc:5628]}	12	1	11	11	0	1	30.5	2.3	2.3	51.724	472		2	0	28.2	27.1
3231	12859	IPI00902843	NP_006310	ENSG00000103502	CDIPT	CDIPT{CDP-diacylglycerol--inositol 3-phosphatidyltransferase [Source:HGNC Symbol,Acc:1769]}	1	1	0	1	0	1	4.6	4.6	4.6	25.946	237		3	0.0055341	0	4.6
3234	9815	IPI00654605	NP_060537	ENSG00000116871	MAP7D1	MAP7D1{MAP7 domain containing 1 [Source:HGNC Symbol,Acc:25514]}	1	1	1	1	1	1	1.3	1.3	1.3	92.819	841	2	4	0.0020136	1.3	1.3
3235	4857;5495;6093;7062;8386;9656;11872;11993;13004;13115;14932;17157	IPI00645948		ENSG00000189403	HMGB1	HMGB1{high mobility group box 1 [Source:HGNC Symbol,Acc:4983]}	12	1	8	12	0	1	50	2.8	2.8	25.814	216		2	9.1467e-76	38.9	50
3236	368;2639;4020;4475;4492;6547;6731;6873;7860;8842;9845;13027;15524;19304;19853;19874	IPI00646055		ENSG00000126602	TRAP1	TRAP1{TNF receptor-associated protein 1 [Source:HGNC Symbol,Acc:16264]}	16	1	15	15	1	1	28.6	1.8	1.8	74.225	651	3	3	1.0108e-207	27.5	25.5
3237	14443	IPI00796170	NP_002901	ENSG00000102032	RENBP	RENBP{renin binding protein [Source:HGNC Symbol,Acc:9959]}	1	1	1	1	1	1	3.7	3.7	3.7	48.83	427	2	2	4.4472e-09	3.7	3.7
3238	4995;9170;10059;11330;15185;15798;16754;18974;19465	IPI00646229	NP_001027020;NP_002773	ENSG00000170848	PSG6	PSG6{pregnancy specific beta-1-glycoprotein 6 [Source:HGNC Symbol,Acc:9523]}	9	1	9	9	1	1	22.6	3.3	3.3	47.594	425	2	15	1.6937e-94	22.6	22.6
3239	11295	IPI00646291	NP_851320	ENSG00000152749	GPR180	GPR180{G protein-coupled receptor 180 [Source:HGNC Symbol,Acc:28899]}	1	1	1	0	1	0	2.5	2.5	2.5	49.395	440	3		0.0018475	2.5	0
3242	16590	IPI00646689	NP_116120	ENSG00000129235	TXNDC17	TXNDC17{thioredoxin domain containing 17 [Source:HGNC Symbol,Acc:28218]}	1	1	1	1	1	1	8.1	8.1	8.1	13.941	123	6	8	1.1197e-10	8.1	8.1
3245	420;1395;2953;4380;4387;5461;7756;9431;10497;13401;14237;14238;16699;17647	IPI01008724	NP_001180343;NP_061816	ENSG00000183785	TUBA8	TUBA8{tubulin, alpha 8 [Source:HGNC Symbol,Acc:12410]}	14	1	13	14	0	1	33.8	1.5	1.5	53.969	479		3	0	32.4	33.8
3249	350;655;1609;3130;11991;12139;13278;14909;15019;17165;17369;18112;18904	IPI00647400		ENSG00000176393	RNPEP	RNPEP{arginyl aminopeptidase (aminopeptidase B) [Source:HGNC Symbol,Acc:10078]}	13	1	11	11	1	1	20.3	2.9	2.9	68.168	611	4	1	1.6751e-62	16.2	19.1
3255	9491	IPI00654820	YP_003024031	ENSG00000198899	MT-ATP6	MT-ATP6{mitochondrially encoded ATP synthase 6 [Source:HGNC Symbol,Acc:7414]}	1	1	1	1	1	1	4.2	4.2	4.2	26.049	236	3	9	9.6591e-30	4.2	4.2
3258	3166;4472;6408;6886;8703;9537;12514;13191;13195;18062	IPI00657911		ENSG00000196565	HBG2	HBG2{hemoglobin, gamma G [Source:HGNC Symbol,Acc:4832]}	10	1	9	10	0	1	73.7	6.6	6.6	15.319	137		1	0	67.2	73.7
3261	1473;8870	IPI00658145	NP_689956	ENSG00000106009	BRAT1	BRAT1{BRCA1-associated ATM activator 1 [Source:HGNC Symbol,Acc:21701]}	2	1	2	1	1	0	2.1	1.3	1.3	88.118	821	1		5.4352e-06	2.1	0.7
3262	21;15291;17591	IPI00658205		ENSG00000113522	RAD50	RAD50{RAD50 homolog (S. cerevisiae) [Source:HGNC Symbol,Acc:9816]}	3	1	2	3	1	1	5.5	5.5	1.4	76.557	660	2	6	7.5233e-06	4.1	5.5
3263	16149	IPI00908772	NP_001374	ENSG00000108963	DPH1	DPH1{DPH1 homolog (S. cerevisiae) [Source:HGNC Symbol,Acc:3003]}	1	1	1	1	1	1	2.4	2.4	2.4	50.245	453	5	4	0.0027835	2.4	2.4
3266	181;525;16194;18550;19177	IPI00973556	NP_001171597	ENSG00000254709	IGLL5	IGLL5{immunoglobulin lambda-like polypeptide 5 [Source:HGNC Symbol,Acc:38476]}	5	1	3	5	1	1	23.3	7.2	4.2	24.712	236	1	9	1.7019e-154	14	23.3
3269	5851	IPI00735451		ENSG00000211966	IGHV5-51	IGHV5-51{immunoglobulin heavy variable 5-51 [Source:HGNC Symbol,Acc:5659]}	1	1	1	0	1	0	13.7	13.7	13.7	12.674	117	3		1.1646e-07	13.7	0
3270	5621	IPI00784368	NP_001534	ENSG00000070614	NDST1	NDST1{N-deacetylase/N-sulfotransferase (heparan glucosaminyl) 1 [Source:HGNC Symbol,Acc:7680]}	1	1	1	1	1	1	1.5	1.5	1.5	100.87	882	3	1	8.0748e-05	1.5	1.5
3272	2879;16591	IPI00739940	NP_055845;NP_075463	ENSG00000075539;ENSG00000073910	FRYL;FRY	FRYL{FRY-like [Source:HGNC Symbol,Acc:29127]};FRY{furry homolog (Drosophila) [Source:HGNC Symbol,Acc:20367]}	2	1	1	2	1	1	0.5	0.5	0.2	339.59	3013	4	3	0.00054765	0.2	0.5
3282	1348;3166;4472;5763;5764;6408;6886;8703;9537;18063;18236	IPI00744503		ENSG00000213934	HBG1	HBG1{hemoglobin, gamma A [Source:HGNC Symbol,Acc:4831]}	11	1	11	11	1	1	69	6.3	6.3	17.316	158	1	2	0	69	69
3289	2875	IPI00745313	NP_001120	ENSG00000106624	AEBP1	AEBP1{AE binding protein 1 [Source:HGNC Symbol,Acc:303]}	1	1	1	1	1	1	1	1	1	130.93	1158	2	2	2.4393e-18	1	1
3292	891	IPI00745792	NP_065728	ENSG00000153406	NMRAL1	NMRAL1{NmrA-like family domain containing 1 [Source:HGNC Symbol,Acc:24987]}	1	1	1	1	1	1	3.6	3.6	3.6	37.051	335	2	1	0.0046751	3.6	3.6
3294	2137;10682;11064	IPI00746004	NP_057004;NP_001021	ENSG00000185088;ENSG00000177954	RPS27L;RPS27	RPS27L{ribosomal protein S27-like [Source:HGNC Symbol,Acc:18476]};RPS27{ribosomal protein S27 [Source:HGNC Symbol,Acc:10416]}	3	1	2	3	1	1	38.1	13.1	13.1	9.4771	84	1	2	1.6984e-33	28.6	38.1
3305	24;6903;7186	IPI00748244	NP_003962;NP_001092755;NP_002814	ENSG00000008294;ENSG00000187514	SPAG9;PTMA	SPAG9{sperm associated antigen 9 [Source:HGNC Symbol,Acc:14524]};PTMA{prothymosin, alpha [Source:HGNC Symbol,Acc:9623]}	3	1	3	2	1	1	8.1	8.1	2.9	54.395	484	6	16	2.8903e-66	8.1	5.2
3306	15053	IPI00784224	NP_057191	ENSG00000056097	ZFR	ZFR{zinc finger RNA binding protein [Source:HGNC Symbol,Acc:17277]}	1	1	1	1	1	1	0.8	0.8	0.8	117.69	1079	2	3	0.0026316	0.8	0.8
3310	6530	IPI00759644					1	1	1	1	1	1	13.4	13.4	13.4	10.8	97	4	4	3.4172e-16	13.4	13.4
3311	1132;7023	IPI00760554		ENSG00000235657;ENSG00000227715	HLA-A	HLA-A{major histocompatibility complex, class I, A [Source:HGNC Symbol,Acc:4931]}	2	1	2	2	1	1	7.4	3.6	3.6	40.976	365	1	1	1.092e-11	7.4	7.4
3312	5815;13232	IPI00760748	NP_001137430;NP_060717	ENSG00000112697	TMEM30A	TMEM30A{transmembrane protein 30A [Source:HGNC Symbol,Acc:16667]}	2	1	2	2	1	1	8.7	8.7	5.4	27.728	242	4	4	7.5163e-20	8.7	8.7
3313	10005	IPI00761016	NP_060745	ENSG00000146826	C7orf43	C7orf43{chromosome 7 open reading frame 43 [Source:HGNC Symbol,Acc:25604]}	1	1	1	1	1	1	2.1	2.1	2.1	62.596	580	3	2	3.041e-07	2.1	2.1
3314	5852;19972	IPI00973172		ENSG00000211938	IGHV3-7	IGHV3-7{immunoglobulin heavy variable 3-7 [Source:HGNC Symbol,Acc:5620]}	2	1	0	2	0	1	12.8	5.6	5.6	13.819	125		4	1.3701e-07	0	12.8
3316	1547;4164;5854	IPI00783024					3	1	3	3	1	1	25.2	5.3	5.3	14.142	131	2	2	1.0811e-39	25.2	25.2
3328	15308	IPI00783872	NP_005889;NP_976240	ENSG00000135387	CAPRIN1	CAPRIN1{cell cycle associated protein 1 [Source:HGNC Symbol,Acc:6743]}	1	1	0	1	0	1	1.6	1.6	1.6	78.365	709		4	0.0001651	0	1.6
3337	8007;16353	IPI00784159	NP_997237	ENSG00000172932	ANKRD13D	ANKRD13D{ankyrin repeat domain 13 family, member D [Source:HGNC Symbol,Acc:27880]}	2	1	1	2	0	1	3.5	1.5	1.5	68.171	605		1	1.919e-19	2	3.5
3342	827;2583;3830;3831;4932;5850;6240;13692;16051;16846;17012;18661	IPI00785084		ENSG00000211896;ENSG00000211933;ENSG00000211936	IGHG1;IGHV6-1;IGHV4-4	IGHG1{immunoglobulin heavy constant gamma 1 (G1m marker) [Source:HGNC Symbol,Acc:5525]};IGHV6-1{immunoglobulin heavy variable 6-1 [Source:HGNC Symbol,Acc:5662]};IGHV4-4{immunoglobulin heavy variable 4-4 [Source:HGNC Symbol,Acc:5652]}	12	1	12	11	1	1	30.1	1.5	1.5	51.082	465	2	1	0	30.1	26.7
3349	17098	IPI00789529	NP_060569	ENSG00000064763	FAR2	FAR2{fatty acyl CoA reductase 2 [Source:HGNC Symbol,Acc:25531]}	1	1	1	1	1	1	2.1	2.1	2.1	59.438	515	4	4	6.4545e-05	2.1	2.1
3352	18282	IPI00829826	NP_004765	ENSG00000125686	MED1	MED1{mediator complex subunit 1 [Source:HGNC Symbol,Acc:9234]}	1	1	1	1	1	1	0.6	0.6	0.6	168.48	1581	6	5	9.6858e-06	0.6	0.6
3354	8002	IPI00828150	NP_001124384;NP_006695	ENSG00000165416	SUGT1	SUGT1{SGT1, suppressor of G2 allele of SKP1 (S. cerevisiae) [Source:HGNC Symbol,Acc:16987]}	1	1	0	1	0	1	4.1	4.1	4.1	41.024	365		1	0.0025524	0	4.1
3355	3910;5714;9060;10389;14507;16057;16122	IPI00792647		ENSG00000160285	LSS	LSS{lanosterol synthase (2,3-oxidosqualene-lanosterol cyclase) [Source:HGNC Symbol,Acc:6708]}	7	1	6	7	1	1	33.6	2.7	2.7	29.58	262	3	2	4.5543e-84	27.9	33.6
3368	4214	IPI00815976	NP_001074294	ENSG00000188735	TMEM120B	TMEM120B{transmembrane protein 120B [Source:HGNC Symbol,Acc:32008]}	1	1	1	1	1	1	5	5	5	40.245	339	6	3	5.0687e-24	5	5
3373	6059;13743	IPI01013214		ENSG00000224650	IGHV3-74	IGHV3-74{immunoglobulin heavy variable 3-74 [Source:HGNC Symbol,Acc:5624]}	2	1	1	2	1	1	14.8	5.7	5.7	13.432	122	1	3	0.00043003	5.7	14.8
3380	6872;9730;10827;12750	IPI00844078					4	1	4	3	1	1	14.3	3.1	3.1	26.269	223	3	2	2.0992e-13	14.3	10.3
3383	2211;19916	IPI00844539					2	1	2	2	1	1	9.3	3.3	3.3	20.763	182	1	1	2.0539e-05	9.3	9.3
3385	6207	IPI00953461	NP_055970	ENSG00000107929	LARP4B	LARP4B{La ribonucleoprotein domain family, member 4B [Source:HGNC Symbol,Acc:28987]}	1	1	1	1	1	1	2.3	2.3	2.3	80.551	738	1	5	4.6172e-30	2.3	2.3
3389	16878;18797	IPI00852709	NP_001092878	ENSG00000175766	EIF4E1B	EIF4E1B{eukaryotic translation initiation factor 4E family member 1B [Source:HGNC Symbol,Acc:33179]}	2	1	2	1	1	1	7.9	5	5	27.596	242	1	1	0.00041267	7.9	5
3393	5853	IPI00854743		ENSG00000211965	IGHV3-49	IGHV3-49{immunoglobulin heavy variable 3-49 [Source:HGNC Symbol,Acc:5607]}	1	1	1	1	1	1	7.6	7.6	7.6	13.104	119	2	2	6.5265e-06	7.6	7.6
3394	16718	IPI00855873	NP_001093859	ENSG00000170088	TMEM192	TMEM192{transmembrane protein 192 [Source:HGNC Symbol,Acc:26775]}	1	1	1	1	1	1	4.1	4.1	4.1	30.922	271	1	1	2.3948e-06	4.1	4.1
3396	15320	IPI00973375	NP_001096630;NP_001096631	ENSG00000189410	SH2D5	SH2D5{SH2 domain containing 5 [Source:HGNC Symbol,Acc:28819]}	1	1	1	1	1	1	3.3	3.3	3.3	46.796	423	1	1	5.3223e-07	3.3	3.3
3397	2;67;270;479;1152;1714;1728;2932;3321;3402;3525;3683;3725;3851;3945;4157;4167;5488;6182;6896;7024;7089;8692;8782;8926;9629;9657;9977;10198;10206;10298;10328;11395;11405;11414;11416;11417;11418;11419;11420;11755;11764;12082;12107;12406;12468;12476;13728;14269;14390;14438;14464;14537;15439;15482;15551;16072;16231;16743;16905;17457;17484;17606	IPI00856098		ENSG00000125844	RRBP1	RRBP1{ribosome binding protein 1 homolog 180kDa (dog) [Source:HGNC Symbol,Acc:10448]}	63	1	52	63	1	1	57.3	57.3	0.5	165.71	1540	177	520	0	52.3	57.3
3400	15074	IPI00869107	NP_001099040	ENSG00000213965	NUDT19	NUDT19{nudix (nucleoside diphosphate linked moiety X)-type motif 19 [Source:HGNC Symbol,Acc:32036]}	1	1	1	1	1	1	4.3	4.3	4.3	42.233	375	12	6	6.3691e-14	4.3	4.3
3416	4091;6061;8524;11142;11301;12793;19219	IPI00885016	NP_001193867;NP_001193870;NP_055534	ENSG00000198420	FAM115A	FAM115A{family with sequence similarity 115, member A [Source:HGNC Symbol,Acc:22201]}	7	1	5	6	0	1	7.9	0.8	0.8	101.89	919		2	4.1115e-48	6.3	6.7
3419	257;5788;6201;9903;12641;13086;15149;17007;19894	IPI00889723		ENSG00000228267;ENSG00000244731	C4A;C4B	C4A{complement component 4A (Rodgers blood group) [Source:HGNC Symbol,Acc:1323]};C4B{complement component 4B (Chido blood group) [Source:HGNC Symbol,Acc:1324]}	9	1	7	8	1	0	38.5	6.3	6.3	30.444	270	1		1.4594e-44	33.3	32.2
3421	1905;6051;7527;8277;14762;15201;17329;19421	IPI00893541		ENSG00000167004	PDIA3	PDIA3{protein disulfide isomerase family A, member 3 [Source:HGNC Symbol,Acc:4606]}	8	1	8	8	1	1	56.9	11.4	11.4	13.519	123	32	45	2.089e-120	56.9	56.9
3424	12706	IPI00896403					1	1	1	0	1	0	0.8	0.8	0.8	151.68	1318	1		0.012398	0.8	0
3426	14908	IPI00902744	NP_689645	ENSG00000165895	ARHGAP42	ARHGAP42{Rho GTPase activating protein 42 [Source:HGNC Symbol,Acc:26545]}	1	1	1	1	1	1	1	1	1	98.568	874	4	2	1.1131e-05	1	1
3429	2783	IPI00965684	NP_005822	ENSG00000136436	CALCOCO2	CALCOCO2{calcium binding and coiled-coil domain 2 [Source:HGNC Symbol,Acc:29912]}	1	1	1	1	1	1	2.1	2.1	2.1	61.241	533	1	1	0.0021711	2.1	2.1
3434	4044;4676;4919;7363;7595;11655;12851	IPI00910719		ENSG00000113407	TARS	TARS{threonyl-tRNA synthetase [Source:HGNC Symbol,Acc:11572]}	7	1	5	7	0	1	10.3	1	1	70.36	602		1	8.407e-27	7.3	10.3
3435	1175;1305;1702;4430;4536;9019;9271;9344;10538;10761;11018;11019;11689;13182;13244;13689;15131;15607;16022;17015;17472;19644	IPI00911039					22	1	22	21	1	1	38.9	1.5	1.5	63.923	586	12	10	1.1699e-268	38.9	35
3438	4163;9228;13743	IPI00916434					3	1	2	3	1	1	16.4	8	8	25.145	238	2	5	1.3501e-14	11.8	16.4
3440	551;1859;7873;10764;14642;15058;17016;18914;19679	IPI00921849					9	1	6	9	1	1	16.9	1.6	1.6	71.795	644	1	2	3.8069e-279	13.4	16.9
3442	18984	IPI00924556	NP_054760	ENSG00000114902	SPCS1	SPCS1{signal peptidase complex subunit 1 homolog (S. cerevisiae) [Source:HGNC Symbol,Acc:23401]}	1	1	1	1	1	1	10.1	10.1	10.1	18.298	169	1	2	4.6076e-07	10.1	10.1
3443	7221;19736	IPI00924815		ENSG00000160862	AZGP1	AZGP1{alpha-2-glycoprotein 1, zinc-binding [Source:HGNC Symbol,Acc:910]}	2	1	2	1	1	1	31.8	7.1	7.1	9.5977	85	2	3	8.7531e-41	31.8	7.1
3446	19904	IPI00927606	NP_000572	ENSG00000233276	GPX1	GPX1{glutathione peroxidase 1 [Source:HGNC Symbol,Acc:4553]}	1	1	1	1	1	1	8.4	8.4	8.4	22.041	203	4	3	1.1299e-38	8.4	8.4
3447	126;446;3217;6705;7109;8715;9090;9265;9552;11059;11062;12741;12746;13302	IPI00927799	NP_001091679;NP_001091680;NP_001895	ENSG00000168036	CTNNB1	CTNNB1{catenin (cadherin-associated protein), beta 1, 88kDa [Source:HGNC Symbol,Acc:2514]}	14	1	13	13	1	0	21.2	15.8	1.4	84.765	774	40	40	3.8237e-213	19	19.8
3448	434;12813	IPI00929313	NP_001139669	ENSG00000175820	C13orf40	C13orf40{chromosome 13 open reading frame 40 [Source:HGNC Symbol,Acc:26851]}	2	1	2	2	1	1	0.2	0.1	0.1	801.9	7081	2	5	0.0002464	0.2	0.2
3450	2583;6239;13692;16050;17013;18662	IPI00930442		ENSG00000211892	IGHG4	IGHG4{immunoglobulin heavy constant gamma 4 (G4m marker) [Source:HGNC Symbol,Acc:5528]}	6	1	4	6	0	1	16	3.6	3.6	52.42	476		2	5.6609e-75	9	16
3455	3122;3754;3811;4149;6603;7218;7260;7909;11642;14512;15093;15380;15929;16299;16516;17483;18306	IPI00939159					17	1	13	17	1	1	40.9	4.2	4.2	47.12	433	4	7	0	35.3	40.9
3456	5301	IPI00965068	NP_699197	ENSG00000165124	SVEP1	SVEP1{sushi, von Willebrand factor type A, EGF and pentraxin domain containing 1 [Source:HGNC Symbol,Acc:15985]}	1	1	1	1	1	1	0.4	0.4	0.4	390.54	3574	12	13	2.2698e-76	0.4	0.4
3458	253;307;3005;3081;6401;7605;7803;7937;10268;10986;11473;12117;12604;12750;15462;15483;17804;19828	IPI00940343	NP_001018007;NP_001018020	ENSG00000140416	TPM1	TPM1{tropomyosin 1 (alpha) [Source:HGNC Symbol,Acc:12010]}	18	1	17	17	1	1	48.5	2.1	2.1	37.452	326	1	3	4.7865e-112	48.5	42.3
3462	2751;3833;18785	IPI00941538		ENSG00000224608	HLA-B	HLA-B{major histocompatibility complex, class I, B [Source:HGNC Symbol,Acc:4932]}	3	1	1	3	1	1	10.6	5.3	5.3	47.981	434	5	9	4.2577e-09	5.3	10.6
3471	12752	IPI00967614	NP_003319	ENSG00000074966	TXK	TXK{TXK tyrosine kinase [Source:HGNC Symbol,Acc:12434]}	1	1	1	0	1	0	6	6	6	21.2	182	4		1.6682e-30	6	0
3473	4635;6540;11698;13085;16558;17178;17387	IPI00968128		ENSG00000163682	RPL9	RPL9{ribosomal protein L9 [Source:HGNC Symbol,Acc:10369]}	7	1	4	7	0	1	31.7	4.8	4.8	21.459	189		4	2.0017e-51	15.9	31.7
3474	5178	IPI00982652	NP_001988	ENSG00000149806	FAU	FAU{Finkel-Biskis-Reilly murine sarcoma virus (FBR-MuSV) ubiquitously expressed [Source:HGNC Symbol,Acc:3597]}	1	1	1	1	1	1	7.5	7.5	7.5	14.39	133	2	10	8.9171e-05	7.5	7.5
3479	15815;16968	IPI00980495	NP_001107047;NP_057592	ENSG00000006837	CDKL3	CDKL3{cyclin-dependent kinase-like 3 [Source:HGNC Symbol,Acc:15483]}	2	1	1	2	0	1	6.2	3	3	53.057	471		3	3.2864e-44	3.2	6.2
3491	83;338;576;1400;3365;5225;5844;6139;6562;8157;8662;10444;10607;10609;11442;12529;15241;16300;16692;17274;18327;18657	IPI01015181	NP_001093639	ENSG00000132305	IMMT	IMMT{inner membrane protein, mitochondrial [Source:HGNC Symbol,Acc:6047]}	22	1	15	21	1	1	31.8	31.8	3.2	83.548	757	31	104	5.5358e-203	22.1	31.7
30	2271;4489	IPI00000155	NP_115958	ENSG00000140632	GLYR1	GLYR1{glyoxylate reductase 1 homolog (Arabidopsis) [Source:HGNC Symbol,Acc:24434]}	2	2	1	2	1	2	4.9	4.9	4.9	62.185	569	2	4	2.2057e-07	1.9	4.9
35	8067;8068;14315	IPI00000643	NP_004273	ENSG00000112208	BAG2	BAG2{BCL2-associated athanogene 2 [Source:HGNC Symbol,Acc:938]}	3	2	1	2	1	1	13.7	13.7	13.7	23.772	211	1	7	3.476e-10	6.2	10.4
41	2560;17499	IPI00000783	NP_683720;NP_004150	ENSG00000230034;ENSG00000204264;ENSG00000206298;ENSG00000226201;ENSG00000230669;ENSG00000231631;ENSG00000235715;ENSG00000236443	PSMB8	PSMB8{proteasome (prosome, macropain) subunit, beta type, 8 (large multifunctional peptidase 7) [Source:HGNC Symbol,Acc:9545]}	2	2	1	2	1	2	10.1	10.1	10.1	30.354	276	2	2	4.4073e-07	5.1	10.1
48	3450;19580	IPI00000860	NP_002014	ENSG00000122176	FMOD	FMOD{fibromodulin [Source:HGNC Symbol,Acc:3774]}	2	2	2	2	2	2	5.1	5.1	5.1	43.178	376	2	5	5.1745e-05	5.1	5.1
73	16576;17182	IPI00619930	NP_001002019;NP_001002020;NP_079491	ENSG00000177192	PUS1	PUS1{pseudouridylate synthase 1 [Source:HGNC Symbol,Acc:15508]}	2	2	2	1	2	1	7	7	7	47.47	427	4	1	7.3913e-10	7	4.2
75	12515;18487	IPI00922511	NP_058642	ENSG00000158769	F11R	F11R{F11 receptor [Source:HGNC Symbol,Acc:14685]}	2	2	2	2	2	2	6.9	6.9	6.9	32.858	303	6	23	2.6879e-17	6.9	6.9
79	9804;16967	IPI00001871	NP_002574	ENSG00000177425	PAWR	PAWR{PRKC, apoptosis, WT1, regulator [Source:HGNC Symbol,Acc:8614]}	2	2	1	2	1	2	8.2	8.2	8.2	36.567	340	1	6	7.8405e-15	3.2	8.2
82	9578;14758	IPI00001922	NP_068813	ENSG00000149418	ST14	ST14{suppression of tumorigenicity 14 (colon carcinoma) [Source:HGNC Symbol,Acc:11344]}	2	2	2	1	2	1	3.3	3.3	3.3	94.769	855	4	3	2.3941e-06	3.3	1.6
83	2505;19171	IPI00001952	NP_055851	ENSG00000149218	ENDOD1	ENDOD1{endonuclease domain containing 1 [Source:HGNC Symbol,Acc:29129]}	2	2	2	2	2	2	4.2	4.2	4.2	55.016	500	19	17	1.7234e-09	4.2	4.2
85	1593;8263	IPI00001985	NP_065908	ENSG00000104142	VPS18	VPS18{vacuolar protein sorting 18 homolog (S. cerevisiae) [Source:HGNC Symbol,Acc:15972]}	2	2	2	2	2	2	1.8	1.8	1.8	110.18	973	8	12	4.3696e-05	1.8	1.8
87	3740;7844;10934;16996	IPI00002149	NP_001028675;NP_057187	ENSG00000152700	SAR1B	SAR1B{SAR1 homolog B (S. cerevisiae) [Source:HGNC Symbol,Acc:10535]}	4	2	4	4	2	2	21.2	11.6	11.6	22.41	198	3	6	2.451e-28	21.2	21.2
95	566;19391	IPI00002270	NP_078849	ENSG00000146476	C6orf211	C6orf211{chromosome 6 open reading frame 211 [Source:HGNC Symbol,Acc:17872]}	2	2	2	2	2	2	3.9	3.9	3.9	51.172	441	8	10	4.2084e-08	3.9	3.9
96	11271;17701	IPI00002276	NP_037400	ENSG00000105198	LGALS13	LGALS13{lectin, galactoside-binding, soluble, 13 [Source:HGNC Symbol,Acc:15449]}	2	2	2	2	2	2	12.9	12.9	12.9	16.118	139	9	10	2.8719e-33	12.9	12.9
97	3149;3972	IPI00002324	NP_037415;NP_877725	ENSG00000038274	MAT2B	MAT2B{methionine adenosyltransferase II, beta [Source:HGNC Symbol,Acc:6905]}	2	2	2	2	2	2	7.5	7.5	7.5	37.551	334	4	3	4.3176e-08	7.5	7.5
101	5790;9070	IPI00002408	NP_001139548;NP_078880	ENSG00000005175	RPAP3	RPAP3{RNA polymerase II associated protein 3 [Source:HGNC Symbol,Acc:26151]}	2	2	2	2	2	2	3.3	3.3	3.3	75.718	665	4	3	5.0655e-06	3.3	3.3
102	10300;11050	IPI00514424	NP_000301	ENSG00000131238	PPT1	PPT1{palmitoyl-protein thioesterase 1 [Source:HGNC Symbol,Acc:9325]}	2	2	1	2	1	2	10.4	10.4	10.4	37.131	335	4	7	1.6299e-71	5.1	10.4
109	870;10402;17236	IPI00002519	NP_004160;NP_683718	ENSG00000176974	SHMT1	SHMT1{serine hydroxymethyltransferase 1 (soluble) [Source:HGNC Symbol,Acc:10850]}	3	2	3	3	2	2	6.8	3.9	3.9	53.082	483	2	5	2.3022e-06	6.8	6.8
111	4424;14374	IPI00456008	NP_001003696;NP_001003697;NP_001003701;NP_001003703;NP_001676	ENSG00000154723	ATP5J	ATP5J{ATP synthase, H+ transporting, mitochondrial Fo complex, subunit F6 [Source:HGNC Symbol,Acc:847]}	2	2	1	2	1	2	25	25	25	13.388	116	1	9	5.5979e-07	12.1	25
115	8615;15399	IPI00337314	NP_758515;NP_001185522;NP_001185523;NP_001185524;NP_006864	ENSG00000068781;ENSG00000243244	STON1-GTF2A1L;STON1	STON1-GTF2A1L{STON1-GTF2A1L readthrough [Source:HGNC Symbol,Acc:30651]};STON1{stonin 1 [Source:HGNC Symbol,Acc:17003]}	2	2	2	2	2	2	1.6	1.6	1.6	132.08	1182	6	5	2.1341e-05	1.6	1.6
117	3339;9082;13705;15459;15616	IPI00002557					5	2	4	4	1	2	7	3.7	2.9	97.621	871	23	25	3.0369e-105	5.5	5.1
118	2541;6775	IPI01010850	NP_006288	ENSG00000073050	XRCC1	XRCC1{X-ray repair complementing defective repair in Chinese hamster cells 1 [Source:HGNC Symbol,Acc:12828]}	2	2	2	2	2	2	3.6	3.6	3.6	69.536	633	4	3	6.6633e-49	3.6	3.6
122	7177;11151	IPI00871903	NP_002660;NP_001188493	ENSG00000171566	PLRG1	PLRG1{pleiotropic regulator 1 (PRL1 homolog, Arabidopsis) [Source:HGNC Symbol,Acc:9089]}	2	2	2	2	2	2	3.3	3.3	3.3	57.181	514	3	2	4.207e-05	3.3	3.3
130	2955;3789;4995;8229;9170;10053;15185;16187;16595;18373;19841	IPI00002903	NP_066296	ENSG00000221826	PSG3	PSG3{pregnancy specific beta-1-glycoprotein 3 [Source:HGNC Symbol,Acc:9520]}	11	2	10	11	2	2	28.2	13.3	6.2	50.464	450	47	85	2.8689e-176	25.8	28.2
131	7112;16997	IPI00002922	NP_078941	ENSG00000177565	TBL1XR1	TBL1XR1{transducin (beta)-like 1 X-linked receptor 1 [Source:HGNC Symbol,Acc:29529]}	2	2	2	2	2	2	5.4	5.4	5.4	55.594	514	2	3	3.371e-05	5.4	5.4
133	7031;11864	IPI00793764	NP_078988	ENSG00000102890	ELMO3	ELMO3{engulfment and cell motility 3 [Source:HGNC Symbol,Acc:17289]}	2	2	2	1	2	1	1.3	1.3	1.3	87.101	773	15	9	4.3558e-05	1.3	1.2
139	10221;18756	IPI00003309	NP_006223	ENSG00000163882	POLR2H	POLR2H{polymerase (RNA) II (DNA directed) polypeptide H [Source:HGNC Symbol,Acc:9195]}	2	2	2	2	2	2	14.7	14.7	14.7	17.143	150	3	9	1.0421e-20	14.7	14.7
140	5958;9895	IPI00003326	NP_001658;NP_001186674	ENSG00000213465	ARL2	ARL2{ADP-ribosylation factor-like 2 [Source:HGNC Symbol,Acc:693]}	2	2	0	2	0	2	9.2	9.2	9.2	20.878	184		6	7.1589e-05	0	9.2
142	528;3537;9222;9531;11227;17691	IPI00003348	NP_005264;NP_002065	ENSG00000172354;ENSG00000078369	GNB2;GNB1	GNB2{guanine nucleotide binding protein (G protein), beta polypeptide 2 [Source:HGNC Symbol,Acc:4398]};GNB1{guanine nucleotide binding protein (G protein), beta polypeptide 1 [Source:HGNC Symbol,Acc:4396]}	6	2	6	6	2	2	18.2	18.2	5.3	37.331	340	22	43	5.9071e-47	18.2	18.2
147	3236;14458	IPI00003438	NP_055095	ENSG00000126698	DNAJC8	DNAJC8{DnaJ (Hsp40) homolog, subfamily C, member 8 [Source:HGNC Symbol,Acc:15470]}	2	2	1	2	1	2	10.7	10.7	10.7	29.841	253	1	4	3.8329e-33	4.3	10.7
154	922;18877	IPI00003588	NP_004271	ENSG00000124802	EEF1E1	EEF1E1{eukaryotic translation elongation factor 1 epsilon 1 [Source:HGNC Symbol,Acc:3212]}	2	2	2	1	2	1	12.6	12.6	12.6	19.81	174	8	3	1.6449e-25	12.6	6.9
156	2728;12846;13840	IPI00003704	NP_002887;NP_113680;NP_001185773;NP_001185772	ENSG00000173933;ENSG00000248643;ENSG00000173914	RBM14-RBM4;RBM4;RBM4B	RBM14-RBM4{RBM14-RBM4 readthrough [Source:HGNC Symbol,Acc:38840]};RBM4{RNA binding motif protein 4 [Source:HGNC Symbol,Acc:9901]};RBM4B{RNA binding motif protein 4B [Source:HGNC Symbol,Acc:28842]}	3	2	3	3	2	2	7.7	5.2	5.2	40.313	364	4	4	8.5278e-08	7.7	7.7
158	2660;3373;14778;17625	IPI00003783	NP_109587	ENSG00000126934	MAP2K2	MAP2K2{mitogen-activated protein kinase kinase 2 [Source:HGNC Symbol,Acc:6842]}	4	2	3	3	2	2	14	8.8	8.8	44.424	400	3	2	1.1768e-07	11	11.8
159	2976;13675	IPI00644697	NP_055135	ENSG00000051620	HEBP2	HEBP2{heme binding protein 2 [Source:HGNC Symbol,Acc:15716]}	2	2	1	2	1	2	10.3	10.3	10.3	24.029	214	4	6	8.5891e-39	6.1	10.3
165	11887;15874	IPI00217324	NP_680481;NP_055152;NP_680480	ENSG00000100023	PPIL2	PPIL2{peptidylprolyl isomerase (cyclophilin)-like 2 [Source:HGNC Symbol,Acc:9261]}	2	2	1	1	1	1	3.6	3.6	3.6	59.457	527	1	3	0.00028191	2.1	1.5
168	6082;9065	IPI00003848	NP_008965	ENSG00000162616	DNAJB4	DNAJB4{DnaJ (Hsp40) homolog, subfamily B, member 4 [Source:HGNC Symbol,Acc:14886]}	2	2	2	2	2	2	6.5	6.5	6.5	37.806	337	4	5	8.7623e-07	6.5	6.5
171	9776;19684	IPI00003870	NP_006003	ENSG00000125656	CLPP	CLPP{ClpP caseinolytic peptidase, ATP-dependent, proteolytic subunit homolog (E. coli) [Source:HGNC Symbol,Acc:2084]}	2	2	2	2	2	2	9.4	9.4	9.4	30.18	277	2	7	2.6357e-09	9.4	9.4
174	4713;11178;14558	IPI00922751	NP_703150;NP_008862	ENSG00000173262;ENSG00000059804	SLC2A14;SLC2A3	SLC2A14{solute carrier family 2 (facilitated glucose transporter), member 14 [Source:HGNC Symbol,Acc:18301]};SLC2A3{solute carrier family 2 (facilitated glucose transporter), member 3 [Source:HGNC Symbol,Acc:11007]}	3	2	3	3	2	2	6.5	5.4	5.4	58.249	535	11	17	4.0012e-77	6.5	6.5
179	4421;9172	IPI00003927	NP_005029	ENSG00000171497	PPID	PPID{peptidylprolyl isomerase D [Source:HGNC Symbol,Acc:9257]}	2	2	2	2	2	2	4.9	4.9	4.9	40.763	370	2	5	6.4637e-06	4.9	4.9
180	999;3564;4004;6704;7417;7447;7448;9185;11653;14529;15111	IPI00152785	NP_003518;NP_066406;NP_066402;NP_003519;NP_778225	ENSG00000196331;ENSG00000196226;ENSG00000124635;ENSG00000184678;ENSG00000196890	HIST1H2BO;HIST1H2BB;HIST1H2BJ;HIST2H2BE;HIST3H2BB	HIST1H2BO{histone cluster 1, H2bo [Source:HGNC Symbol,Acc:4758]};HIST1H2BB{histone cluster 1, H2bb [Source:HGNC Symbol,Acc:4751]};HIST1H2BJ{histone cluster 1, H2bj [Source:HGNC Symbol,Acc:4761]};HIST2H2BE{histone cluster 2, H2be [Source:HGNC Symbol,Acc:4760]};HIST3H2BB{histone cluster 3, H2bb [Source:HGNC Symbol,Acc:20514]}	11	2	11	11	2	2	63.5	7.9	7.9	13.906	126	26	25	2.41e-218	63.5	63.5
186	17080;17554	IPI00003985	NP_001073335;NP_004319	ENSG00000074582	BCS1L	BCS1L{BCS1-like (S. cerevisiae) [Source:HGNC Symbol,Acc:1020]}	2	2	2	2	2	2	6.7	6.7	6.7	47.534	419	5	5	9.9433e-16	6.7	6.7
189	9507;14577	IPI00218268	NP_005857;NP_671513	ENSG00000147955	SIGMAR1	SIGMAR1{sigma non-opioid intracellular receptor 1 [Source:HGNC Symbol,Acc:8157]}	2	2	1	2	1	2	8.5	8.5	8.5	25.127	223	1	5	9.8943e-12	5.8	8.5
197	2602;3312	IPI00946714	NP_001185838;NP_004222	ENSG00000128524	ATP6V1F	ATP6V1F{ATPase, H+ transporting, lysosomal 14kDa, V1 subunit F [Source:HGNC Symbol,Acc:16832]}	2	2	1	2	1	2	13.6	13.6	13.6	16.401	147	1	6	7.3853e-07	5.4	13.6
202	17461;18199	IPI00796379	NP_004039	ENSG00000166710	B2M	B2M{beta-2-microglobulin [Source:HGNC Symbol,Acc:914]}	2	2	2	2	2	2	16.4	16.4	16.4	13.946	122	2	11	0.00019849	16.4	16.4
206	2473;7404	IPI00004670	NP_004473	ENSG00000115339	GALNT3	GALNT3{UDP-N-acetyl-alpha-D-galactosamine:polypeptide N-acetylgalactosaminyltransferase 3 (GalNAc-T3) [Source:HGNC Symbol,Acc:4125]}	2	2	2	2	2	2	3.2	3.2	3.2	72.609	633	4	3	0.00016001	3.2	3.2
222	7173;9122	IPI00005102	NP_004586	ENSG00000102172	SMS	SMS{spermine synthase [Source:HGNC Symbol,Acc:11123]}	2	2	1	2	1	2	5.2	5.2	5.2	41.268	366	1	5	3.7139e-08	3	5.2
235	15305;15509	IPI00005277	NP_004575	ENSG00000172613	RAD9A	RAD9A{RAD9 homolog A (S. pombe) [Source:HGNC Symbol,Acc:9827]}	2	2	2	2	2	2	4.9	4.9	4.9	42.547	391	6	6	5.2126e-06	4.9	4.9
236	1057;10751	IPI00005490	NP_071413	ENSG00000113384	GOLPH3	GOLPH3{golgi phosphoprotein 3 (coat-protein) [Source:HGNC Symbol,Acc:15452]}	2	2	2	1	2	1	9.7	9.7	9.7	33.81	298	2	1	0.00019654	9.7	4.4
240	9446;19114	IPI00005573	NP_055410	ENSG00000125458	NT5C	NT5C{5', 3'-nucleotidase, cytosolic [Source:HGNC Symbol,Acc:17144]}	2	2	2	2	2	2	10.9	10.9	10.9	23.382	201	3	6	1.8603e-13	10.9	10.9
245	6635;7690;14492	IPI00644708	NP_001029097;NP_003243	ENSG00000151923	TIAL1	TIAL1{TIA1 cytotoxic granule-associated RNA binding protein-like 1 [Source:HGNC Symbol,Acc:11804]}	3	2	3	3	2	2	10.5	7.1	7.1	43.448	392	3	8	3.428e-42	10.5	10.5
249	5216;12806	IPI00005711	NP_006035	ENSG00000094631	HDAC6	HDAC6{histone deacetylase 6 [Source:HGNC Symbol,Acc:14064]}	2	2	1	2	1	2	1.5	1.5	1.5	132.78	1229	9	7	2.8669e-05	0.5	1.5
253	16177;18104	IPI00005740	NP_001135760;NP_006058	ENSG00000131148	COX4NB	COX4NB{COX4 neighbor [Source:HGNC Symbol,Acc:7864]}	2	2	1	2	1	2	13.3	13.3	13.3	23.773	210	2	5	5.718e-32	7.6	13.3
256	9634;16946	IPI00977968	NP_004634	ENSG00000100836	PABPN1	PABPN1{poly(A) binding protein, nuclear 1 [Source:HGNC Symbol,Acc:8565]}	2	2	2	2	2	2	6.3	6.3	6.3	37.198	333	3	8	9.6155e-07	6.3	6.3
258	1494;16945	IPI00005914	NP_037408	ENSG00000197417	SHPK	SHPK{sedoheptulokinase [Source:HGNC Symbol,Acc:1492]}	2	2	2	2	2	2	4.6	4.6	4.6	51.49	478	3	3	9.0749e-05	4.6	4.6
263	11658;16599	IPI00006006	NP_055513	ENSG00000196187	TMEM63A	TMEM63A{transmembrane protein 63A [Source:HGNC Symbol,Acc:29118]}	2	2	2	2	2	2	2.2	2.2	2.2	92.125	807	2	4	3.9132e-05	2.2	2.2
279	7461;14825	IPI00006203	NP_001164606;NP_001164607;NP_004720	ENSG00000214717	ZBED1	ZBED1{zinc finger, BED-type containing 1 [Source:HGNC Symbol,Acc:447]}	2	2	2	2	2	2	2.7	2.7	2.7	78.155	694	8	5	1.1224e-06	2.7	2.7
287	8106;10358	IPI00006443	NP_057058	ENSG00000165475	CRYL1	CRYL1{crystallin, lambda 1 [Source:HGNC Symbol,Acc:18246]}	2	2	1	2	1	2	6.3	6.3	6.3	35.419	319	3	7	0.00045766	3.4	6.3
290	5695;8172	IPI00006552	NP_037486;NP_473367	ENSG00000198791	CNOT7	CNOT7{CCR4-NOT transcription complex, subunit 7 [Source:HGNC Symbol,Acc:14101]}	2	2	1	2	1	2	8.4	8.4	8.4	32.745	285	5	5	2.5388e-06	3.5	8.4
308	5202;8265	IPI00006723	NP_004805	ENSG00000060688	SNRNP40	SNRNP40{small nuclear ribonucleoprotein 40kDa (U5) [Source:HGNC Symbol,Acc:30857]}	2	2	2	2	2	2	5.1	5.1	5.1	44.516	409	5	3	7.1876e-07	5.1	5.1
311	7464;9827	IPI00006754	NP_005819	ENSG00000136485	DCAF7	DCAF7{DDB1 and CUL4 associated factor 7 [Source:HGNC Symbol,Acc:30915]}	2	2	1	2	1	2	6.1	6.1	6.1	38.926	342	1	5	9.735e-25	2.3	6.1
314	198;3902	IPI00006952	NP_057111	ENSG00000147592	LACTB2	LACTB2{lactamase, beta 2 [Source:HGNC Symbol,Acc:18512]}	2	2	2	2	2	2	9.4	9.4	9.4	32.805	288	3	3	4.1047e-06	9.4	9.4
315	4876;7144	IPI00006970	NP_057118	ENSG00000122140	MRPS2	MRPS2{mitochondrial ribosomal protein S2 [Source:HGNC Symbol,Acc:14495]}	2	2	2	2	2	2	5.6	5.6	5.6	35.552	319	6	4	6.1923e-05	5.6	5.6
317	11167;14910	IPI00006987	NP_065147	ENSG00000089737	DDX24	DDX24{DEAD (Asp-Glu-Ala-Asp) box polypeptide 24 [Source:HGNC Symbol,Acc:13266]}	2	2	2	2	2	2	2.1	2.1	2.1	96.331	859	3	5	1.4636e-13	2.1	2.1
321	15038;18310	IPI00007061	NP_057156	ENSG00000111711	GOLT1B	GOLT1B{golgi transport 1B [Source:HGNC Symbol,Acc:20175]}	2	2	2	2	2	2	10.9	10.9	10.9	15.425	138	32	32	2.7189e-74	10.9	10.9
326	4717;12231	IPI00007118	NP_000593;NP_001158885	ENSG00000106366	SERPINE1	SERPINE1{serpin peptidase inhibitor, clade E (nexin, plasminogen activator inhibitor type 1), member 1 [Source:HGNC Symbol,Acc:8583]}	2	2	2	2	2	2	5.2	5.2	5.2	45.059	402	3	2	9.0822e-07	5.2	5.2
339	12256;18885	IPI00007253	NP_055754	ENSG00000153339	TRAPPC8	TRAPPC8{trafficking protein particle complex 8 [Source:HGNC Symbol,Acc:29169]}	2	2	2	1	2	1	1.4	1.4	1.4	161	1435	3	3	6.9788e-05	1.4	0.6
342	5559;17932	IPI00007280	NP_005708	ENSG00000162704	ARPC5	ARPC5{actin related protein 2/3 complex, subunit 5, 16kDa [Source:HGNC Symbol,Acc:708]}	2	2	2	2	2	2	16.2	16.2	16.2	16.631	154	3	8	2.7946e-81	16.2	16.2
343	11751;17531	IPI00007306	NP_006315	ENSG00000153774	CFDP1	CFDP1{craniofacial development protein 1 [Source:HGNC Symbol,Acc:1873]}	2	2	0	2	0	2	7.4	7.4	7.4	33.592	299		6	7.2388e-20	0	7.4
344	4063;19625	IPI00640747	NP_006318	ENSG00000204152;ENSG00000138297	TIMM23B;TIMM23	TIMM23B{translocase of inner mitochondrial membrane 23 homolog B (yeast) [Source:HGNC Symbol,Acc:23581]};TIMM23{translocase of inner mitochondrial membrane 23 homolog (yeast) [Source:HGNC Symbol,Acc:17312]}	2	2	2	2	2	2	10.9	10.9	10.9	28.048	257	2	7	4.241e-19	10.9	10.9
346	7430;16740	IPI00007321	NP_006321	ENSG00000120992	LYPLA1	LYPLA1{lysophospholipase I [Source:HGNC Symbol,Acc:6737]}	2	2	2	2	2	2	9.5	9.5	9.5	28.279	263	14	9	8.1938e-36	9.5	9.5
359	459;13646	IPI00980491	NP_057230	ENSG00000196655	TRAPPC4	TRAPPC4{trafficking protein particle complex 4 [Source:HGNC Symbol,Acc:19943]}	2	2	2	2	2	2	9.7	9.7	9.7	28.818	257	2	3	0.0004639	9.7	9.7
364	4591;18202	IPI00007755	NP_055814	ENSG00000080371	RAB21	RAB21{RAB21, member RAS oncogene family [Source:HGNC Symbol,Acc:18263]}	2	2	1	2	1	2	10.2	10.2	10.2	24.347	225	23	29	2.7824e-35	4.4	10.2
365	12682;15942	IPI00384857	NP_001002032;NP_001002033;NP_057269	ENSG00000189159	HN1	HN1{hematological and neurological expressed 1 [Source:HGNC Symbol,Acc:14569]}	2	2	0	2	0	2	18.2	18.2	18.2	19.916	181		8	7.2717e-10	0	18.2
367	5620;10026;12438;14835	IPI00007812	NP_001684	ENSG00000147416	ATP6V1B2	ATP6V1B2{ATPase, H+ transporting, lysosomal 56/58kDa, V1 subunit B2 [Source:HGNC Symbol,Acc:854]}	4	2	4	4	2	2	11.9	11.9	4.9	56.5	511	12	13	1.7631e-144	11.9	11.9
372	8791;8792	IPI00967902	NP_006434;NP_954653	ENSG00000112667	C6orf108	C6orf108{chromosome 6 open reading frame 108 [Source:HGNC Symbol,Acc:21218]}	2	2	2	2	2	2	4.5	4.5	4.5	25.868	243	7	6	0.00011692	4.5	4.5
377	14445;15392	IPI00007943	NP_006454;NP_964010;NP_998787	ENSG00000124356	STAMBP	STAMBP{STAM binding protein [Source:HGNC Symbol,Acc:16950]}	2	2	1	2	1	2	5.7	5.7	5.7	48.076	424	2	3	6.3008e-50	4	5.7
380	16620;18568	IPI00008034	NP_057361;NP_899050	ENSG00000112210	RAB23	RAB23{RAB23, member RAS oncogene family [Source:HGNC Symbol,Acc:14263]}	2	2	1	2	1	2	10.5	10.5	10.5	26.659	237	1	3	0.00085563	6.8	10.5
388	9904;18323	IPI00008248	NP_057322;NP_001131136	ENSG00000196510	ANAPC7	ANAPC7{anaphase promoting complex subunit 7 [Source:HGNC Symbol,Acc:17380]}	2	2	2	2	2	2	3.2	3.2	3.2	66.855	599	3	6	2.7287e-06	3.2	3.2
400	6786;8297	IPI00790010	NP_057399	ENSG00000144366	GULP1	GULP1{GULP, engulfment adaptor PTB domain containing 1 [Source:HGNC Symbol,Acc:18649]}	2	2	2	2	2	2	4.9	4.9	4.9	34.49	304	4	3	0.00075747	4.9	4.9
401	12004;12904	IPI00008475	NP_001091742;NP_002121	ENSG00000112972	HMGCS1	HMGCS1{3-hydroxy-3-methylglutaryl-CoA synthase 1 (soluble) [Source:HGNC Symbol,Acc:5007]}	2	2	2	2	2	2	3.8	3.8	3.8	57.293	520	2	6	9.6476e-05	3.8	3.8
405	52;9834;11606	IPI00008527	NP_000994	ENSG00000137818	RPLP1	RPLP1{ribosomal protein, large, P1 [Source:HGNC Symbol,Acc:10372]}	3	2	3	3	2	2	34.2	19.3	19.3	11.514	114	39	44	7.1042e-152	34.2	34.2
414	9325;12527	IPI00008708	NP_056474	ENSG00000171490	RSL1D1	RSL1D1{ribosomal L1 domain containing 1 [Source:HGNC Symbol,Acc:24534]}	2	2	1	2	1	2	3.9	3.9	3.9	54.972	490	1	12	1.1419e-05	1.6	3.9
416	10118;15346	IPI00008728	NP_006651	ENSG00000166855	CLPX	CLPX{ClpX caseinolytic peptidase X homolog (E. coli) [Source:HGNC Symbol,Acc:2088]}	2	2	1	1	1	1	4.4	4.4	4.4	69.223	633	1	2	8.7206e-05	2.4	2.1
417	3350;4710;11539	IPI00008787	NP_000254	ENSG00000108784	NAGLU	NAGLU{N-acetylglucosaminidase, alpha [Source:HGNC Symbol,Acc:7632]}	3	2	2	2	2	1	4.7	4.7	3.8	82.265	743	5	5	2.6513e-10	3.8	2.4
418	3591;15827	IPI00008821	NP_057407	ENSG00000138646	HERC5	HERC5{hect domain and RLD 5 [Source:HGNC Symbol,Acc:24368]}	2	2	1	2	1	2	2.4	2.4	2.4	116.85	1024	1	2	1.5038e-09	0.8	2.4
424	434;594;8175	IPI00008986	NP_003477	ENSG00000103257	SLC7A5	SLC7A5{solute carrier family 7 (cationic amino acid transporter, y+ system), member 5 [Source:HGNC Symbol,Acc:11063]}	3	2	2	3	1	2	5.3	5.3	4.1	55.01	507	5	12	1.5756e-07	2.6	5.3
426	5962;10041	IPI00216172	NP_001116078;NP_002285;NP_054701	ENSG00000005893	LAMP2	LAMP2{lysosomal-associated membrane protein 2 [Source:HGNC Symbol,Acc:6501]}	2	2	2	2	2	2	4.9	4.9	4.9	45.17	411	8	13	7.434e-20	4.9	4.9
429	5545;19594	IPI00074587	NP_473357;NP_001177934;NP_006616;NP_001177936;NP_001177935;NP_001177938	ENSG00000188529;ENSG00000215699	BX511012.1;SRSF10	BX511012.1{Serine/arginine-rich splicing factor 10 [Source:UniProtKB/Swiss-Prot,Acc:O75494]};SRSF10{serine/arginine-rich splicing factor 10 [Source:HGNC Symbol,Acc:16713]}	2	2	2	2	2	2	8.8	8.8	8.8	31.3	262	10	17	1.4095e-15	8.8	8.8
434	12069;19943	IPI00009198	NP_006519	ENSG00000105825	TFPI2	TFPI2{tissue factor pathway inhibitor 2 [Source:HGNC Symbol,Acc:11761]}	2	2	2	2	2	2	6.8	6.8	6.8	26.934	235	5	12	2.7155e-36	6.8	6.8
441	667;5972	IPI00963908	NP_005462	ENSG00000113552	GNPDA1	GNPDA1{glucosamine-6-phosphate deaminase 1 [Source:HGNC Symbol,Acc:4417]}	2	2	2	2	2	2	9.7	9.7	9.7	32.381	290	2	4	6.8793e-23	9.7	9.7
443	10277;11669;16327	IPI00514173	NP_001181936;NP_006103;NP_982281	ENSG00000084072	PPIE	PPIE{peptidylprolyl isomerase E (cyclophilin E) [Source:HGNC Symbol,Acc:9258]}	3	2	2	3	1	2	7.3	5.1	5.1	34.991	314	1	3	5.64e-06	5.4	7.3
444	9167;12759	IPI00009319	NP_057537;NP_909119	ENSG00000213672	NCKIPSD	NCKIPSD{NCK interacting protein with SH3 domain [Source:HGNC Symbol,Acc:15486]}	2	2	2	2	2	2	2.6	2.6	2.6	78.959	722	6	9	2.6628e-11	2.6	2.6
445	13993;19335	IPI00216919	NP_001123617;NP_001181974;NP_001181973	ENSG00000137693	YAP1	YAP1{Yes-associated protein 1 [Source:HGNC Symbol,Acc:16262]}	2	2	1	2	1	2	6.7	6.7	6.7	54.461	504	2	3	4.5274e-12	3.2	6.7
448	1096;9306	IPI00009335	NP_057542	ENSG00000235173;ENSG00000230567	FAM203A;FAM203B	FAM203A{family with sequence similarity 203, member A [Source:HGNC Symbol,Acc:24161]};FAM203B{family with sequence similarity 203, member B [Source:HGNC Symbol,Acc:32323]}	2	2	2	2	2	2	6.7	6.7	6.7	42.129	390	5	4	9.6867e-22	6.7	6.7
453	634;1487	IPI00009410	NP_079467	ENSG00000116406	EDEM3	EDEM3{ER degradation enhancer, mannosidase alpha-like 3 [Source:HGNC Symbol,Acc:16787]}	2	2	2	2	2	2	2.1	2.1	2.1	104.66	932	4	9	2.5512e-07	2.1	2.1
455	12785;14664	IPI00009464	NP_001001998	ENSG00000171824	EXOSC10	EXOSC10{exosome component 10 [Source:HGNC Symbol,Acc:9138]}	2	2	2	2	2	2	2.9	2.9	2.9	100.83	885	2	2	3.3492e-06	2.9	2.9
467	11942;13540	IPI00550977	NP_073615	ENSG00000130695	CEP85	CEP85{centrosomal protein 85kDa [Source:HGNC Symbol,Acc:25309]}	2	2	1	2	1	2	2.4	2.4	2.4	85.638	762	2	4	3.4622e-05	1.2	2.4
483	555;14796	IPI00009931	NP_112496	ENSG00000119431	HDHD3	HDHD3{haloacid dehalogenase-like hydrolase domain containing 3 [Source:HGNC Symbol,Acc:28171]}	2	2	2	2	2	2	11.2	11.2	11.2	28	251	11	4	1.9066e-32	11.2	11.2
485	15932;17946	IPI00009946	NP_006800	ENSG00000025772	TOMM34	TOMM34{translocase of outer mitochondrial membrane 34 [Source:HGNC Symbol,Acc:15746]}	2	2	1	1	1	1	8.4	8.4	8.4	34.559	309	1	4	1.4615e-10	4.9	3.6
489	11401;15632	IPI00009976	NP_006849	ENSG00000099203	TMED1	TMED1{transmembrane emp24 protein transport domain containing 1 [Source:HGNC Symbol,Acc:17291]}	2	2	2	2	2	2	11.5	11.5	11.5	25.206	227	4	9	5.9986e-10	11.5	11.5
493	13755;17957	IPI00010136	NP_073713;NP_001077383;NP_001320	ENSG00000175029	CTBP2	CTBP2{C-terminal binding protein 2 [Source:HGNC Symbol,Acc:2495]}	2	2	1	2	1	2	2.7	2.7	2.7	106.19	985	8	8	6.2439e-92	1.8	2.7
496	2559;4601	IPI00892779	NP_002279;NP_067154	ENSG00000167618	LAIR2	LAIR2{leukocyte-associated immunoglobulin-like receptor 2 [Source:HGNC Symbol,Acc:6478]}	2	2	2	2	2	2	10.6	10.6	10.6	23.002	208	2	4	0.00048771	10.6	10.6
497	1779;5093	IPI00010142	NP_001189418;NP_003334;NP_872630	ENSG00000184787	UBE2G2	UBE2G2{ubiquitin-conjugating enzyme E2G 2 (UBC7 homolog, yeast) [Source:HGNC Symbol,Acc:12483]}	2	2	2	1	2	1	13.9	13.9	13.9	18.566	165	2	1	2.064e-05	13.9	9.1
504	4397;16570	IPI00010218		ENSG00000119004	CYP20A1	CYP20A1{cytochrome P450, family 20, subfamily A, polypeptide 1 [Source:HGNC Symbol,Acc:20576]}	2	2	2	2	2	2	5.3	5.3	5.3	49.533	435	3	3	3.5411e-07	5.3	5.3
506	5324;19769	IPI00010252	NP_056990;NP_148980	ENSG00000197323	TRIM33	TRIM33{tripartite motif containing 33 [Source:HGNC Symbol,Acc:16290]}	2	2	2	2	2	2	1.9	1.9	1.9	122.53	1127	4	6	4.6123e-14	1.9	1.9
511	18468;19739	IPI00010346	NP_065777	ENSG00000123213	NLN	NLN{neurolysin (metallopeptidase M3 family) [Source:HGNC Symbol,Acc:16058]}	2	2	1	2	1	2	2.8	2.8	2.8	80.651	704	3	6	2.2792e-06	1.3	2.8
515	608;10361	IPI00955848	NP_112576	ENSG00000142669	SH3BGRL3	SH3BGRL3{SH3 domain binding glutamic acid-rich protein like 3 [Source:HGNC Symbol,Acc:15568]}	2	2	1	2	1	2	10.1	10.1	10.1	26.819	257	2	3	8.9815e-08	7.4	10.1
516	18872;19522	IPI00010404	NP_112577	ENSG00000169976	SF3B5	SF3B5{splicing factor 3b, subunit 5, 10kDa [Source:HGNC Symbol,Acc:21083]}	2	2	2	2	2	2	23.3	23.3	23.3	10.135	86	21	28	1.4573e-23	23.3	23.3
517	5757;18719	IPI00010414	NP_066272	ENSG00000107438	PDLIM1	PDLIM1{PDZ and LIM domain 1 [Source:HGNC Symbol,Acc:2067]}	2	2	2	2	2	2	7.6	7.6	7.6	36.071	329	3	3	6.6e-14	7.6	7.6
521	8839;13141;16214	IPI00010449		ENSG00000118197	DDX59	DDX59{DEAD (Asp-Glu-Ala-Asp) box polypeptide 59 [Source:HGNC Symbol,Acc:25360]}	3	2	2	3	1	2	4.3	3.3	3.3	64.571	580	6	7	6.8512e-06	2.9	4.3
533	15526;15817	IPI00010800	NP_006608	ENSG00000132688	NES	NES{nestin [Source:HGNC Symbol,Acc:7756]}	2	2	1	2	1	2	1.4	1.4	1.4	177.44	1621	1	8	2.228e-10	0.7	1.4
535	216;2014	IPI00165587	NP_006490;NP_963839;NP_963837;NP_963838	ENSG00000116977	LGALS8	LGALS8{lectin, galactoside-binding, soluble, 8 [Source:HGNC Symbol,Acc:6569]}	2	2	2	2	2	2	5.3	5.3	5.3	40.397	359	3	5	4.628e-06	5.3	5.3
538	4067;10235	IPI00010882	NP_004392;NP_998731	ENSG00000160049	DFFA	DFFA{DNA fragmentation factor, 45kDa, alpha polypeptide [Source:HGNC Symbol,Acc:2772]}	2	2	1	2	1	2	8.8	8.8	8.8	36.521	331	2	4	1.2996e-31	3.6	8.8
547	14118;18938	IPI00877716	NP_001191169;NP_114143	ENSG00000099992;ENSG00000248751	TBC1D10A;RP1-130H16.18	TBC1D10A{TBC1 domain family, member 10A [Source:HGNC Symbol,Acc:23609]};RP1-130H16.18{}	2	2	2	2	2	2	3.5	3.5	3.5	57.934	515	6	5	4.8431e-05	3.5	3.5
553	18978;19494	IPI00011250	NP_005993	ENSG00000118939	UCHL3	UCHL3{ubiquitin carboxyl-terminal esterase L3 (ubiquitin thiolesterase) [Source:HGNC Symbol,Acc:12515]}	2	2	2	2	2	2	10.9	10.9	10.9	26.182	230	3	5	1.0371e-30	10.9	10.9
557	8566;13019	IPI00011276	NP_000047;NP_898871	ENSG00000083123	BCKDHB	BCKDHB{branched chain keto acid dehydrogenase E1, beta polypeptide [Source:HGNC Symbol,Acc:987]}	2	2	2	1	2	1	7.1	7.1	7.1	43.122	392	5	2	6.1469e-07	7.1	2.8
562	289;347;754;1730;1802;1901;1942;2420;2641;3228;3840;4533;5933;6855;7727;7774;9209;10460;10879;12110;12996;13442;13639;14157;14579;14688;15358;15643;17940;18217;18256;18479;18618;18619;19166;19357	IPI00011454	NP_938149	ENSG00000089597	GANAB	GANAB{glucosidase, alpha, neutral AB [Source:HGNC Symbol,Acc:4138]}	36	2	35	34	2	2	43.5	43.5	3.1	109.44	966	215	324	0	42.8	39.6
565	6673;6956;7459	IPI00011550	NP_149080	ENSG00000177764	ZCCHC3	ZCCHC3{zinc finger, CCHC domain containing 3 [Source:HGNC Symbol,Acc:16230]}	3	2	3	3	2	2	5.9	5.9	4.5	43.618	404	14	8	3.4761e-12	5.9	5.9
570	13143;15154	IPI00011604	NP_004474	ENSG00000140905	GCSH	GCSH{glycine cleavage system protein H (aminomethyl carrier) [Source:HGNC Symbol,Acc:4208]}	2	2	2	2	2	2	17.3	17.3	17.3	18.884	173	8	21	1.7865e-67	17.3	17.3
575	5346;18093	IPI00011676	NP_003932	ENSG00000106299	WASL	WASL{Wiskott-Aldrich syndrome-like [Source:HGNC Symbol,Acc:12735]}	2	2	0	2	0	2	3.4	3.4	3.4	54.826	505		6	3.476e-05	0	3.4
577	1947;4726	IPI00011736	NP_005018	ENSG00000105647	PIK3R2	PIK3R2{phosphoinositide-3-kinase, regulatory subunit 2 (beta) [Source:HGNC Symbol,Acc:8980]}	2	2	1	2	1	2	2.1	2.1	2.1	81.544	728	1	4	0.00034163	1.1	2.1
581	4798;19215	IPI00011898	NP_003898	ENSG00000145191	EIF2B5	EIF2B5{eukaryotic translation initiation factor 2B, subunit 5 epsilon, 82kDa [Source:HGNC Symbol,Acc:3261]}	2	2	2	2	2	2	2.2	2.2	2.2	80.379	721	14	13	8.4911e-07	2.2	2.2
582	5592;8216;8315;11985	IPI00011913	NP_006796	ENSG00000177733	HNRNPA0	HNRNPA0{heterogeneous nuclear ribonucleoprotein A0 [Source:HGNC Symbol,Acc:5030]}	4	2	3	4	1	2	12.8	10.2	10.2	30.84	305	4	8	2.3378e-67	7.5	12.8
585	5756;8646	IPI00011996	NP_075567	ENSG00000159202	UBE2Z	UBE2Z{ubiquitin-conjugating enzyme E2Z [Source:HGNC Symbol,Acc:25847]}	2	2	2	2	2	2	7.3	7.3	7.3	38.21	354	7	6	1.1638e-21	7.3	7.3
595	9223;18689	IPI00012202	NP_077007	ENSG00000116455	WDR77	WDR77{WD repeat domain 77 [Source:HGNC Symbol,Acc:29652]}	2	2	2	2	2	2	6.1	6.1	6.1	36.724	342	12	13	5.299e-52	6.1	6.1
602	9509;13962;18454	IPI00012341	NP_001034554;NP_008856	ENSG00000100650	SRSF5	SRSF5{serine/arginine-rich splicing factor 5 [Source:HGNC Symbol,Acc:10787]}	3	2	2	3	1	2	11	7.7	7.7	31.263	272	1	6	6.3611e-06	8.5	11
608	6380;9582	IPI00945835	NP_003886;NP_001153778;NP_982271;NP_001153774	ENSG00000159082	SYNJ1	SYNJ1{synaptojanin 1 [Source:HGNC Symbol,Acc:11503]}	2	2	2	2	2	2	2	2	2	177.55	1612	4	4	5.6973e-12	2	2
616	8574;19363	IPI00012497	NP_001610	ENSG00000173020	ADRBK1	ADRBK1{adrenergic, beta, receptor kinase 1 [Source:HGNC Symbol,Acc:289]}	2	2	2	2	2	2	2.2	2.2	2.2	79.573	689	9	7	6.2883e-07	2.2	2.2
618	7693;11714	IPI00012510	NP_114437	ENSG00000132205	EMILIN2	EMILIN2{elastin microfibril interfacer 2 [Source:HGNC Symbol,Acc:19881]}	2	2	1	2	1	2	2.4	2.4	2.4	115.69	1053	2	7	3.0809e-08	1.3	2.4
619	6326;7773;13029	IPI00012512	NP_001096139;NP_001170786;NP_036382;NP_001170785	ENSG00000133818	RRAS2	RRAS2{related RAS viral (r-ras) oncogene homolog 2 [Source:HGNC Symbol,Acc:17271]}	3	2	1	3	1	2	17.1	9.5	9.5	24.195	210	1	4	2.0227e-96	5.7	17.1
623	849;1712;4079;10656;11143;17712;19124	IPI00012645	NP_008877	ENSG00000173898	SPTBN2	SPTBN2{spectrin, beta, non-erythrocytic 2 [Source:HGNC Symbol,Acc:11276]}	7	2	4	7	1	2	2.6	0.5	0.5	271.32	2390	9	10	5.1387e-16	1.5	2.6
625	12208;18956	IPI00012728	NP_001986	ENSG00000151726	ACSL1	ACSL1{acyl-CoA synthetase long-chain family member 1 [Source:HGNC Symbol,Acc:3569]}	2	2	2	2	2	2	2.9	2.9	2.9	77.942	698	5	3	2.9826e-11	2.9	2.9
651	12485;19502	IPI00922484	NP_003901	ENSG00000106245	BUD31	BUD31{BUD31 homolog (S. cerevisiae) [Source:HGNC Symbol,Acc:29629]}	2	2	2	1	2	1	12.4	12.4	12.4	17.331	145	13	9	2.9165e-07	12.4	6.9
652	7268;10960	IPI00013184	NP_003482	ENSG00000102030	NAA10	NAA10{N(alpha)-acetyltransferase 10, NatA catalytic subunit [Source:HGNC Symbol,Acc:18704]}	2	2	1	2	1	2	7.7	7.7	7.7	26.458	235	2	9	1.2837e-05	3.4	7.7
653	9574;10512	IPI00013212	NP_001120662;NP_004374	ENSG00000103653	CSK	CSK{c-src tyrosine kinase [Source:HGNC Symbol,Acc:2444]}	2	2	2	2	2	2	5.1	5.1	5.1	50.704	450	8	6	8.3775e-09	5.1	5.1
657	7058;13346	IPI00013271	NP_077271;NP_001128143	ENSG00000136986	DERL1	DERL1{Der1-like domain family, member 1 [Source:HGNC Symbol,Acc:28454]}	2	2	2	2	2	2	7.6	7.6	7.6	28.8	251	11	18	1.2262e-05	7.6	7.6
673	10565;19690	IPI00013678	NP_002446	ENSG00000173171	MTX1	MTX1{metaxin 1 [Source:HGNC Symbol,Acc:7504]}	2	2	0	2	0	2	5.6	5.6	5.6	51.476	466		8	1.0949e-05	0	5.6
675	795;906;3613;4946;5795;7635;9800;10446;11900;13114;13716;15334;19613	IPI01013705	NP_001184110;NP_006077	ENSG00000198211	TUBB3	TUBB3{tubulin, beta 3 [Source:HGNC Symbol,Acc:20772]}	13	2	12	12	1	1	34.9	7.8	5.8	50.404	450	4	9	0	32.9	31.1
677	1724;6259;7075;11492;11780;18915;19008;19172	IPI00013698	NP_808592	ENSG00000104763	ASAH1	ASAH1{N-acylsphingosine amidohydrolase (acid ceramidase) 1 [Source:HGNC Symbol,Acc:735]}	8	2	6	7	2	2	10.1	10.1	2	60.682	546	20	20	4.8159e-22	7.1	9.7
680	4674;18752	IPI00013744	NP_002194	ENSG00000164171	ITGA2	ITGA2{integrin, alpha 2 (CD49B, alpha 2 subunit of VLA-2 receptor) [Source:HGNC Symbol,Acc:6137]}	2	2	2	2	2	2	1.1	1.1	1.1	129.29	1181	4	4	4.8123e-05	1.1	1.1
684	9517;12947	IPI00556579	NP_001504;NP_665877	ENSG00000100577	GSTZ1	GSTZ1{glutathione transferase zeta 1 [Source:HGNC Symbol,Acc:4643]}	2	2	2	1	2	1	15.7	15.7	15.7	24.114	216	5	1	1.0242e-32	15.7	6.5
694	5948;14116	IPI00013892	NP_004218;NP_059431;NP_004219;NP_004753;NP_059430	ENSG00000008256;ENSG00000105443;ENSG00000108669	CYTH3;CYTH2;CYTH1	CYTH3{cytohesin 3 [Source:HGNC Symbol,Acc:9504]};CYTH2{cytohesin 2 [Source:HGNC Symbol,Acc:9502]};CYTH1{cytohesin 1 [Source:HGNC Symbol,Acc:9501]}	2	2	1	2	1	2	4.5	4.5	4.5	46.348	400	3	8	0.0002242	1.8	4.5
698	12362;15845	IPI00013905	NP_005390	ENSG00000131791	PRKAB2	PRKAB2{protein kinase, AMP-activated, beta 2 non-catalytic subunit [Source:HGNC Symbol,Acc:9379]}	2	2	2	2	2	2	9.9	9.9	9.9	30.302	272	6	5	3.9599e-22	9.9	9.9
699	5133;16462	IPI00013912	NP_001129966;NP_001129967;NP_116189	ENSG00000119280	C1orf198	C1orf198{chromosome 1 open reading frame 198 [Source:HGNC Symbol,Acc:25900]}	2	2	1	2	1	2	6.4	6.4	6.4	36.346	327	5	7	2.9326e-35	3.7	6.4
701	15881;19709	IPI00013925	NP_000146	ENSG00000213930	GALT	GALT{galactose-1-phosphate uridylyltransferase [Source:HGNC Symbol,Acc:4135]}	2	2	2	2	2	2	7.4	7.4	7.4	43.363	379	4	3	1.7269e-14	7.4	7.4
713	6338;6339	IPI00014198	NP_055819	ENSG00000075914	EXOSC7	EXOSC7{exosome component 7 [Source:HGNC Symbol,Acc:28112]}	2	2	2	1	2	1	5.8	5.8	5.8	31.821	291	4	2	1.9893e-15	5.8	5.8
714	3276;19100	IPI00014213	NP_056155	ENSG00000011376	LARS2	LARS2{leucyl-tRNA synthetase 2, mitochondrial [Source:HGNC Symbol,Acc:17095]}	2	2	2	2	2	2	2.1	2.1	2.1	101.97	903	7	4	1.2038e-05	2.1	2.1
716	1440;19518	IPI00014232	NP_055976	ENSG00000170540	ARL6IP1	ARL6IP1{ADP-ribosylation factor-like 6 interacting protein 1 [Source:HGNC Symbol,Acc:697]}	2	2	1	2	1	2	5.9	5.9	5.9	23.362	203	4	17	1.0791e-07	3	5.9
725	4613;4734	IPI00014376	NP_006859	ENSG00000168461	RAB31	RAB31{RAB31, member RAS oncogene family [Source:HGNC Symbol,Acc:9771]}	2	2	2	2	2	2	10.8	10.8	10.8	21.7	195	18	16	8.373e-20	10.8	10.8
726	2784;19326	IPI00014400	NP_001002762;NP_060096	ENSG00000148719	DNAJB12	DNAJB12{DnaJ (Hsp40) homolog, subfamily B, member 12 [Source:HGNC Symbol,Acc:14891]}	2	2	1	2	1	2	4.9	4.9	4.9	45.489	409	1	3	4.4618e-14	2.4	4.9
729	6215;12878	IPI00014456	NP_003153	ENSG00000115808	STRN	STRN{striatin, calmodulin binding protein [Source:HGNC Symbol,Acc:11424]}	2	2	1	2	1	2	3.6	3.6	3.6	86.131	780	2	4	1.041e-23	2.7	3.6
736	8248;12906	IPI00655704	NP_002601	ENSG00000152256	PDK1	PDK1{pyruvate dehydrogenase kinase, isozyme 1 [Source:HGNC Symbol,Acc:8809]}	2	2	1	2	1	2	5.3	5.3	5.3	51.623	456	4	5	3.303e-15	2.4	5.3
737	14880;15220	IPI00643342	NP_003759	ENSG00000162734	PEA15	PEA15{phosphoprotein enriched in astrocytes 15 [Source:HGNC Symbol,Acc:8822]}	2	2	2	2	2	2	20.5	20.5	20.5	17.306	151	4	5	2.813e-98	20.5	20.5
742	5389;12425	IPI00031489	NP_005866;NP_005792	ENSG00000114784;ENSG00000173812	EIF1B;EIF1	EIF1B{eukaryotic translation initiation factor 1B [Source:HGNC Symbol,Acc:30792]};EIF1{eukaryotic translation initiation factor 1 [Source:HGNC Symbol,Acc:3249]}	2	2	1	2	1	2	27.4	27.4	27.4	12.823	113	2	3	1.3083e-10	14.2	27.4
744	9944;11112;12433;15102;18108;19257	IPI00015148	NP_001010942;NP_056461	ENSG00000127314	RAP1B	RAP1B{RAP1B, member of RAS oncogene family [Source:HGNC Symbol,Acc:9857]}	6	2	5	6	1	2	38	38	12	20.825	184	14	35	8.4171e-127	34.2	38
747	2524;5010	IPI00015388	NP_000428	ENSG00000158006	PAFAH2	PAFAH2{platelet-activating factor acetylhydrolase 2, 40kDa [Source:HGNC Symbol,Acc:8579]}	2	2	2	1	2	1	7.1	7.1	7.1	44.035	392	6	5	1.5228e-41	7.1	4.3
748	18460;19353	IPI00015473	NP_001160168;NP_004163;NP_001160167	ENSG00000079215	SLC1A3	SLC1A3{solute carrier family 1 (glial high affinity glutamate transporter), member 3 [Source:HGNC Symbol,Acc:10941]}	2	2	2	1	2	1	4.2	4.2	4.2	59.572	542	7	3	4.4838e-10	4.2	2
751	3198;7204	IPI00937956	NP_001157945;NP_001020119;NP_060207	ENSG00000137942	FNBP1L	FNBP1L{formin binding protein 1-like [Source:HGNC Symbol,Acc:20851]}	2	2	2	0	2	0	4.8	4.8	4.8	70.034	606	2		5.4242e-16	4.8	0
754	8173;12329	IPI00015736	NP_079094;NP_938143	ENSG00000081307	UBA5	UBA5{ubiquitin-like modifier activating enzyme 5 [Source:HGNC Symbol,Acc:23230]}	2	2	2	2	2	2	4.7	4.7	4.7	44.863	404	3	5	4.5455e-08	4.7	4.7
757	16059;16953	IPI00015826	NP_036221	ENSG00000135776	ABCB10	ABCB10{ATP-binding cassette, sub-family B (MDR/TAP), member 10 [Source:HGNC Symbol,Acc:41]}	2	2	2	2	2	2	2.4	2.4	2.4	79.147	738	8	8	3.8147e-20	2.4	2.4
758	12283;19300	IPI00926903	NP_060282	ENSG00000106554	CHCHD3	CHCHD3{coiled-coil-helix-coiled-coil-helix domain containing 3 [Source:HGNC Symbol,Acc:21906]}	2	2	2	2	2	2	8.6	8.6	8.6	26.694	232	3	3	2.5669e-12	8.6	8.6
762	3057;13515	IPI00980273	NP_002614	ENSG00000101132	PFDN4	PFDN4{prefoldin subunit 4 [Source:HGNC Symbol,Acc:8868]}	2	2	1	1	1	1	13.2	13.2	13.2	15.598	136	1	4	2.7901e-10	4.4	8.8
777	12525;18211	IPI00016249	NP_001013457;NP_005078;NP_001013456	ENSG00000114416	FXR1	FXR1{fragile X mental retardation, autosomal homolog 1 [Source:HGNC Symbol,Acc:4023]}	2	2	2	2	2	2	4.5	4.5	4.5	69.72	621	3	5	3.6233e-22	4.5	4.5
782	16778;18916	IPI00016346	NP_009129	ENSG00000147471	PROSC	PROSC{proline synthetase co-transcribed homolog (bacterial) [Source:HGNC Symbol,Acc:9457]}	2	2	2	2	2	2	8.1	8.1	8.1	34.042	310	8	8	1.1825e-21	8.1	8.1
784	1569;4483;9164;15281	IPI00016373	NP_002861	ENSG00000143545	RAB13	RAB13{RAB13, member RAS oncogene family [Source:HGNC Symbol,Acc:9762]}	4	2	4	4	2	2	17.2	8.4	8.4	22.774	203	3	3	9.6205e-17	17.2	17.2
789	1591;8948	IPI00029513	NP_079170	ENSG00000115761	NOL10	NOL10{nucleolar protein 10 [Source:HGNC Symbol,Acc:25862]}	2	2	1	2	1	2	2.8	2.8	2.8	80.301	688	2	6	3.7367e-05	1.6	2.8
791	16923;17232	IPI00016532	NP_060337	ENSG00000056050	C4orf27	C4orf27{chromosome 4 open reading frame 27 [Source:HGNC Symbol,Acc:26051]}	2	2	2	1	2	1	6.6	6.6	6.6	39.436	346	6	2	3.7888e-06	6.6	2.6
794	1153;1335	IPI00016605	NP_060357	ENSG00000162384	C1orf123	C1orf123{chromosome 1 open reading frame 123 [Source:HGNC Symbol,Acc:26059]}	2	2	2	2	2	2	20.6	20.6	20.6	18.048	160	5	3	3.6943e-31	20.6	20.6
807	14912;18850	IPI00016868	NP_057195	ENSG00000100726	TELO2	TELO2{TEL2, telomere maintenance 2, homolog (S. cerevisiae) [Source:HGNC Symbol,Acc:29099]}	2	2	2	2	2	2	1.8	1.8	1.8	91.746	837	3	6	1.9548e-07	1.8	1.8
810	10857;16364	IPI00016915	NP_001544	ENSG00000163453	IGFBP7	IGFBP7{insulin-like growth factor binding protein 7 [Source:HGNC Symbol,Acc:5476]}	2	2	1	2	1	2	10.3	10.3	10.3	29.13	282	1	4	5.255e-05	4.6	10.3
836	1890;4467;7989;9339;11684	IPI00017596	NP_036457	ENSG00000101367	MAPRE1	MAPRE1{microtubule-associated protein, RP/EB family, member 1 [Source:HGNC Symbol,Acc:6890]}	5	2	4	5	2	2	12.3	12.3	6.3	29.999	268	6	15	1.1288e-14	12.3	12.3
849	4714;17275	IPI00879750	NP_004166	ENSG00000256511;ENSG00000100028	KB-1995A5.13;SNRPD3	KB-1995A5.13{Small nuclear ribonucleoprotein Sm D3 [Source:UniProtKB/Swiss-Prot,Acc:P62318]};SNRPD3{small nuclear ribonucleoprotein D3 polypeptide 18kDa [Source:HGNC Symbol,Acc:11160]}	2	2	2	2	2	2	10.9	10.9	10.9	18.829	175	28	38	5.7764e-23	10.9	10.9
850	11760;13177	IPI00018026	NP_001137360;NP_060515;NP_001137361;NP_001137362	ENSG00000160058	BSDC1	BSDC1{BSD domain containing 1 [Source:HGNC Symbol,Acc:25501]}	2	2	2	2	2	2	6.1	6.1	6.1	51.166	474	2	3	8.0503e-19	6.1	6.1
852	8074;8626	IPI00018136	NP_001069;NP_001186763;NP_542413	ENSG00000162692	VCAM1	VCAM1{vascular cell adhesion molecule 1 [Source:HGNC Symbol,Acc:12663]}	2	2	2	2	2	2	2.6	2.6	2.6	81.275	739	2	3	6.6487e-05	2.6	2.6
862	484;1333;5395;6965	IPI00218448	NP_002097;NP_036544;NP_958924;NP_619541	ENSG00000164032;ENSG00000105968	H2AFZ;H2AFV	H2AFZ{H2A histone family, member Z [Source:HGNC Symbol,Acc:4741]};H2AFV{H2A histone family, member V [Source:HGNC Symbol,Acc:20664]}	4	2	4	4	2	2	31.2	18.8	18.8	13.553	128	11	23	1.0246e-42	31.2	31.2
863	6101;16397	IPI00018321	NP_001138887;NP_036564	ENSG00000143379	SETDB1	SETDB1{SET domain, bifurcated 1 [Source:HGNC Symbol,Acc:10761]}	2	2	2	2	2	2	1.8	1.8	1.8	143.16	1291	6	5	4.1099e-05	1.8	1.8
867	1286;19256	IPI00018364	NP_002877	ENSG00000181467	RAP2B	RAP2B{RAP2B, member of RAS oncogene family [Source:HGNC Symbol,Acc:9862]}	2	2	2	2	2	2	12	12	12	20.504	183	9	6	3.023e-21	12	12
871	2181;11306	IPI00018434	NP_006283	ENSG00000074319	TSG101	TSG101{tumor susceptibility gene 101 [Source:HGNC Symbol,Acc:15971]}	2	2	2	2	2	2	6.9	6.9	6.9	43.944	390	9	9	1.3444e-18	6.9	6.9
878	5184;10363	IPI00018744	NP_003780	ENSG00000102871	TRADD	TRADD{TNFRSF1A-associated via death domain [Source:HGNC Symbol,Acc:12030]}	2	2	2	2	2	2	6.7	6.7	6.7	34.247	312	3	4	0.00014312	6.7	6.7
887	4373;8291	IPI00018946	NP_060686	ENSG00000157881	PANK4	PANK4{pantothenate kinase 4 [Source:HGNC Symbol,Acc:19366]}	2	2	2	2	2	2	2.2	2.2	2.2	86.953	781	6	6	3.1327e-05	2.2	2.2
889	1684;2009;17898;18096	IPI00018963	NP_060692;NP_037459	ENSG00000197702;ENSG00000188677	PARVA;PARVB	PARVA{parvin, alpha [Source:HGNC Symbol,Acc:14652]};PARVB{parvin, beta [Source:HGNC Symbol,Acc:14653]}	4	2	3	3	1	1	11.9	11.9	6.8	46.589	412	10	11	1.3795e-28	8.5	8.5
891	7325;10339	IPI00018971	NP_003132	ENSG00000132109	TRIM21	TRIM21{tripartite motif containing 21 [Source:HGNC Symbol,Acc:11312]}	2	2	0	2	0	2	4	4	4	54.169	475		2	4.0487e-06	0	4
893	715;15739	IPI00019022	NP_009119	ENSG00000197150	ABCB8	ABCB8{ATP-binding cassette, sub-family B (MDR/TAP), member 8 [Source:HGNC Symbol,Acc:49]}	2	2	2	2	2	2	3	3	3	79.988	735	6	7	5.3721e-07	3	3
894	1559;18868	IPI00019038	NP_000230	ENSG00000090382	LYZ	LYZ{lysozyme [Source:HGNC Symbol,Acc:6740]}	2	2	2	2	2	2	9.5	9.5	9.5	16.537	148	6	9	0.00065202	9.5	9.5
895	9520;13372	IPI00019046	NP_060517	ENSG00000086589	RBM22	RBM22{RNA binding motif protein 22 [Source:HGNC Symbol,Acc:25503]}	2	2	2	1	2	1	4	4	4	46.895	420	4	2	6.9393e-05	4	2.4
900	5509;8572;17786	IPI00019242	NP_002419	ENSG00000102996	MMP15	MMP15{matrix metallopeptidase 15 (membrane-inserted) [Source:HGNC Symbol,Acc:7161]}	3	2	2	3	2	2	4.8	3.7	3.7	75.806	669	8	6	2.121e-29	3.7	4.8
905	5524;19931	IPI00019353	NP_060708	ENSG00000006530	AGK	AGK{acylglycerol kinase [Source:HGNC Symbol,Acc:21869]}	2	2	2	2	2	2	4.7	4.7	4.7	47.137	422	14	17	3.4711e-07	4.7	4.7
909	403;7157	IPI00019383	NP_000145	ENSG00000108479	GALK1	GALK1{galactokinase 1 [Source:HGNC Symbol,Acc:4118]}	2	2	2	2	2	2	7.1	7.1	7.1	45.357	422	2	3	5.0276e-24	7.1	7.1
915	15302;17487	IPI00019459	NP_006107	ENSG00000100324	TAB1	TAB1{TGF-beta activated kinase 1/MAP3K7 binding protein 1 [Source:HGNC Symbol,Acc:18157]}	2	2	2	1	2	1	5	5	5	54.643	504	3	1	1.5027e-05	5	2.4
917	4136;13431	IPI00019472	NP_001138616;NP_005619	ENSG00000105281	SLC1A5	SLC1A5{solute carrier family 1 (neutral amino acid transporter), member 5 [Source:HGNC Symbol,Acc:10943]}	2	2	2	2	2	2	4.4	4.4	4.4	56.598	541	9	13	1.4164e-11	4.4	4.4
921	14992;15194	IPI00019551	NP_003302	ENSG00000181649	PHLDA2	PHLDA2{pleckstrin homology-like domain, family A, member 2 [Source:HGNC Symbol,Acc:12385]}	2	2	2	2	2	2	6.6	6.6	6.6	17.092	152	9	3	7.9641e-14	6.6	6.6
924	2172;5443	IPI00019591	NP_001701	ENSG00000239754;ENSG00000241534;ENSG00000242335;ENSG00000243570;ENSG00000244255;ENSG00000241253;ENSG00000243649	XXbac-BPG116M5.17;CFB	XXbac-BPG116M5.17{cDNA FLJ55673, highly similar to Complement factor B [Source:UniProtKB/TrEMBL,Acc:B4E1Z4]};CFB{complement factor B [Source:HGNC Symbol,Acc:1037]}	2	2	0	2	0	2	1.4	1.4	1.4	140.94	1266		8	9.3452e-05	0	1.4
926	1358;4558;14429	IPI00019642	NP_003379;NP_115797	ENSG00000106665	CLIP2	CLIP2{CAP-GLY domain containing linker protein 2 [Source:HGNC Symbol,Acc:2586]}	3	2	3	3	2	2	2.9	1.8	1.8	115.84	1046	8	14	4.1203e-07	2.9	2.9
930	3801;11311	IPI00641743	NP_005325	ENSG00000172534	HCFC1	HCFC1{host cell factor C1 (VP16-accessory protein) [Source:HGNC Symbol,Acc:4839]}	2	2	2	1	2	1	0.9	0.9	0.9	213.47	2080	5	3	0.00031557	0.9	0.3
931	7341;19052	IPI00220158	NP_054908;NP_001110;NP_789771;NP_054909	ENSG00000087274	ADD1	ADD1{adducin 1 (alpha) [Source:HGNC Symbol,Acc:243]}	2	2	2	2	2	2	2.5	2.5	2.5	84.302	768	7	8	2.3561e-22	2.5	2.5
939	4329;13094	IPI00019988	NP_000190	ENSG00000181523	SGSH	SGSH{N-sulfoglucosamine sulfohydrolase [Source:HGNC Symbol,Acc:10818]}	2	2	1	1	1	1	5.6	5.6	5.6	56.695	502	1	1	5.6401e-08	1.8	3.8
940	15087;18275	IPI00019989	NP_001660	ENSG00000006756	ARSD	ARSD{arylsulfatase D [Source:HGNC Symbol,Acc:717]}	2	2	2	2	2	2	5.6	5.6	5.6	64.859	593	14	5	3.5269e-80	5.6	5.6
942	1371;8049	IPI00019997	NP_060832	ENSG00000148943	LIN7C	LIN7C{lin-7 homolog C (C. elegans) [Source:HGNC Symbol,Acc:17789]}	2	2	1	2	1	2	15.2	15.2	15.2	21.834	197	2	5	3.9933e-05	8.1	15.2
956	5373;18270	IPI00020196	NP_001186125;NP_219483	ENSG00000105676	ARMC6	ARMC6{armadillo repeat containing 6 [Source:HGNC Symbol,Acc:25049]}	2	2	2	2	2	2	4.4	4.4	4.4	54.141	501	4	2	0.00025373	4.4	4.4
958	6119;18396	IPI00020258	NP_009112;NP_001036065	ENSG00000104814	MAP4K1	MAP4K1{mitogen-activated protein kinase kinase kinase kinase 1 [Source:HGNC Symbol,Acc:6863]}	2	2	1	1	1	1	2.5	2.5	2.5	91.295	833	1	2	0.00071313	1.4	1.1
964	674;874;1633;2096;4401;5136;7968;10145;10937;11592;11676;12075;13727;13776;13826;14276;14446;14985;16020;16904;17062;18138	IPI00873982	NP_001035203;NP_002465;NP_001035202;NP_074035	ENSG00000133392	MYH11	MYH11{myosin, heavy chain 11, smooth muscle [Source:HGNC Symbol,Acc:7569]}	22	2	19	22	1	2	8.7	0.8	0.8	234.23	2029	2	7	0	7.6	8.7
966	9089;16679	IPI00410631	NP_996892	ENSG00000119979	FAM45A	FAM45A{family with sequence similarity 45, member A [Source:HGNC Symbol,Acc:31793]}	2	2	2	2	2	2	5.6	5.6	5.6	40.513	357	10	5	1.9358e-06	5.6	5.6
975	7101;12889	IPI00020898	NP_004577	ENSG00000177189	RPS6KA3	RPS6KA3{ribosomal protein S6 kinase, 90kDa, polypeptide 3 [Source:HGNC Symbol,Acc:10432]}	2	2	2	2	2	2	3.5	3.5	3.5	83.735	740	6	6	0.00081567	3.5	3.5
978	16463;19399	IPI00900291	NP_066283;NP_808821;NP_808820	ENSG00000100614	PPM1A	PPM1A{protein phosphatase, Mg2+/Mn2+ dependent, 1A [Source:HGNC Symbol,Acc:9275]}	2	2	1	2	1	2	4.6	4.6	4.6	51.366	455	2	5	0.00018157	2.2	4.6
982	8020;13496	IPI00020987	NP_002716;NP_958505	ENSG00000188783	PRELP	PRELP{proline/arginine-rich end leucine-rich repeat protein [Source:HGNC Symbol,Acc:9357]}	2	2	2	2	2	2	6.8	6.8	6.8	43.809	382	7	4	6.7936e-09	6.8	6.8
984	5447;19726	IPI00921882	NP_001035147;NP_000573	ENSG00000118785	SPP1	SPP1{secreted phosphoprotein 1 [Source:HGNC Symbol,Acc:11255]}	2	2	0	2	0	2	7.6	7.6	7.6	37.245	327		5	3.0504e-09	0	7.6
998	5631;6856	IPI00021320	NP_001181919;NP_001181920;NP_001181921;NP_062552	ENSG00000146834	MEPCE	MEPCE{methylphosphate capping enzyme [Source:HGNC Symbol,Acc:20247]}	2	2	2	1	2	1	3.5	3.5	3.5	74.354	689	10	3	1.0163e-07	3.5	1.6
1004	11138;17378	IPI00021370	NP_005330	ENSG00000078140	UBE2K	UBE2K{ubiquitin-conjugating enzyme E2K (UBC1 homolog, yeast) [Source:HGNC Symbol,Acc:4914]}	2	2	2	2	2	2	15	15	15	22.406	200	3	3	1.3354e-21	15	15
1006	3967;18939	IPI01013132	NP_001191032;NP_005146;NP_619731	ENSG00000168452;ENSG00000206329;ENSG00000227600;ENSG00000231618;ENSG00000236649;ENSG00000221988;ENSG00000206256;ENSG00000254875;ENSG00000254778;ENSG00000228116	PPT2;DAQB-143M3.10;XXbac-BCX105D18.9	PPT2{palmitoyl-protein thioesterase 2 [Source:HGNC Symbol,Acc:9326]};DAQB-143M3.10{epidermal growth factor-like protein 8 precursor [Source:RefSeq peptide,Acc:NP_085155]};XXbac-BCX105D18.9{cDNA FLJ52513, highly similar to Lysosomal thioesterase PPT2 [Source:UniProtKB/TrEMBL,Acc:B7Z424]}	2	2	2	2	2	2	7.1	7.1	7.1	34.902	308	6	6	3.2926e-09	7.1	7.1
1009	2223;2336;7790;8144;9162;9315;9832;12048;17693;18744;18754;19536	IPI00021458	NP_055415	ENSG00000013016	EHD3	EHD3{EH-domain containing 3 [Source:HGNC Symbol,Acc:3244]}	12	2	10	12	2	2	23.3	7.3	5.3	61.895	546	10	9	2.2739e-69	22	23.3
1011	12063;15335	IPI00021594	NP_003792	ENSG00000197858;ENSG00000256430	AC109322.6;GPAA1	AC109322.6{glycosylphosphatidylinositol anchor attachment 1 protein [Source:RefSeq peptide,Acc:NP_003792]};GPAA1{glycosylphosphatidylinositol anchor attachment protein 1 homolog (yeast) [Source:HGNC Symbol,Acc:4446]}	2	2	2	2	2	2	3.5	3.5	3.5	67.622	621	4	2	1.2399e-05	3.5	3.5
1020	15418;16779	IPI00021793	NP_004364	ENSG00000111775;ENSG00000226976	COX6A1;COX6A1P2	COX6A1{cytochrome c oxidase subunit VIa polypeptide 1 [Source:HGNC Symbol,Acc:2277]};COX6A1P2{cytochrome c oxidase subunit VIa polypeptide 1 pseudogene 2 [Source:HGNC Symbol,Acc:35239]}	2	2	2	2	2	2	43.1	43.1	43.1	12.155	109	8	5	3.4059e-35	43.1	43.1
1029	7653;9766	IPI00021834	NP_006278	ENSG00000003436	TFPI	TFPI{tissue factor pathway inhibitor (lipoprotein-associated coagulation inhibitor) [Source:HGNC Symbol,Acc:11760]}	2	2	2	2	2	2	5.9	5.9	5.9	35.015	304	9	8	1.8022e-11	5.9	5.9
1042	7158;17128	IPI00021997	NP_003842	ENSG00000143162	CREG1	CREG1{cellular repressor of E1A-stimulated genes 1 [Source:HGNC Symbol,Acc:2351]}	2	2	2	2	2	2	8.2	8.2	8.2	24.074	220	5	4	5.7356e-08	8.2	8.2
1048	3133;7300;15474;18122;18210	IPI00549434	NP_001092281;NP_001092283;NP_055961;NP_001092282	ENSG00000164402	8-Sep	SEPT8{septin 8 [Source:HGNC Symbol,Acc:16511]}	5	2	3	4	0	2	8.3	3.5	3.5	55.756	483		6	1.3001e-10	4.8	7
1052	1378;12554	IPI00022145	NP_073568	ENSG00000069275	NUCKS1	NUCKS1{nuclear casein kinase and cyclin-dependent kinase substrate 1 [Source:HGNC Symbol,Acc:29923]}	2	2	2	2	2	2	11.9	11.9	11.9	27.296	243	2	3	2.7796e-33	11.9	11.9
1060	2145;2468	IPI00022265	NP_054727	ENSG00000101997	CCDC22	CCDC22{coiled-coil domain containing 22 [Source:HGNC Symbol,Acc:28909]}	2	2	2	1	2	1	3.5	3.5	3.5	70.755	627	5	3	5.4423e-05	3.5	1.4
1062	3427;10234	IPI00022300	NP_054752	ENSG00000185432	METTL7A	METTL7A{methyltransferase like 7A [Source:HGNC Symbol,Acc:24550]}	2	2	2	2	2	2	11.9	11.9	11.9	28.319	244	5	12	2.1702e-74	11.9	11.9
1063	8206;10493	IPI00798193	NP_054754	ENSG00000064652	SNX24	SNX24{sorting nexin 24 [Source:HGNC Symbol,Acc:21533]}	2	2	2	1	2	1	9.9	9.9	9.9	23.728	202	13	11	1.8574e-24	9.9	5.4
1076	6730;18601	IPI00908768	NP_653218	ENSG00000004776	HSPB6	HSPB6{heat shock protein, alpha-crystallin-related, B6 [Source:HGNC Symbol,Acc:26511]}	2	2	2	2	2	2	12.2	12.2	12.2	21.232	197	6	6	6.7921e-14	12.2	12.2
1082	7939;13148	IPI00022471	NP_036424	ENSG00000180448	HMHA1	HMHA1{histocompatibility (minor) HA-1 [Source:HGNC Symbol,Acc:17102]}	2	2	1	2	1	2	2.1	2.1	2.1	126.56	1152	4	4	1.8672e-50	1.6	2.1
1091	8741;10146	IPI00216247	NP_002801	ENSG00000159352	PSMD4	PSMD4{proteasome (prosome, macropain) 26S subunit, non-ATPase, 4 [Source:HGNC Symbol,Acc:9561]}	2	2	1	2	1	2	8.7	8.7	8.7	41.079	380	2	9	1.687e-48	3.9	8.7
1094	174;19108	IPI00793751	NP_001185624;NP_002395	ENSG00000166482	MFAP4	MFAP4{microfibrillar-associated protein 4 [Source:HGNC Symbol,Acc:7035]}	2	2	2	2	2	2	8.1	8.1	8.1	33.113	297	3	6	3.5441e-76	8.1	8.1
1096	9086;13777	IPI00022810	NP_001805	ENSG00000109861	CTSC	CTSC{cathepsin C [Source:HGNC Symbol,Acc:2528]}	2	2	2	2	2	2	5	5	5	51.853	463	23	25	1.0686e-08	5	5
1099	138;3859;5286;5369;6121;6128;6161;7337;9200;11730;13005;14242;16268;19345	IPI00022891	NP_001142	ENSG00000151729	SLC25A4	SLC25A4{solute carrier family 25 (mitochondrial carrier, adenine nucleotide translocator), member 4 [Source:HGNC Symbol,Acc:10990]}	14	2	11	14	1	2	42.3	6	6	33.064	298	17	17	1.1869e-135	35.6	42.3
1102	1230;14181	IPI00022937	NP_000121	ENSG00000198734	F5	F5{coagulation factor V (proaccelerin, labile factor) [Source:HGNC Symbol,Acc:3542]}	2	2	2	2	2	2	1.2	1.2	1.2	252.2	2229	5	6	2.8426e-13	1.2	1.2
1103	2965;9225	IPI00023001	NP_055182	ENSG00000114023	FAM162A	FAM162A{family with sequence similarity 162, member A [Source:HGNC Symbol,Acc:17865]}	2	2	1	2	1	2	15.6	15.6	15.6	17.342	154	3	6	0.00022824	4.5	15.6
1110	8831;19260	IPI00984259	NP_473363;NP_004278	ENSG00000108433	GOSR2	GOSR2{golgi SNAP receptor complex member 2 [Source:HGNC Symbol,Acc:4431]}	2	2	2	2	2	2	11.6	11.6	11.6	26.624	232	8	8	1.6698e-18	11.6	11.6
1118	7776;14955	IPI00023334	NP_057040;NP_666499;NP_666500	ENSG00000105364	MRPL4	MRPL4{mitochondrial ribosomal protein L4 [Source:HGNC Symbol,Acc:14276]}	2	2	1	2	1	2	7.4	7.4	7.4	34.919	311	8	14	1.9753e-13	3.9	7.4
1119	8639;18695	IPI00023344	NP_004810	ENSG00000125755	SYMPK	SYMPK{symplekin [Source:HGNC Symbol,Acc:22935]}	2	2	2	2	2	2	1.2	1.2	1.2	141.15	1274	6	8	0.0001598	1.2	1.2
1120	8663;16155	IPI00023406	NP_001116080;NP_001165462;NP_005324	ENSG00000004961	HCCS	HCCS{holocytochrome c synthase [Source:HGNC Symbol,Acc:4837]}	2	2	2	2	2	2	8.2	8.2	8.2	30.601	268	6	5	4.5626e-09	8.2	8.2
1134	12972;19941	IPI00023704	NP_001161143;NP_001161144;NP_005569	ENSG00000145012	LPP	LPP{LIM domain containing preferred translocation partner in lipoma [Source:HGNC Symbol,Acc:6679]}	2	2	2	2	2	2	5.1	5.1	5.1	65.746	612	4	3	6.6214e-20	5.1	5.1
1137	2065;15810	IPI00797126	NP_001106672;NP_001106673;NP_005585	ENSG00000196531	NACA	NACA{nascent polypeptide-associated complex alpha subunit [Source:HGNC Symbol,Acc:7629]}	2	2	2	2	2	2	1.3	1.3	1.3	205.42	2078	5	17	2.0104e-41	1.3	1.3
1138	1296;6961	IPI00456664	NP_001172023;NP_005591;NP_001172022	ENSG00000158793	NIT1	NIT1{nitrilase 1 [Source:HGNC Symbol,Acc:7828]}	2	2	2	2	2	2	7.1	7.1	7.1	40.2	367	3	5	8.9242e-11	7.1	7.1
1139	9307;13414	IPI00023832	NP_001017995	ENSG00000174705	SH3PXD2B	SH3PXD2B{SH3 and PX domains 2B [Source:HGNC Symbol,Acc:29242]}	2	2	2	2	2	2	1.6	1.6	1.6	101.58	911	4	9	8.1316e-05	1.6	1.6
1143	5207;5964	IPI00024006	NP_055417	ENSG00000196455	PIK3R4	PIK3R4{phosphoinositide-3-kinase, regulatory subunit 4 [Source:HGNC Symbol,Acc:8982]}	2	2	2	2	2	2	1.5	1.5	1.5	153.1	1358	2	2	2.3883e-05	1.5	1.5
1145	6962;18983	IPI00024083	NP_001035861;NP_055250	ENSG00000138744	NAAA	NAAA{N-acylethanolamine acid amidase [Source:HGNC Symbol,Acc:736]}	2	2	1	2	1	2	4.2	4.2	4.2	40.066	359	7	7	8.4998e-07	2.5	4.2
1158	5580;19940	IPI00024320	NP_006734	ENSG00000102317	RBM3	RBM3{RNA binding motif (RNP1, RRM) protein 3 [Source:HGNC Symbol,Acc:9900]}	2	2	2	2	2	2	21	21	21	17.17	157	12	8	5.9105e-85	21	21
1161	4829;6918	IPI00071189	NP_277022;NP_277023;NP_277028;NP_277071;NP_076916;NP_277021;NP_277027;NP_277024	ENSG00000008128	CDK11A	CDK11A{cyclin-dependent kinase 11A [Source:HGNC Symbol,Acc:1730]}	2	2	2	2	2	2	2.3	2.3	2.3	91.866	797	11	4	2.3772e-18	2.3	2.3
1162	7315;19538	IPI00024425	NP_056044	ENSG00000132361	KIAA0664	KIAA0664{KIAA0664 [Source:HGNC Symbol,Acc:29094]}	2	2	2	2	2	2	1.1	1.1	1.1	146.82	1310	22	21	5.2535e-05	1.1	1.1
1170	73;12930	IPI00024621	NP_064575	ENSG00000116774	OLFML3	OLFML3{olfactomedin-like 3 [Source:HGNC Symbol,Acc:24956]}	2	2	0	2	0	2	4.4	4.4	4.4	46.01	406		5	2.5444e-05	0	4.4
1175	10319;19535	IPI00386516	NP_055576	ENSG00000182149	KIAA0174	KIAA0174{KIAA0174 [Source:HGNC Symbol,Acc:28977]}	2	2	1	2	1	2	4.2	4.2	4.2	41.565	379	1	5	9.9309e-07	2.4	4.2
1180	3272;8818;13485	IPI00024673	NP_002743;NP_620709;NP_620707;NP_620708	ENSG00000050748	MAPK9	MAPK9{mitogen-activated protein kinase 9 [Source:HGNC Symbol,Acc:6886]}	3	2	3	3	2	2	6.8	5	5	48.139	424	8	6	2.6939e-11	6.8	6.8
1195	1136;7902	IPI00024920	NP_001001975;NP_001678	ENSG00000099624	ATP5D	ATP5D{ATP synthase, H+ transporting, mitochondrial F1 complex, delta subunit [Source:HGNC Symbol,Acc:837]}	2	2	2	2	2	2	13.7	13.7	13.7	17.49	168	7	10	4.0358e-31	13.7	13.7
1213	12342;17022	IPI00025202	NP_005883	ENSG00000184922	FMNL1	FMNL1{formin-like 1 [Source:HGNC Symbol,Acc:1212]}	2	2	2	0	2	0	2.1	2.1	2.1	122.41	1104	5		0.00071223	2.1	0
1223	9396;12249	IPI00387130	NP_064709	ENSG00000005194	CIAPIN1	CIAPIN1{cytokine induced apoptosis inhibitor 1 [Source:HGNC Symbol,Acc:28050]}	2	2	2	2	2	2	6.7	6.7	6.7	33.582	312	4	4	8.5589e-05	6.7	6.7
1225	10191;19547	IPI00025346	NP_004556	ENSG00000142655	PEX14	PEX14{peroxisomal biogenesis factor 14 [Source:HGNC Symbol,Acc:8856]}	2	2	2	2	2	2	5.8	5.8	5.8	41.236	377	5	5	4.9828e-05	5.8	5.8
1233	7798;12109;19109	IPI00550627	NP_001139688;NP_006274;NP_001116296	ENSG00000147526	TACC1	TACC1{transforming, acidic coiled-coil containing protein 1 [Source:HGNC Symbol,Acc:11522]}	3	2	2	3	1	2	3.3	2.3	2.3	89.217	817	4	5	5.5848e-05	1.8	3.3
1234	734;14802	IPI00025717	NP_006545	ENSG00000128654	MTX2	MTX2{metaxin 2 [Source:HGNC Symbol,Acc:7506]}	2	2	1	2	1	2	6.1	6.1	6.1	29.763	263	2	5	1.4794e-05	3.8	6.1
1237	3114;6910	IPI00025767	NP_000592;NP_001010932	ENSG00000019991	HGF	HGF{hepatocyte growth factor (hepapoietin A, scatter factor) [Source:HGNC Symbol,Acc:4893]}	2	2	2	2	2	2	3.6	3.6	3.6	83.133	728	2	2	0.00055723	3.6	3.6
1245	8410;16879	IPI00025869	NP_000160	ENSG00000102393	GLA	GLA{galactosidase, alpha [Source:HGNC Symbol,Acc:4296]}	2	2	2	2	2	2	4.7	4.7	4.7	48.766	429	8	8	2.3559e-06	4.7	4.7
1249	1884;11501	IPI00026087	NP_001137457;NP_003851	ENSG00000175334	BANF1	BANF1{barrier to autointegration factor 1 [Source:HGNC Symbol,Acc:17397]}	2	2	2	2	2	2	34.8	34.8	34.8	10.058	89	2	5	0.00046571	34.8	34.8
1267	5403;14316	IPI00026320	NP_056986	ENSG00000104517	UBR5	UBR5{ubiquitin protein ligase E3 component n-recognin 5 [Source:HGNC Symbol,Acc:16806]}	2	2	2	1	2	1	0.8	0.8	0.8	309.35	2799	3	4	7.5046e-09	0.8	0.4
1270	8904;9023;9144;9791	IPI00026359	NP_001073138;NP_112187	ENSG00000102547	CAB39L	CAB39L{calcium binding protein 39-like [Source:HGNC Symbol,Acc:20290]}	4	2	4	3	2	1	10.4	5.6	5.6	39.087	337	8	3	1.2276e-10	10.4	7.4
1272	5983;13437	IPI00026513	NP_653164	ENSG00000153574	RPIA	RPIA{ribose 5-phosphate isomerase A [Source:HGNC Symbol,Acc:10297]}	2	2	2	2	2	2	7.7	7.7	7.7	33.269	311	5	12	1.7548e-11	7.7	7.7
1275	3428;9518	IPI00026546	NP_001171677;NP_002563	ENSG00000168092	PAFAH1B2	PAFAH1B2{platelet-activating factor acetylhydrolase 1b, catalytic subunit 2 (30kDa) [Source:HGNC Symbol,Acc:8575]}	2	2	2	2	2	2	12.2	12.2	12.2	25.569	229	11	13	7.9029e-32	12.2	12.2
1281	1076;16971	IPI00419894	NP_001189472;NP_853530	ENSG00000160967	CUX1	CUX1{cut-like homeobox 1 [Source:HGNC Symbol,Acc:2557]}	2	2	1	2	1	2	1.6	1.6	1.6	165.69	1516	4	8	5.7802e-13	0.8	1.6
1282	358;2180;7362	IPI00026689	NP_001777	ENSG00000170312	CDK1	CDK1{cyclin-dependent kinase 1 [Source:HGNC Symbol,Acc:1722]}	3	2	1	3	0	2	8.9	6.3	6.3	34.778	303		6	9.5812e-07	2.6	8.9
1296	627;16868	IPI00026994	NP_009144	ENSG00000243279	PRAF2	PRAF2{PRA1 domain family, member 2 [Source:HGNC Symbol,Acc:28911]}	2	2	1	1	1	1	16.3	16.3	16.3	19.258	178	5	4	1.0727e-17	10.1	6.2
1301	4813;14763	IPI00027096	NP_055578	ENSG00000115364	MRPL19	MRPL19{mitochondrial ribosomal protein L19 [Source:HGNC Symbol,Acc:14052]}	2	2	2	2	2	2	6.5	6.5	6.5	33.535	292	4	4	8.7705e-05	6.5	6.5
1305	794;12561	IPI00027178	NP_003908	ENSG00000213983	AP1G2	AP1G2{adaptor-related protein complex 1, gamma 2 subunit [Source:HGNC Symbol,Acc:556]}	2	2	1	2	1	2	2.7	2.7	2.7	87.116	785	3	6	1.2229e-11	1.3	2.7
1307	8426;8651	IPI00027181	NP_001020127;NP_008849	ENSG00000109929	SC5DL	SC5DL{sterol-C5-desaturase (ERG3 delta-5-desaturase homolog, S. cerevisiae)-like [Source:HGNC Symbol,Acc:10547]}	2	2	1	1	1	1	5	5	5	35.3	299	4	2	5.7166e-06	3	2
1312	6914;11758	IPI00027233	NP_004580	ENSG00000133028	SCO1	SCO1{SCO cytochrome oxidase deficient homolog 1 (yeast) [Source:HGNC Symbol,Acc:10603]}	2	2	1	2	1	2	11	11	11	33.814	301	4	6	8.7186e-05	4.3	11
1316	4922;6789;11495;12642;19654;19895	IPI00027270	NP_000978	ENSG00000161970	RPL26	RPL26{ribosomal protein L26 [Source:HGNC Symbol,Acc:10327]}	6	2	5	6	2	2	29.7	29.7	11.7	17.258	145	13	25	2.1731e-12	23.4	29.7
1320	7218;8744;9732;18306	IPI00027342	NP_006357	ENSG00000112186	CAP2	CAP2{CAP, adenylate cyclase-associated protein, 2 (yeast) [Source:HGNC Symbol,Acc:20039]}	4	2	4	3	2	1	9.6	6.7	6.7	52.823	477	4	2	2.5543e-08	9.6	7.3
1323	1012;7443	IPI00909195	NP_653171	ENSG00000206053	HN1L	HN1L{hematological and neurological expressed 1-like [Source:HGNC Symbol,Acc:14137]}	2	2	2	2	2	2	16.1	16.1	16.1	23.025	218	4	4	1.7695e-23	16.1	16.1
1324	8249;11026	IPI00027409	NP_002768	ENSG00000196415	PRTN3	PRTN3{proteinase 3 [Source:HGNC Symbol,Acc:9495]}	2	2	2	2	2	2	7.8	7.8	7.8	27.807	256	10	7	4.7936e-06	7.8	7.8
1325	8415;19493	IPI00027415	NP_065916;NP_001107869	ENSG00000174953	DHX36	DHX36{DEAH (Asp-Glu-Ala-His) box polypeptide 36 [Source:HGNC Symbol,Acc:14410]}	2	2	2	2	2	2	1.8	1.8	1.8	114.76	1008	9	7	4.1911e-08	1.8	1.8
1327	3221;13264	IPI00880170	NP_001161792;NP_006666	ENSG00000011105	TSPAN9	TSPAN9{tetraspanin 9 [Source:HGNC Symbol,Acc:21640]}	2	2	2	2	2	2	9.6	9.6	9.6	29.559	271	2	2	2.6305e-10	9.6	9.6
1328	2109;15891	IPI00027438	NP_005794	ENSG00000137312;ENSG00000206379;ENSG00000206480;ENSG00000230143;ENSG00000232280	FLOT1	FLOT1{flotillin 1 [Source:HGNC Symbol,Acc:3757]}	2	2	1	2	1	2	6.8	6.8	6.8	47.355	427	2	4	1.2769e-13	3.3	6.8
1337	10981;18797;18968	IPI00965726	NP_001124151;NP_001124150;NP_001959	ENSG00000151247	EIF4E	EIF4E{eukaryotic translation initiation factor 4E [Source:HGNC Symbol,Acc:3287]}	3	2	2	2	1	2	11.3	11.3	8.5	28.777	248	16	25	4.7226e-11	5.6	8.5
1344	8125;19251	IPI00220303	NP_006113	ENSG00000196547	MAN2A2	MAN2A2{mannosidase, alpha, class 2A, member 2 [Source:HGNC Symbol,Acc:6825]}	2	2	2	2	2	2	2.1	2.1	2.1	130.54	1150	3	4	3.1322e-10	2.1	2.1
1347	5554;15561	IPI00027745	NP_000172	ENSG00000169919	GUSB	GUSB{glucuronidase, beta [Source:HGNC Symbol,Acc:4696]}	2	2	1	2	1	2	3.4	3.4	3.4	74.731	651	3	3	8.4026e-05	1.4	3.4
1348	19889;19954	IPI00554589	NP_001012533;NP_000131	ENSG00000066926	FECH	FECH{ferrochelatase [Source:HGNC Symbol,Acc:3647]}	2	2	2	2	2	2	4.9	4.9	4.9	48.624	429	3	7	9.8029e-10	4.9	4.9
1359	4575;9897	IPI00028004	NP_002786	ENSG00000108294	PSMB3	PSMB3{proteasome (prosome, macropain) subunit, beta type, 3 [Source:HGNC Symbol,Acc:9540]}	2	2	2	2	2	2	11.2	11.2	11.2	22.949	205	5	16	5.6232e-37	11.2	11.2
1360	17805;19509	IPI00028005	NP_065134	ENSG00000111581	NUP107	NUP107{nucleoporin 107kDa [Source:HGNC Symbol,Acc:29914]}	2	2	2	2	2	2	2.3	2.3	2.3	106.37	925	7	6	2.5528e-06	2.3	2.3
1367	5751;11189	IPI00028065	NP_006144	ENSG00000158092	NCK1	NCK1{NCK adaptor protein 1 [Source:HGNC Symbol,Acc:7664]}	2	2	2	1	2	1	4.5	4.5	4.5	42.864	377	2	1	3.3117e-05	4.5	2.1
1369	4594;7236	IPI00028095	NP_001159715;NP_002003	ENSG00000189283	FHIT	FHIT{fragile histidine triad gene [Source:HGNC Symbol,Acc:3701]}	2	2	2	1	2	1	18.4	18.4	18.4	16.858	147	6	1	0.00036912	18.4	12.2
1370	1853;6660;17343	IPI00028122	NP_001121689;NP_150091;NP_066967	ENSG00000164985	PSIP1	PSIP1{PC4 and SFRS1 interacting protein 1 [Source:HGNC Symbol,Acc:9527]}	3	2	2	3	1	2	6.4	4.9	4.9	60.103	530	4	5	1.7699e-09	3.6	6.4
1371	3793;11711	IPI00028160	NP_000181;NP_001019553	ENSG00000256269;ENSG00000149397	HMBS	HMBS{hydroxymethylbilane synthase [Source:HGNC Symbol,Acc:4982]}	2	2	2	2	2	2	5.5	5.5	5.5	39.33	361	3	3	0.0003651	5.5	5.5
1372	1496;4219	IPI00028264	NP_787072	ENSG00000116903	EXOC8	EXOC8{exocyst complex component 8 [Source:HGNC Symbol,Acc:24659]}	2	2	1	2	1	2	2.5	2.5	2.5	81.798	725	2	4	7.7688e-05	1.5	2.5
1376	2282;9401;14165	IPI00028357	NP_071904	ENSG00000132953	XPO4	XPO4{exportin 4 [Source:HGNC Symbol,Acc:17796]}	3	2	3	3	2	2	2.2	2.2	1.6	130.14	1151	11	13	5.3735e-06	2.2	2.2
1387	8352;11174	IPI00409566	NP_001009944;NP_000287	ENSG00000008710	PKD1	PKD1{polycystic kidney disease 1 (autosomal dominant) [Source:HGNC Symbol,Acc:9008]}	2	2	2	2	2	2	0.3	0.3	0.3	462.52	4303	2	7	0.00058846	0.3	0.3
1394	14921;19689	IPI00028957	NP_004779;NP_001191006	ENSG00000110344	UBE4A	UBE4A{ubiquitination factor E4A (UFD2 homolog, yeast) [Source:HGNC Symbol,Acc:12499]}	2	2	2	1	2	1	1.6	1.6	1.6	123.52	1073	4	5	0.00017063	1.6	0.7
1396	9810;11627	IPI00029015	NP_002026	ENSG00000119537	KDSR	KDSR{3-ketodihydrosphingosine reductase [Source:HGNC Symbol,Acc:4021]}	2	2	2	2	2	2	7.5	7.5	7.5	36.187	332	3	15	5.0905e-33	7.5	7.5
1397	4950;7761	IPI00514856	NP_055662;NP_001120792	ENSG00000143569	UBAP2L	UBAP2L{ubiquitin associated protein 2-like [Source:HGNC Symbol,Acc:29877]}	2	2	2	1	2	1	2.7	2.7	2.7	114.53	1087	7	2	1.5728e-24	2.7	0.8
1401	3952;18173	IPI00029056	NP_001182531;NP_036379;NP_001182533	ENSG00000086475	SEPHS1	SEPHS1{selenophosphate synthetase 1 [Source:HGNC Symbol,Acc:19685]}	2	2	1	2	1	2	5.6	5.6	5.6	42.91	392	9	22	4.2075e-39	2.6	5.6
1403	7238;17893	IPI00029081	NP_039269	ENSG00000005156	LIG3	LIG3{ligase III, DNA, ATP-dependent [Source:HGNC Symbol,Acc:6600]}	2	2	1	1	1	1	2.5	2.5	2.5	112.91	1009	7	1	6.5959e-06	1	1.5
1406	4600;13388	IPI00791262	NP_001536	ENSG00000167862	ICT1	ICT1{immature colon carcinoma transcript 1 [Source:HGNC Symbol,Acc:5359]}	2	2	2	1	2	1	10.3	10.3	10.3	24.469	213	3	1	0.00022673	10.3	6.6
1412	5429;18184	IPI00029266	NP_003085	ENSG00000182004;ENSG00000227624	SNRPE;SNRPEL1	SNRPE{small nuclear ribonucleoprotein polypeptide E [Source:HGNC Symbol,Acc:11161]};SNRPEL1{small nuclear ribonucleoprotein polypeptide E-like 1 [Source:HGNC Symbol,Acc:20733]}	2	2	2	2	2	2	25	25	25	10.803	92	36	44	3.7414e-20	25	25
1415	985;7744	IPI00029444	NP_067653	ENSG00000139637	C12orf10	C12orf10{chromosome 12 open reading frame 10 [Source:HGNC Symbol,Acc:17590]}	2	2	1	2	1	2	6.4	6.4	6.4	42.449	376	5	7	1.4455e-21	3.2	6.4
1420	2125;4399	IPI00029557	NP_079472	ENSG00000109519	GRPEL1	GRPEL1{GrpE-like 1, mitochondrial (E. coli) [Source:HGNC Symbol,Acc:19696]}	2	2	2	2	2	2	12.9	12.9	12.9	24.279	217	5	11	3.6594e-31	12.9	12.9
1423	1034;19390	IPI00029601	NP_005222;NP_612632	ENSG00000085733	CTTN	CTTN{cortactin [Source:HGNC Symbol,Acc:3338]}	2	2	1	2	1	2	3.6	3.6	3.6	61.585	550	10	10	8.5028e-35	2.2	3.6
1424	10033;18921	IPI00029605	NP_000503	ENSG00000141012	GALNS	GALNS{galactosamine (N-acetyl)-6-sulfate sulfatase [Source:HGNC Symbol,Acc:4122]}	2	2	2	1	2	1	4.2	4.2	4.2	58.025	522	14	8	6.6654e-20	4.2	1.7
1428	11370;13218	IPI00029631	NP_004441	ENSG00000100632	ERH	ERH{enhancer of rudimentary homolog (Drosophila) [Source:HGNC Symbol,Acc:3447]}	2	2	2	2	2	2	12.5	12.5	12.5	12.259	104	11	9	0.00024653	12.5	12.5
1432	9553;10386	IPI00029693	NP_957718;NP_003863;NP_958436;NP_061004;NP_957719	ENSG00000118257	NRP2	NRP2{neuropilin 2 [Source:HGNC Symbol,Acc:8005]}	2	2	2	2	2	2	2	2	2	104.86	931	6	6	0.00030024	2	2
1434	8549;17252	IPI00029730	NP_004595	ENSG00000103496	STX4	STX4{syntaxin 4 [Source:HGNC Symbol,Acc:11439]}	2	2	2	2	2	2	7.4	7.4	7.4	34.18	297	3	3	7.0571e-05	7.4	7.4
1437	7870;11769	IPI00029739	NP_000177	ENSG00000000971	CFH	CFH{complement factor H [Source:HGNC Symbol,Acc:4883]}	2	2	2	2	2	2	1.6	1.6	1.6	139.09	1231	3	4	2.829e-05	1.6	1.6
1438	7185;8255	IPI00029741	NP_002204	ENSG00000082781	ITGB5	ITGB5{integrin, beta 5 [Source:HGNC Symbol,Acc:6160]}	2	2	2	2	2	2	3.3	3.3	3.3	88.053	799	5	5	2.2183e-05	3.3	3.3
1447	6701;19900	IPI00030131	NP_001027454	ENSG00000120802	TMPO	TMPO{thymopoietin [Source:HGNC Symbol,Acc:11875]}	2	2	2	2	2	2	5.3	5.3	5.3	50.67	454	3	5	1.9335e-09	5.3	5.3
1448	11339;18903	IPI00030167	NP_001034791	ENSG00000152463	OLAH	OLAH{oleoyl-ACP hydrolase [Source:HGNC Symbol,Acc:25625]}	2	2	2	2	2	2	12.5	12.5	12.5	29.931	265	4	2	2.1013e-43	12.5	12.5
1453	378;14719	IPI00658115	NP_068744	ENSG00000118961	C2orf43	C2orf43{chromosome 2 open reading frame 43 [Source:HGNC Symbol,Acc:26145]}	2	2	2	1	2	1	7.3	7.3	7.3	42.668	370	12	11	2.3001e-25	7.3	2.7
1454	368;3446;4020;4227;4475;4492;6547;6731;6873;7860;8842;9845;13027;15524;19304;19853;19874	IPI00030275	NP_057376	ENSG00000126602	TRAP1	TRAP1{TNF receptor-associated protein 1 [Source:HGNC Symbol,Acc:16264]}	17	2	15	16	1	2	27.6	25.6	2.8	80.109	704	46	58	2.1226e-188	25	24.7
1455	6224;9965	IPI00292635	NP_066961	ENSG00000127191	TRAF2	TRAF2{TNF receptor-associated factor 2 [Source:HGNC Symbol,Acc:12032]}	2	2	1	2	1	2	3.8	3.8	3.8	61.383	553	4	6	7.7832e-06	2.4	3.8
1472	5335;10076	IPI00030915	NP_001122082;NP_001122083;NP_005145	ENSG00000138592	USP8	USP8{ubiquitin specific peptidase 8 [Source:HGNC Symbol,Acc:12631]}	2	2	2	2	2	2	1.4	1.4	1.4	127.52	1118	9	5	4.2658e-05	1.4	1.4
1473	3342;17258	IPI00030919	NP_068805	ENSG00000109270	LAMTOR3	LAMTOR3{late endosomal/lysosomal adaptor, MAPK and MTOR activator 3 [Source:HGNC Symbol,Acc:15606]}	2	2	2	2	2	2	30.6	30.6	30.6	13.623	124	5	6	5.3109e-08	30.6	30.6
1484	9179;10602;17781	IPI00031410	NP_004949	ENSG00000198793	MTOR	MTOR{mechanistic target of rapamycin (serine/threonine kinase) [Source:HGNC Symbol,Acc:3942]}	3	2	3	2	2	1	1.1	0.9	0.9	288.89	2549	5	1	1.5377e-06	1.1	0.5
1489	4623;14663	IPI00031485	NP_076931	ENSG00000173141	MRP63	MRP63{mitochondrial ribosomal protein 63 [Source:HGNC Symbol,Acc:14514]}	2	2	2	1	2	1	20.6	20.6	20.6	12.266	102	2	1	1.954e-05	20.6	12.7
1490	10017;10266	IPI00031514	NP_001123584;NP_001193730;NP_031396;NP_853556	ENSG00000111445	RFC5	RFC5{replication factor C (activator 1) 5, 36.5kDa [Source:HGNC Symbol,Acc:9973]}	2	2	2	1	2	1	8.2	8.2	8.2	38.496	340	4	4	6.9178e-06	8.2	4.1
1497	6936;11231	IPI00031558	NP_076952;NP_932155	ENSG00000170502	NUDT9	NUDT9{nudix (nucleoside diphosphate linked moiety X)-type motif 9 [Source:HGNC Symbol,Acc:8056]}	2	2	2	1	2	1	5.4	5.4	5.4	39.125	350	5	7	2.2502e-05	5.4	2.6
1498	14946;19527	IPI00031563	NP_076955	ENSG00000130311	DDA1	DDA1{DET1 and DDB1 associated 1 [Source:HGNC Symbol,Acc:28360]}	2	2	2	2	2	2	16.7	16.7	16.7	11.835	102	2	3	0.00051938	16.7	16.7
1502	1157;12230	IPI00031629	NP_076970	ENSG00000115539	PDCL3	PDCL3{phosducin-like 3 [Source:HGNC Symbol,Acc:28860]}	2	2	2	2	2	2	11.7	11.7	11.7	27.614	239	6	5	2.522e-20	11.7	11.7
1506	13679;18927	IPI00031666	NP_113642	ENSG00000073169	RP3-402G11.5	RP3-402G11.5{Selenoprotein O [Source:UniProtKB/Swiss-Prot,Acc:Q9BVL4]}	2	2	2	2	2	2	2.8	2.8	2.8	73.442	669	2	4	2.1426e-05	2.8	2.8
1510	2907;14639	IPI00031697	NP_076997	ENSG00000110108	TMEM109	TMEM109{transmembrane protein 109 [Source:HGNC Symbol,Acc:28771]}	2	2	1	2	1	2	9.1	9.1	9.1	26.21	243	2	13	8.5059e-15	4.9	9.1
1514	7482;7823	IPI00031768	NP_115786	ENSG00000168172	HOOK3	HOOK3{hook homolog 3 (Drosophila) [Source:HGNC Symbol,Acc:23576]}	2	2	1	1	1	1	3.8	3.8	3.8	83.125	718	1	2	1.9573e-31	1.9	1.8
1515	1643;13315	IPI00925621	NP_001161403;NP_001161400;NP_001161401;NP_002173;NP_001161402;NP_608273	ENSG00000196083	IL1RAP	IL1RAP{interleukin 1 receptor accessory protein [Source:HGNC Symbol,Acc:5995]}	2	2	2	2	2	2	2.8	2.8	2.8	78.602	687	3	3	5.269e-05	2.8	2.8
1535	4887;10140	IPI00032220	NP_000020	ENSG00000135744	AGT	AGT{angiotensinogen (serpin peptidase inhibitor, clade A, member 8) [Source:HGNC Symbol,Acc:333]}	2	2	2	2	2	2	3.9	3.9	3.9	53.154	485	8	15	3.2991e-12	3.9	3.9
1538	3544;15003	IPI00032313	NP_002952;NP_062427	ENSG00000196154	S100A4	S100A4{S100 calcium binding protein A4 [Source:HGNC Symbol,Acc:10494]}	2	2	1	2	1	2	16.8	16.8	16.8	11.728	101	1	6	0.00013539	8.9	16.8
1540	910;9106;16280	IPI00032342	NP_004229	ENSG00000153827	TRIP12	TRIP12{thyroid hormone receptor interactor 12 [Source:HGNC Symbol,Acc:12306]}	3	2	3	3	2	2	1.4	1.1	1.1	225.52	2040	4	3	4.8439e-08	1.4	1.4
1548	8064;19126	IPI00910088	NP_001123996;NP_115882	ENSG00000072958	AP1M1	AP1M1{adaptor-related protein complex 1, mu 1 subunit [Source:HGNC Symbol,Acc:13667]}	2	2	2	2	2	2	7.4	7.4	7.4	49.84	435	3	4	0.0001749	7.4	7.4
1551	9159;17841	IPI00032633	NP_872282	ENSG00000119723	COQ6	COQ6{coenzyme Q6 homolog, monooxygenase (S. cerevisiae) [Source:HGNC Symbol,Acc:20233]}	2	2	1	2	1	2	5.6	5.6	5.6	50.869	468	11	5	1.5369e-18	3.6	5.6
1552	3488;11629	IPI00032799	NP_056518	ENSG00000189306	RRP7A	RRP7A{ribosomal RNA processing 7 homolog A (S. cerevisiae) [Source:HGNC Symbol,Acc:24286]}	2	2	2	2	2	2	3.7	3.7	3.7	36.933	325	6	9	2.7295e-10	3.7	3.7
1556	15049;19682	IPI00032830	NP_056338	ENSG00000076043	REXO2	REXO2{REX2, RNA exonuclease 2 homolog (S. cerevisiae) [Source:HGNC Symbol,Acc:17851]}	2	2	1	2	1	2	8	8	8	26.832	237	2	3	6.4392e-10	5.1	8
1582	4788;12620	IPI00034006	NP_056281	ENSG00000076201	PTPN23	PTPN23{protein tyrosine phosphatase, non-receptor type 23 [Source:HGNC Symbol,Acc:14406]}	2	2	2	2	2	2	1.5	1.5	1.5	178.97	1636	15	3	3.1246e-19	1.5	1.5
1585	11802;17666	IPI00034088	NP_005746	ENSG00000105246	EBI3	EBI3{Epstein-Barr virus induced 3 [Source:HGNC Symbol,Acc:3129]}	2	2	1	2	1	2	10	10	10	25.396	229	3	11	9.0628e-19	5.2	10
1598	5835;19392	IPI00043992	NP_112178	ENSG00000143217	PVRL4	PVRL4{poliovirus receptor-related 4 [Source:HGNC Symbol,Acc:19688]}	2	2	1	2	1	2	4.7	4.7	4.7	55.454	510	2	3	2.1254e-05	2.4	4.7
1604	6767;11045	IPI00045219	NP_001138899;NP_443102;NP_001096045	ENSG00000178996	SNX18	SNX18{sorting nexin 18 [Source:HGNC Symbol,Acc:19245]}	2	2	2	2	2	2	3.2	3.2	3.2	68.894	628	4	6	0.0001299	3.2	3.2
1605	2281;2709;3041;3072;3858;6994;6995;7687;8506;10771;12650;12716;12717;16409;16410;17706;17728	IPI00982476	NP_001124146;NP_001186601;NP_001186603;NP_001186600;NP_001210	ENSG00000128595	CALU	CALU{calumenin [Source:HGNC Symbol,Acc:1458]}	17	2	15	14	1	2	55.1	6.8	6.8	38.078	323	2	8	0	52.9	39.9
1614	8052;19814	IPI00056324	NP_115759	ENSG00000163755	HPS3	HPS3{Hermansky-Pudlak syndrome 3 [Source:HGNC Symbol,Acc:15597]}	2	2	1	1	1	1	1.6	1.6	1.6	113.73	1004	2	7	4.2868e-05	1	0.6
1623	5696;11190	IPI00059762	NP_620149	ENSG00000143353	LYPLAL1	LYPLAL1{lysophospholipase-like 1 [Source:HGNC Symbol,Acc:20440]}	2	2	2	2	2	2	6.8	6.8	6.8	26.316	237	8	11	1.6012e-06	6.8	6.8
1631	4880;11707	IPI00061403	NP_776195;NP_001182143	ENSG00000181704	YIPF6	YIPF6{Yip1 domain family, member 6 [Source:HGNC Symbol,Acc:28304]}	2	2	2	2	2	2	3.8	3.8	3.8	26.256	236	33	28	3.6695e-07	3.8	3.8
1634	5127;17026	IPI00061780	NP_113671	ENSG00000078747	ITCH	ITCH{itchy E3 ubiquitin protein ligase homolog (mouse) [Source:HGNC Symbol,Acc:13890]}	2	2	2	1	2	1	3.2	3.2	3.2	102.8	903	4	3	1.991e-09	3.2	1.6
1640	5886;16973	IPI00063130	NP_001138888;NP_212133;NP_940938	ENSG00000105518	TMEM205	TMEM205{transmembrane protein 205 [Source:HGNC Symbol,Acc:29631]}	2	2	2	2	2	2	15.9	15.9	15.9	21.198	189	2	9	5.5437e-18	15.9	15.9
1643	7880;19890	IPI00063729	NP_115737	ENSG00000051596	THOC3	THOC3{THO complex 3 [Source:HGNC Symbol,Acc:19072]}	2	2	2	1	2	1	4.2	4.2	4.2	41.582	378	7	6	5.1072e-08	4.2	2.6
1647	3430;13453	IPI00064162	NP_079330	ENSG00000175073	VCPIP1	VCPIP1{valosin containing protein (p97)/p47 complex interacting protein 1 [Source:HGNC Symbol,Acc:30897]}	2	2	2	2	2	2	1.7	1.7	1.7	134.32	1222	10	9	6.1859e-13	1.7	1.7
1648	6665;11963;16758	IPI00064193	NP_061895	ENSG00000166479	TMX3	TMX3{thioredoxin-related transmembrane protein 3 [Source:HGNC Symbol,Acc:24718]}	3	2	2	3	1	2	6.8	5.5	5.5	51.871	454	3	4	1.578e-15	3.7	6.8
1654	826;9412	IPI00742677	NP_005680	ENSG00000115657	ABCB6	ABCB6{ATP-binding cassette, sub-family B (MDR/TAP), member 6 [Source:HGNC Symbol,Acc:47]}	2	2	2	2	2	2	2.4	2.4	2.4	93.884	842	9	7	1.0318e-05	2.4	2.4
1655	8722;12719;18008	IPI00069084	NP_003487	ENSG00000196367	TRRAP	TRRAP{transformation/transcription domain-associated protein [Source:HGNC Symbol,Acc:12347]}	3	2	2	3	1	2	0.6	0.4	0.4	437.6	3859	2	6	2.5635e-06	0.4	0.6
1660	753;8633;17696	IPI00071318	NP_060502;NP_958815	ENSG00000007392	LUC7L	LUC7L{LUC7-like (S. cerevisiae) [Source:HGNC Symbol,Acc:6723]}	3	2	3	3	2	2	8.1	5.4	5.4	43.727	371	10	7	8.2719e-13	8.1	8.1
1663	9594;13468	IPI00073179	NP_075067	ENSG00000139719;ENSG00000256861	VPS33A;RP11-512M8.5	VPS33A{vacuolar protein sorting 33 homolog A (S. cerevisiae) [Source:HGNC Symbol,Acc:18179]};RP11-512M8.5{}	2	2	2	2	2	2	3.7	3.7	3.7	67.61	596	8	7	6.0956e-11	3.7	3.7
1666	11153;11875	IPI00073763	NP_060259	ENSG00000168758	SEMA4C	SEMA4C{sema domain, immunoglobulin domain (Ig), transmembrane domain (TM) and short cytoplasmic domain, (semaphorin) 4C [Source:HGNC Symbol,Acc:10731]}	2	2	2	1	2	1	3.2	3.2	3.2	92.622	833	3	1	1.3808e-26	3.2	1.4
1682	5507;14923	IPI00100030	NP_057021;NP_001171657;NP_001171659	ENSG00000124155	PIGT	PIGT{phosphatidylinositol glycan anchor biosynthesis, class T [Source:HGNC Symbol,Acc:14938]}	2	2	2	2	2	2	5.4	5.4	5.4	65.699	578	3	3	1.7909e-13	5.4	5.4
1688	6353;18863	IPI00100239	NP_057109;NP_001070648	ENSG00000197006	METTL9	METTL9{methyltransferase like 9 [Source:HGNC Symbol,Acc:24586]}	2	2	2	2	2	2	7.5	7.5	7.5	36.536	318	2	2	1.5131e-07	7.5	7.5
1692	11452;18887	IPI00100731	NP_001167630;NP_071354;NP_001167631	ENSG00000104611	SH2D4A	SH2D4A{SH2 domain containing 4A [Source:HGNC Symbol,Acc:26102]}	2	2	1	2	1	2	6.2	6.2	6.2	52.726	454	2	3	6.912e-10	2.2	6.2
1698	8232;15440;19146	IPI00101298	NP_660344;NP_001128508;NP_057162;NP_001191407	ENSG00000175106;ENSG00000171928	FAM18B2;FAM18B1	FAM18B2{family with sequence similarity 18, member B2 [Source:HGNC Symbol,Acc:30453]};FAM18B1{family with sequence similarity 18, member B1 [Source:HGNC Symbol,Acc:20399]}	3	2	3	3	2	2	8.7	8.7	6.5	31.104	276	5	7	3.4266e-05	8.7	8.7
1700	6566;11829	IPI00101608	NP_001026887;NP_001070883;NP_056328	ENSG00000163703	CRELD1	CRELD1{cysteine-rich with EGF-like domains 1 [Source:HGNC Symbol,Acc:14630]}	2	2	2	2	2	2	2.1	2.1	2.1	45.941	422	7	5	6.7469e-06	2.1	2.1
1701	4579;19429	IPI00101664	NP_078954	ENSG00000137513	NARS2	NARS2{asparaginyl-tRNA synthetase 2, mitochondrial (putative) [Source:HGNC Symbol,Acc:26274]}	2	2	2	2	2	2	4.6	4.6	4.6	54.089	477	3	4	2.335e-05	4.6	4.6
1704	1431;12874	IPI00101987	NP_001028721;NP_054892	ENSG00000105393	BABAM1	BABAM1{BRISC and BRCA1 A complex member 1 [Source:HGNC Symbol,Acc:25008]}	2	2	2	2	2	2	5.5	5.5	5.5	36.56	329	6	4	3.384e-08	5.5	5.5
1708	7206;11200	IPI00807625	NP_055848	ENSG00000187239	FNBP1	FNBP1{formin binding protein 1 [Source:HGNC Symbol,Acc:17069]}	2	2	2	2	2	2	2.8	2.8	2.8	71.306	617	5	6	8.1669e-05	2.8	2.8
1720	16555;18753	IPI00103380	NP_071926	ENSG00000120318	ARAP3	ARAP3{ArfGAP with RhoGAP domain, ankyrin repeat and PH domain 3 [Source:HGNC Symbol,Acc:24097]}	2	2	1	2	1	2	1.1	1.1	1.1	169.84	1544	2	3	3.6218e-05	0.7	1.1
1736	5029;6937	IPI00106495	NP_071741	ENSG00000109805	NCAPG	NCAPG{non-SMC condensin I complex, subunit G [Source:HGNC Symbol,Acc:24304]}	2	2	2	2	2	2	2	2	2	114.33	1015	9	8	2.0437e-07	2	2
1739	1403;2102;5603;8016;14378;16225	IPI00106646	NP_057260	ENSG00000078808	SDF4	SDF4{stromal cell derived factor 4 [Source:HGNC Symbol,Acc:24188]}	6	2	5	5	2	2	22.4	22.4	8.3	41.806	362	9	14	4.3757e-39	19.1	18
1745	1015;5288	IPI00107104	NP_057584	ENSG00000102390	CXorf26	CXorf26{chromosome X open reading frame 26 [Source:HGNC Symbol,Acc:28790]}	2	2	1	2	1	2	10.3	10.3	10.3	26.056	233	2	4	0.00012152	4.3	10.3
1758	4572;4670	IPI00143753	NP_001073884	ENSG00000163714	U2SURP	U2SURP{U2 snRNP-associated SURP domain containing [Source:HGNC Symbol,Acc:30855]}	2	2	2	2	2	2	2.1	2.1	2.1	118.29	1029	5	4	1.8669e-12	2.1	2.1
1760	538;8360	IPI00145260	NP_001010867	ENSG00000181873	IBA57	IBA57{IBA57, iron-sulfur cluster assembly homolog (S. cerevisiae) [Source:HGNC Symbol,Acc:27302]}	2	2	2	2	2	2	6.5	6.5	6.5	38.155	356	5	6	2.698e-07	6.5	6.5
1765	8252;15659	IPI00149849	NP_056201;NP_001182068	ENSG00000103051	COG4	COG4{component of oligomeric golgi complex 4 [Source:HGNC Symbol,Acc:18620]}	2	2	2	2	2	2	3.4	3.4	3.4	89.5	789	4	4	9.6049e-10	3.4	3.4
1766	6772;16894	IPI00216047	NP_003066;NP_001123892;NP_620706;NP_003065	ENSG00000139613;ENSG00000173473	SMARCC2;SMARCC1	SMARCC2{SWI/SNF related, matrix associated, actin dependent regulator of chromatin, subfamily c, member 2 [Source:HGNC Symbol,Acc:11105]};SMARCC1{SWI/SNF related, matrix associated, actin dependent regulator of chromatin, subfamily c, member 1 [Source:HGNC Symbol,Acc:11104]}	2	2	2	2	2	2	1.8	1.8	1.8	132.88	1214	3	3	2.1072e-06	1.8	1.8
1768	13140;17063	IPI00151358	NP_110409	ENSG00000049656	CLPTM1L	CLPTM1L{CLPTM1-like [Source:HGNC Symbol,Acc:24308]}	2	2	2	2	2	2	4.1	4.1	4.1	62.228	538	13	11	1.1158e-35	4.1	4.1
1770	9075;15916	IPI00790445	NP_001191732;NP_001020527;NP_001136150	ENSG00000177119	ANO6	ANO6{anoctamin 6 [Source:HGNC Symbol,Acc:25240]}	2	2	2	2	2	2	2.1	2.1	2.1	108.43	931	7	8	4.9616e-19	2.1	2.1
1775	1828;5743	IPI00152432	NP_001135938;NP_597700	ENSG00000166123	GPT2	GPT2{glutamic pyruvate transaminase (alanine aminotransferase) 2 [Source:HGNC Symbol,Acc:18062]}	2	2	2	2	2	2	4.4	4.4	4.4	57.903	523	3	3	6.1797e-10	4.4	4.4
1777	866;18339	IPI00152658	NP_598001	ENSG00000151414	NEK7	NEK7{NIMA (never in mitosis gene a)-related kinase 7 [Source:HGNC Symbol,Acc:13386]}	2	2	2	2	2	2	8.3	8.3	8.3	34.551	302	4	4	1.0122e-08	8.3	8.3
1778	1877;7615	IPI00152665	NP_061859	ENSG00000125089	AC104650.1	AC104650.1{SH3 domain and tetratricopeptide repeats-containing protein 1 [Source:UniProtKB/Swiss-Prot,Acc:Q8TE82]}	2	2	2	2	2	2	2	2	2	146.96	1336	11	6	8.1381e-08	2	2
1779	12058;19319	IPI00152671	NP_659400	ENSG00000176853	FAM91A1	FAM91A1{family with sequence similarity 91, member A1 [Source:HGNC Symbol,Acc:26306]}	2	2	2	2	2	2	2.4	2.4	2.4	93.908	838	3	2	0.00013538	2.4	2.4
1780	6552;19850	IPI00152695	NP_079498	ENSG00000164091	WDR82	WDR82{WD repeat domain 82 [Source:HGNC Symbol,Acc:28826]}	2	2	1	2	1	2	8.9	8.9	8.9	35.079	313	1	5	3.2835e-12	4.5	8.9
1791	791;8210	IPI00300386	NP_997657;NP_004118	ENSG00000169727	GPS1	GPS1{G protein pathway suppressor 1 [Source:HGNC Symbol,Acc:4549]}	2	2	2	2	2	2	4.7	4.7	4.7	59.942	550	5	7	2.7923e-16	4.7	4.7
1792	9332;16117	IPI00398009	NP_078934	ENSG00000196497	IPO4	IPO4{importin 4 [Source:HGNC Symbol,Acc:19426]}	2	2	2	1	2	1	2.7	2.7	2.7	118.9	1083	3	1	8.4203e-17	2.7	1.6
1796	13481;14340	IPI00157734	NP_009208	ENSG00000180104	EXOC3	EXOC3{exocyst complex component 3 [Source:HGNC Symbol,Acc:30378]}	2	2	2	1	2	1	2.8	2.8	2.8	86.844	756	3	3	2.2899e-08	2.8	1.1
1797	2292;11322	IPI00157757	NP_073602;NP_001152763	ENSG00000135596	MICAL1	MICAL1{microtubule associated monoxygenase, calponin and LIM domain containing 1 [Source:HGNC Symbol,Acc:20619]}	2	2	2	1	2	1	1.8	1.8	1.8	119.82	1086	3	7	1.8811e-06	1.8	0.7
1808	1228;9123	IPI00163230	NP_006824	ENSG00000168090	COPS6	COPS6{COP9 constitutive photomorphogenic homolog subunit 6 (Arabidopsis) [Source:HGNC Symbol,Acc:21749]}	2	2	2	2	2	2	8	8	8	36.163	327	2	2	3.6241e-10	8	8
1812	3354;11145	IPI00163849	NP_067058	ENSG00000127527	EPS15L1	EPS15L1{epidermal growth factor receptor pathway substrate 15-like 1 [Source:HGNC Symbol,Acc:24634]}	2	2	1	2	1	2	2.6	2.6	2.6	99.606	910	1	10	7.4976e-36	1.5	2.6
1815	6496;8270	IPI00966450	NP_653172	ENSG00000138767	CNOT6L	CNOT6L{CCR4-NOT transcription complex, subunit 6-like [Source:HGNC Symbol,Acc:18042]}	2	2	2	2	2	2	3.6	3.6	3.6	63.049	555	5	12	1.7283e-25	3.6	3.6
1818	789;15829	IPI00164610	NP_055988	ENSG00000065882	TBC1D1	TBC1D1{TBC1 (tre-2/USP6, BUB2, cdc16) domain family, member 1 [Source:HGNC Symbol,Acc:11578]}	2	2	2	1	2	1	2.5	2.5	2.5	133.08	1168	10	6	2.5581e-16	2.5	0.9
1819	9542;14228	IPI00295487	NP_071396;NP_001099036;NP_001099037;NP_001099038	ENSG00000137177	KIF13A	KIF13A{kinesin family member 13A [Source:HGNC Symbol,Acc:14566]}	2	2	2	2	2	2	1.4	1.4	1.4	202.31	1805	6	7	1.3033e-05	1.4	1.4
1826	2253;14019;14892	IPI00165357	NP_065795	ENSG00000057935	MTA3	MTA3{metastasis associated 1 family, member 3 [Source:HGNC Symbol,Acc:23784]}	3	2	3	3	2	2	5.4	5.4	4.2	67.503	594	6	5	2.6249e-12	5.4	5.4
1830	7537;8011	IPI00299594	NP_003864;NP_001019799;NP_001019800	ENSG00000099250	NRP1	NRP1{neuropilin 1 [Source:HGNC Symbol,Acc:8004]}	2	2	2	2	2	2	3.5	3.5	3.5	103.13	923	4	4	7.8812e-09	3.5	3.5
1841	4661;19733	IPI00166132	NP_072047	ENSG00000206286;ENSG00000223501;ENSG00000224455;ENSG00000225590;ENSG00000228425;ENSG00000236014	VPS52	VPS52{vacuolar protein sorting 52 homolog (S. cerevisiae) [Source:HGNC Symbol,Acc:10518]}	2	2	1	2	1	2	2.6	2.6	2.6	82.22	723	11	10	6.7717e-05	1.1	2.6
1843	1274;6615	IPI00166211	NP_001034864	ENSG00000176092	AIM1L	AIM1L{absent in melanoma 1-like [Source:HGNC Symbol,Acc:17295]}	2	2	2	2	2	2	1.6	1.6	1.6	177.91	1661	4	5	1.8201e-16	1.6	1.6
1844	14895;17639	IPI00166377	NP_694942	ENSG00000154914	USP43	USP43{ubiquitin specific peptidase 43 [Source:HGNC Symbol,Acc:20072]}	2	2	2	1	2	1	2.1	2.1	2.1	122.95	1124	9	1	1.349e-06	2.1	0.8
1853	16054;17004	IPI00760837	NP_775882;NP_001035894	ENSG00000171262	FAM98B	FAM98B{family with sequence similarity 98, member B [Source:HGNC Symbol,Acc:26773]}	2	2	1	2	1	2	6.5	6.5	6.5	45.547	433	2	3	4.4624e-22	2.8	6.5
1861	1770;14358;18891	IPI00410259	NP_001127910;NP_001127911;NP_001127909;NP_665696	ENSG00000144824	PHLDB2	PHLDB2{pleckstrin homology-like domain, family B, member 2 [Source:HGNC Symbol,Acc:29573]}	3	2	2	3	1	2	1.6	1.1	1.1	142.16	1253	11	9	1.2915e-05	1	1.6
1862	3818;8195	IPI00168479	NP_658985	ENSG00000163382	APOA1BP	APOA1BP{apolipoprotein A-I binding protein [Source:HGNC Symbol,Acc:18453]}	2	2	2	2	2	2	7.5	7.5	7.5	33.627	307	4	5	8.9725e-09	7.5	7.5
1864	8458;17584	IPI00168624	NP_067638;NP_001170902;NP_001170899	ENSG00000111199	TRPV4	TRPV4{transient receptor potential cation channel, subfamily V, member 4 [Source:HGNC Symbol,Acc:18083]}	2	2	2	2	2	2	2.5	2.5	2.5	98.28	871	5	6	1.6325e-08	2.5	2.5
1865	15013;15933	IPI00335771	NP_055880	ENSG00000110723	EXPH5	EXPH5{exophilin 5 [Source:HGNC Symbol,Acc:30578]}	2	2	2	1	2	1	1.1	1.1	1.1	222.52	1989	6	6	1.3145e-05	1.1	0.5
1866	2700;5979	IPI00946792	NP_002812;NP_690619;NP_690621;NP_690620	ENSG00000112655	PTK7	PTK7{PTK7 protein tyrosine kinase 7 [Source:HGNC Symbol,Acc:9618]}	2	2	2	1	2	1	2.4	2.4	2.4	119.2	1078	3	2	1.4872e-15	2.4	1.4
1877	11542;18231	IPI00170924	NP_612638	ENSG00000111911	HINT3	HINT3{histidine triad nucleotide binding protein 3 [Source:HGNC Symbol,Acc:18468]}	2	2	2	1	2	1	16.5	16.5	16.5	20.361	182	4	1	5.2052e-13	16.5	8.2
1881	5083;14047	IPI00743343	NP_689559	ENSG00000167703	SLC43A2	SLC43A2{solute carrier family 43, member 2 [Source:HGNC Symbol,Acc:23087]}	2	2	2	2	2	2	3.1	3.1	3.1	63.149	573	15	12	7.5739e-07	3.1	3.1
1882	6923;9866	IPI00171134	NP_001129069;NP_060554	ENSG00000115355	CCDC88A	CCDC88A{coiled-coil domain containing 88A [Source:HGNC Symbol,Acc:25523]}	2	2	2	2	2	2	1.3	1.3	1.3	216.04	1871	5	4	8.6513e-07	1.3	1.3
1883	1347;17559	IPI00793111	NP_149014	ENSG00000105137	SYDE1	SYDE1{synapse defective 1, Rho GTPase, homolog 1 (C. elegans) [Source:HGNC Symbol,Acc:25824]}	2	2	2	2	2	2	3.1	3.1	3.1	79.792	735	10	10	3.5142e-28	3.1	3.1
1886	3418;4000;8921;8936;14710	IPI00216719	NP_829884;NP_829883	ENSG00000082805	ERC1	ERC1{ELKS/RAB6-interacting/CAST family member 1 [Source:HGNC Symbol,Acc:17072]}	5	2	3	5	2	2	3.5	3.5	1.7	128.08	1116	3	12	1.4514e-08	2.2	3.5
1892	5644;14681	IPI00171473	NP_006099	ENSG00000152268	SPON1	SPON1{spondin 1, extracellular matrix protein [Source:HGNC Symbol,Acc:11252]}	2	2	2	1	2	1	2.2	2.2	2.2	90.973	807	4	1	0.00025544	2.2	1
1899	37;194;384;2309;4123;4452;4453;4455;4578;4905;5397;5503;5707;5896;6155;7162;8550;9645;9844;11389;11394;12801;12802;12812;12820;12824;12827;13178;13504;14736;17631	IPI00171903	NP_005959;NP_112480	ENSG00000099783	HNRNPM	HNRNPM{heterogeneous nuclear ribonucleoprotein M [Source:HGNC Symbol,Acc:5046]}	31	2	22	29	0	2	45.5	45.5	5.5	77.515	730	84	179	0	32.9	42.7
1904	572;7193	IPI00172656	NP_055428	ENSG00000113194	FAF2	FAF2{Fas associated factor family member 2 [Source:HGNC Symbol,Acc:24666]}	2	2	2	2	2	2	7.9	7.9	7.9	52.623	445	3	4	9.0401e-105	7.9	7.9
1905	7681;12542	IPI00174390	NP_808881	ENSG00000174840	PDE12	PDE12{phosphodiesterase 12 [Source:HGNC Symbol,Acc:25386]}	2	2	2	2	2	2	3.6	3.6	3.6	67.351	609	5	6	2.2276e-37	3.6	3.6
1915	1052;9779	IPI00177437	NP_057736	ENSG00000101343	CRNKL1	CRNKL1{crooked neck pre-mRNA splicing factor-like 1 (Drosophila) [Source:HGNC Symbol,Acc:15762]}	2	2	2	2	2	2	2.6	2.6	2.6	100.45	848	9	10	1.6101e-14	2.6	2.6
1920	1301;7512	IPI00177940	NP_065956	ENSG00000240857	RDH14	RDH14{retinol dehydrogenase 14 (all-trans/9-cis/11-cis) [Source:HGNC Symbol,Acc:19979]}	2	2	1	2	1	2	4.8	4.8	4.8	36.864	336	1	5	0.00032775	2.4	4.8
1921	15902;16405	IPI00177965	NP_689942	ENSG00000178425	NT5DC1	NT5DC1{5'-nucleotidase domain containing 1 [Source:HGNC Symbol,Acc:21556]}	2	2	1	2	1	2	4	4	4	51.844	455	2	4	1.0314e-05	1.3	4
1929	5891;19734	IPI00645446	NP_001131026;NP_054779	ENSG00000232119	MCTS1	MCTS1{malignant T cell amplified sequence 1 [Source:HGNC Symbol,Acc:23357]}	2	2	2	2	2	2	16.5	16.5	16.5	20.55	182	6	4	1.1861e-33	16.5	16.5
1935	9453;16598;17598	IPI00179415	NP_000935;NP_001124163;NP_001124164;NP_001135825	ENSG00000138814;ENSG00000107758	PPP3CA;PPP3CB	PPP3CA{protein phosphatase 3, catalytic subunit, alpha isozyme [Source:HGNC Symbol,Acc:9314]};PPP3CB{protein phosphatase 3, catalytic subunit, beta isozyme [Source:HGNC Symbol,Acc:9315]}	3	2	2	3	1	2	4.2	3.1	3.1	58.687	521	2	7	3.445e-07	3.1	4.2
1937	13832;17185	IPI00179473	NP_001135770;NP_001135771;NP_003891	ENSG00000161011	SQSTM1	SQSTM1{sequestosome 1 [Source:HGNC Symbol,Acc:11280]}	2	2	1	2	1	2	7.5	7.5	7.5	47.687	440	1	4	6.2849e-16	4.1	7.5
1942	13166;14676	IPI00180154	NP_002964	ENSG00000204842	ATXN2	ATXN2{ataxin 2 [Source:HGNC Symbol,Acc:10555]}	2	2	1	2	1	2	1.8	1.8	1.8	140.28	1313	2	4	3.1957e-09	0.8	1.8
1947	14967;19284	IPI00180764	NP_008998;NP_001186084;NP_001186086;NP_001186085;NP_001186087	ENSG00000136504	MYST2	MYST2{MYST histone acetyltransferase 2 [Source:HGNC Symbol,Acc:17016]}	2	2	2	2	2	2	4.6	4.6	4.6	70.642	611	2	4	4.323e-12	4.6	4.6
1948	1722;5589	IPI00641579	NP_001271	ENSG00000099622	CIRBP	CIRBP{cold inducible RNA binding protein [Source:HGNC Symbol,Acc:1982]}	2	2	1	2	1	2	7.7	7.7	7.7	31.918	297	3	6	3.3048e-06	4.7	7.7
1950	4178;10642;14809	IPI00477231	NP_036347;NP_001135906	ENSG00000198408	MGEA5	MGEA5{meningioma expressed antigen 5 (hyaluronidase) [Source:HGNC Symbol,Acc:7056]}	3	2	3	2	2	1	2.4	1.8	1.8	111.18	998	4	2	7.5967e-05	2.4	1.6
1951	5016;5411	IPI00329528	NP_001165375;NP_055518	ENSG00000214619;ENSG00000145041	AC092037.1;VPRBP	AC092037.1{Protein VPRBP [Source:UniProtKB/Swiss-Prot,Acc:Q9Y4B6]};VPRBP{Vpr (HIV-1) binding protein [Source:HGNC Symbol,Acc:30911]}	2	2	1	2	1	2	1.5	1.5	1.5	169.01	1507	11	10	1.3942e-12	0.5	1.5
1954	4838;5166	IPI00181728	NP_060791	ENSG00000113460	BRIX1	BRIX1{BRX1, biogenesis of ribosomes, homolog (S. cerevisiae) [Source:HGNC Symbol,Acc:24170]}	2	2	0	2	0	2	5.7	5.7	5.7	41.401	353		5	2.0069e-12	0	5.7
1960	12446;15895	IPI00985019	NP_000982	ENSG00000108107	RPL28	RPL28{ribosomal protein L28 [Source:HGNC Symbol,Acc:10330]}	2	2	0	2	0	2	14.3	14.3	14.3	16.127	140		13	7.122e-08	0	14.3
1967	2268;3650	IPI00183171	NP_001017524;NP_036371	ENSG00000142082	SIRT3	SIRT3{sirtuin 3 [Source:HGNC Symbol,Acc:14931]}	2	2	2	0	2	0	6.7	6.7	6.7	45.594	417	3		1.9931e-06	6.7	0
1968	2517;3383;14889	IPI00646361	NP_005076	ENSG00000126883	NUP214	NUP214{nucleoporin 214kDa [Source:HGNC Symbol,Acc:8064]}	3	2	1	3	1	2	1.5	1.2	1.2	215.4	2093	4	2	6.3147e-05	0.3	1.5
1973	3143;3144	IPI00183695	NP_002957	ENSG00000197747	S100A10	S100A10{S100 calcium binding protein A10 [Source:HGNC Symbol,Acc:10487]}	2	2	1	2	1	2	17.5	17.5	17.5	11.203	97	5	12	5.7057e-51	17.5	17.5
1978	17707;17721	IPI00413788	NP_001130029;NP_001130030;NP_066011	ENSG00000148358	GPR107	GPR107{G protein-coupled receptor 107 [Source:HGNC Symbol,Acc:17830]}	2	2	2	2	2	2	2.8	2.8	2.8	66.99	600	22	18	1.7501e-17	2.8	2.8
1981	9302;15369	IPI00909064	NP_001035994;NP_001035995;NP_001035996;NP_001035997;NP_079509	ENSG00000068120	COASY	COASY{CoA synthase [Source:HGNC Symbol,Acc:29932]}	2	2	2	2	2	2	4.7	4.7	4.7	65.339	593	4	13	2.4419e-13	4.7	4.7
1983	4610;8849	IPI00184851	NP_006091	ENSG00000064225	ST3GAL6	ST3GAL6{ST3 beta-galactoside alpha-2,3-sialyltransferase 6 [Source:HGNC Symbol,Acc:18080]}	2	2	2	1	2	1	6.6	6.6	6.6	38.213	331	3	2	0.00080682	6.6	2.4
1984	2941;10259	IPI00657642	NP_777591	ENSG00000152133	CCDC75	CCDC75{coiled-coil domain containing 75 [Source:HGNC Symbol,Acc:26768]}	2	2	2	2	2	2	6.2	6.2	6.2	30.198	259	7	11	2.9341e-09	6.2	6.2
1995	3942;7392	IPI00186966	NP_647593;NP_647594;NP_647597;NP_647595;NP_647596;NP_647598;NP_647599;NP_004296;NP_647600;NP_647601	ENSG00000136717	BIN1	BIN1{bridging integrator 1 [Source:HGNC Symbol,Acc:1052]}	2	2	2	1	2	1	3.9	3.9	3.9	64.699	593	2	1	7.3194e-19	3.9	2.5
1998	393;17507	IPI00921966	NP_000848	ENSG00000061918	GUCY1B3	GUCY1B3{guanylate cyclase 1, soluble, beta 3 [Source:HGNC Symbol,Acc:4687]}	2	2	2	1	2	1	2.7	2.7	2.7	73.071	641	10	6	0.0003372	2.7	1.6
2013	1744;7303;8489;9258;10382;12938;16998	IPI00215919	NP_001653	ENSG00000004059	ARF5	ARF5{ADP-ribosylation factor 5 [Source:HGNC Symbol,Acc:658]}	7	2	6	7	1	2	37.8	8.3	8.3	20.529	180	1	3	1.446e-181	33.3	37.8
2042	484;6965;13273;17607;18500	IPI00216457	NP_001035807;NP_003507;NP_003508	ENSG00000183558;ENSG00000203812;ENSG00000184260	HIST2H2AA3;HIST2H2AA4;HIST2H2AC	HIST2H2AA3{histone cluster 2, H2aa3 [Source:HGNC Symbol,Acc:4736]};HIST2H2AA4{histone cluster 2, H2aa4 [Source:HGNC Symbol,Acc:29668]};HIST2H2AC{histone cluster 2, H2ac [Source:HGNC Symbol,Acc:4738]}	5	2	5	4	2	1	54.6	54.6	36.9	14.095	130	77	104	1.0845e-105	54.6	32.3
2044	8090;16061	IPI00374740	NP_001768;NP_942088	ENSG00000196776	CD47	CD47{CD47 molecule [Source:HGNC Symbol,Acc:1682]}	2	2	2	2	2	2	5.9	5.9	5.9	35.213	323	2	5	2.5317e-07	5.9	5.9
2048	15811;17222	IPI00216654	NP_004732	ENSG00000166197	NOLC1	NOLC1{nucleolar and coiled-body phosphoprotein 1 [Source:HGNC Symbol,Acc:15608]}	2	2	0	2	0	2	3.5	3.5	3.5	74.746	709		10	4.5658e-06	0	3.5
2055	484;6966;12408;13273	IPI00216730	NP_778235	ENSG00000184270	HIST2H2AB	HIST2H2AB{histone cluster 2, H2ab [Source:HGNC Symbol,Acc:20508]}	4	2	4	4	2	2	24.6	12.3	12.3	13.995	130	5	4	1.5748e-13	24.6	24.6
2064	7684;18815	IPI00217049	NP_058197;NP_002526	ENSG00000111335	OAS2	OAS2{2'-5'-oligoadenylate synthetase 2, 69/71kDa [Source:HGNC Symbol,Acc:8087]}	2	2	2	2	2	2	2.1	2.1	2.1	82.43	719	4	4	0.00042053	2.1	2.1
2066	1617;2074	IPI00217056	NP_055077	ENSG00000110811	LEPREL2	LEPREL2{leprecan-like 2 [Source:HGNC Symbol,Acc:19318]}	2	2	2	2	2	2	4.6	4.6	4.6	81.836	736	4	5	1.3047e-62	4.6	4.6
2070	4971;10876	IPI00893197	NP_001180326;NP_066954;NP_821067;NP_821068	ENSG00000119383	PPP2R4	PPP2R4{protein phosphatase 2A activator, regulatory subunit 4 [Source:HGNC Symbol,Acc:9308]}	2	2	2	2	2	2	4.8	4.8	4.8	41.757	373	6	7	2.4207e-05	4.8	4.8
2072	4313;19810	IPI00217355	NP_054872	ENSG00000122299	ZC3H7A	ZC3H7A{zinc finger CCCH-type containing 7A [Source:HGNC Symbol,Acc:30959]}	2	2	2	1	2	1	2.1	2.1	2.1	110.54	971	3	1	2.3012e-05	2.1	1.4
2083	6279;17553;17952;18110	IPI00217519	NP_005393	ENSG00000006451	RALA	RALA{v-ral simian leukemia viral oncogene homolog A (ras related) [Source:HGNC Symbol,Acc:9839]}	4	2	3	4	1	2	20.4	11.7	11.7	23.567	206	1	7	1.1565e-49	16	20.4
2089	8720;14887	IPI00217617	NP_775767	ENSG00000150054	MPP7	MPP7{membrane protein, palmitoylated 7 (MAGUK p55 subfamily member 7) [Source:HGNC Symbol,Acc:26542]}	2	2	2	2	2	2	2.8	2.8	2.8	65.523	576	3	4	0.00065134	2.8	2.8
2093	768;7145	IPI00217759	NP_775811	ENSG00000196968	FUT11	FUT11{fucosyltransferase 11 (alpha (1,3) fucosyltransferase) [Source:HGNC Symbol,Acc:19233]}	2	2	2	2	2	2	5.7	5.7	5.7	55.815	492	4	3	0.00020897	5.7	5.7
2096	8007;15353;18858	IPI00217831	NP_149112	ENSG00000076513	ANKRD13A	ANKRD13A{ankyrin repeat domain 13A [Source:HGNC Symbol,Acc:21268]}	3	2	3	2	2	1	5.3	5.3	3.2	67.618	590	15	11	1.8704e-21	5.3	3.2
2098	6105;15127	IPI00217862	NP_004695	ENSG00000114767	RRP9	RRP9{ribosomal RNA processing 9, small subunit (SSU) processome component, homolog (yeast) [Source:HGNC Symbol,Acc:16829]}	2	2	1	1	1	1	4.8	4.8	4.8	51.84	475	1	6	1.4289e-08	1.7	3.2
2101	1332;11197	IPI00217918	NP_714913	ENSG00000179387	ELMOD2	ELMOD2{ELMO/CED-12 domain containing 2 [Source:HGNC Symbol,Acc:28111]}	2	2	2	1	2	1	9.2	9.2	9.2	34.96	293	14	12	1.666e-13	9.2	3.1
2102	934;18315	IPI00217920	NP_699160;NP_001138868	ENSG00000161618	ALDH16A1	ALDH16A1{aldehyde dehydrogenase 16 family, member A1 [Source:HGNC Symbol,Acc:28114]}	2	2	0	2	0	2	2.7	2.7	2.7	85.126	802		10	0.00047754	0	2.7
2123	1439;7753	IPI00218568	NP_000272	ENSG00000166228	PCBD1	PCBD1{pterin-4 alpha-carbinolamine dehydratase/dimerization cofactor of hepatocyte nuclear factor 1 alpha [Source:HGNC Symbol,Acc:8646]}	2	2	1	2	1	2	22.1	22.1	22.1	11.999	104	3	7	5.1436e-09	12.5	22.1
2127	6493;12027	IPI00218646	NP_000388	ENSG00000165168	CYBB	CYBB{cytochrome b-245, beta polypeptide [Source:HGNC Symbol,Acc:2578]}	2	2	2	2	2	2	3.3	3.3	3.3	65.335	570	5	6	0.00045755	3.3	3.3
2128	1238;9112;13773	IPI00333753	NP_001161744;NP_001093422;NP_002213	ENSG00000150995	ITPR1	ITPR1{inositol 1,4,5-trisphosphate receptor, type 1 [Source:HGNC Symbol,Acc:6180]}	3	2	3	2	2	1	1.3	0.9	0.9	313.94	2758	9	1	1.0825e-30	1.3	0.7
2133	9149;19913	IPI01010259	NP_000437	ENSG00000005421	PON1	PON1{paraoxonase 1 [Source:HGNC Symbol,Acc:9204]}	2	2	2	2	2	2	5.6	5.6	5.6	39.721	355	18	16	1.2136e-07	5.6	5.6
2140	1510;19115	IPI00640044	NP_000560;NP_001121065;NP_001121067;NP_001121064;NP_001121068	ENSG00000203747	FCGR3A	FCGR3A{Fc fragment of IgG, low affinity IIIa, receptor (CD16a) [Source:HGNC Symbol,Acc:3619]}	2	2	2	2	2	2	7.9	7.9	7.9	32.69	290	3	3	0.00028487	7.9	7.9
2146	782;6703	IPI00794806	NP_001155250;NP_001155251;NP_001155252;NP_001155253;NP_060914	ENSG00000164951	PDP1	PDP1{pyruvate dehyrogenase phosphatase catalytic subunit 1 [Source:HGNC Symbol,Acc:9279]}	2	2	2	2	2	2	4.2	4.2	4.2	67.475	596	4	7	1.7402e-06	4.2	4.2
2150	1150;14630;18671	IPI00219025	NP_001112362;NP_002055	ENSG00000173221	GLRX	GLRX{glutaredoxin (thioltransferase) [Source:HGNC Symbol,Acc:4330]}	3	2	2	2	2	1	17	11.3	11.3	11.776	106	4	12	4.3434e-08	11.3	16
2160	498;10856	IPI00219153	NP_000974	ENSG00000116251	RPL22	RPL22{ribosomal protein L22 [Source:HGNC Symbol,Acc:10315]}	2	2	2	2	2	2	18.8	18.8	18.8	14.787	128	6	20	2.1745e-46	18.8	18.8
2163	377;11126	IPI00219160	NP_000986;NP_296374	ENSG00000109475	RPL34	RPL34{ribosomal protein L34 [Source:HGNC Symbol,Acc:10340]}	2	2	2	2	2	2	12.8	12.8	12.8	13.293	117	4	13	8.7157e-07	12.8	12.8
2167	1869;8382	IPI00926491	NP_001185808;NP_056360;NP_004880;NP_001003713;NP_001003714;NP_001034267	ENSG00000248919;ENSG00000241468;ENSG00000106246	ATP5J2-PTCD1;ATP5J2;PTCD1	ATP5J2-PTCD1{ATP5J2-PTCD1 readthrough [Source:HGNC Symbol,Acc:38844]};ATP5J2{ATP synthase, H+ transporting, mitochondrial Fo complex, subunit F2 [Source:HGNC Symbol,Acc:848]};PTCD1{pentatricopeptide repeat domain 1 [Source:HGNC Symbol,Acc:22198]}	2	2	2	2	2	2	3.2	3.2	3.2	84.109	749	45	54	3.6507e-59	3.2	3.2
2173	7982;16130	IPI00219383	NP_002482	ENSG00000119013	NDUFB3	NDUFB3{NADH dehydrogenase (ubiquinone) 1 beta subcomplex, 3, 12kDa [Source:HGNC Symbol,Acc:7698]}	2	2	2	2	2	2	21.4	21.4	21.4	11.402	98	4	5	3.9061e-08	21.4	21.4
2177	3248;5416	IPI00219436	NP_150596	ENSG00000166562	SEC11C	SEC11C{SEC11 homolog C (S. cerevisiae) [Source:HGNC Symbol,Acc:23400]}	2	2	1	2	1	2	9.4	9.4	9.4	21.542	192	8	15	2.3248e-20	5.2	9.4
2179	4917;7862	IPI00642374	NP_057068;NP_001186190;NP_001186191;NP_001186192	ENSG00000116750	UCHL5	UCHL5{ubiquitin carboxyl-terminal hydrolase L5 [Source:HGNC Symbol,Acc:19678]}	2	2	2	2	2	2	4.9	4.9	4.9	41.694	368	4	4	9.3155e-06	4.9	4.9
2183	2127;10289	IPI00260090	NP_001034548;NP_001193409;NP_001193411;NP_055615;NP_573403;NP_877496	ENSG00000062598;ENSG00000155849	ELMO2;ELMO1	ELMO2{engulfment and cell motility 2 [Source:HGNC Symbol,Acc:17233]};ELMO1{engulfment and cell motility 1 [Source:HGNC Symbol,Acc:16286]}	2	2	2	2	2	2	2.3	2.3	2.3	83.958	732	3	2	9.2005e-05	2.3	2.3
2186	2660;11939;14778;17624	IPI00219604	NP_002746	ENSG00000169032	MAP2K1	MAP2K1{mitogen-activated protein kinase kinase 1 [Source:HGNC Symbol,Acc:6840]}	4	2	2	3	1	2	11.2	11.2	5.9	43.439	393	3	10	2.4079e-16	5.3	8.9
2201	9331;13159	IPI00219841	NP_000225	ENSG00000105486	LIG1	LIG1{ligase I, DNA, ATP-dependent [Source:HGNC Symbol,Acc:6598]}	2	2	2	2	2	2	2.4	2.4	2.4	101.73	919	5	6	1.3172e-06	2.4	2.4
2202	8001;12123	IPI00219861	NP_004291	ENSG00000143727	ACP1	ACP1{acid phosphatase 1, soluble [Source:HGNC Symbol,Acc:122]}	2	2	1	2	1	2	15.2	15.2	15.2	18.042	158	2	7	5.6615e-08	8.2	15.2
2211	15279;19577	IPI00220070	NP_004558	ENSG00000114268	PFKFB4	PFKFB4{6-phosphofructo-2-kinase/fructose-2,6-biphosphatase 4 [Source:HGNC Symbol,Acc:8875]}	2	2	2	2	2	2	5.1	5.1	5.1	54.039	469	4	5	4.8656e-06	5.1	5.1
2212	11722;16757	IPI00395768	NP_004168;NP_001171511	ENSG00000166900	STX3	STX3{syntaxin 3 [Source:HGNC Symbol,Acc:11438]}	2	2	1	1	1	1	7.3	7.3	7.3	33.155	289	1	5	1.0941e-09	2.8	4.5
2222	6332;13272	IPI00303283	NP_000203	ENSG00000178852	C17orf57	C17orf57{chromosome 17 open reading frame 57 [Source:HGNC Symbol,Acc:26864]}	2	2	1	2	1	2	3.7	3.7	3.7	87.057	788	1	4	3.7437e-08	1.9	3.7
2235	3921;10988	IPI00220648	NP_006547	ENSG00000163344	PMVK	PMVK{phosphomevalonate kinase [Source:HGNC Symbol,Acc:9141]}	2	2	2	2	2	2	10.9	10.9	10.9	21.995	192	4	5	3.2675e-07	10.9	10.9
2241	5244;11725;17541	IPI00220739	NP_006658	ENSG00000101856	PGRMC1	PGRMC1{progesterone receptor membrane component 1 [Source:HGNC Symbol,Acc:16090]}	3	2	2	3	2	2	10.8	7.7	7.7	21.671	195	7	7	1.5677e-37	7.7	10.8
2245	5268;17021	IPI00220835	NP_006799	ENSG00000106803	SEC61B	SEC61B{Sec61 beta subunit [Source:HGNC Symbol,Acc:16993]}	2	2	1	2	1	2	21.9	21.9	21.9	9.9743	96	2	14	2.6558e-08	10.4	21.9
2262	1184;16637	IPI00221300	NP_001405	ENSG00000111361	EIF2B1	EIF2B1{eukaryotic translation initiation factor 2B, subunit 1 alpha, 26kDa [Source:HGNC Symbol,Acc:3257]}	2	2	2	2	2	2	6.9	6.9	6.9	33.712	305	3	5	2.6442e-18	6.9	6.9
2268	6636;19833	IPI00234857	NP_001071158;NP_001071160;NP_079016;NP_001071159	ENSG00000086848	ALG9	ALG9{asparagine-linked glycosylation 9, alpha-1,2-mannosyltransferase homolog (S. cerevisiae) [Source:HGNC Symbol,Acc:15672]}	2	2	2	2	2	2	3.3	3.3	3.3	95.952	844	5	6	1.3584e-07	3.3	3.3
2270	4522;11063	IPI00237884	NP_005091;NP_653080	ENSG00000131016	AKAP12	AKAP12{A kinase (PRKA) anchor protein 12 [Source:HGNC Symbol,Acc:370]}	2	2	2	1	2	1	1.4	1.4	1.4	191.48	1782	4	2	2.065e-10	1.4	0.6
2273	4504;14137	IPI00239815	NP_116219	ENSG00000141076	CIRH1A	CIRH1A{cirrhosis, autosomal recessive 1A (cirhin) [Source:HGNC Symbol,Acc:1983]}	2	2	2	2	2	2	2.9	2.9	2.9	76.889	686	10	12	5.9038e-14	2.9	2.9
2277	3621;14974	IPI00853043	NP_001091896	ENSG00000108604	SMARCD2	SMARCD2{SWI/SNF related, matrix associated, actin dependent regulator of chromatin, subfamily d, member 2 [Source:HGNC Symbol,Acc:11107]}	2	2	1	1	1	1	5.3	5.3	5.3	58.92	531	2	2	1.3312e-15	3.2	2.1
2283	4691;19131	IPI00247167	NP_001001414	ENSG00000188505	NCCRP1	NCCRP1{non-specific cytotoxic cell receptor protein 1 homolog (zebrafish) [Source:HGNC Symbol,Acc:33739]}	2	2	2	2	2	2	5.8	5.8	5.8	30.847	275	12	14	6.9708e-14	5.8	5.8
2289	916;18297	IPI00254338	NP_835227	ENSG00000141699	FAM134C	FAM134C{family with sequence similarity 134, member C [Source:HGNC Symbol,Acc:27258]}	2	2	2	1	2	1	7.1	7.1	7.1	51.396	466	5	2	1.4431e-20	7.1	3.9
2296	1470;18280	IPI00257882	NP_000276;NP_001159528;NP_001159529	ENSG00000124299	PEPD	PEPD{peptidase D [Source:HGNC Symbol,Acc:8840]}	2	2	2	2	2	2	5.5	5.5	5.5	54.548	493	13	21	3.1792e-19	5.5	5.5
2298	5689;5725	IPI00288941	NP_066018	ENSG00000124160	NCOA5	NCOA5{nuclear receptor coactivator 5 [Source:HGNC Symbol,Acc:15909]}	2	2	2	1	2	1	6	6	6	65.536	579	5	2	2.5408e-22	6	2.9
2309	5924;6222	IPI00289776	NP_055872	ENSG00000005810	MYCBP2	MYCBP2{MYC binding protein 2 [Source:HGNC Symbol,Acc:23386]}	2	2	1	2	1	2	0.4	0.4	0.4	513.63	4678	7	7	2.7384e-13	0.3	0.4
2327	716;12844	IPI00290979	NP_057090	ENSG00000011198	ABHD5	ABHD5{abhydrolase domain containing 5 [Source:HGNC Symbol,Acc:21396]}	2	2	2	2	2	2	8.6	8.6	8.6	39.095	349	8	13	3.4372e-21	8.6	8.6
2337	6634;14492;18816	IPI00291398	NP_071505;NP_071320	ENSG00000116001	TIA1	TIA1{TIA1 cytotoxic granule-associated RNA binding protein [Source:HGNC Symbol,Acc:11802]}	3	2	3	2	2	1	10.6	10.6	7.3	42.963	386	12	13	1.044e-70	10.6	6
2339	138;1831;3861;5286;5369;5882;6121;6128;6161;7337;9200;11730;13005;14239;14240;16268;19345	IPI00291467	NP_001627	ENSG00000169100	SLC25A6	SLC25A6{solute carrier family 25 (mitochondrial carrier, adenine nucleotide translocator), member 6 [Source:HGNC Symbol,Acc:10992]}	17	2	15	17	2	2	51.3	18.1	9.4	32.866	298	16	38	6.0704e-194	47.7	51.3
2345	12191;13843	IPI00291695	NP_001008398	ENSG00000164294	GPX8	GPX8{glutathione peroxidase 8 (putative) [Source:HGNC Symbol,Acc:33100]}	2	2	2	1	2	1	5.7	5.7	5.7	23.881	209	9	4	1.2602e-14	5.7	5.7
2346	10090;19342	IPI00291755	NP_079199	ENSG00000132182	NUP210	NUP210{nucleoporin 210kDa [Source:HGNC Symbol,Acc:30052]}	2	2	2	2	2	2	1.2	1.2	1.2	205.11	1887	4	7	7.6858e-28	1.2	1.2
2348	5088;19137	IPI00409590	NP_056667;NP_005349	ENSG00000136153	LMO7	LMO7{LIM domain 7 [Source:HGNC Symbol,Acc:6646]}	2	2	1	2	1	2	1.4	1.4	1.4	192.69	1683	1	2	9.9903e-15	0.5	1.4
2354	3610;15736	IPI00975549	NP_001182484;NP_001182485;NP_055481	ENSG00000113282	CLINT1	CLINT1{clathrin interactor 1 [Source:HGNC Symbol,Acc:23186]}	2	2	2	2	2	2	3.4	3.4	3.4	70.294	643	4	2	1.0527e-05	3.4	3.4
2358	11262;19355	IPI00292000	NP_056444	ENSG00000105618	PRPF31	PRPF31{PRP31 pre-mRNA processing factor 31 homolog (S. cerevisiae) [Source:HGNC Symbol,Acc:15446]}	2	2	1	2	1	2	3.6	3.6	3.6	55.455	499	6	8	1.0689e-06	2	3.6
2368	17505;17969	IPI00292567	NP_060209	ENSG00000085998	POMGNT1	POMGNT1{protein O-linked mannose beta1,2-N-acetylglucosaminyltransferase [Source:HGNC Symbol,Acc:19139]}	2	2	2	1	2	1	4.1	4.1	4.1	84.698	748	4	2	1.7787e-05	4.1	2.5
2371	832;17180	IPI00852987	NP_001107227;NP_001107228;NP_001944	ENSG00000025708	TYMP	TYMP{thymidine phosphorylase [Source:HGNC Symbol,Acc:3148]}	2	2	2	2	2	2	6	6	6	50.404	487	19	23	8.0963e-70	6	6
2378	8394;15663	IPI00293126	NP_001272	ENSG00000105254	TBCB	TBCB{tubulin folding cofactor B [Source:HGNC Symbol,Acc:1989]}	2	2	2	2	2	2	7	7	7	27.325	244	2	12	7.1419e-06	7	7
2379	6555;11141	IPI00783877	NP_001123497;NP_775949;NP_001123498	ENSG00000170379	FAM115C	FAM115C{family with sequence similarity 115, member C [Source:HGNC Symbol,Acc:26878]}	2	2	2	2	2	2	2.8	2.8	2.8	100.9	919	7	8	1.994e-246	2.8	2.8
2382	8790;13907	IPI00293276	NP_002406	ENSG00000240972	MIF	MIF{macrophage migration inhibitory factor (glycosylation-inhibiting factor) [Source:HGNC Symbol,Acc:7097]}	2	2	2	2	2	2	17.4	17.4	17.4	12.476	115	21	32	2.9997e-23	17.4	17.4
2383	2778;7102	IPI00293303	NP_001008530;NP_005597	ENSG00000100600	LGMN	LGMN{legumain [Source:HGNC Symbol,Acc:9472]}	2	2	2	2	2	2	7.2	7.2	7.2	49.411	433	9	16	1.7979e-146	7.2	7.2
2385	432;18365	IPI00908725	NP_653205	ENSG00000158545	ZC3H18	ZC3H18{zinc finger CCCH-type containing 18 [Source:HGNC Symbol,Acc:25091]}	2	2	1	2	1	2	2.9	2.9	2.9	108.98	977	1	6	1.3372e-08	1.3	2.9
2386	14897;17527	IPI00293320	NP_710157	ENSG00000185112	FAM43A	FAM43A{family with sequence similarity 43, member A [Source:HGNC Symbol,Acc:26888]}	2	2	2	2	2	2	4	4	4	45.775	423	6	6	0.00014054	4	4
2395	10852;11253	IPI00293590	NP_001003794;NP_009214	ENSG00000074416	MGLL	MGLL{monoglyceride lipase [Source:HGNC Symbol,Acc:17038]}	2	2	2	2	2	2	8	8	8	34.292	313	6	4	4.7838e-08	8	8
2410	7921;19609	IPI00294472	NP_057124	ENSG00000117500	TMED5	TMED5{transmembrane emp24 protein transport domain containing 5 [Source:HGNC Symbol,Acc:24251]}	2	2	2	2	2	2	10	10	10	26.005	229	7	15	3.181e-48	10	10
2411	1237;19545	IPI00294486	NP_001386	ENSG00000130829	DUSP9	DUSP9{dual specificity phosphatase 9 [Source:HGNC Symbol,Acc:3076]}	2	2	2	1	2	1	8.3	8.3	8.3	41.867	384	8	14	7.3608e-94	8.3	4.4
2412	1659;7674	IPI00294495	NP_057490	ENSG00000143222	UFC1	UFC1{ubiquitin-fold modifier conjugating enzyme 1 [Source:HGNC Symbol,Acc:26941]}	2	2	2	2	2	2	13.2	13.2	13.2	19.458	167	11	5	5.6732e-06	13.2	13.2
2413	9311;9532	IPI00294501	NP_001157289;NP_001351	ENSG00000172893	DHCR7	DHCR7{7-dehydrocholesterol reductase [Source:HGNC Symbol,Acc:2860]}	2	2	2	2	2	2	3.6	3.6	3.6	54.489	475	6	4	8.0509e-12	3.6	3.6
2417	6849;8921;13048	IPI00294653	NP_005119	ENSG00000142197	DOPEY2	DOPEY2{dopey family member 2 [Source:HGNC Symbol,Acc:1291]}	3	2	3	2	2	1	1	0.7	0.7	258.23	2298	2	1	1.3609e-05	1	0.6
2418	11205;19782	IPI00966357	NP_005500	ENSG00000172869	DMXL1	DMXL1{Dmx-like 1 [Source:HGNC Symbol,Acc:2937]}	2	2	2	2	2	2	0.5	0.5	0.5	340.27	3048	10	8	0.00024015	0.5	0.5
2423	5259;11044	IPI00294891	NP_001028886;NP_006161	ENSG00000111641	NOP2	NOP2{NOP2 nucleolar protein homolog (yeast) [Source:HGNC Symbol,Acc:7867]}	2	2	1	1	1	1	3.5	3.5	3.5	93.982	854	5	3	1.7863e-06	1.8	1.8
2425	9202;17929	IPI00294943	NP_005735	ENSG00000166233	ARIH1	ARIH1{ariadne homolog, ubiquitin-conjugating enzyme E2 binding protein, 1 (Drosophila) [Source:HGNC Symbol,Acc:689]}	2	2	2	2	2	2	3.9	3.9	3.9	64.117	557	6	4	1.4368e-11	3.9	3.9
2431	16496;18741	IPI00295240	NP_066923;NP_001185918	ENSG00000244005	NFS1	NFS1{NFS1 nitrogen fixation 1 homolog (S. cerevisiae) [Source:HGNC Symbol,Acc:15910]}	2	2	2	2	2	2	5.9	5.9	5.9	50.195	457	2	2	3.0445e-05	5.9	5.9
2435	711;19531	IPI00654731	NP_055129	ENSG00000107201	DDX58	DDX58{DEAD (Asp-Glu-Ala-Asp) box polypeptide 58 [Source:HGNC Symbol,Acc:19102]}	2	2	2	2	2	2	1.9	1.9	1.9	106.6	925	9	9	6.2371e-12	1.9	1.9
2447	5833;15434	IPI00296022	NP_001083060;NP_005995	ENSG00000173660	UQCRH	UQCRH{ubiquinol-cytochrome c reductase hinge protein [Source:HGNC Symbol,Acc:12590]}	2	2	1	2	1	2	27.5	27.5	27.5	10.739	91	1	3	1.6645e-50	19.8	27.5
2450	12822;18967	IPI00296165					2	2	2	1	2	1	3.8	3.8	3.8	80.118	705	5	3	1.6848e-06	3.8	1.7
2451	15754;18213	IPI00296190	NP_115709	ENSG00000122378	C10orf58	C10orf58{chromosome 10 open reading frame 58 [Source:HGNC Symbol,Acc:28651]}	2	2	2	0	2	0	11.4	11.4	11.4	25.764	229	7		5.2344e-11	11.4	0
2457	14872;14988	IPI00296374	NP_006773	ENSG00000162300	ZFPL1	ZFPL1{zinc finger protein-like 1 [Source:HGNC Symbol,Acc:12868]}	2	2	2	2	2	2	3.2	3.2	3.2	34.114	310	11	8	4.5389e-08	3.2	3.2
2462	1145;15617	IPI00296535	NP_036392	ENSG00000131373	HACL1	HACL1{2-hydroxyacyl-CoA lyase 1 [Source:HGNC Symbol,Acc:17856]}	2	2	1	2	1	2	4.8	4.8	4.8	63.728	578	3	5	3.1651e-31	3.3	4.8
2467	17119;18775	IPI00646762	NP_054861	ENSG00000165609	NUDT5	NUDT5{nudix (nucleoside diphosphate linked moiety X)-type motif 5 [Source:HGNC Symbol,Acc:8052]}	2	2	2	2	2	2	6.5	6.5	6.5	25.895	232	2	5	0.00015206	6.5	6.5
2469	13316;18902	IPI00296999	NP_663729	ENSG00000171953	ATPAF2	ATPAF2{ATP synthase mitochondrial F1 complex assembly factor 2 [Source:HGNC Symbol,Acc:18802]}	2	2	2	1	2	1	9.7	9.7	9.7	32.772	289	5	3	4.9004e-29	9.7	5.5
2472	4312;19377	IPI00305064	NP_000601;NP_001001389;NP_001001390;NP_001189484;NP_001001391;NP_001189486;NP_001189485	ENSG00000026508	CD44	CD44{CD44 molecule (Indian blood group) [Source:HGNC Symbol,Acc:1681]}	2	2	2	1	2	1	2.8	2.8	2.8	81.537	742	5	2	1.3675e-13	2.8	1.6
2476	11912;15669	IPI00297477	NP_003081	ENSG00000131876	SNRPA1	SNRPA1{small nuclear ribonucleoprotein polypeptide A' [Source:HGNC Symbol,Acc:11152]}	2	2	2	2	2	2	7.1	7.1	7.1	28.415	255	5	12	1.2157e-13	7.1	7.1
2481	1969;12258	IPI00297635	NP_005613	ENSG00000005187	ACSM3	ACSM3{acyl-CoA synthetase medium-chain family member 3 [Source:HGNC Symbol,Acc:10522]}	2	2	2	2	2	2	3.6	3.6	3.6	66.152	586	8	6	8.0254e-08	3.6	3.6
2486	8137;15954	IPI00298214	NP_004818	ENSG00000118777	ABCG2	ABCG2{ATP-binding cassette, sub-family G (WHITE), member 2 [Source:HGNC Symbol,Acc:74]}	2	2	1	1	1	1	3.4	3.4	3.4	72.313	655	6	3	1.9956e-07	1.8	1.5
2499	5952;10075	IPI00298731	NP_002705	ENSG00000204569;ENSG00000206489;ENSG00000227804;ENSG00000230995;ENSG00000231737;ENSG00000235291;ENSG00000238104	PPP1R10	PPP1R10{protein phosphatase 1, regulatory (inhibitor) subunit 10 [Source:HGNC Symbol,Acc:9284]}	2	2	1	1	1	1	2.8	2.8	2.8	99.057	940	1	2	1.1697e-05	1.1	1.7
2502	4990;10388;19949	IPI00298860	NP_001186078;NP_002334	ENSG00000012223	LTF	LTF{lactotransferrin [Source:HGNC Symbol,Acc:6720]}	3	2	1	3	1	2	4.6	4.6	3.4	78.367	711	1	7	5.6775e-23	1.8	4.6
2514	648;9443	IPI00299063	NP_003147	ENSG00000167323	STIM1	STIM1{stromal interaction molecule 1 [Source:HGNC Symbol,Acc:11386]}	2	2	2	2	2	2	3.4	3.4	3.4	77.422	685	7	5	1.745e-24	3.4	3.4
2515	749;10016	IPI00299084	NP_060596	ENSG00000109133	TMEM33	TMEM33{transmembrane protein 33 [Source:HGNC Symbol,Acc:25541]}	2	2	2	2	2	2	8.1	8.1	8.1	27.978	247	5	20	1.3251e-58	8.1	8.1
2518	16383;17231	IPI00299149	NP_008868;NP_001005849	ENSG00000228532;ENSG00000188612	RP1-241P17.4;SUMO2	RP1-241P17.4{};SUMO2{SMT3 suppressor of mif two 3 homolog 2 (S. cerevisiae) [Source:HGNC Symbol,Acc:11125]}	2	2	1	2	1	2	23.2	23.2	23.2	10.839	95	1	9	8.7313e-05	10.5	23.2
2525	15015;16865	IPI00299300	NP_000472;NP_001158184;NP_001158182	ENSG00000145020	AMT	AMT{aminomethyltransferase [Source:HGNC Symbol,Acc:473]}	2	2	2	1	2	1	3.5	3.5	3.5	43.946	403	2	1	1.2118e-09	3.5	3.2
2528	8419;19699	IPI00299417	NP_001002877;NP_001002878;NP_001002879;NP_003669	ENSG00000100296	THOC5	THOC5{THO complex 5 [Source:HGNC Symbol,Acc:19074]}	2	2	2	2	2	2	2.8	2.8	2.8	78.507	683	5	7	0.00050856	2.8	2.8
2530	8282;17872	IPI00299517	NP_115558	ENSG00000165660	FAM175B	FAM175B{family with sequence similarity 175, member B [Source:HGNC Symbol,Acc:28975]}	2	2	1	2	1	2	3.9	3.9	3.9	46.9	415	3	5	1.1393e-06	1.4	3.9
2531	4961;13332	IPI00299524	NP_055680	ENSG00000010292	NCAPD2	NCAPD2{non-SMC condensin I complex, subunit D2 [Source:HGNC Symbol,Acc:24305]}	2	2	2	1	2	1	1.7	1.7	1.7	157.18	1401	6	5	6.8537e-07	1.7	1.1
2536	5608;19222	IPI00299738	NP_002584	ENSG00000106333	PCOLCE	PCOLCE{procollagen C-endopeptidase enhancer [Source:HGNC Symbol,Acc:8738]}	2	2	1	2	1	2	5.6	5.6	5.6	47.972	449	4	10	3.2352e-10	2	5.6
2540	18790;19728	IPI00299977	NP_054891	ENSG00000054148	PHPT1	PHPT1{phosphohistidine phosphatase 1 [Source:HGNC Symbol,Acc:30033]}	2	2	1	2	1	2	19.2	19.2	19.2	13.832	125	3	9	1.6153e-27	8.8	19.2
2551	3545;9433	IPI00300341	NP_001191786;NP_001191787;NP_001191788;NP_001191789;NP_001191790;NP_001191791;NP_001191792;NP_001191793;NP_005639	ENSG00000154582	TCEB1	TCEB1{transcription elongation factor B (SIII), polypeptide 1 (15kDa, elongin C) [Source:HGNC Symbol,Acc:11617]}	2	2	2	2	2	2	18.8	18.8	18.8	12.473	112	3	9	6.7657e-06	18.8	18.8
2559	4754;7288	IPI00300971	NP_037471	ENSG00000088035	ALG6	ALG6{asparagine-linked glycosylation 6, alpha-1,3-glucosyltransferase homolog (S. cerevisiae) [Source:HGNC Symbol,Acc:23157]}	2	2	1	2	1	2	4.9	4.9	4.9	58.347	509	1	2	0.0002448	2.6	4.9
2575	7503;13555	IPI00328409	NP_060546	ENSG00000169126	ARMC4	ARMC4{armadillo repeat containing 4 [Source:HGNC Symbol,Acc:25583]}	2	2	1	2	1	2	1.2	1.2	1.2	115.68	1044	4	6	0.00073728	0.7	1.2
2581	3343;19312	IPI00872556	NP_060691;NP_775739	ENSG00000173542;ENSG00000114978	MOBKL1A;MOBKL1B	MOBKL1A{MOB1, Mps One Binder kinase activator-like 1A (yeast) [Source:HGNC Symbol,Acc:29801]};MOBKL1B{MOB1, Mps One Binder kinase activator-like 1B (yeast) [Source:HGNC Symbol,Acc:16015]}	2	2	1	2	1	2	10.4	10.4	10.4	25.499	221	1	6	9.0542e-10	5.4	10.4
2588	9152;9644	IPI00913889	NP_001129037;NP_036212;NP_001171606	ENSG00000130021	HDHD1	HDHD1{haloacid dehalogenase-like hydrolase domain containing 1 [Source:HGNC Symbol,Acc:16818]}	2	2	2	2	2	2	8.8	8.8	8.8	27.572	251	3	2	1.5392e-19	8.8	8.8
2589	4808;9707	IPI00855940	NP_055839	ENSG00000130227	XPO7	XPO7{exportin 7 [Source:HGNC Symbol,Acc:14108]}	2	2	2	2	2	2	1.7	1.7	1.7	124.84	1096	2	3	3.1265e-05	1.7	1.7
2592	7090;11337	IPI00973177	NP_996826;NP_000618;NP_001159736;NP_001159737	ENSG00000049323	LTBP1	LTBP1{latent transforming growth factor beta binding protein 1 [Source:HGNC Symbol,Acc:6714]}	2	2	2	2	2	2	1.4	1.4	1.4	186.87	1722	2	4	7.1831e-05	1.4	1.4
2593	2132;3646	IPI00302688	NP_001002030;NP_001099014;NP_001132982	ENSG00000093144	ECHDC1	ECHDC1{enoyl CoA hydratase domain containing 1 [Source:HGNC Symbol,Acc:21489]}	2	2	1	2	1	2	9.8	9.8	9.8	33.698	307	1	6	1.7042e-39	5.9	9.8
2606	1681;2486;13100;18162	IPI00303318	NP_057707	ENSG00000153310	FAM49B	FAM49B{family with sequence similarity 49, member B [Source:HGNC Symbol,Acc:25216]}	4	2	1	4	0	2	15.4	15.4	8.6	36.748	324	5	27	1.7407e-93	4	15.4
2612	3637;6258	IPI00303954	NP_085056	ENSG00000103018	CYB5B	CYB5B{cytochrome b5 type B (outer mitochondrial membrane) [Source:HGNC Symbol,Acc:24374]}	2	2	2	2	2	2	14	14	14	16.694	150	8	8	1.6895e-35	14	14
2614	4810;9045	IPI00304082	NP_057132	ENSG00000066583	ISOC1	ISOC1{isochorismatase domain containing 1 [Source:HGNC Symbol,Acc:24254]}	2	2	1	2	1	2	9.1	9.1	9.1	32.236	298	1	10	1.5061e-56	4.4	9.1
2615	5584;13462	IPI00304187	NP_060547	ENSG00000106344	RBM28	RBM28{RNA binding motif protein 28 [Source:HGNC Symbol,Acc:21863]}	2	2	2	1	2	1	2	2	2	85.737	759	3	5	0.00041477	2	1.1
2617	1106;5292	IPI00304232	NP_060726	ENSG00000138442	WDR12	WDR12{WD repeat domain 12 [Source:HGNC Symbol,Acc:14098]}	2	2	0	2	0	2	5.9	5.9	5.9	47.707	423		3	0.00018715	0	5.9
2626	7600;10868	IPI00304676	NP_085131	ENSG00000185085	INTS5	INTS5{integrator complex subunit 5 [Source:HGNC Symbol,Acc:29352]}	2	2	2	1	2	1	3	3	3	107.99	1019	3	1	4.1317e-06	3	1.7
2634	428;1175;1305;1702;4430;4536;7286;9019;9271;9346;10538;10761;11018;11019;11689;13182;13244;13689;15131;15607;16022;17015;17472;19644	IPI00304925	NP_005336;NP_005337	ENSG00000204388;ENSG00000204389;ENSG00000212866;ENSG00000224501;ENSG00000231555;ENSG00000232804;ENSG00000234475;ENSG00000235941;ENSG00000237724;ENSG00000215328	HSPA1A;HSPA1B	HSPA1A{heat shock 70kDa protein 1A [Source:HGNC Symbol,Acc:5232]};HSPA1B{heat shock 70kDa protein 1B [Source:HGNC Symbol,Acc:5233]}	24	2	24	23	2	2	39.9	32.9	3.6	70.051	641	74	150	0	39.9	36.3
2642	7455;10137	IPI00333419	NP_005886	ENSG00000090615	GOLGA3	GOLGA3{golgin A3 [Source:HGNC Symbol,Acc:4426]}	2	2	2	2	2	2	1.6	1.6	1.6	170.42	1530	3	3	1.4542e-56	1.6	1.6
2647	10245;13158	IPI00305374	NP_005122	ENSG00000079134	THOC1	THOC1{THO complex 1 [Source:HGNC Symbol,Acc:19070]}	2	2	1	1	1	1	3.5	3.5	3.5	75.665	657	1	2	5.5076e-09	2.4	1.1
2655	4955;8832	IPI00306017	NP_001129515;NP_110427	ENSG00000138614	C15orf44	C15orf44{chromosome 15 open reading frame 44 [Source:HGNC Symbol,Acc:25372]}	2	2	2	2	2	2	4.3	4.3	4.3	61.345	554	9	8	1.1103e-13	4.3	4.3
2657	3269;9625	IPI00306178	NP_060687;NP_001138497	ENSG00000088298	EDEM2	EDEM2{ER degradation enhancer, mannosidase alpha-like 2 [Source:HGNC Symbol,Acc:15877]}	2	2	2	2	2	2	5.4	5.4	5.4	64.752	578	2	3	2.8266e-21	5.4	5.4
2659	625;7570	IPI00306290	NP_009166	ENSG00000184575	XPOT	XPOT{exportin, tRNA (nuclear export receptor for tRNAs) [Source:HGNC Symbol,Acc:12826]}	2	2	1	2	1	2	2.4	2.4	2.4	109.96	962	2	3	5.9913e-06	0.9	2.4
2666	4532;18300	IPI00644671	NP_115825	ENSG00000154222	CC2D1B	CC2D1B{coiled-coil and C2 domain containing 1B [Source:HGNC Symbol,Acc:29386]}	2	2	2	1	2	1	3.6	3.6	3.6	94.223	858	3	1	4.1393e-05	3.6	2.4
2677	7987;8268;15192	IPI00307155	NP_004841	ENSG00000134318	ROCK2	ROCK2{Rho-associated, coiled-coil containing protein kinase 2 [Source:HGNC Symbol,Acc:10252]}	3	2	2	2	2	1	2.4	2.4	1.7	160.9	1388	2	3	1.5405e-09	1.7	1.4
2682	13107;13573	IPI00307572	NP_060945	ENSG00000134851	TMEM165	TMEM165{transmembrane protein 165 [Source:HGNC Symbol,Acc:30760]}	2	2	2	2	2	2	13.3	13.3	13.3	34.905	324	3	3	3.7005e-21	13.3	13.3
2690	5485;8373;9784;9947;14815;16876;17032;17958	IPI00328319	NP_001128728;NP_005601;NP_001128727	ENSG00000162521	RBBP4	RBBP4{retinoblastoma binding protein 4 [Source:HGNC Symbol,Acc:9887]}	8	2	5	8	1	2	19.5	9.2	9.2	47.655	425	1	4	7.2895e-55	12	19.5
2705	2871;5254	IPI00328987	NP_004044	ENSG00000112578	BYSL	BYSL{bystin-like [Source:HGNC Symbol,Acc:1157]}	2	2	2	2	2	2	3.9	3.9	3.9	49.601	437	10	8	5.0011e-05	3.9	3.9
2709	4394;9883;15309;19310	IPI00329141	NP_055733	ENSG00000131873	CHSY1	CHSY1{chondroitin sulfate synthase 1 [Source:HGNC Symbol,Acc:17198]}	4	2	3	4	2	2	3.5	3.5	2	91.783	802	6	13	6.0391e-06	2.7	3.5
2711	1425;6996	IPI00419226	NP_443083;NP_821074;NP_821075	ENSG00000133121	STARD13	STARD13{StAR-related lipid transfer (START) domain containing 13 [Source:HGNC Symbol,Acc:19164]}	2	2	2	2	2	2	2.2	2.2	2.2	124.97	1113	5	4	1.8053e-13	2.2	2.2
2720	8344;13697	IPI00329538	NP_002764	ENSG00000052344	PRSS8	PRSS8{protease, serine, 8 [Source:HGNC Symbol,Acc:9491]}	2	2	2	2	2	2	9.6	9.6	9.6	36.431	343	5	10	3.7883e-101	9.6	9.6
2729	996;7253	IPI00329650	NP_612142	ENSG00000163002	NUP35	NUP35{nucleoporin 35kDa [Source:HGNC Symbol,Acc:29797]}	2	2	2	2	2	2	6.4	6.4	6.4	34.773	326	3	2	2.0051e-06	6.4	6.4
2730	1079;1652;2150;6561;7132	IPI00329672	NP_004989	ENSG00000157483	MYO1E	MYO1E{myosin IE [Source:HGNC Symbol,Acc:7599]}	5	2	5	3	2	2	5.2	5.2	2.3	127.04	1109	11	5	2.7057e-34	5.2	3.1
2744	13509;14480	IPI00333215	NP_006747	ENSG00000187735	TCEA1	TCEA1{transcription elongation factor A (SII), 1 [Source:HGNC Symbol,Acc:11612]}	2	2	1	1	1	1	8.3	8.3	8.3	33.969	301	1	8	3.0637e-05	4	4.3
2746	4383;9418	IPI00394758	NP_001026976;NP_000373	ENSG00000072210	ALDH3A2	ALDH3A2{aldehyde dehydrogenase 3 family, member A2 [Source:HGNC Symbol,Acc:403]}	2	2	0	2	0	2	4.5	4.5	4.5	57.669	508		4	7.8552e-06	0	4.5
2747	2724;8468;18671	IPI00333763	NP_057501	ENSG00000182512	GLRX5	GLRX5{glutaredoxin 5 [Source:HGNC Symbol,Acc:20134]}	3	2	1	3	1	2	19.7	19.7	15.9	16.628	157	1	13	6.5592e-11	7	19.7
2751	8431;16866	IPI00470484	NP_001192230;NP_877953;NP_689616;NP_877950	ENSG00000164318	EGFLAM	EGFLAM{EGF-like, fibronectin type III and laminin G domains [Source:HGNC Symbol,Acc:26810]}	2	2	2	2	2	2	2.7	2.7	2.7	111.27	1017	6	4	9.4656e-22	2.7	2.7
2756	8420;10735	IPI00783374	NP_071347	ENSG00000164068	RNF123	RNF123{ring finger protein 123 [Source:HGNC Symbol,Acc:21148]}	2	2	2	1	2	1	1.2	1.2	1.2	148.96	1316	2	3	0.00025457	1.2	0.5
2759	5672;19410	IPI00336017	NP_064647	ENSG00000137486	ARRB1	ARRB1{arrestin, beta 1 [Source:HGNC Symbol,Acc:711]}	2	2	2	2	2	2	7.3	7.3	7.3	46.308	410	4	3	3.084e-12	7.3	7.3
2761	7411;15036	IPI00337385	NP_060362	ENSG00000196504	PRPF40A	PRPF40A{PRP40 pre-mRNA processing factor 40 homolog A (S. cerevisiae) [Source:HGNC Symbol,Acc:16463]}	2	2	1	2	1	2	2.3	2.3	2.3	108.8	957	2	4	7.8133e-08	1.4	2.3
2771	17036;19090	IPI00373869	NP_001136270;NP_777553	ENSG00000258315;ENSG00000161939	AC040977.1;C17orf49	AC040977.1{chromatin complexes subunit BAP18 isoform 1 [Source:RefSeq peptide,Acc:NP_001136270]};C17orf49{chromosome 17 open reading frame 49 [Source:HGNC Symbol,Acc:28737]}	2	2	1	2	1	2	8.3	8.3	8.3	19.961	192	2	6	5.5068e-06	5.2	8.3
2776	3568;15296	IPI00374563	NP_940978	ENSG00000188157	AGRN	AGRN{agrin [Source:HGNC Symbol,Acc:329]}	2	2	2	2	2	2	0.7	0.7	0.7	214.84	2045	7	11	0.0001251	0.7	0.7
2784	5536;12937	IPI01008793	NP_001191396;NP_001191397;NP_005667;NP_001191395;NP_690595	ENSG00000182872	RBM10	RBM10{RNA binding motif protein 10 [Source:HGNC Symbol,Acc:9896]}	2	2	1	2	1	2	2.3	2.3	2.3	110.36	995	3	6	4.5241e-15	1.5	2.3
2789	326;15453	IPI00376317	NP_055144	ENSG00000038358	EDC4	EDC4{enhancer of mRNA decapping 4 [Source:HGNC Symbol,Acc:17157]}	2	2	1	2	1	2	1.8	1.8	1.8	151.66	1401	2	3	1.8434e-05	0.7	1.8
2798	13467;16439	IPI00383046	NP_620164	ENSG00000164237	CMBL	CMBL{carboxymethylenebutenolidase homolog (Pseudomonas) [Source:HGNC Symbol,Acc:25090]}	2	2	2	2	2	2	8.2	8.2	8.2	28.048	245	6	7	0.00030956	8.2	8.2
2799	4763;19073	IPI00383163	NP_001032382;NP_054893;NP_954995	ENSG00000151500	THYN1	THYN1{thymocyte nuclear protein 1 [Source:HGNC Symbol,Acc:29560]}	2	2	2	2	2	2	8	8	8	25.697	225	2	4	1.3742e-05	8	8
2808	3619;9229	IPI00549330		ENSG00000224041;ENSG00000244437	IGKV3-15;IGKV3D-15	IGKV3-15{immunoglobulin kappa variable 3-15 [Source:HGNC Symbol,Acc:5816]};IGKV3D-15{immunoglobulin kappa variable 3D-15 (gene/pseudogene) [Source:HGNC Symbol,Acc:5824]}	2	2	2	2	2	2	17.9	17.9	17.9	16.593	151	3	9	1.4628e-64	17.9	17.9
2809	4747;8992	IPI00384670	NP_001166159;NP_001166158;NP_037497;NP_001001560	ENSG00000100083	GGA1	GGA1{golgi-associated, gamma adaptin ear containing, ARF binding protein 1 [Source:HGNC Symbol,Acc:17842]}	2	2	2	1	2	1	2.1	2.1	2.1	72.277	656	3	4	0.00063676	2.1	1.1
2812	973;6346	IPI00880178	NP_996261;NP_778233	ENSG00000161671	C19orf63	C19orf63{chromosome 19 open reading frame 63 [Source:HGNC Symbol,Acc:27609]}	2	2	0	2	0	2	9.3	9.3	9.3	28.003	269		8	8.3673e-10	0	9.3
2816	13735;19917	IPI00385042	NP_036473	ENSG00000107937	GTPBP4	GTPBP4{GTP binding protein 4 [Source:HGNC Symbol,Acc:21535]}	2	2	1	2	1	2	3.9	3.9	3.9	73.964	634	4	3	3.4724e-27	2.4	3.9
2819	13960;19920	IPI00964165	NP_149977	ENSG00000100258	LMF2	LMF2{lipase maturation factor 2 [Source:HGNC Symbol,Acc:25096]}	2	2	2	2	2	2	4.2	4.2	4.2	78.61	714	20	18	5.212e-48	4.2	4.2
2821	12955;19066	IPI00385987	NP_631918;NP_001136408	ENSG00000164535	DAGLB	DAGLB{diacylglycerol lipase, beta [Source:HGNC Symbol,Acc:28923]}	2	2	2	2	2	2	3.1	3.1	3.1	73.731	672	4	3	5.4518e-05	3.1	3.1
2824	9235;13846	IPI00943265		ENSG00000211598	IGKV4-1	IGKV4-1{immunoglobulin kappa variable 4-1 [Source:HGNC Symbol,Acc:5834]}	2	2	2	2	2	2	13.3	13.3	13.3	19.518	180	5	7	6.4668e-19	13.3	13.3
2825	3812;11588	IPI00400812	NP_001123917;NP_006742	ENSG00000138434	SSFA2	SSFA2{sperm specific antigen 2 [Source:HGNC Symbol,Acc:11319]}	2	2	1	2	1	2	1.8	1.8	1.8	138.38	1259	3	7	0.00039519	1	1.8
2827	2103;5950;7530;12131;19282	IPI00386271	NP_003696	ENSG00000115840	SLC25A12	SLC25A12{solute carrier family 25 (mitochondrial carrier, Aralar), member 12 [Source:HGNC Symbol,Acc:10982]}	5	2	4	5	1	2	8.7	4	4	74.761	678	1	5	6.0855e-31	6	8.7
2829	2365;3516	IPI00785113	NP_001131024;NP_001131022	ENSG00000124831	LRRFIP1	LRRFIP1{leucine rich repeat (in FLII) interacting protein 1 [Source:HGNC Symbol,Acc:6702]}	2	2	2	1	2	1	2.8	2.8	2.8	89.252	808	4	2	3.3238e-52	2.8	1.1
2835	41;7182	IPI00394788	NP_065796	ENSG00000124608	AARS2	AARS2{alanyl-tRNA synthetase 2, mitochondrial (putative) [Source:HGNC Symbol,Acc:21022]}	2	2	1	2	1	2	2	2	2	107.34	985	6	5	3.0246e-37	1.2	2
2838	2382;4603	IPI00789490	NP_001236;NP_942142;NP_001171018;NP_001171019;NP_001171020;NP_942143	ENSG00000105492	SIGLEC6	SIGLEC6{sialic acid binding Ig-like lectin 6 [Source:HGNC Symbol,Acc:10875]}	2	2	2	2	2	2	3.5	3.5	3.5	49.912	453	18	24	2.1717e-05	3.5	3.5
2840	8622;12007	IPI00395558	NP_203755	ENSG00000148841	ITPRIP	ITPRIP{inositol 1,4,5-trisphosphate receptor interacting protein [Source:HGNC Symbol,Acc:29370]}	2	2	2	1	2	1	1.8	1.8	1.8	62.059	547	8	1	1.9252e-10	1.8	1.8
2842	1239;7631	IPI00872398	NP_036602;NP_001177957	ENSG00000064419	TNPO3	TNPO3{transportin 3 [Source:HGNC Symbol,Acc:17103]}	2	2	2	1	2	1	1.7	1.7	1.7	108.92	967	4	4	0.00013945	1.7	1
2847	8021;16195	IPI00396131	NP_060268	ENSG00000149658	YTHDF1	YTHDF1{YTH domain family, member 1 [Source:HGNC Symbol,Acc:15867]}	2	2	0	2	0	2	3.7	3.7	3.7	64.521	588		7	2.0139e-06	0	3.7
2853	3170;9397	IPI00396383	NP_073745	ENSG00000179403	VWA1	VWA1{von Willebrand factor A domain containing 1 [Source:HGNC Symbol,Acc:30910]}	2	2	1	2	1	2	5.8	5.8	5.8	46.804	445	4	8	7.5073e-11	1.8	5.8
2859	9436;17678	IPI00396627	NP_060597;NP_776065;NP_001159434	ENSG00000006744	ELAC2	ELAC2{elaC homolog 2 (E. coli) [Source:HGNC Symbol,Acc:14198]}	2	2	2	2	2	2	1.9	1.9	1.9	92.218	826	3	4	0.00022692	1.9	1.9
2865	846;19106	IPI00398020	NP_001073946	ENSG00000218336	ODZ3	ODZ3{odz, odd Oz/ten-m homolog 3 (Drosophila) [Source:HGNC Symbol,Acc:29944]}	2	2	2	2	2	2	0.8	0.8	0.8	300.95	2699	4	6	3.8862e-05	0.8	0.8
2867	6928;9120	IPI00398786	NP_001180245	ENSG00000151445	VIPAR	VIPAR{VPS33B interacting protein, apical-basolateral polarity regulator [Source:HGNC Symbol,Acc:20347]}	2	2	2	2	2	2	2.9	2.9	2.9	55.615	480	7	8	0.00016363	2.9	2.9
2868	2583;3830;3832;5976;6239;13692;16050;17010;18662	IPI00399007		ENSG00000211893	IGHG2	IGHG2{immunoglobulin heavy constant gamma 2 (G2m marker) [Source:HGNC Symbol,Acc:5526]}	9	2	8	9	2	2	24	13.2	6	46.06	417	12	33	1.6877e-148	20.1	24
2882	7562;19155	IPI00410091	NP_057485	ENSG00000149196	C11orf73	C11orf73{chromosome 11 open reading frame 73 [Source:HGNC Symbol,Acc:26938]}	2	2	2	2	2	2	8.1	8.1	8.1	21.627	197	3	4	1.3216e-05	8.1	8.1
2883	9365;10667	IPI00410215	NP_006076	ENSG00000162813	BPNT1	BPNT1{3'(2'), 5'-bisphosphate nucleotidase 1 [Source:HGNC Symbol,Acc:1096]}	2	2	0	2	0	2	6.5	6.5	6.5	35.744	325		4	3.0362e-05	0	6.5
2888	16101;16426	IPI00410657	NP_003790	ENSG00000101654	RNMT	RNMT{RNA (guanine-7-) methyltransferase [Source:HGNC Symbol,Acc:10075]}	2	2	2	2	2	2	3.8	3.8	3.8	57.724	504	4	5	5.5105e-10	3.8	3.8
2900	3046;8197	IPI00411886	NP_056473	ENSG00000188976	NOC2L	NOC2L{nucleolar complex associated 2 homolog (S. cerevisiae) [Source:HGNC Symbol,Acc:24517]}	2	2	2	2	2	2	3.2	3.2	3.2	84.918	749	9	11	3.4126e-20	3.2	3.2
2903	9300;9405	IPI00412147	NP_005085	ENSG00000167114	SLC27A4	SLC27A4{solute carrier family 27 (fatty acid transporter), member 4 [Source:HGNC Symbol,Acc:10998]}	2	2	2	2	2	2	2.5	2.5	2.5	72.063	643	22	21	1.3628e-12	2.5	2.5
2904	7994;16574	IPI00465428	NP_065872;NP_060154;NP_060550;NP_001018098	ENSG00000129003	VPS13C	VPS13C{vacuolar protein sorting 13 homolog C (S. cerevisiae) [Source:HGNC Symbol,Acc:23594]}	2	2	2	1	2	1	0.6	0.6	0.6	422.39	3753	6	3	3.034e-05	0.6	0.3
2905	7606;9124	IPI00412224	NP_060587	ENSG00000120008	WDR11	WDR11{WD repeat domain 11 [Source:HGNC Symbol,Acc:13831]}	2	2	2	1	2	1	1.6	1.6	1.6	136.68	1224	5	2	6.7563e-11	1.6	0.7
2907	45;397	IPI00952992	NP_660202	ENSG00000147813	NAPRT1	NAPRT1{nicotinate phosphoribosyltransferase domain containing 1 [Source:HGNC Symbol,Acc:30450]}	2	2	2	2	2	2	4.3	4.3	4.3	62.171	584	13	13	6.0154e-41	4.3	4.3
2914	1035;12876	IPI00639957	NP_954592	ENSG00000142453	CARM1	CARM1{coactivator-associated arginine methyltransferase 1 [Source:HGNC Symbol,Acc:23393]}	2	2	2	2	2	2	4.4	4.4	4.4	65.853	608	9	8	2.7721e-29	4.4	4.4
2917	7272;11425	IPI00921961	NP_001186109;NP_001186110;NP_001186112;NP_001001487	ENSG00000017260	ATP2C1	ATP2C1{ATPase, Ca++ transporting, type 2C, member 1 [Source:HGNC Symbol,Acc:13211]}	2	2	2	2	2	2	1.8	1.8	1.8	107.14	973	2	4	3.9747e-05	1.8	1.8
2922	11582;12390;12971;14282;19199	IPI00413344	NP_068733;NP_619579	ENSG00000165410	CFL2	CFL2{cofilin 2 (muscle) [Source:HGNC Symbol,Acc:1875]}	5	2	3	5	0	2	38.6	17.5	17.5	18.736	166		8	1.1047e-53	21.1	38.6
2923	4944;15415	IPI00413362	NP_056371	ENSG00000197555	SIPA1L1	SIPA1L1{signal-induced proliferation-associated 1 like 1 [Source:HGNC Symbol,Acc:20284]}	2	2	2	2	2	2	1.1	1.1	1.1	200.03	1804	7	5	0.00034531	1.1	1.1
2927	8212;11208	IPI00549564	NP_001070020;NP_061147	ENSG00000131069	ACSS2	ACSS2{acyl-CoA synthetase short-chain family member 2 [Source:HGNC Symbol,Acc:15814]}	2	2	2	2	2	2	2	2	2	80.087	714	4	5	0.00016702	2	2
2930	4480;13461	IPI01011193	NP_005598;NP_722560;NP_001186578	ENSG00000169398	PTK2	PTK2{PTK2 protein tyrosine kinase 2 [Source:HGNC Symbol,Acc:9611]}	2	2	2	2	2	2	1.8	1.8	1.8	124.08	1096	7	12	2.498e-10	1.8	1.8
2931	5922;17971	IPI00414008	NP_036266	ENSG00000163431	LMOD1	LMOD1{leiomodin 1 (smooth muscle) [Source:HGNC Symbol,Acc:6647]}	2	2	2	1	2	1	2.3	2.3	2.3	67.029	600	9	6	0.00079677	2.3	1.2
2934	1002;8947	IPI00873904	NP_064522;NP_997555	ENSG00000068400	GRIPAP1	GRIPAP1{GRIP1 associated protein 1 [Source:HGNC Symbol,Acc:18706]}	2	2	1	1	1	1	3.1	3.1	3.1	95.988	841	1	1	7.5237e-06	1.7	1.4
2940	2570;7496	IPI00414858	NP_001191405;NP_113619	ENSG00000136152	COG3	COG3{component of oligomeric golgi complex 3 [Source:HGNC Symbol,Acc:18619]}	2	2	2	1	2	1	2.1	2.1	2.1	94.095	828	4	1	0.00048013	2.1	0.7
2941	11954;17655	IPI00414860	NP_000989	ENSG00000197756	RPL37A	RPL37A{ribosomal protein L37a [Source:HGNC Symbol,Acc:10348]}	2	2	2	2	2	2	16.3	16.3	16.3	10.275	92	2	12	0.00068682	16.3	16.3
2944	827;2583;3830;3832;6239;12221;13692;16051;16857;18661;19170	IPI00973474		ENSG00000211897	IGHG3	IGHG3{immunoglobulin heavy constant gamma 3 (G3m marker) [Source:HGNC Symbol,Acc:5527]}	11	2	9	10	1	2	22	8.3	4.6	56.813	519	7	23	4.8912e-117	18.3	18.9
2948	4583;5619	IPI00418316	NP_898868;NP_898869;NP_036540	ENSG00000101040	ZMYND8	ZMYND8{zinc finger, MYND-type containing 8 [Source:HGNC Symbol,Acc:9397]}	2	2	2	1	2	1	1.5	1.5	1.5	138.12	1241	7	3	8.748e-06	1.5	0.8
2949	8997;17758	IPI00792312	NP_075391	ENSG00000143624;ENSG00000256921	AL513523.4;INTS3	AL513523.4{Integrator complex subunit 3 [Source:UniProtKB/Swiss-Prot,Acc:Q68E01]};INTS3{integrator complex subunit 3 [Source:HGNC Symbol,Acc:26153]}	2	2	1	2	1	2	1.9	1.9	1.9	118.07	1043	1	6	1.1789e-11	0.7	1.9
2952	12146;14963	IPI00418676	NP_079232	ENSG00000137842	TMEM62	TMEM62{transmembrane protein 62 [Source:HGNC Symbol,Acc:26269]}	2	2	2	2	2	2	3.3	3.3	3.3	73.132	643	5	8	1.4394e-08	3.3	3.3
2962	1805;12833	IPI00419531	NP_059133	ENSG00000165934	CPSF2	CPSF2{cleavage and polyadenylation specific factor 2, 100kDa [Source:HGNC Symbol,Acc:2325]}	2	2	2	1	2	1	3.3	3.3	3.3	88.486	782	7	3	1.3318e-23	3.3	1.7
2972	7500;16039;16095	IPI00419979	NP_002568	ENSG00000180370	PAK2	PAK2{p21 protein (Cdc42/Rac)-activated kinase 2 [Source:HGNC Symbol,Acc:8591]}	3	2	2	3	1	2	10.1	10.1	6.9	58.075	525	6	11	7.664e-65	6.3	10.1
2974	714;15485	IPI00420065	NP_115545	ENSG00000240303	ACAD11	ACAD11{acyl-CoA dehydrogenase family, member 11 [Source:HGNC Symbol,Acc:30211]}	2	2	2	2	2	2	3.6	3.6	3.6	87.282	780	4	6	2.4574e-17	3.6	3.6
2977	15278;18107	IPI00423568	NP_203524;NP_004976	ENSG00000133703	KRAS	KRAS{v-Ki-ras2 Kirsten rat sarcoma viral oncogene homolog [Source:HGNC Symbol,Acc:6407]}	2	2	1	2	1	2	12.7	12.7	12.7	21.656	189	2	4	1.5734e-08	4.8	12.7
2978	4973;9918	IPI00423874	NP_001135	ENSG00000159461	AMFR	AMFR{autocrine motility factor receptor [Source:HGNC Symbol,Acc:463]}	2	2	2	2	2	2	3.3	3.3	3.3	72.995	643	13	12	2.7151e-06	3.3	3.3
2981	4245;10641	IPI00427501	NP_115873;NP_001136094;NP_001136095	ENSG00000167925	GHDC	GHDC{GH3 domain containing [Source:HGNC Symbol,Acc:24438]}	2	2	2	2	2	2	3.6	3.6	3.6	57.522	530	7	5	1.2153e-05	3.6	3.6
2982	3533;9085;12001;15490	IPI00427739	NP_060684	ENSG00000137269	LRRC1	LRRC1{leucine rich repeat containing 1 [Source:HGNC Symbol,Acc:14307]}	4	2	4	4	2	2	9	9	4.4	59.241	524	18	17	2.6485e-61	9	9
2988	2503;8802;15512	IPI00432753	NP_001078816	ENSG00000160404	TOR2A	TOR2A{torsin family 2, member A [Source:HGNC Symbol,Acc:11996]}	3	2	3	2	2	1	12.1	9	9	35.714	321	8	2	1.3673e-43	12.1	8.1
2989	5923;6830	IPI00654813		ENSG00000125434	SLC25A35	SLC25A35{solute carrier family 25, member 35 [Source:HGNC Symbol,Acc:31921]}	2	2	2	2	2	2	6.3	6.3	6.3	32.437	300	13	13	2.019e-08	6.3	6.3
2991	16199;16803	IPI00435932	NP_001004434	ENSG00000158014	SLC30A2	SLC30A2{solute carrier family 30 (zinc transporter), member 2 [Source:HGNC Symbol,Acc:11013]}	2	2	2	2	2	2	7	7	7	40.563	372	7	8	1.4411e-40	7	7
2995	5847;6727	IPI00442073	NP_001180499;NP_001180500;NP_001180501;NP_004069	ENSG00000159176	CSRP1	CSRP1{cysteine and glycine-rich protein 1 [Source:HGNC Symbol,Acc:2469]}	2	2	1	1	1	1	17.6	17.6	17.6	20.567	193	3	4	4.8593e-17	8.8	8.8
3005	16487;18538	IPI00449909	NP_001106983;NP_663788;NP_001106984;NP_001106985;NP_003890	ENSG00000102606	ARHGEF7	ARHGEF7{Rho guanine nucleotide exchange factor (GEF) 7 [Source:HGNC Symbol,Acc:15607]}	2	2	2	1	2	1	2.5	2.5	2.5	90.011	803	3	2	0.00080394	2.5	1.2
3006	10105;18862	IPI00452731	NP_004992	ENSG00000167774	NDUFA7	NDUFA7{NADH dehydrogenase (ubiquinone) 1 alpha subcomplex, 7, 14.5kDa [Source:HGNC Symbol,Acc:7691]}	2	2	0	2	0	2	15.9	15.9	15.9	12.551	113		8	0.00013093	0	15.9
3009	13382;18991	IPI00454910	NP_059995	ENSG00000171219	CDC42BPG	CDC42BPG{CDC42 binding protein kinase gamma (DMPK-like) [Source:HGNC Symbol,Acc:29829]}	2	2	2	2	2	2	1.4	1.4	1.4	172.46	1551	4	3	1.4307e-05	1.4	1.4
3013	4441;7501	IPI00456363	NP_680780;NP_009176;NP_663760;NP_680782;NP_680781	ENSG00000168488	ATXN2L	ATXN2L{ataxin 2-like [Source:HGNC Symbol,Acc:31326]}	2	2	1	2	1	2	2.2	2.2	2.2	115.58	1097	4	8	2.3131e-10	0.9	2.2
3019	10663;18423	IPI00792422	NP_001005751;NP_056077;NP_001162577;NP_060702;NP_001162578	ENSG00000099290;ENSG00000172661;ENSG00000152726	FAM21A;FAM21C;FAM21B	FAM21A{family with sequence similarity 21, member A [Source:HGNC Symbol,Acc:23416]};FAM21C{family with sequence similarity 21, member C [Source:HGNC Symbol,Acc:23414]};FAM21B{family with sequence similarity 21, member B [Source:HGNC Symbol,Acc:23417]}	2	2	0	2	0	2	2.6	2.6	2.6	147.18	1341		4	3.0204e-13	0	2.6
3022	799;16592	IPI00464952	NP_004759;NP_001177916	ENSG00000116754	SRSF11	SRSF11{serine/arginine-rich splicing factor 11 [Source:HGNC Symbol,Acc:10782]}	2	2	1	2	1	2	5.2	5.2	5.2	53.542	484	9	23	4.0111e-16	1.7	5.2
3028	10965;19182	IPI00465054	NP_060206	ENSG00000066654	THUMPD1	THUMPD1{THUMP domain containing 1 [Source:HGNC Symbol,Acc:23807]}	2	2	2	2	2	2	5	5	5	48.548	439	11	7	5.0929e-20	5	5
3034	1289;19691	IPI00465160	NP_060828	ENSG00000161204	ABCF3	ABCF3{ATP-binding cassette, sub-family F (GCN20), member 3 [Source:HGNC Symbol,Acc:72]}	2	2	1	2	1	2	3.5	3.5	3.5	79.744	709	1	4	0.00051088	1.7	3.5
3038	3426;18778	IPI00465226	NP_689947	ENSG00000198663	C6orf89	C6orf89{chromosome 6 open reading frame 89 [Source:HGNC Symbol,Acc:21114]}	2	2	2	2	2	2	5.4	5.4	5.4	40.734	354	7	6	0.00067331	5.4	5.4
3064	11043;16791	IPI00941700	NP_055952	ENSG00000132294	EFR3A	EFR3A{EFR3 homolog A (S. cerevisiae) [Source:HGNC Symbol,Acc:28970]}	2	2	2	2	2	2	3	3	3	92.94	821	5	10	8.0969e-18	3	3
3065	14885;19181	IPI00470779	NP_787048	ENSG00000084652	TXLNA	TXLNA{taxilin alpha [Source:HGNC Symbol,Acc:30685]}	2	2	1	2	1	2	4.2	4.2	4.2	61.89	546	1	4	0.00084383	1.6	4.2
3070	147;4597	IPI00902969	NP_005253	ENSG00000127554	GFER	GFER{growth factor, augmenter of liver regeneration [Source:HGNC Symbol,Acc:4236]}	2	2	2	1	2	1	14.6	14.6	14.6	23.449	205	13	3	4.8015e-08	14.6	6.8
3074	6798;8331;12971	IPI00473014	NP_001011546;NP_006861	ENSG00000125868	DSTN	DSTN{destrin (actin depolymerizing factor) [Source:HGNC Symbol,Acc:15750]}	3	2	3	3	2	2	13.3	9.1	9.1	18.506	165	3	4	8.1105e-09	13.3	13.3
3075	5344;12698	IPI00953391	NP_001035545	ENSG00000149577	SIDT2	SIDT2{SID1 transmembrane family, member 2 [Source:HGNC Symbol,Acc:24272]}	2	2	2	2	2	2	1.9	1.9	1.9	96.728	855	2	5	0.00010923	1.9	1.9
3086	14263;15024	IPI00844406	NP_060481	ENSG00000134884	ARGLU1	ARGLU1{arginine and glutamate rich 1 [Source:HGNC Symbol,Acc:25482]}	2	2	1	2	1	2	5.9	5.9	5.9	32.885	273	1	5	1.2228e-05	2.9	5.9
3103	5110;9863	IPI00480103	NP_112181	ENSG00000101447	FAM83D	FAM83D{family with sequence similarity 83, member D [Source:HGNC Symbol,Acc:16122]}	2	2	2	1	2	1	2.9	2.9	2.9	67.664	615	6	2	3.0239e-05	2.9	1.6
3105	9628;10598	IPI00844377	NP_006720;NP_009293	ENSG00000147202	DIAPH2	DIAPH2{diaphanous homolog 2 (Drosophila) [Source:HGNC Symbol,Acc:2877]}	2	2	1	2	1	2	1.7	1.7	1.7	125.48	1103	2	7	1.0311e-07	0.6	1.7
3107	6249;11641	IPI00910275	NP_005549	ENSG00000159166	LAD1	LAD1{ladinin 1 [Source:HGNC Symbol,Acc:6472]}	2	2	1	2	1	2	5.3	5.3	5.3	58.677	531	2	4	2.2983e-50	3.4	5.3
3125	125;6845	IPI00911064	NP_057041	ENSG00000149089	APIP	APIP{APAF1 interacting protein [Source:HGNC Symbol,Acc:17581]}	2	2	2	2	2	2	9.3	9.3	9.3	29.255	259	4	10	2.0505e-21	9.3	9.3
3127	13925;17123	IPI00549869	NP_113609	ENSG00000258340	TTC25	TTC25{tetratricopeptide repeat domain 25 [Source:HGNC Symbol,Acc:25280]}	2	2	2	2	2	2	2.8	2.8	2.8	76.654	672	23	25	0.00044175	2.8	2.8
3128	27;28	IPI00550020	NP_002815	ENSG00000159335	PTMS	PTMS{parathymosin [Source:HGNC Symbol,Acc:9629]}	2	2	2	2	2	2	11.8	11.8	11.8	11.53	102	3	9	1.0302e-12	11.8	11.8
3130	3333;18787	IPI00550069	NP_002930;NP_976317;NP_976318;NP_976319;NP_976320;NP_976321;NP_976322;NP_976323	ENSG00000023191	RNH1	RNH1{ribonuclease/angiogenin inhibitor 1 [Source:HGNC Symbol,Acc:10074]}	2	2	2	2	2	2	5	5	5	49.973	461	3	3	4.676e-58	5	5
3137	7814;18980	IPI00550382	NP_001071642;NP_001071643;NP_001071644;NP_001071645;NP_004946	ENSG00000112759	SLC29A1	SLC29A1{solute carrier family 29 (nucleoside transporters), member 1 [Source:HGNC Symbol,Acc:11003]}	2	2	2	1	2	1	4.7	4.7	4.7	58.962	535	5	4	5.7084e-05	4.7	1.7
3144	2136;8923	IPI00915356	NP_001129512;NP_079087;NP_001136037	ENSG00000149532	CPSF7	CPSF7{cleavage and polyadenylation specific factor 7, 59kDa [Source:HGNC Symbol,Acc:30098]}	2	2	1	2	1	2	4.7	4.7	4.7	56.374	514	2	8	8.3194e-13	3.1	4.7
3146	8979;17642	IPI00914016	NP_001129115;NP_001129116;NP_057305	ENSG00000132912	DCTN4	DCTN4{dynactin 4 (p62) [Source:HGNC Symbol,Acc:15518]}	2	2	1	2	1	2	3.6	3.6	3.6	53.151	467	1	7	2.7506e-07	2.4	3.6
3149	847;15826	IPI00551024	NP_056348	ENSG00000149476	DAK	DAK{dihydroxyacetone kinase 2 homolog (S. cerevisiae) [Source:HGNC Symbol,Acc:24552]}	2	2	0	2	0	2	3.3	3.3	3.3	58.946	575		7	4.7705e-05	0	3.3
3152	4806;12171	IPI00744115	NP_000273;NP_001121164;NP_001171475	ENSG00000175198	PCCA	PCCA{propionyl CoA carboxylase, alpha polypeptide [Source:HGNC Symbol,Acc:8653]}	2	2	2	2	2	2	3	3	3	80.058	728	3	3	8.3794e-05	3	3
3166	6421;7351	IPI00855856	NP_001136402;NP_006586	ENSG00000166181	API5	API5{apoptosis inhibitor 5 [Source:HGNC Symbol,Acc:594]}	2	2	1	1	1	1	5	5	5	59.004	524	1	1	9.5894e-15	3.4	1.5
3169	223;3647	IPI00554777	NP_001171546;NP_001171547;NP_001171548;NP_001664;NP_597680;NP_899199	ENSG00000070669	ASNS	ASNS{asparagine synthetase (glutamine-hydrolyzing) [Source:HGNC Symbol,Acc:753]}	2	2	2	2	2	2	3.6	3.6	3.6	64.369	561	5	5	3.0851e-13	3.6	3.6
3174	5650;12653	IPI00983078	NP_006396;NP_001014842	ENSG00000254692;ENSG00000100926	RP11-468E2.1;TM9SF1	RP11-468E2.1{transmembrane 9 superfamily member 1 isoform a [Source:RefSeq peptide,Acc:NP_006396]};TM9SF1{transmembrane 9 superfamily member 1 [Source:HGNC Symbol,Acc:11864]}	2	2	2	2	2	2	3.2	3.2	3.2	92.386	815	4	7	3.6849e-05	3.2	3.2
3182	12351;17065	IPI00604599	NP_031390	ENSG00000166557	TMED3	TMED3{transmembrane emp24 protein transport domain containing 3 [Source:HGNC Symbol,Acc:28889]}	2	2	2	2	2	2	8.8	8.8	8.8	24.777	217	2	2	2.1355e-09	8.8	8.8
3184	815;16366	IPI00604624	NP_001129511;NP_001135827;NP_068596	ENSG00000196290	NIF3L1	NIF3L1{NIF3 NGG1 interacting factor 3-like 1 (S. pombe) [Source:HGNC Symbol,Acc:13390]}	2	2	2	1	2	1	7.7	7.7	7.7	41.968	377	4	2	2.4292e-06	7.7	4.8
3187	494;11384	IPI00940180	NP_631898	ENSG00000142002	DPP9	DPP9{dipeptidyl-peptidase 9 [Source:HGNC Symbol,Acc:18648]}	2	2	2	2	2	2	2.6	2.6	2.6	110.24	971	4	4	1.2207e-06	2.6	2.6
3192	8444;11866;12640	IPI00639805	NP_001135840	ENSG00000213366	GSTM2	GSTM2{glutathione S-transferase mu 2 (muscle) [Source:HGNC Symbol,Acc:4634]}	3	2	3	1	2	0	17.7	17.7	12.3	26.097	220	4	1	2.5998e-33	17.7	5.5
3193	8971;15261	IPI00645303	NP_112180	ENSG00000143376	SNX27	SNX27{sorting nexin family member 27 [Source:HGNC Symbol,Acc:20073]}	2	2	1	2	1	2	4.6	4.6	4.6	61.264	541	1	5	2.6738e-05	2.8	4.6
3195	2073;4619;5085	IPI00914899		ENSG00000050555	LAMC3	LAMC3{laminin, gamma 3 [Source:HGNC Symbol,Acc:6494]}	3	2	3	3	2	2	2.3	1.4	1.4	172.05	1587	11	17	2.8136e-36	2.3	2.3
3204	626;3878	IPI00641924	NP_872578	ENSG00000135972	MRPS9	MRPS9{mitochondrial ribosomal protein S9 [Source:HGNC Symbol,Acc:14501]}	2	2	2	1	2	1	6.3	6.3	6.3	45.834	396	9	1	2.2728e-09	6.3	3
3205	5917;9562	IPI00641990	NP_112483;NP_001164120	ENSG00000001497	LAS1L	LAS1L{LAS1-like (S. cerevisiae) [Source:HGNC Symbol,Acc:25726]}	2	2	2	1	2	1	3.1	3.1	3.1	83.064	734	5	7	3.498e-09	3.1	1.2
3206	350;655;1609;3100;3130;8190;11991;12139;13278;15019;17165;17369;18112;18904	IPI00642211	NP_064601	ENSG00000176393	RNPEP	RNPEP{arginyl aminopeptidase (aminopeptidase B) [Source:HGNC Symbol,Acc:10078]}	14	2	12	11	2	1	19.9	19.9	3.8	73.497	658	37	59	1.5946e-66	16.1	16.4
3224	9118;16416	IPI00783874	NP_115500	ENSG00000167220	HDHD2	HDHD2{haloacid dehalogenase-like hydrolase domain containing 2 [Source:HGNC Symbol,Acc:25364]}	2	2	1	2	1	2	8.1	8.1	8.1	28.536	259	3	4	5.9389e-06	3.1	8.1
3225	8991;9447	IPI00644482	NP_064617;NP_671692	ENSG00000128789	PSMG2	PSMG2{proteasome (prosome, macropain) assembly chaperone 2 [Source:HGNC Symbol,Acc:24929]}	2	2	1	2	1	2	6.8	6.8	6.8	29.396	264	8	18	1.1258e-06	4.5	6.8
3241	3207;8162	IPI00894417	NP_000584	ENSG00000224748;ENSG00000168394;ENSG00000206297;ENSG00000224212;ENSG00000226173;ENSG00000227816;ENSG00000230705;ENSG00000232367	TAP1	TAP1{transporter 1, ATP-binding cassette, sub-family B (MDR/TAP) [Source:HGNC Symbol,Acc:43]}	2	2	1	2	1	2	2.2	2.2	2.2	87.175	808	1	6	0.00044569	0.9	2.2
3247	17459;18650	IPI00646963	NP_612402	ENSG00000115255	REEP6	REEP6{receptor accessory protein 6 [Source:HGNC Symbol,Acc:30078]}	2	2	2	2	2	2	7.6	7.6	7.6	23.418	211	9	8	0.00026233	7.6	7.6
3257	3496;10395;16039	IPI00656138	NP_002567	ENSG00000149269	PAK1	PAK1{p21 protein (Cdc42/Rac)-activated kinase 1 [Source:HGNC Symbol,Acc:8590]}	3	2	2	3	1	2	5.9	2.8	2.8	60.646	545	2	5	5.1398e-33	4.8	5.9
3268	3186;17444	IPI00719622	NP_001022	ENSG00000233927	RPS28	RPS28{ribosomal protein S28 [Source:HGNC Symbol,Acc:10418]}	2	2	2	2	2	2	30.4	30.4	30.4	7.8409	69	10	25	8.6221e-29	30.4	30.4
3271	12451;15814	IPI00739099	NP_000384	ENSG00000204262	COL5A2	COL5A2{collagen, type V, alpha 2 [Source:HGNC Symbol,Acc:2210]}	2	2	2	2	2	2	1.5	1.5	1.5	144.91	1499	4	4	4.8569e-06	1.5	1.5
3275	8674;9726	IPI00742872	NP_001153695;NP_001153697;NP_112216	ENSG00000120925	RNF170	RNF170{ring finger protein 170 [Source:HGNC Symbol,Acc:25358]}	2	2	2	2	2	2	7.4	7.4	7.4	29.814	258	4	3	1.0133e-08	7.4	7.4
3276	6854;7088	IPI00742943	NP_942590	ENSG00000120253	NUP43	NUP43{nucleoporin 43kDa [Source:HGNC Symbol,Acc:21182]}	2	2	2	2	2	2	10	10	10	42.15	380	4	3	7.5363e-58	10	10
3283	7008;8700	IPI00744598	NP_006222	ENSG00000177084	POLE	POLE{polymerase (DNA directed), epsilon [Source:HGNC Symbol,Acc:9177]}	2	2	2	1	2	1	1	1	1	263.01	2297	5	1	7.3538e-07	1	0.4
3286	6736;10972	IPI01014660	NP_057053	ENSG00000249773;ENSG00000239789	RP11-15K19.2;MRPS17	RP11-15K19.2{28S ribosomal protein S17, mitochondrial [Source:UniProtKB/Swiss-Prot,Acc:Q9Y2R5]};MRPS17{mitochondrial ribosomal protein S17 [Source:HGNC Symbol,Acc:14047]}	2	2	1	2	1	2	8	8	8	25.72	225	2	4	5.2084e-06	4	8
3291	623;14491	IPI00745613	NP_061910	ENSG00000178896;ENSG00000255777	AC109322.2;EXOSC4	AC109322.2{exosome complex component RRP41 [Source:RefSeq peptide,Acc:NP_061910]};EXOSC4{exosome component 4 [Source:HGNC Symbol,Acc:18189]}	2	2	2	2	2	2	10.6	10.6	10.6	26.383	245	4	3	1.461e-27	10.6	10.6
3296	4844;16431	IPI00746221	NP_001087236;NP_997251	ENSG00000225663	FAM195B	FAM195B{family with sequence similarity 195, member B [Source:HGNC Symbol,Acc:28007]}	2	2	2	2	2	2	22.7	22.7	22.7	10.92	97	4	6	7.6003e-18	22.7	22.7
3298	5874;10695	IPI00792788	NP_079216	ENSG00000147459	DOCK5	DOCK5{dedicator of cytokinesis 5 [Source:HGNC Symbol,Acc:23476]}	2	2	2	2	2	2	1.2	1.2	1.2	216.23	1880	2	2	0.00020034	1.2	1.2
3301	3234;16169	IPI00747849	NP_001668	ENSG00000143153	ATP1B1	ATP1B1{ATPase, Na+/K+ transporting, beta 1 polypeptide [Source:HGNC Symbol,Acc:804]}	2	2	0	2	0	2	6.6	6.6	6.6	35.061	303		2	1.3547e-06	0	6.6
3302	11101;15528	IPI00794284	NP_060568	ENSG00000114346	ECT2	ECT2{epithelial cell transforming sequence 2 oncogene [Source:HGNC Symbol,Acc:3155]}	2	2	2	0	2	0	2.3	2.3	2.3	105.07	927	4		0.00072039	2.3	0
3315	2314;3249	IPI00782992	NP_057417	ENSG00000167978	SRRM2	SRRM2{serine/arginine repetitive matrix 2 [Source:HGNC Symbol,Acc:16639]}	2	2	1	1	1	1	1.1	1.1	1.1	299.61	2752	1	6	2.3224e-05	0.7	0.4
3323	15123;16165	IPI00795842	NP_006706	ENSG00000140400	MAN2C1	MAN2C1{mannosidase, alpha, class 2C, member 1 [Source:HGNC Symbol,Acc:6827]}	2	2	2	2	2	2	2.6	2.6	2.6	117.19	1057	6	6	1.9175e-48	2.6	2.6
3339	3383;7781;17439	IPI00784201		ENSG00000198707	CEP290	CEP290{centrosomal protein 290kDa [Source:HGNC Symbol,Acc:29021]}	3	2	1	3	1	2	0.8	0.6	0.6	290.54	2481	1	3	4.2564e-05	0.3	0.8
3360	5516;8314	IPI00828125	NP_060421;NP_060221;NP_001164554	ENSG00000136699	SMPD4	SMPD4{sphingomyelin phosphodiesterase 4, neutral membrane (neutral sphingomyelinase-3) [Source:HGNC Symbol,Acc:32949]}	2	2	2	2	2	2	2.6	2.6	2.6	98.147	873	6	7	7.844e-06	2.6	2.6
3366	93;211;526;16194;18550;19177	IPI00807428		ENSG00000211671;ENSG00000211648;ENSG00000211668;ENSG00000211653;ENSG00000211644;ENSG00000211662;ENSG00000211677;ENSG00000211679	IGLV2-8;IGLV1-47;IGLV2-11;IGLV1-40;IGLV1-51;IGLV3-21;IGLC3;IGLC2	IGLV2-8{immunoglobulin lambda variable 2-8 [Source:HGNC Symbol,Acc:5895]};IGLV1-47{immunoglobulin lambda variable 1-47 [Source:HGNC Symbol,Acc:5880]};IGLV2-11{immunoglobulin lambda variable 2-11 [Source:HGNC Symbol,Acc:5887]};IGLV1-40{immunoglobulin lambda variable 1-40 [Source:HGNC Symbol,Acc:5877]};IGLV1-51{immunoglobulin lambda variable 1-51 [Source:HGNC Symbol,Acc:5882]};IGLV3-21{immunoglobul…	6	2	5	6	2	2	31.5	31.5	7.2	24.746	235	18	48	3.7166e-254	25.1	31.5
3369	748;17563	IPI00816474	NP_001071639	ENSG00000134590	FAM127A	FAM127A{family with sequence similarity 127, member A [Source:HGNC Symbol,Acc:2569]}	2	2	1	2	1	2	19.5	19.5	19.5	13.171	113	2	4	1.4922e-08	10.6	19.5
3370	3618;9228;13875	IPI00827826					3	2	3	2	2	1	34.9	26.6	26.6	11.888	109	3	1	8.8278e-09	34.9	24.8
3390	11710;18226	IPI00852806	NP_056004	ENSG00000144036	EXOC6B	EXOC6B{exocyst complex component 6B [Source:HGNC Symbol,Acc:17085]}	2	2	2	2	2	2	2.7	2.7	2.7	94.2	811	3	5	0.00031597	2.7	2.7
3395	7586;18784	IPI00856012	NP_001096078	ENSG00000206384	COL6A6	COL6A6{collagen, type VI, alpha 6 [Source:HGNC Symbol,Acc:27023]}	2	2	1	2	1	2	1	1	1	247.17	2263	1	5	1.7662e-08	0.5	1
3401	5061;7644	IPI00871240	NP_055707	ENSG00000213079	SCAF8	SCAF8{SR-related CTD-associated factor 8 [Source:HGNC Symbol,Acc:20959]}	2	2	1	2	1	2	1.6	1.6	1.6	148.87	1349	2	5	7.0415e-25	1	1.6
3403	5908;11382;15982	IPI00872295	NP_001035173;NP_001621;NP_001092315	ENSG00000165390;ENSG00000186807;ENSG00000150165	ANXA8;ANXA8L2;ANXA8L1	ANXA8{annexin A8 [Source:HGNC Symbol,Acc:546]};ANXA8L2{annexin A8-like 2 [Source:HGNC Symbol,Acc:23335]};ANXA8L1{annexin A8-like 1 [Source:HGNC Symbol,Acc:23334]}	3	2	2	3	1	2	9.4	7.9	7.9	43.855	393	1	5	3.7024e-14	5.6	9.4
3404	5692;6623	IPI00872350	NP_000144;NP_001188331;NP_001188330	ENSG00000054983	GALC	GALC{galactosylceramidase [Source:HGNC Symbol,Acc:4115]}	2	2	1	2	1	2	2	2	2	77.032	685	6	8	4.9992e-07	1.2	2
3408	15096;19036	IPI00873758	NP_002638	ENSG00000078142	PIK3C3	PIK3C3{phosphoinositide-3-kinase, class 3 [Source:HGNC Symbol,Acc:8974]}	2	2	2	2	2	2	2.1	2.1	2.1	101.71	888	8	9	4.6584e-05	2.1	2.1
3411	6113;9016;17516	IPI00878669	NP_001120700;NP_006798	ENSG00000108468	CBX1	CBX1{chromobox homolog 1 [Source:HGNC Symbol,Acc:1551]}	3	2	2	1	1	1	12.7	4.2	4.2	21.915	189	2	4	1.5487e-05	12.7	3.2
3414	8721;8815	IPI00880048	NP_689596	ENSG00000144535	DIS3L2	DIS3L2{DIS3 mitotic control homolog (S. cerevisiae)-like 2 [Source:HGNC Symbol,Acc:28648]}	2	2	2	2	2	2	1.9	1.9	1.9	99.278	885	3	5	8.8264e-05	1.9	1.9
3422	8883;10301	IPI00894163	NP_001028752;NP_001157207	ENSG00000141140;ENSG00000255925	AC233700.2;MYO19	AC233700.2{myosin-XIX isoform 1 [Source:RefSeq peptide,Acc:NP_079385]};MYO19{myosin XIX [Source:HGNC Symbol,Acc:26234]}	2	2	2	2	2	2	1.9	1.9	1.9	109.13	970	16	11	1.8575e-06	1.9	1.9
3423	1911;5094;5622;6284;6464;14312;14527;18537;19178	IPI00896380		ENSG00000211899	IGHM	IGHM{immunoglobulin heavy constant mu [Source:HGNC Symbol,Acc:5541]}	9	2	4	9	1	2	20.7	20.7	4	51.79	473	9	34	6.1666e-28	9.3	20.7
3433	17340;19281	IPI00910524	NP_001011548;NP_001011549;NP_001011550;NP_002353	ENSG00000147381	MAGEA4	MAGEA4{melanoma antigen family A, 4 [Source:HGNC Symbol,Acc:6802]}	2	2	2	2	2	2	5.2	5.2	5.2	37.833	345	4	5	0.00023974	5.2	5.2
3441	1346;3090;3523;4627;5122;5359;5360;5445;6861;7142;8795;10723;10865;11313;13098;14894;15975;16200;16359;16666;17152;18278;18558;18811;18981;19294;19308	IPI00922213	NP_997641	ENSG00000115414	FN1	FN1{fibronectin 1 [Source:HGNC Symbol,Acc:3778]}	27	2	24	25	2	2	37.1	1.6	1.6	111.3	1014	19	34	0	33.3	33.9
3465	13999;18577	IPI00945153	NP_002481	ENSG00000184983;ENSG00000256106	AL021878.1;NDUFA6	AL021878.1{NADH dehydrogenase [Source:RefSeq peptide,Acc:NP_002481]};NDUFA6{NADH dehydrogenase (ubiquinone) 1 alpha subcomplex, 6, 14kDa [Source:HGNC Symbol,Acc:7690]}	2	2	0	2	0	2	15.6	15.6	15.6	17.871	154		9	5.1628e-09	0	15.6
3466	16962;16981	IPI00979341	NP_056261	ENSG00000153207	AHCTF1	AHCTF1{AT hook containing transcription factor 1 [Source:HGNC Symbol,Acc:24618]}	2	2	2	1	2	1	1.1	1.1	1.1	256	2301	3	1	0.0001976	1.1	0.6
3476	10492;16928	IPI00974532		ENSG00000143337	TOR1AIP1	TOR1AIP1{torsin A interacting protein 1 [Source:HGNC Symbol,Acc:29456]}	2	2	1	1	1	1	4.2	4.2	4.2	67.821	599	1	3	2.1699e-06	1.7	2.5
3481	4765;5693;8284;11700;14234;15067;17998	IPI00983633	NP_001189414;NP_001191023;NP_056202;NP_955776;NP_001094289	ENSG00000115540	MOBKL3	MOBKL3{MOB1, Mps One Binder kinase activator-like 3 (yeast) [Source:HGNC Symbol,Acc:17261]}	7	2	7	7	2	2	24.1	9.6	9.6	29.736	261	14	5	2.7551e-62	24.1	24.1
3482	2138;2139;10682;11064	IPI01008896	NP_001021	ENSG00000177954	RPS27	RPS27{ribosomal protein S27 [Source:HGNC Symbol,Acc:10416]}	4	2	2	4	1	2	39.3	39.3	14.3	9.461	84	4	24	1.4825e-34	29.8	39.3
3485	7077;10008;14618	IPI00012870	NP_001617	ENSG00000105221	AKT2	AKT2{v-akt murine thymoma viral oncogene homolog 2 [Source:HGNC Symbol,Acc:392]}	3	2	3	2	2	1	6	6	4.4	55.768	481	7	5	9.7429e-08	6	4
3487	5102;18364	IPI01012247		ENSG00000140950	KIAA1609	KIAA1609{KIAA1609 [Source:HGNC Symbol,Acc:29325]}	2	2	2	2	2	2	6.8	6.8	6.8	48.088	429	7	2	3.6767e-05	6.8	6.8
3488	1003;8632;17696	IPI01012991	NP_057103	ENSG00000146963	LUC7L2	LUC7L2{LUC7-like 2 (S. cerevisiae) [Source:HGNC Symbol,Acc:21608]}	3	2	2	3	1	2	7.7	7.7	5.1	46.513	392	22	22	3.9804e-16	4.8	7.7
3489	8423;12199	IPI01014563	NP_000137	ENSG00000087086	FTL	FTL{ferritin, light polypeptide [Source:HGNC Symbol,Acc:3999]}	2	2	2	2	2	2	13.7	13.7	13.7	20.019	175	3	4	2.1991e-46	13.7	13.7
65	465;9469;12036	IPI00001578	NP_001028218;NP_001093877;NP_001180582;NP_001180583;NP_001180584;NP_001180586;NP_001093878	ENSG00000178927	C17orf62	C17orf62{chromosome 17 open reading frame 62 [Source:HGNC Symbol,Acc:28672]}	3	3	3	3	3	3	11.2	11.2	11.2	20.774	187	13	15	3.3094e-08	11.2	11.2
66	1423;1610;2702	IPI00470529	NP_001005340;NP_002501	ENSG00000136235	GPNMB	GPNMB{glycoprotein (transmembrane) nmb [Source:HGNC Symbol,Acc:4462]}	3	3	3	2	3	2	6.9	6.9	6.9	68.072	607	11	21	1.7815e-46	6.9	4.4
67	13243;17351;19945	IPI00399307	NP_955450;NP_005031	ENSG00000137509	PRCP	PRCP{prolylcarboxypeptidase (angiotensinase C) [Source:HGNC Symbol,Acc:9344]}	3	3	3	2	3	2	7	7	7	58.099	517	6	6	5.3239e-30	7	4.6
72	274;5217;13929	IPI00955011	NP_001161842;NP_055595	ENSG00000044090	CUL7	CUL7{cullin 7 [Source:HGNC Symbol,Acc:21024]}	3	3	3	3	3	3	1.5	1.5	1.5	199.75	1782	5	6	8.9185e-06	1.5	1.5
88	12749;13974;19686	IPI00002150	NP_006585	ENSG00000134262	AP4B1	AP4B1{adaptor-related protein complex 4, beta 1 subunit [Source:HGNC Symbol,Acc:572]}	3	3	3	1	3	1	5.3	5.3	5.3	83.259	739	8	2	2.4431e-13	5.3	1.8
89	1685;1846;3465;9571;11184;17000	IPI00002186	NP_006411	ENSG00000124198	ARFGEF2	ARFGEF2{ADP-ribosylation factor guanine nucleotide-exchange factor 2 (brefeldin A-inhibited) [Source:HGNC Symbol,Acc:15853]}	6	3	6	5	3	3	3.6	1.9	1.9	202.04	1785	7	8	5.8169e-17	3.6	3
90	1685;1846;3469;9571;12775;15389	IPI00002188	NP_006412	ENSG00000066777	ARFGEF1	ARFGEF1{ADP-ribosylation factor guanine nucleotide-exchange factor 1(brefeldin A-inhibited) [Source:HGNC Symbol,Acc:15772]}	6	3	4	5	1	3	3.5	3.5	1.9	208.76	1849	6	12	1.6126e-19	2	2.9
104	976;2387;18910	IPI00002478	NP_001388;NP_001106820;NP_001106818;NP_001106819	ENSG00000117298	ECE1	ECE1{endothelin converting enzyme 1 [Source:HGNC Symbol,Acc:3146]}	3	3	3	3	3	3	5.3	5.3	5.3	87.163	770	5	3	6.543e-21	5.3	5.3
106	6784;13664;14213	IPI00306791	NP_001030126;NP_001030127;NP_001030128;NP_056200;NP_001030129;NP_079267;NP_006425	ENSG00000095637	SORBS1	SORBS1{sorbin and SH3 domain containing 1 [Source:HGNC Symbol,Acc:14565]}	3	3	2	2	2	2	3.5	3.5	3.5	143.86	1305	5	5	5.3236e-30	2.3	2.5
107	5149;10557;15432	IPI00002496	NP_037466;NP_068806	ENSG00000173540	GMPPB	GMPPB{GDP-mannose pyrophosphorylase B [Source:HGNC Symbol,Acc:22932]}	3	3	2	3	2	3	11.6	11.6	11.6	42.621	387	4	7	3.0085e-56	6.5	11.6
126	5213;7632;15368	IPI00002792	NP_009186	ENSG00000027847	B4GALT7	B4GALT7{xylosylprotein beta 1,4-galactosyltransferase, polypeptide 7 (galactosyltransferase I) [Source:HGNC Symbol,Acc:930]}	3	3	3	2	3	2	7.6	7.6	7.6	37.405	327	7	7	2.3307e-05	7.6	4.3
127	9015;15502;17115	IPI00002824	NP_001312	ENSG00000175183	CSRP2	CSRP2{cysteine and glycine-rich protein 2 [Source:HGNC Symbol,Acc:2470]}	3	3	3	3	3	3	17.1	17.1	17.1	20.954	193	6	12	1.1964e-26	17.1	17.1
136	7522;8685;10109	IPI00003176	NP_002766	ENSG00000166033	HTRA1	HTRA1{HtrA serine peptidase 1 [Source:HGNC Symbol,Acc:9476]}	3	3	2	3	2	3	6.5	6.5	6.5	51.286	480	6	12	1.1994e-16	4.2	6.5
137	5014;7739;10793	IPI00003217	NP_002790	ENSG00000136930	PSMB7	PSMB7{proteasome (prosome, macropain) subunit, beta type, 7 [Source:HGNC Symbol,Acc:9544]}	3	3	3	2	3	2	15.2	15.2	15.2	29.965	277	8	12	2.1116e-12	15.2	8.3
150	3917;4520;6142	IPI00003482	NP_001350	ENSG00000104325	DECR1	DECR1{2,4-dienoyl CoA reductase 1, mitochondrial [Source:HGNC Symbol,Acc:2753]}	3	3	1	3	1	3	10.7	10.7	10.7	36.067	335	4	12	2.8493e-42	3.3	10.7
157	9755;10465;16753	IPI00003766	NP_055112	ENSG00000105755	ETHE1	ETHE1{ethylmalonic encephalopathy 1 [Source:HGNC Symbol,Acc:23287]}	3	3	2	3	2	3	18.9	18.9	18.9	27.873	254	4	9	1.2255e-19	12.2	18.9
161	3238;4671;5192	IPI00003807	NP_001601	ENSG00000134575	ACP2	ACP2{acid phosphatase 2, lysosomal [Source:HGNC Symbol,Acc:123]}	3	3	3	3	3	3	7.6	7.6	7.6	48.344	423	10	12	4.6715e-22	7.6	7.6
163	1078;3558;9955	IPI00003817	NP_001166	ENSG00000111348	ARHGDIB	ARHGDIB{Rho GDP dissociation inhibitor (GDI) beta [Source:HGNC Symbol,Acc:679]}	3	3	3	3	3	3	19.9	19.9	19.9	22.988	201	5	17	3.5921e-126	19.9	19.9
181	2379;2984;9238	IPI00003944	NP_001909	ENSG00000137992	DBT	DBT{dihydrolipoamide branched chain transacylase E2 [Source:HGNC Symbol,Acc:2698]}	3	3	2	3	2	3	6	6	6	53.486	482	5	10	2.8292e-67	6	6
194	251;6291;17553;17952;18102	IPI00004397	NP_002872	ENSG00000144118	RALB	RALB{v-ral simian leukemia viral oncogene homolog B (ras related, GTP binding protein) [Source:HGNC Symbol,Acc:9840]}	5	3	2	5	0	3	25	25	17.1	25.966	228	19	36	5.5215e-11	7.9	25
195	7043;11094;13793	IPI00004406	NP_003355;NP_853628	ENSG00000183696	UPP1	UPP1{uridine phosphorylase 1 [Source:HGNC Symbol,Acc:12576]}	3	3	3	3	3	3	9.7	9.7	9.7	33.934	310	7	12	4.92e-11	9.7	9.7
196	9789;11407;12430	IPI00004416	NP_055268;NP_940818	ENSG00000130724	CHMP2A	CHMP2A{chromatin modifying protein 2A [Source:HGNC Symbol,Acc:30216]}	3	3	2	2	2	2	15.3	15.3	15.3	25.104	222	3	4	4.9183e-05	6.8	11.7
198	2394;14801;16036	IPI00004497	NP_004318;NP_067585	ENSG00000186716	BCR	BCR{breakpoint cluster region [Source:HGNC Symbol,Acc:1014]}	3	3	2	2	2	2	2.4	2.4	2.4	142.82	1271	4	6	1.5917e-06	1.7	1.7
199	883;3632;9767	IPI00004524	NP_036330	ENSG00000115271	GCA	GCA{grancalcin, EF-hand calcium binding protein [Source:HGNC Symbol,Acc:15990]}	3	3	3	3	3	3	11.5	11.5	11.5	24.01	217	7	6	8.9124e-07	11.5	11.5
204	6684;7096;19553	IPI00004668	NP_004471;NP_835368;NP_835369	ENSG00000033170	FUT8	FUT8{fucosyltransferase 8 (alpha (1,6) fucosyltransferase) [Source:HGNC Symbol,Acc:4019]}	3	3	2	3	2	3	5.9	5.9	5.9	66.515	575	3	6	1.4064e-46	3.5	5.9
214	8587;9013;12057	IPI00607584	NP_001099008;NP_055335	ENSG00000132382	MYBBP1A	MYBBP1A{MYB binding protein (P160) 1a [Source:HGNC Symbol,Acc:7546]}	3	3	2	3	2	3	2.4	2.4	2.4	149.37	1332	6	13	8.8825e-10	1.6	2.4
223	2399;4246;4768	IPI00005107	NP_000262	ENSG00000141458	NPC1	NPC1{Niemann-Pick disease, type C1 [Source:HGNC Symbol,Acc:7897]}	3	3	3	3	3	3	2.9	2.9	2.9	142.17	1278	8	12	2.4024e-26	2.9	2.9
246	504;695;1441	IPI00005634	NP_055454	ENSG00000198677	TTC37	TTC37{tetratricopeptide repeat domain 37 [Source:HGNC Symbol,Acc:23639]}	3	3	2	2	2	2	2.9	2.9	2.9	175.48	1564	3	2	1.7625e-09	1.9	2.1
247	2954;5005;7152;8481;8670;15184;16595;19841	IPI00005694	NP_112536	ENSG00000242221	PSG2	PSG2{pregnancy specific beta-1-glycoprotein 2 [Source:HGNC Symbol,Acc:9519]}	8	3	7	7	3	2	27.8	10.4	10.4	37.216	335	7	13	1.2687e-64	24.5	25.1
262	11410;12334;12582	IPI01012084	NP_003474	ENSG00000149948	HMGA2	HMGA2{high mobility group AT-hook 2 [Source:HGNC Symbol,Acc:5009]}	3	3	3	3	3	3	25.4	25.4	25.4	12.714	118	3	11	7.2466e-27	25.4	25.4
269	8781;12676;19332	IPI00006079	NP_055554;NP_001070909	ENSG00000029363	BCLAF1	BCLAF1{BCL2-associated transcription factor 1 [Source:HGNC Symbol,Acc:16863]}	3	3	3	3	3	3	4.8	4.8	4.8	106.12	920	5	4	1.3676e-10	4.8	4.8
275	12300;14521;17456	IPI00006176	NP_004703	ENSG00000185359	HGS	HGS{hepatocyte growth factor-regulated tyrosine kinase substrate [Source:HGNC Symbol,Acc:4897]}	3	3	3	3	3	3	3.3	3.3	3.3	86.191	777	4	5	6.8116e-05	3.3	3.3
280	2892;6205;15658;17493	IPI00006211	NP_004729	ENSG00000124164	VAPB	VAPB{VAMP (vesicle-associated membrane protein)-associated protein B and C [Source:HGNC Symbol,Acc:12649]}	4	3	2	4	1	3	20.6	15.6	15.6	27.228	243	1	14	5.4919e-28	10.7	20.6
282	7843;9848;11804	IPI00021570	NP_003783;NP_694880	ENSG00000107223	EDF1	EDF1{endothelial differentiation-related factor 1 [Source:HGNC Symbol,Acc:3164]}	3	3	2	3	2	3	24.3	24.3	24.3	16.368	148	5	13	1.6315e-21	18.2	24.3
286	7800;14751;17229	IPI00446875	NP_938408;NP_057050	ENSG00000125991	ERGIC3	ERGIC3{ERGIC and golgi 3 [Source:HGNC Symbol,Acc:15927]}	3	3	2	3	2	3	7.8	7.8	7.8	44.828	398	7	15	1.0378e-08	4.3	7.8
295	7230;16521;19498	IPI00006608	NP_000475;NP_001191230;NP_001191231;NP_958816;NP_001129488;NP_001129602;NP_001129603;NP_001191232;NP_958817;NP_001129601	ENSG00000142192	APP	APP{amyloid beta (A4) precursor protein [Source:HGNC Symbol,Acc:620]}	3	3	3	2	3	2	4.3	4.3	4.3	86.942	770	12	9	1.0362e-05	4.3	3.4
303	4112;8652;8841	IPI00006666	NP_001035887;NP_001035888;NP_004198	ENSG00000141526	SLC16A3	SLC16A3{solute carrier family 16, member 3 (monocarboxylic acid transporter 4) [Source:HGNC Symbol,Acc:10924]}	3	3	3	3	3	3	6	6	6	49.469	465	13	13	3.3132e-07	6	6
306	8285;11185;12655	IPI00006715	NP_006256	ENSG00000164754	RAD21	RAD21{RAD21 homolog (S. pombe) [Source:HGNC Symbol,Acc:9811]}	3	3	3	3	3	3	5.9	5.9	5.9	71.689	631	11	8	1.9841e-19	5.9	5.9
319	9236;14089;17661	IPI00007019	NP_057143	ENSG00000137168	PPIL1	PPIL1{peptidylprolyl isomerase (cyclophilin)-like 1 [Source:HGNC Symbol,Acc:9260]}	3	3	3	3	3	3	27.1	27.1	27.1	18.237	166	4	6	1.0881e-07	27.1	27.1
327	4866;5571;15868	IPI00807339	NP_055715	ENSG00000082438	COBLL1	COBLL1{COBL-like 1 [Source:HGNC Symbol,Acc:23571]}	3	3	2	3	2	3	3.1	3.1	3.1	134.85	1233	7	11	1.8784e-18	1.8	3.1
328	1972;4375;14645	IPI00220581	NP_001035951;NP_055717;NP_892118	ENSG00000080845	DLGAP4	DLGAP4{discs, large (Drosophila) homolog-associated protein 4 [Source:HGNC Symbol,Acc:24476]}	3	3	3	3	3	3	1.6	1.6	1.6	108.01	992	5	4	9.3476e-05	1.6	1.6
340	10590;16762;17319	IPI00007264	NP_055180	ENSG00000152137	HSPB8	HSPB8{heat shock 22kDa protein 8 [Source:HGNC Symbol,Acc:30171]}	3	3	1	3	1	3	18.9	18.9	18.9	21.604	196	2	10	3.7963e-06	5.1	18.9
345	8262;10574;15414	IPI00007320	NP_055787	ENSG00000141002	TCF25	TCF25{transcription factor 25 (basic helix-loop-helix) [Source:HGNC Symbol,Acc:29181]}	3	3	3	3	3	3	4.4	4.4	4.4	76.666	676	13	12	7.486e-10	4.4	4.4
347	5965;8804;12257	IPI00007334	NP_001158286;NP_055792;NP_001158287;NP_001158288;NP_001158289	ENSG00000100813	ACIN1	ACIN1{apoptotic chromatin condensation inducer 1 [Source:HGNC Symbol,Acc:17066]}	3	3	3	3	3	3	2.2	2.2	2.2	151.86	1341	8	17	4.7451e-08	2.2	2.2
352	2243;8183;8629;9321;9596;9597;10062;11953;15472	IPI00007423	NP_006392	ENSG00000136938	ANP32B	ANP32B{acidic (leucine-rich) nuclear phosphoprotein 32 family, member B [Source:HGNC Symbol,Acc:16677]}	9	3	8	9	3	3	31.5	12.7	12.7	28.787	251	17	31	1.3558e-50	25.1	31.5
356	1642;3278;5856;8476	IPI00007675	NP_057225	ENSG00000144635	DYNC1LI1	DYNC1LI1{dynein, cytoplasmic 1, light intermediate chain 1 [Source:HGNC Symbol,Acc:18745]}	4	3	4	4	3	3	11.7	9.2	9.2	56.578	523	5	5	6.2923e-33	11.7	11.7
362	6897;19002;19317	IPI00007722	NP_004028;NP_631895;NP_981949	ENSG00000116337	AMPD2	AMPD2{adenosine monophosphate deaminase 2 [Source:HGNC Symbol,Acc:469]}	3	3	2	3	2	3	2.9	2.9	2.9	101.85	890	5	8	2.5829e-06	1.6	2.9
376	4255;7282;19453	IPI00007941	NP_006451	ENSG00000186834	HEXIM1	HEXIM1{hexamethylene bis-acetamide inducible 1 [Source:HGNC Symbol,Acc:24953]}	3	3	2	3	2	3	7	7	7	40.623	359	7	16	3.7752e-07	5	7
383	5027;11244;17161	IPI00008177	NP_065767	ENSG00000023171	GRAMD1B	GRAMD1B{GRAM domain containing 1B [Source:HGNC Symbol,Acc:29214]}	3	3	3	3	3	3	4	4	4	86.236	745	22	19	1.6682e-30	4	4
408	1291;1604;19291	IPI00008552	NP_001186797;NP_006532	ENSG00000108010	GLRX3	GLRX3{glutaredoxin 3 [Source:HGNC Symbol,Acc:15987]}	3	3	3	3	3	3	10.4	10.4	10.4	37.432	335	9	12	8.2819e-23	10.4	10.4
436	3360;7735;19880	IPI00009236	NP_001166366;NP_001166367;NP_001166368;NP_001744	ENSG00000105974	CAV1	CAV1{caveolin 1, caveolae protein, 22kDa [Source:HGNC Symbol,Acc:1527]}	3	3	3	3	3	3	25.3	25.3	25.3	20.471	178	5	10	1.355e-47	25.3	25.3
438	8594;17093;18634	IPI00009268	NP_000657;NP_001185824;NP_001185825	ENSG00000114786;ENSG00000243989	RP11-155D18.11;ACY1	RP11-155D18.11{Aminoacylase-1 [Source:UniProtKB/Swiss-Prot,Acc:Q03154]};ACY1{aminoacylase 1 [Source:HGNC Symbol,Acc:177]}	3	3	3	3	3	3	7.4	7.4	7.4	55.994	498	5	7	1.58e-17	7.4	7.4
439	8653;16541;16919	IPI00009276	NP_006395	ENSG00000101000	PROCR	PROCR{protein C receptor, endothelial [Source:HGNC Symbol,Acc:9452]}	3	3	3	3	3	3	13.1	13.1	13.1	30.715	275	31	30	3.6358e-87	13.1	13.1
463	6803;9830;13268	IPI00009634	NP_067022	ENSG00000137767	SQRDL	SQRDL{sulfide quinone reductase-like (yeast) [Source:HGNC Symbol,Acc:20390]}	3	3	3	2	3	2	7.8	7.8	7.8	49.96	450	8	6	5.546e-07	7.8	5.6
464	3108;9282;11838	IPI00009659	NP_067038	ENSG00000101413	RPRD1B	RPRD1B{regulation of nuclear pre-mRNA domain containing 1B [Source:HGNC Symbol,Acc:16209]}	3	3	3	2	3	2	10.7	10.7	10.7	36.899	326	5	2	3.5315e-38	10.7	7.1
468	372;5932;9176	IPI00009737	NP_067067;NP_071440	ENSG00000025039;ENSG00000116954	RRAGD;RRAGC	RRAGD{Ras-related GTP binding D [Source:HGNC Symbol,Acc:19903]};RRAGC{Ras-related GTP binding C [Source:HGNC Symbol,Acc:19902]}	3	3	3	3	3	3	6.8	6.8	6.8	45.587	400	20	24	9.6902e-10	6.8	6.8
476	119;120;16477	IPI00009841	NP_053733;NP_005234;NP_001156757;NP_001156758	ENSG00000182944	EWSR1	EWSR1{Ewing sarcoma breakpoint region 1 [Source:HGNC Symbol,Acc:3508]}	3	3	3	3	3	3	4.1	4.1	4.1	68.965	661	5	14	1.3083e-14	4.1	4.1
477	783;1064;2438	IPI00009885	NP_001137253;NP_057678	ENSG00000134285	FKBP11	FKBP11{FK506 binding protein 11, 19 kDa [Source:HGNC Symbol,Acc:18624]}	3	3	3	3	3	3	13.4	13.4	13.4	22.18	201	8	30	4.5166e-34	13.4	13.4
479	165;10600;13500	IPI00009901	NP_005787	ENSG00000102898	NUTF2	NUTF2{nuclear transport factor 2 [Source:HGNC Symbol,Acc:13722]}	3	3	3	3	3	3	29.9	29.9	29.9	14.478	127	5	11	3.7109e-52	29.9	29.9
494	2263;10970;18314	IPI00010130	NP_001028216;NP_001028228;NP_002056	ENSG00000135821	GLUL	GLUL{glutamate-ammonia ligase [Source:HGNC Symbol,Acc:4341]}	3	3	2	3	2	3	8.6	8.6	8.6	42.064	373	3	6	1.2368e-11	6.4	8.6
501	14001;16784;18818	IPI00922055	NP_001171488;NP_001171512;NP_001171513;NP_065438;NP_001073331;NP_001171514;NP_001073332	ENSG00000155368	DBI	DBI{diazepam binding inhibitor (GABA receptor modulator, acyl-CoA binding protein) [Source:HGNC Symbol,Acc:2690]}	3	3	2	3	2	3	29.7	29.7	29.7	16.495	148	13	16	5.1554e-101	16.2	29.7
502	364;6228;13657;16142	IPI00010204	NP_003008	ENSG00000112081	SRSF3	SRSF3{serine/arginine-rich splicing factor 3 [Source:HGNC Symbol,Acc:10785]}	4	3	2	4	1	3	22.6	14	14	19.329	164	17	26	7.1659e-32	14	22.6
508	865;5722;7663	IPI00010279	NP_057725	ENSG00000006007	GDE1	GDE1{glycerophosphodiester phosphodiesterase 1 [Source:HGNC Symbol,Acc:29644]}	3	3	1	3	1	3	10	10	10	37.718	331	2	12	1.0486e-36	2.4	10
509	8122;15564;16957	IPI00010317	NP_057740;NP_006055;NP_006561	ENSG00000083750;ENSG00000155876	RRAGB;RRAGA	RRAGB{Ras-related GTP binding B [Source:HGNC Symbol,Acc:19901]};RRAGA{Ras-related GTP binding A [Source:HGNC Symbol,Acc:16963]}	3	3	3	3	3	3	7.2	7.2	7.2	43.25	374	7	8	9.2124e-42	7.2	7.2
510	6167;14616;15637	IPI00847535	NP_002719	ENSG00000186652	PRG2	PRG2{proteoglycan 2, bone marrow (natural killer cell activator, eosinophil granule major basic protein) [Source:HGNC Symbol,Acc:9362]}	3	3	3	3	3	3	6.6	6.6	6.6	56.982	502	10	12	5.0785e-20	6.6	6.6
514	14927;15403;18717	IPI00010400	NP_000923;NP_001171812	ENSG00000149782	PLCB3	PLCB3{phospholipase C, beta 3 (phosphatidylinositol-specific) [Source:HGNC Symbol,Acc:9056]}	3	3	2	3	2	3	3.2	3.2	3.2	138.8	1234	2	6	1.3877e-17	1.5	3.2
518	1350;9716;9808	IPI00010415	NP_863654;NP_009205;NP_863655;NP_863656	ENSG00000097021	ACOT7	ACOT7{acyl-CoA thioesterase 7 [Source:HGNC Symbol,Acc:24157]}	3	3	2	2	2	2	11.3	11.3	11.3	41.796	380	14	27	6.2702e-50	8.2	6.1
522	12784;16847;18049	IPI00010463	NP_004277	ENSG00000100226	GTPBP1	GTPBP1{GTP binding protein 1 [Source:HGNC Symbol,Acc:4669]}	3	3	2	2	2	2	4.6	4.6	4.6	72.453	669	9	7	1.6322e-10	2.8	3.1
531	2197;3451;5993;10138	IPI00010790	NP_001702	ENSG00000182492	BGN	BGN{biglycan [Source:HGNC Symbol,Acc:1044]}	4	3	4	4	3	3	13	10.9	10.9	41.654	368	11	11	4.2657e-33	13	13
560	485;4439;10374	IPI00980045	NP_000602;NP_001120695;NP_001120697;NP_001120698;NP_001120699;NP_976074;NP_976075;NP_976076	ENSG00000085063	CD59	CD59{CD59 molecule, complement regulatory protein [Source:HGNC Symbol,Acc:1689]}	3	3	3	3	3	3	24.6	24.6	24.6	14.529	130	6	17	9.0453e-17	24.6	24.6
563	1330;7985;18312	IPI00011511	NP_149061;NP_060299	ENSG00000069998	CECR5	CECR5{cat eye syndrome chromosome region, candidate 5 [Source:HGNC Symbol,Acc:1843]}	3	3	2	3	2	3	10.4	10.4	10.4	46.321	423	2	10	2.081e-25	6.9	10.4
567	89;4496;16091	IPI00018311	NP_036560;NP_001154835;NP_001154836;NP_059429	ENSG00000156642	NPTN	NPTN{neuroplastin [Source:HGNC Symbol,Acc:17867]}	3	3	2	3	2	3	6.8	6.8	6.8	44.387	398	10	12	1.4673e-13	4.5	6.8
572	856;9523;15475	IPI00011635	NP_056182	ENSG00000099968	BCL2L13	BCL2L13{BCL2-like 13 (apoptosis facilitator) [Source:HGNC Symbol,Acc:17164]}	3	3	3	3	3	3	8.7	8.7	8.7	52.723	485	24	23	4.1914e-52	8.7	8.7
573	1528;11534;19174	IPI00376403	NP_857593;NP_001027539;NP_003701	ENSG00000166145	SPINT1	SPINT1{serine peptidase inhibitor, Kunitz type 1 [Source:HGNC Symbol,Acc:11246]}	3	3	3	3	3	3	6	6	6	58.397	529	8	12	5.2649e-25	6	6
576	413;12370;18441	IPI00221327	NP_001124313;NP_003720	ENSG00000137996	RTCD1	RTCD1{RNA terminal phosphate cyclase domain 1 [Source:HGNC Symbol,Acc:17981]}	3	3	2	2	2	2	9	9	9	40.709	379	4	12	9.9254e-16	6.3	5.3
578	5267;7460;8532	IPI00011770	NP_002480	ENSG00000189043	NDUFA4	NDUFA4{NADH dehydrogenase (ubiquinone) 1 alpha subcomplex, 4, 9kDa [Source:HGNC Symbol,Acc:7687]}	3	3	2	3	2	3	37	37	37	9.3697	81	5	22	9.4039e-25	24.7	37
579	4680;7178;10809	IPI00011875	NP_006074	ENSG00000113141	IK	IK{IK cytokine, down-regulator of HLA II [Source:HGNC Symbol,Acc:5958]}	3	3	3	3	3	3	5.4	5.4	5.4	65.601	557	5	7	2.2144e-15	5.4	5.4
580	313;8473;19881	IPI00011876	NP_002442	ENSG00000099810	MTAP	MTAP{methylthioadenosine phosphorylase [Source:HGNC Symbol,Acc:7413]}	3	3	2	3	2	3	14	14	14	33.186	300	5	14	1.3282e-47	8	14
584	4881;5363;6203	IPI00025160	NP_060522	ENSG00000103043	VAC14	VAC14{Vac14 homolog (S. cerevisiae) [Source:HGNC Symbol,Acc:25507]}	3	3	2	3	2	3	3.7	3.7	3.7	87.972	782	11	13	1.314e-12	2.8	3.7
593	3340;6626;11168	IPI00012107	NP_001432	ENSG00000117480	FAAH	FAAH{fatty acid amide hydrolase [Source:HGNC Symbol,Acc:3553]}	3	3	3	2	3	2	6	6	6	63.065	579	5	4	2.1969e-11	6	3.6
604	1361;8507;11478	IPI00795627	NP_009139	ENSG00000114686	MRPL3	MRPL3{mitochondrial ribosomal protein L3 [Source:HGNC Symbol,Acc:10379]}	3	3	3	3	3	3	5.1	5.1	5.1	41.628	375	9	8	1.0924e-10	5.1	5.1
607	19042;19271;19708	IPI00012440	NP_114409	ENSG00000001036	FUCA2	FUCA2{fucosidase, alpha-L- 2, plasma [Source:HGNC Symbol,Acc:4008]}	3	3	3	3	3	3	7.3	7.3	7.3	54.066	467	6	6	8.6409e-07	7.3	7.3
614	1680;6272;13153;13310;14748;19370	IPI00012490	NP_001001396;NP_001675	ENSG00000058668	ATP2B4	ATP2B4{ATPase, Ca++ transporting, plasma membrane 4 [Source:HGNC Symbol,Acc:817]}	6	3	4	6	2	3	5.3	5.3	3.2	137.92	1241	21	26	1.2576e-111	3.1	5.3
621	1733;8039;15367	IPI00012578	NP_002259	ENSG00000186432	KPNA4	KPNA4{karyopherin alpha 4 (importin alpha 3) [Source:HGNC Symbol,Acc:6397]}	3	3	3	1	3	1	8.4	8.4	8.4	57.886	521	3	3	7.0528e-53	8.4	2.7
632	246;14538;15703	IPI00012828	NP_001598	ENSG00000060971	ACAA1	ACAA1{acetyl-CoA acyltransferase 1 [Source:HGNC Symbol,Acc:82]}	3	3	3	3	3	3	5.9	5.9	5.9	44.292	424	7	9	3.131e-33	5.9	5.9
634	1382;5523;17956	IPI00012835	NP_001319;NP_001012632	ENSG00000159692	CTBP1	CTBP1{C-terminal binding protein 1 [Source:HGNC Symbol,Acc:2494]}	3	3	2	3	2	3	8.6	8.6	8.6	47.535	440	14	12	1.3862e-40	6.1	8.6
639	574;5315;18522	IPI00890743	NP_001116827;NP_002712;NP_001116841	ENSG00000119414	PPP6C	PPP6C{protein phosphatase 6, catalytic subunit [Source:HGNC Symbol,Acc:9323]}	3	3	2	2	2	2	9.1	9.1	9.1	38.946	342	5	6	9.8524e-13	6.4	5.6
641	9724;12445;16862	IPI00030654	NP_008938	ENSG00000111605	CPSF6	CPSF6{cleavage and polyadenylation specific factor 6, 68kDa [Source:HGNC Symbol,Acc:13871]}	3	3	2	3	2	3	5.8	5.8	5.8	63.47	588	5	19	4.9489e-85	3.6	5.8
650	652;2727;11801;14085;14819	IPI00013174	NP_006319	ENSG00000239306	RBM14	RBM14{RNA binding motif protein 14 [Source:HGNC Symbol,Acc:14219]}	5	3	4	5	2	3	8.1	8.1	4.8	69.491	669	12	17	4.1348e-15	6.3	8.1
665	9088;9195;14286	IPI00792837	NP_001091977;NP_003448;NP_001027464	ENSG00000010244	ZNF207	ZNF207{zinc finger protein 207 [Source:HGNC Symbol,Acc:12998]}	3	3	2	3	2	3	6.3	6.3	6.3	52.693	494	3	7	7.7168e-07	4.9	6.3
667	12835;17291;18084	IPI00013468	NP_004716;NP_001007794	ENSG00000154473	BUB3	BUB3{budding uninhibited by benzimidazoles 3 homolog (yeast) [Source:HGNC Symbol,Acc:1151]}	3	3	3	3	3	3	12.5	12.5	12.5	37.154	328	10	10	1.3146e-91	12.5	12.5
688	12112;15484;16263	IPI00013862	NP_036277	ENSG00000168393	DTYMK	DTYMK{deoxythymidylate kinase (thymidylate kinase) [Source:HGNC Symbol,Acc:3061]}	3	3	2	3	2	3	16	16	16	23.819	212	3	6	9.0841e-07	10.4	16
712	1508;4105;15477	IPI00793920	NP_060018;NP_001127894	ENSG00000091527	CDV3	CDV3{CDV3 homolog (mouse) [Source:HGNC Symbol,Acc:26928]}	3	3	1	3	1	3	12	12	12	28.598	258	2	9	1.987e-05	5.8	12
719	2888;3550;6355	IPI00014263	NP_071496	ENSG00000106682	EIF4H	EIF4H{eukaryotic translation initiation factor 4H [Source:HGNC Symbol,Acc:12741]}	3	3	2	3	2	3	22.6	22.6	22.6	27.385	248	3	19	7.9047e-22	10.9	22.6
724	12866;16933;19750	IPI00014375	NP_001968	ENSG00000138792	ENPEP	ENPEP{glutamyl aminopeptidase (aminopeptidase A) [Source:HGNC Symbol,Acc:3355]}	3	3	2	3	2	3	3.9	3.9	3.9	109.24	957	4	4	1.0754e-08	2.5	3.9
745	1950;7002;15763;17122	IPI00910593	NP_004359;NP_958434	ENSG00000064666	CNN2	CNN2{calponin 2 [Source:HGNC Symbol,Acc:2156]}	4	3	3	3	2	2	15.2	13.3	13.3	35.943	330	6	7	2.27e-65	11.8	10
750	8111;17129;18021	IPI01012761	NP_060725	ENSG00000134759	ELP2	ELP2{elongation protein 2 homolog (S. cerevisiae) [Source:HGNC Symbol,Acc:18248]}	3	3	3	3	3	3	2.4	2.4	2.4	99.987	891	9	9	5.5776e-05	2.4	2.4
760	8042;8043;11573	IPI00982108	NP_036232	ENSG00000123992	DNPEP	DNPEP{aspartyl aminopeptidase [Source:HGNC Symbol,Acc:2981]}	3	3	2	3	2	3	4.7	4.7	4.7	54.53	493	3	3	2.2328e-07	4.7	4.7
763	4983;11179;14944	IPI00015897	NP_036256;NP_001137545	ENSG00000110172	CHORDC1	CHORDC1{cysteine and histidine-rich domain (CHORD) containing 1 [Source:HGNC Symbol,Acc:14525]}	3	3	2	3	2	3	11.4	11.4	11.4	37.489	332	3	6	1.2347e-20	7.2	11.4
767	2600;7314;8099;17030	IPI00981057	NP_001180197;NP_001180198;NP_036287	ENSG00000125746	EML2	EML2{echinoderm microtubule associated protein like 2 [Source:HGNC Symbol,Acc:18035]}	4	3	2	4	1	3	4.9	4.9	4	92.069	850	8	16	1.7796e-17	2.1	4.9
770	6537;16247;16438	IPI00015953	NP_004719	ENSG00000165732	DDX21	DDX21{DEAD (Asp-Glu-Ala-Asp) box polypeptide 21 [Source:HGNC Symbol,Acc:2744]}	3	3	2	2	2	2	4.2	4.2	4.2	87.343	783	5	18	1.1203e-28	2.8	2.8
771	3416;10934;16287;16996;18996	IPI00015954	NP_001136120;NP_064535	ENSG00000079332	SAR1A	SAR1A{SAR1 homolog A (S. cerevisiae) [Source:HGNC Symbol,Acc:10534]}	5	3	4	4	2	2	23.2	23.2	13.6	22.367	198	27	62	1.0536e-47	19.7	19.2
772	473;1564;13834	IPI00015972	NP_004365	ENSG00000164919	COX6C	COX6C{cytochrome c oxidase subunit VIc [Source:HGNC Symbol,Acc:2285]}	3	3	3	3	3	3	36	36	36	8.7813	75	5	11	2.3322e-07	36	36
775	3124;11491;11657;16191	IPI00016077	NP_001474;NP_001189398	ENSG00000146729	GBAS	GBAS{glioblastoma amplified sequence [Source:HGNC Symbol,Acc:4179]}	4	3	3	4	3	3	14.7	11.9	11.9	33.742	286	11	8	1.5708e-28	11.9	14.7
780	4186;6246;18703	IPI00016334	NP_006491	ENSG00000076706	MCAM	MCAM{melanoma cell adhesion molecule [Source:HGNC Symbol,Acc:6934]}	3	3	2	3	2	3	5.3	5.3	5.3	71.607	646	3	6	7.5345e-17	3.4	5.3
790	383;4483;4618;9164;10271;13398	IPI00016513	NP_057215	ENSG00000084733	RAB10	RAB10{RAB10, member RAS oncogene family [Source:HGNC Symbol,Acc:9759]}	6	3	6	6	3	3	31	20	16.5	22.541	200	11	22	2.7218e-85	31	31
796	332;3991;4126;7516;9249;9471;9892;11767;14132;14384	IPI00016610	NP_006187	ENSG00000169564	PCBP1	PCBP1{poly(rC) binding protein 1 [Source:HGNC Symbol,Acc:8647]}	10	3	7	10	2	3	28.1	9.3	9.3	37.497	356	7	34	5.5711e-139	21.6	28.1
799	606;7475;18342	IPI00016669	NP_005605	ENSG00000106615	RHEB	RHEB{Ras homolog enriched in brain [Source:HGNC Symbol,Acc:10011]}	3	3	2	3	2	3	18.5	18.5	18.5	20.497	184	2	11	3.0063e-08	14.7	18.5
801	8963;9577;18924	IPI00016702	NP_036329	ENSG00000011454	RABGAP1	RABGAP1{RAB GTPase activating protein 1 [Source:HGNC Symbol,Acc:17155]}	3	3	3	2	3	2	2.9	2.9	2.9	121.74	1069	9	6	9.6614e-07	2.9	1.9
806	132;17169;19388	IPI00016862	NP_000628;NP_001182031;NP_001182032;NP_001182033	ENSG00000104687	GSR	GSR{glutathione reductase [Source:HGNC Symbol,Acc:4623]}	3	3	1	3	1	3	5.7	5.7	5.7	56.256	522	1	7	1.0085e-07	2.9	5.7
811	4216;15755;17297	IPI00016932	NP_001558	ENSG00000165458	INPPL1	INPPL1{inositol polyphosphate phosphatase-like 1 [Source:HGNC Symbol,Acc:6080]}	3	3	3	1	3	1	2.9	2.9	2.9	138.6	1258	4	2	2.991e-08	2.9	0.6
820	4512;5405;9353	IPI00017303	NP_000242	ENSG00000095002	MSH2	MSH2{mutS homolog 2, colon cancer, nonpolyposis type 1 (E. coli) [Source:HGNC Symbol,Acc:7325]}	3	3	2	2	2	2	4.1	4.1	4.1	104.74	934	3	5	1.9953e-19	3.2	2.4
822	4117;4259;17082	IPI00017342	NP_001656	ENSG00000177105	RHOG	RHOG{ras homolog gene family, member G (rho G) [Source:HGNC Symbol,Acc:672]}	3	3	2	3	2	3	23	23	23	21.308	191	2	13	1.0463e-55	14.1	23
825	3007;9069;12781	IPI00017373	NP_002938	ENSG00000106399	RPA3	RPA3{replication protein A3, 14kDa [Source:HGNC Symbol,Acc:10291]}	3	3	2	3	2	3	35.5	35.5	35.5	13.569	121	11	9	2.6938e-136	27.3	35.5
851	11485;12202;19560	IPI00018120	NP_001186778;NP_004623;NP_387506;NP_001186779;NP_001186780	ENSG00000132676	DAP3	DAP3{death associated protein 3 [Source:HGNC Symbol,Acc:2673]}	3	3	2	2	2	2	7.3	7.3	7.3	45.566	398	19	13	1.3897e-08	5.5	4.5
855	7373;9633;15008;19529	IPI00018195	NP_002737;NP_001103361	ENSG00000102882	MAPK3	MAPK3{mitogen-activated protein kinase 3 [Source:HGNC Symbol,Acc:6877]}	4	3	4	3	3	2	15	12.4	12.4	43.135	379	6	7	2.2273e-40	15	12.1
874	859;10150;11464	IPI00018500	NP_005215	ENSG00000116017	ARID3A	ARID3A{AT rich interactive domain 3A (BRIGHT-like) [Source:HGNC Symbol,Acc:3031]}	3	3	3	3	3	3	6.4	6.4	6.4	62.888	593	19	11	3.4772e-92	6.4	6.4
876	5037;7649;19218	IPI00018606	NP_061888	ENSG00000033100	CHPF2	CHPF2{chondroitin polymerizing factor 2 [Source:HGNC Symbol,Acc:29270]}	3	3	3	3	3	3	3.5	3.5	3.5	85.947	772	10	11	3.8354e-05	3.5	3.5
877	18;3444;8495	IPI00790757	NP_004081	ENSG00000108861	DUSP3	DUSP3{dual specificity phosphatase 3 [Source:HGNC Symbol,Acc:3069]}	3	3	1	3	1	3	20.5	20.5	20.5	23.165	210	2	7	2.3105e-22	6.2	20.5
880	7205;12150;19268	IPI00168849	NP_004231	ENSG00000125733	TRIP10	TRIP10{thyroid hormone receptor interactor 10 [Source:HGNC Symbol,Acc:12304]}	3	3	3	3	3	3	5	5	5	68.351	601	5	3	3.3259e-07	5	5
884	3663;6512;6513;8871;11148;13023;13305	IPI00018871	NP_060654	ENSG00000134108	ARL8B	ARL8B{ADP-ribosylation factor-like 8B [Source:HGNC Symbol,Acc:25564]}	7	3	7	7	3	3	33.6	33.6	9.2	27.252	238	45	52	2.0633e-176	33.6	33.6
890	1662;3309;14500	IPI00646350	NP_001018170;NP_003896;NP_001018169	ENSG00000159593	NAE1	NAE1{NEDD8 activating enzyme E1 subunit 1 [Source:HGNC Symbol,Acc:621]}	3	3	2	3	2	3	7.1	7.1	7.1	60.516	537	4	8	4.5335e-07	5	7.1
899	3437;7706;14008	IPI00019169	NP_003016	ENSG00000141985	SH3GL1	SH3GL1{SH3-domain GRB2-like 1 [Source:HGNC Symbol,Acc:10830]}	3	3	1	3	1	3	11.4	11.4	11.4	41.489	368	1	11	7.1756e-68	2.7	11.4
901	9099;16284;18206	IPI00019269	NP_079510	ENSG00000140395	WDR61	WDR61{WD repeat domain 61 [Source:HGNC Symbol,Acc:30300]}	3	3	2	3	2	3	13.1	13.1	13.1	33.58	305	7	9	4.2636e-09	9.8	13.1
907	12764;13855;18158	IPI00019380	NP_002477	ENSG00000136937	NCBP1	NCBP1{nuclear cap binding protein subunit 1, 80kDa [Source:HGNC Symbol,Acc:7658]}	3	3	3	3	3	3	5.3	5.3	5.3	91.838	790	8	7	1.2837e-41	5.3	5.3
912	3514;9746;9861	IPI00019427	NP_001020095;NP_060731;NP_839955	ENSG00000090989	EXOC1	EXOC1{exocyst complex component 1 [Source:HGNC Symbol,Acc:30380]}	3	3	3	3	3	3	3	3	3	101.98	894	6	6	1.6401e-08	3	3
929	3521;5266;9573	IPI00019812	NP_001191213;NP_006238	ENSG00000011485	PPP5C	PPP5C{protein phosphatase 5, catalytic subunit [Source:HGNC Symbol,Acc:9322]}	3	3	2	3	2	3	7.4	7.4	7.4	56.878	499	27	21	3.7476e-45	3.6	7.4
935	10958;16139;18604	IPI00019927	NP_002802	ENSG00000103035	PSMD7	PSMD7{proteasome (prosome, macropain) 26S subunit, non-ATPase, 7 [Source:HGNC Symbol,Acc:9565]}	3	3	3	3	3	3	10.2	10.2	10.2	37.025	324	18	29	4.9471e-26	10.2	10.2
938	3043;4907;7059	IPI00019977	NP_005504	ENSG00000153767	GTF2E1	GTF2E1{general transcription factor IIE, polypeptide 1, alpha 56kDa [Source:HGNC Symbol,Acc:4650]}	3	3	2	3	2	3	8.4	8.4	8.4	49.452	439	4	3	7.233e-05	5	8.4
945	8606;9275;12567	IPI00020021	NP_003463;NP_001128181	ENSG00000124795	DEK	DEK{DEK oncogene [Source:HGNC Symbol,Acc:2768]}	3	3	3	3	3	3	8	8	8	42.674	375	22	23	5.0378e-14	8	8
951	2299;3322;15202;16337;16669	IPI00020091	NP_000599	ENSG00000228278	ORM2	ORM2{orosomucoid 2 [Source:HGNC Symbol,Acc:8499]}	5	3	1	5	1	3	23.4	15.4	15.4	23.602	201	17	28	1.8753e-34	5	23.4
960	5683;7773;8303;9940	IPI00020418	NP_006261	ENSG00000126458	RRAS	RRAS{related RAS viral (r-ras) oncogene homolog [Source:HGNC Symbol,Acc:10447]}	4	3	1	4	1	3	23.4	23.4	16.1	23.48	218	2	17	7.6912e-94	5.5	23.4
962	2110;12644;18639	IPI00020472	NP_060917	ENSG00000125037	TMEM111	TMEM111{transmembrane protein 111 [Source:HGNC Symbol,Acc:23999]}	3	3	2	3	2	3	15.3	15.3	15.3	29.952	261	4	6	1.9242e-17	8.4	15.3
963	2405;12122;18648	IPI00020495	NP_150597	ENSG00000134056;ENSG00000256303	AC093223.2;MRPS36	AC093223.2{28S ribosomal protein S36, mitochondrial [Source:RefSeq peptide,Acc:NP_150597]};MRPS36{mitochondrial ribosomal protein S36 [Source:HGNC Symbol,Acc:16631]}	3	3	2	2	2	2	36.9	36.9	36.9	11.466	103	3	5	1.8999e-07	25.2	24.3
965	1006;7040;10961	IPI00020510	NP_060934	ENSG00000122873	CISD1	CISD1{CDGSH iron sulfur domain 1 [Source:HGNC Symbol,Acc:30880]}	3	3	3	3	3	3	34.3	34.3	34.3	12.199	108	7	15	4.9847e-32	34.3	34.3
973	4097;5214;11235	IPI00976779	NP_005691;NP_569710	ENSG00000254986	DPP3	DPP3{dipeptidyl-peptidase 3 [Source:HGNC Symbol,Acc:3008]}	3	3	3	3	3	3	3.6	3.6	3.6	84.375	757	7	10	4.3029e-07	3.6	3.6
976	3648;4860;16146	IPI00020928	NP_003192	ENSG00000108064	TFAM	TFAM{transcription factor A, mitochondrial [Source:HGNC Symbol,Acc:11741]}	3	3	2	2	2	2	13.8	13.8	13.8	29.096	246	2	4	1.2679e-32	10.6	7.7
977	801;3173;8279	IPI00983445	NP_004453	ENSG00000079459	FDFT1	FDFT1{farnesyl-diphosphate farnesyltransferase 1 [Source:HGNC Symbol,Acc:3629]}	3	3	2	3	2	3	8.6	8.6	8.6	53.405	474	11	16	2.0905e-38	4.9	8.6
994	7569;12608;14247;14279	IPI00021258	NP_001020766;NP_001020764;NP_055262	ENSG00000164144	ARFIP1	ARFIP1{ADP-ribosylation factor interacting protein 1 [Source:HGNC Symbol,Acc:21496]}	4	3	2	4	1	3	11.3	9.7	9.7	41.738	373	14	15	1.1218e-130	6.2	11.3
1017	3020;10501;12210	IPI00021727	NP_000706	ENSG00000123838	C4BPA	C4BPA{complement component 4 binding protein, alpha [Source:HGNC Symbol,Acc:1325]}	3	3	1	3	1	3	7.2	7.2	7.2	67.033	597	1	5	6.2798e-05	3.4	7.2
1047	3079;6173;19359	IPI00022078	NP_001128714;NP_006087	ENSG00000104419	NDRG1	NDRG1{N-myc downstream regulated 1 [Source:HGNC Symbol,Acc:7679]}	3	3	3	3	3	3	11.9	11.9	11.9	42.835	394	7	13	5.508e-85	11.9	11.9
1056	861;7996;15687;19457	IPI00022229	NP_000375	ENSG00000084674	APOB	APOB{apolipoprotein B (including Ag(x) antigen) [Source:HGNC Symbol,Acc:603]}	4	3	3	4	2	3	0.7	0.5	0.5	515.6	4563	7	9	5.0799e-07	0.5	0.7
1074	2920;5080;7196	IPI00022431	NP_001613	ENSG00000145192	AHSG	AHSG{alpha-2-HS-glycoprotein [Source:HGNC Symbol,Acc:349]}	3	3	2	3	2	3	5.5	5.5	5.5	46.626	433	2	11	1.1462e-07	3.9	5.5
1077	9714;10629;18100	IPI00022442	NP_004994	ENSG00000004779	NDUFAB1	NDUFAB1{NADH dehydrogenase (ubiquinone) 1, alpha/beta subcomplex, 1, 8kDa [Source:HGNC Symbol,Acc:7694]}	3	3	3	3	3	3	19.2	19.2	19.2	17.417	156	17	17	6.8723e-16	19.2	19.2
1078	4846;13425;14057	IPI00968077	NP_001125	ENSG00000081051	AFP	AFP{alpha-fetoprotein [Source:HGNC Symbol,Acc:317]}	3	3	2	3	2	3	4.7	4.7	4.7	70.449	622	5	11	3.4816e-18	3.5	4.7
1083	4773;13896;17797	IPI00022479	NP_003913	ENSG00000103657	HERC1	HERC1{hect (homologous to the E6-AP (UBE3A) carboxyl terminus) domain and RCC1 (CHC1)-like domain (RLD) 1 [Source:HGNC Symbol,Acc:4867]}	3	3	2	2	2	2	0.5	0.5	0.5	532.35	4862	3	7	6.8799e-05	0.4	0.3
1100	7241;11881;18095	IPI00984294	NP_006279	ENSG00000154096	THY1	THY1{Thy-1 cell surface antigen [Source:HGNC Symbol,Acc:11801]}	3	3	2	3	2	3	15.4	15.4	15.4	18.585	169	18	19	9.9196e-43	9.5	15.4
1111	13359;16239;17206	IPI00023137	NP_055321	ENSG00000136816	TOR1B	TOR1B{torsin family 1, member B (torsin B) [Source:HGNC Symbol,Acc:11995]}	3	3	2	3	2	3	9.2	9.2	9.2	37.978	336	3	4	4.6411e-21	5.1	9.2
1115	6543;7910;13619	IPI00023191	NP_005479;NP_001129202	ENSG00000100284	TOM1	TOM1{target of myb1 (chicken) [Source:HGNC Symbol,Acc:11982]}	3	3	2	3	2	3	7.2	7.2	7.2	54.831	501	10	11	6.894e-29	5.2	7.2
1131	1417;10560;12536	IPI00023640	NP_004699	ENSG00000105185	PDCD5	PDCD5{programmed cell death 5 [Source:HGNC Symbol,Acc:8764]}	3	3	1	3	1	3	24	24	24	14.285	125	2	14	3.9104e-20	8.8	24
1147	7265;10980;16851;17048	IPI00024129	NP_000934	ENSG00000168938	PPIC	PPIC{peptidylprolyl isomerase C (cyclophilin C) [Source:HGNC Symbol,Acc:9256]}	4	3	3	4	2	3	17.5	14.6	14.6	22.763	212	7	14	2.2666e-19	11.3	17.5
1169	159;4026;19253	IPI00024566	NP_064541	ENSG00000106392	C1GALT1	C1GALT1{core 1 synthase, glycoprotein-N-acetylgalactosamine 3-beta-galactosyltransferase, 1 [Source:HGNC Symbol,Acc:24337]}	3	3	2	3	2	3	10.5	10.5	10.5	42.202	363	5	5	2.7964e-06	6.9	10.5
1171	6026;8880;18258	IPI00024623	NP_001600	ENSG00000196177	ACADSB	ACADSB{acyl-CoA dehydrogenase, short/branched chain [Source:HGNC Symbol,Acc:91]}	3	3	1	3	1	3	7.9	7.9	7.9	47.485	432	2	8	8.5269e-30	3.5	7.9
1185	6871;15565;17320	IPI00746455	NP_005757	ENSG00000152767	FARP1	FARP1{FERM, RhoGEF (ARHGEF) and pleckstrin domain protein 1 (chondrocyte-derived) [Source:HGNC Symbol,Acc:3591]}	3	3	3	3	3	3	3	3	3	122.11	1076	14	7	1.3572e-08	3	3
1188	1326;6782;10019	IPI00024802	NP_003963	ENSG00000095564	BTAF1	BTAF1{BTAF1 RNA polymerase II, B-TFIID transcription factor-associated, 170kDa (Mot1 homolog, S. cerevisiae) [Source:HGNC Symbol,Acc:17307]}	3	3	3	3	3	3	1.9	1.9	1.9	206.89	1849	11	9	4.4065e-11	1.9	1.9
1197	6250;8983;11137	IPI00024934	NP_000246	ENSG00000146085	MUT	MUT{methylmalonyl CoA mutase [Source:HGNC Symbol,Acc:7526]}	3	3	3	3	3	3	4.4	4.4	4.4	83.134	750	8	8	2.475e-09	4.4	4.4
1212	6964;11862;18764	IPI00025178	NP_005863	ENSG00000116752	BCAS2	BCAS2{breast carcinoma amplified sequence 2 [Source:HGNC Symbol,Acc:975]}	3	3	2	3	2	3	11.1	11.1	11.1	26.131	225	4	4	1.1828e-08	11.1	11.1
1224	18498;18499;18757	IPI00025344	NP_004544	ENSG00000145494	NDUFS6	NDUFS6{NADH dehydrogenase (ubiquinone) Fe-S protein 6, 13kDa (NADH-coenzyme Q reductase) [Source:HGNC Symbol,Acc:7713]}	3	3	1	3	1	3	16.9	16.9	16.9	13.711	124	1	6	1.9163e-09	11.3	16.9
1239	2294;8170;12409	IPI00025803	NP_000199;NP_001073285	ENSG00000171105	INSR	INSR{insulin receptor [Source:HGNC Symbol,Acc:6091]}	3	3	3	3	3	3	2.3	2.3	2.3	158.43	1402	10	9	3.6259e-12	2.3	2.3
1241	5283;7304;7403;13333	IPI00025818	NP_065207	ENSG00000141429	GALNT1	GALNT1{UDP-N-acetyl-alpha-D-galactosamine:polypeptide N-acetylgalactosaminyltransferase 1 (GalNAc-T1) [Source:HGNC Symbol,Acc:4123]}	4	3	3	3	2	2	6.6	6.6	4.8	64.218	559	8	7	6.3243e-22	5.5	5
1254	15132;16352;18379	IPI00026156	NP_005326	ENSG00000180353	HCLS1	HCLS1{hematopoietic cell-specific Lyn substrate 1 [Source:HGNC Symbol,Acc:4844]}	3	3	1	3	1	3	6.6	6.6	6.6	54.013	486	1	3	6.9742e-05	1.9	6.6
1255	3174;4711;5114;9180	IPI00026182	NP_006127	ENSG00000198898	CAPZA2	CAPZA2{capping protein (actin filament) muscle Z-line, alpha 2 [Source:HGNC Symbol,Acc:1490]}	4	3	3	4	2	3	21.7	18.2	18.2	32.949	286	6	14	2.628e-92	16.4	21.7
1260	10624;10935;11115	IPI00026219	NP_037423	ENSG00000071894;ENSG00000256775	AC233992.8;CPSF1	AC233992.8{cleavage and polyadenylation specificity factor subunit 1 [Source:RefSeq peptide,Acc:NP_037423]};CPSF1{cleavage and polyadenylation specific factor 1, 160kDa [Source:HGNC Symbol,Acc:2324]}	3	3	3	2	3	2	2.1	2.1	2.1	160.88	1443	11	10	1.1822e-15	2.1	0.9
1261	1318;2193;5372;5980;7189;15800;16013;17711;19487;19884	IPI00026230	NP_001027565;NP_001186903;NP_062543	ENSG00000126945	HNRNPH2	HNRNPH2{heterogeneous nuclear ribonucleoprotein H2 (H') [Source:HGNC Symbol,Acc:5042]}	10	3	7	9	1	3	29	29	12	49.263	449	23	61	0	19.4	27.6
1262	2083;4885;5560	IPI00657860	NP_004325	ENSG00000109743	BST1	BST1{bone marrow stromal cell antigen 1 [Source:HGNC Symbol,Acc:1118]}	3	3	3	3	3	3	9	9	9	37.482	333	5	9	1.8049e-06	9	9
1273	4939;7264;11966;16327;18612	IPI00026519	NP_005720	ENSG00000108179	PPIF	PPIF{peptidylprolyl isomerase F [Source:HGNC Symbol,Acc:9259]}	5	3	5	5	3	3	18.4	18.4	12.1	22.04	207	10	35	5.854e-22	18.4	18.4
1279	1072;2766;3655	IPI00026627	NP_008846	ENSG00000102218	RP2	RP2{retinitis pigmentosa 2 (X-linked recessive) [Source:HGNC Symbol,Acc:10274]}	3	3	3	3	3	3	7.4	7.4	7.4	39.641	350	5	13	2.5196e-07	7.4	7.4
1285	3686;6778;15575	IPI00985258	NP_001189488;NP_002019;NP_001189487	ENSG00000125954;ENSG00000257365	FNTB;AL139022.1	FNTB{farnesyltransferase, CAAX box, beta [Source:HGNC Symbol,Acc:3785]};AL139022.1{Protein farnesyltransferase subunit beta [Source:UniProtKB/Swiss-Prot,Acc:P49356]}	3	3	3	2	3	2	3.4	3.4	3.4	56.009	498	13	13	3.916e-07	3.4	3
1298	757;2015;19476	IPI00027032	NP_009191	ENSG00000011009	LYPLA2	LYPLA2{lysophospholipase II [Source:HGNC Symbol,Acc:6738]}	3	3	2	3	2	3	14.7	14.7	14.7	24.737	231	2	5	3.8941e-09	6.9	14.7
1319	4161;13946;19766	IPI00027341	NP_001738	ENSG00000042493	CAPG	CAPG{capping protein (actin filament), gelsolin-like [Source:HGNC Symbol,Acc:1474]}	3	3	3	3	3	3	11.8	11.8	11.8	38.498	348	5	13	1.635e-50	11.8	11.8
1330	5209;18262;18389	IPI00027443	NP_001014437;NP_001181926;NP_001742;NP_644802	ENSG00000110619	CARS	CARS{cysteinyl-tRNA synthetase [Source:HGNC Symbol,Acc:1493]}	3	3	2	2	2	2	4.1	4.1	4.1	94.637	831	6	10	1.6903e-15	2.4	2.6
1334	8439;13420;17809	IPI00027462	NP_002956	ENSG00000163220	S100A9	S100A9{S100 calcium binding protein A9 [Source:HGNC Symbol,Acc:10499]}	3	3	2	3	2	3	37.7	37.7	37.7	13.242	114	2	8	7.136e-32	24.6	37.7
1349	401;5500;9067;18860	IPI00027780	NP_004521;NP_001121363	ENSG00000087245	MMP2	MMP2{matrix metallopeptidase 2 (gelatinase A, 72kDa gelatinase, 72kDa type IV collagenase) [Source:HGNC Symbol,Acc:7166]}	4	3	3	4	2	3	7.6	7.6	6.5	73.881	660	7	10	1.9888e-17	4.7	7.6
1350	17008;18919;18969	IPI01008795	NP_113638;NP_001129107	ENSG00000175573	C11orf68	C11orf68{chromosome 11 open reading frame 68 [Source:HGNC Symbol,Acc:28801]}	3	3	2	3	2	3	11.6	11.6	11.6	31.517	293	4	7	1.1223e-06	7.8	11.6
1361	4720;17190;19968	IPI00028006	NP_001186708;NP_001186709;NP_002785	ENSG00000126067	PSMB2	PSMB2{proteasome (prosome, macropain) subunit, beta type, 2 [Source:HGNC Symbol,Acc:9539]}	3	3	2	3	2	3	14.4	14.4	14.4	22.836	201	21	19	8.5984e-46	10.4	14.4
1379	1043;7454;9164;10271;11950;13413;16583;17134	IPI00028481	NP_005361	ENSG00000167461	RAB8A	RAB8A{RAB8A, member RAS oncogene family [Source:HGNC Symbol,Acc:7007]}	8	3	7	8	2	3	41.1	27.1	19.8	23.668	207	8	21	9.3045e-78	33.8	41.1
1404	10357;15510;18845	IPI00029086	NP_000067;NP_001116102;NP_001116103	ENSG00000129757	CDKN1C	CDKN1C{cyclin-dependent kinase inhibitor 1C (p57, Kip2) [Source:HGNC Symbol,Acc:1786]}	3	3	2	2	2	2	13	13	13	32.177	316	4	2	1.453e-42	8.9	9.2
1414	259;4256;8451	IPI00029403	NP_003785	ENSG00000114520	SNX4	SNX4{sorting nexin 4 [Source:HGNC Symbol,Acc:11175]}	3	3	3	3	3	3	5.8	5.8	5.8	51.908	450	6	6	3.1359e-06	5.8	5.8
1419	2906;11009;11690	IPI00029534	NP_002694	ENSG00000128059	PPAT	PPAT{phosphoribosyl pyrophosphate amidotransferase [Source:HGNC Symbol,Acc:9238]}	3	3	2	2	2	2	6.4	6.4	6.4	57.398	517	2	3	1.3242e-19	4.4	4.4
1421	2504;8664;17147	IPI00029558	NP_004540;NP_001190984	ENSG00000151366	NDUFC2	NDUFC2{NADH dehydrogenase (ubiquinone) 1, subcomplex unknown, 2, 14.5kDa [Source:HGNC Symbol,Acc:7706]}	3	3	3	3	3	3	24.4	24.4	24.4	14.187	119	7	10	1.7841e-09	24.4	24.4
1430	2967;3543;14504	IPI00029658	NP_001034437;NP_001034438	ENSG00000115380	EFEMP1	EFEMP1{EGF containing fibulin-like extracellular matrix protein 1 [Source:HGNC Symbol,Acc:3218]}	3	3	3	2	3	2	7.1	7.1	7.1	54.64	493	6	15	6.2268e-12	7.1	4.5
1431	5783;6230;10420	IPI00029665	NP_443077	ENSG00000139428	MMAB	MMAB{methylmalonic aciduria (cobalamin deficiency) cblB type [Source:HGNC Symbol,Acc:19331]}	3	3	3	3	3	3	14.4	14.4	14.4	27.388	250	5	11	3.8889e-18	14.4	14.4
1433	7855;10459;17155	IPI00029723	NP_009016	ENSG00000163430	FSTL1	FSTL1{follistatin-like 1 [Source:HGNC Symbol,Acc:3972]}	3	3	2	3	2	3	8.4	8.4	8.4	34.985	308	3	8	8.0587e-08	5.8	8.4
1444	7683;9492;11031	IPI00029997	NP_036220	ENSG00000130313	PGLS	PGLS{6-phosphogluconolactonase [Source:HGNC Symbol,Acc:8903]}	3	3	1	3	1	3	13.2	13.2	13.2	27.547	258	2	3	1.4268e-11	5.8	13.2
1457	103;740;8909	IPI00218729	NP_004078;NP_001091894;NP_001191315	ENSG00000075711	DLG1	DLG1{discs, large homolog 1 (Drosophila) [Source:HGNC Symbol,Acc:2900]}	3	3	0	3	0	3	3.2	3.2	3.2	103.32	926		8	8.5077e-08	0	3.2
1461	12158;13058;16634	IPI00030399	NP_004321	ENSG00000140299	BNIP2	BNIP2{BCL2/adenovirus E1B 19kDa interacting protein 2 [Source:HGNC Symbol,Acc:1083]}	3	3	3	3	3	3	5.1	5.1	5.1	48.844	435	12	10	6.5611e-05	5.1	5.1
1467	4709;6958;11366	IPI00030782	NP_001171549;NP_001171550;NP_001171551;NP_001171552;NP_003144	ENSG00000166888	STAT6	STAT6{signal transducer and activator of transcription 6, interleukin-4 induced [Source:HGNC Symbol,Acc:11368]}	3	3	3	2	3	2	3	3	3	94.134	847	8	7	4.2581e-07	3	1.8
1474	199;5155;14293	IPI00031023	NP_002009	ENSG00000177731	FLII	FLII{flightless I homolog (Drosophila) [Source:HGNC Symbol,Acc:3750]}	3	3	3	3	3	3	2.4	2.4	2.4	144.75	1269	12	9	7.4154e-21	2.4	2.4
1482	4850;8432;13894;19077	IPI00031357	NP_000300;NP_001116236	ENSG00000143224	PPOX	PPOX{protoporphyrinogen oxidase [Source:HGNC Symbol,Acc:9280]}	4	3	4	4	3	3	7.8	7.8	6.5	50.765	477	10	18	1.1773e-24	7.8	7.8
1496	3509;8217;13319	IPI00031556	NP_009210;NP_001012496	ENSG00000063244	U2AF2	U2AF2{U2 small nuclear RNA auxiliary factor 2 [Source:HGNC Symbol,Acc:23156]}	3	3	3	3	3	3	7.2	7.2	7.2	53.5	475	14	27	9.1048e-52	7.2	7.2
1504	4963;9576;15935	IPI00031655	NP_115729	ENSG00000131475	VPS25	VPS25{vacuolar protein sorting 25 homolog (S. cerevisiae) [Source:HGNC Symbol,Acc:28122]}	3	3	3	3	3	3	17	17	17	20.747	176	10	11	2.3338e-09	17	17
1505	692;8179;14612	IPI00031661	NP_076983	ENSG00000184967	NOC4L	NOC4L{nucleolar complex associated 4 homolog (S. cerevisiae) [Source:HGNC Symbol,Acc:28461]}	3	3	3	3	3	3	6	6	6	58.467	516	5	4	3.3611e-44	6	6
1519	2419;7274;15621	IPI00031820	NP_004452	ENSG00000179115	FARSA	FARSA{phenylalanyl-tRNA synthetase, alpha subunit [Source:HGNC Symbol,Acc:3592]}	3	3	3	2	3	2	8.3	8.3	8.3	57.563	508	6	6	2.286e-30	8.3	5.5
1520	9420;10467;16181	IPI00031822	NP_066918	ENSG00000138074	SLC5A6	SLC5A6{solute carrier family 5 (sodium-dependent vitamin transporter), member 6 [Source:HGNC Symbol,Acc:11041]}	3	3	3	3	3	3	6.5	6.5	6.5	68.641	635	4	7	1.7059e-17	6.5	6.5
1522	10760;11320;12260	IPI00031960	NP_056240	ENSG00000068654	POLR1A	POLR1A{polymerase (RNA) I polypeptide A, 194kDa [Source:HGNC Symbol,Acc:17264]}	3	3	3	2	3	2	2	2	2	194.81	1720	5	3	5.1585e-09	2	1
1533	14830;15438;18833;19779	IPI00386189	NP_476516	ENSG00000164134	NAA15	NAA15{N(alpha)-acetyltransferase 15, NatA auxiliary subunit [Source:HGNC Symbol,Acc:30782]}	4	3	4	3	3	3	5.2	5.2	3.7	101.27	866	7	5	8.8136e-09	5.2	3.7
1537	5717;10732;17589;19401	IPI00032291	NP_001726	ENSG00000106804	C5	C5{complement component 5 [Source:HGNC Symbol,Acc:1331]}	4	3	4	4	3	3	2.3	2.3	1.5	188.3	1676	9	9	3.5281e-11	2.3	2.3
1543	7084;8223;11270	IPI00514619	NP_057039;NP_001131074	ENSG00000162959	MEMO1	MEMO1{mediator of cell motility 1 [Source:HGNC Symbol,Acc:14014]}	3	3	3	3	3	3	12	12	12	34.293	300	18	12	5.7496e-25	12	12
1544	4391;10476;18065	IPI00032459	NP_036227;NP_996895	ENSG00000185009	AP3M1	AP3M1{adaptor-related protein complex 3, mu 1 subunit [Source:HGNC Symbol,Acc:569]}	3	3	1	3	1	3	7.4	7.4	7.4	46.939	418	3	5	6.2005e-11	3.6	7.4
1546	7695;8726;12013	IPI00032466	NP_002241	ENSG00000104783	KCNN4	KCNN4{potassium intermediate/small conductance calcium-activated channel, subfamily N, member 4 [Source:HGNC Symbol,Acc:6293]}	3	3	2	2	2	2	5.9	5.9	5.9	47.695	427	4	4	1.0858e-08	5.9	2.3
1559	774;5478;19938	IPI00032851	NP_057141	ENSG00000111481	COPZ1	COPZ1{coatomer protein complex, subunit zeta 1 [Source:HGNC Symbol,Acc:2243]}	3	3	1	3	1	3	22.6	22.6	22.6	20.198	177	3	12	9.0161e-42	6.2	22.6
1562	334;1102;8311	IPI00032881	NP_057154	ENSG00000181610	MRPS23	MRPS23{mitochondrial ribosomal protein S23 [Source:HGNC Symbol,Acc:14509]}	3	3	2	3	2	3	15.3	15.3	15.3	21.77	190	4	6	3.0063e-20	11.6	15.3
1568	15585;18624;19860	IPI00032970	NP_073613	ENSG00000144909	OSBPL11	OSBPL11{oxysterol binding protein-like 11 [Source:HGNC Symbol,Acc:16397]}	3	3	3	2	3	2	4.6	4.6	4.6	83.642	747	4	4	2.7947e-07	4.6	2.8
1569	1644;9087;17399	IPI00032995	NP_061167	ENSG00000132434	LANCL2	LANCL2{LanC lantibiotic synthetase component C-like 2 (bacterial) [Source:HGNC Symbol,Acc:6509]}	3	3	2	2	2	2	7.6	7.6	7.6	50.854	450	3	5	1.4443e-36	3.6	6
1572	1016;8177;19616	IPI00033030	NP_008933;NP_783163	ENSG00000130706	ADRM1	ADRM1{adhesion regulating molecule 1 [Source:HGNC Symbol,Acc:15759]}	3	3	1	3	1	3	6.4	6.4	6.4	42.153	407	22	23	2.9681e-16	2.2	6.4
1574	12973;14114;16157	IPI00791049	NP_066983;NP_001170986	ENSG00000224552;ENSG00000230475;ENSG00000231488;ENSG00000235676;ENSG00000236063;ENSG00000204427;ENSG00000206403	ABHD16A	ABHD16A{abhydrolase domain containing 16A [Source:HGNC Symbol,Acc:13921]}	3	3	3	2	3	2	6.2	6.2	6.2	67.518	601	4	6	4.1363e-10	6.2	4.3
1577	1540;15051;15119	IPI00033153	NP_006353	ENSG00000162231	NXF1	NXF1{nuclear RNA export factor 1 [Source:HGNC Symbol,Acc:8071]}	3	3	3	3	3	3	5	5	5	70.182	619	6	9	3.2464e-17	5	5
1578	1147;2882;12452	IPI00033217	NP_005754	ENSG00000008311	AASS	AASS{aminoadipate-semialdehyde synthase [Source:HGNC Symbol,Acc:17366]}	3	3	3	2	3	2	4.4	4.4	4.4	102.13	926	6	3	1.6135e-16	4.4	3.2
1579	1362;1914;2836;2904;3510;5096;6156;11796	IPI00604523	NP_006462;NP_001138416;NP_001138417;NP_291024	ENSG00000101608;ENSG00000118680	MYL12A;MYL12B	MYL12A{myosin, light chain 12A, regulatory, non-sarcomeric [Source:HGNC Symbol,Acc:16701]};MYL12B{myosin, light chain 12B, regulatory [Source:HGNC Symbol,Acc:29827]}	8	3	7	8	3	3	46.9	46.9	12.4	20.457	177	53	96	1.3053e-171	43.5	46.9
1592	9675;13744;14821	IPI00550682	NP_036335	ENSG00000137106	GRHPR	GRHPR{glyoxylate reductase/hydroxypyruvate reductase [Source:HGNC Symbol,Acc:4570]}	3	3	3	3	3	3	10	10	10	36.824	341	5	13	1.4339e-64	10	10
1594	255;2130;14311	IPI00038378	NP_067027	ENSG00000145293	ENOPH1	ENOPH1{enolase-phosphatase 1 [Source:HGNC Symbol,Acc:24599]}	3	3	3	3	3	3	12.3	12.3	12.3	28.932	261	4	7	1.4804e-12	12.3	12.3
1620	4553;11574;19973	IPI00059292	NP_060518;NP_002361	ENSG00000111196;ENSG00000162385	MAGOHB;MAGOH	MAGOHB{mago-nashi homolog B (Drosophila) [Source:HGNC Symbol,Acc:25504]};MAGOH{mago-nashi homolog, proliferation-associated (Drosophila) [Source:HGNC Symbol,Acc:6815]}	3	3	3	2	3	2	18.9	18.9	18.9	17.276	148	6	3	3.0133e-05	18.9	8.8
1632	7402;7993;18949	IPI00072044	NP_054758	ENSG00000182919	C11orf54	C11orf54{chromosome 11 open reading frame 54 [Source:HGNC Symbol,Acc:30204]}	3	3	3	2	3	2	10.8	10.8	10.8	35.117	315	11	12	2.0307e-34	10.8	7.9
1641	167;2146;6300;6327;13406;14472	IPI00219774	NP_004148	ENSG00000114302	PRKAR2A	PRKAR2A{protein kinase, cAMP-dependent, regulatory, type II, alpha [Source:HGNC Symbol,Acc:9391]}	6	3	5	5	2	2	21.3	21.3	12.6	45.518	404	9	18	0	17.8	17.1
1645	1387;5072;5078	IPI00063827	NP_001139786;NP_116139	ENSG00000114779	ABHD14B	ABHD14B{abhydrolase domain containing 14B [Source:HGNC Symbol,Acc:28235]}	3	3	2	3	2	3	17.6	17.6	17.6	22.345	210	8	10	1.1023e-96	11.4	17.6
1661	2247;12084;13429	IPI00072224	NP_068749	ENSG00000135249	RINT1	RINT1{RAD50 interactor 1 [Source:HGNC Symbol,Acc:21876]}	3	3	3	3	3	3	3.7	3.7	3.7	90.631	792	8	4	8.6135e-10	3.7	3.7
1667	10060;13466;15732	IPI00073779	NP_068593	ENSG00000061794	MRPS35	MRPS35{mitochondrial ribosomal protein S35 [Source:HGNC Symbol,Acc:16635]}	3	3	2	3	2	3	13	13	13	36.844	323	6	5	8.7802e-32	9	13
1681	3125;3561;13340	IPI00099996	NP_060289	ENSG00000174173	RG9MTD1	RG9MTD1{RNA (guanine-9-) methyltransferase domain containing 1 [Source:HGNC Symbol,Acc:26022]}	3	3	3	2	3	2	7.4	7.4	7.4	47.346	403	8	7	2.5784e-15	7.4	3.2
1685	6248;7652;19168	IPI00654582	NP_061882	ENSG00000078902	TOLLIP	TOLLIP{toll interacting protein [Source:HGNC Symbol,Acc:16476]}	3	3	2	3	2	3	9.7	9.7	9.7	38.894	352	7	10	5.0624e-13	6	9.7
1693	698;14569;15079	IPI00100748	NP_001123578;NP_036399	ENSG00000133265	HSPBP1	HSPBP1{HSPA (heat shock 70kDa) binding protein, cytoplasmic cochaperone 1 [Source:HGNC Symbol,Acc:24989]}	3	3	3	3	3	3	9.4	9.4	9.4	44.483	405	21	9	1.2873e-13	9.4	9.4
1697	1067;10353;16152	IPI00101186	NP_055994;NP_001138586	ENSG00000052749	RRP12	RRP12{ribosomal RNA processing 12 homolog (S. cerevisiae) [Source:HGNC Symbol,Acc:29100]}	3	3	3	2	3	2	2.5	2.5	2.5	143.7	1297	10	11	3.9775e-21	2.5	1.5
1709	898;4957;15409	IPI00102685	NP_001018654;NP_001018655;NP_001018656;NP_001018657;NP_612382	ENSG00000179820	MYADM	MYADM{myeloid-associated differentiation marker [Source:HGNC Symbol,Acc:7544]}	3	3	2	3	2	3	8.4	8.4	8.4	35.273	322	8	11	4.5622e-11	5.3	8.4
1732	2815;5513;11203	IPI00759642	NP_981961;NP_004235	ENSG00000177575	CD163	CD163{CD163 molecule [Source:HGNC Symbol,Acc:1631]}	3	3	2	3	2	3	3.7	3.7	3.7	125.98	1161	4	8	8.3343e-23	2.2	3.7
1735	8194;15849;16767	IPI00106491	NP_057267	ENSG00000053372	MRTO4	MRTO4{mRNA turnover 4 homolog (S. cerevisiae) [Source:HGNC Symbol,Acc:18477]}	3	3	3	2	3	2	15.1	15.1	15.1	27.56	239	8	6	8.6006e-22	15.1	8.8
1744	7231;11281;15001	IPI00106966	NP_060336	ENSG00000175606	TMEM70	TMEM70{transmembrane protein 70 [Source:HGNC Symbol,Acc:26050]}	3	3	2	3	2	3	11.9	11.9	11.9	28.969	260	2	7	1.0821e-07	7.7	11.9
1748	16064;17225;18390	IPI00107357	NP_001186397;NP_001285	ENSG00000104853	CLPTM1	CLPTM1{cleft lip and palate associated transmembrane protein 1 [Source:HGNC Symbol,Acc:2087]}	3	3	2	3	2	3	3.6	3.6	3.6	77.958	686	18	20	1.3366e-31	2.6	3.6
1757	930;7625;18835	IPI00419891	NP_689753	ENSG00000184178	SCFD2	SCFD2{sec1 family domain containing 2 [Source:HGNC Symbol,Acc:30676]}	3	3	3	3	3	3	4.4	4.4	4.4	75.126	684	9	5	2.3841e-13	4.4	4.4
1763	13839;15034;18118;19761	IPI00413160	NP_001034230;NP_008963	ENSG00000100106	TRIOBP	TRIOBP{TRIO and F-actin binding protein [Source:HGNC Symbol,Acc:17009]}	4	3	4	3	3	2	1.8	1.4	1.4	261.37	2365	3	3	8.003e-15	1.8	1.3
1767	11186;11210;11215	IPI00150269	NP_004688	ENSG00000136875	PRPF4	PRPF4{PRP4 pre-mRNA processing factor 4 homolog (yeast) [Source:HGNC Symbol,Acc:17349]}	3	3	3	3	3	3	6.7	6.7	6.7	58.449	522	11	19	9.94e-16	6.7	6.7
1772	1629;4557;4731	IPI00152303	NP_001139730;NP_079055;NP_001139731	ENSG00000166908	PIP4K2C	PIP4K2C{phosphatidylinositol-5-phosphate 4-kinase, type II, gamma [Source:HGNC Symbol,Acc:23786]}	3	3	3	3	3	3	8.6	8.6	8.6	47.299	421	5	6	4.5705e-07	8.6	8.6
1784	4047;5531;10097	IPI00154451	NP_071757	ENSG00000155229	MMS19	MMS19{MMS19 nucleotide excision repair homolog (S. cerevisiae) [Source:HGNC Symbol,Acc:13824]}	3	3	2	2	2	2	3.9	3.9	3.9	115.75	1051	13	6	2.5004e-13	2.9	2.5
1785	6030;15324;19721	IPI00945964	NP_079272	ENSG00000168827	GFM1	GFM1{G elongation factor, mitochondrial 1 [Source:HGNC Symbol,Acc:13780]}	3	3	2	3	2	3	4.2	4.2	4.2	85.868	770	10	18	8.7084e-12	3	4.2
1794	9954;10413;12860	IPI00303868	NP_002094;NP_001155059	ENSG00000104812	GYS1	GYS1{glycogen synthase 1 (muscle) [Source:HGNC Symbol,Acc:4706]}	3	3	3	3	3	3	3.4	3.4	3.4	83.785	737	5	3	5.368e-06	3.4	3.4
1799	2924;3014;12651	IPI00220566	NP_006431	ENSG00000184470	TXNRD2	TXNRD2{thioredoxin reductase 2 [Source:HGNC Symbol,Acc:18155]}	3	3	2	3	2	3	10.5	10.5	10.5	56.459	524	2	4	3.1876e-29	8.6	10.5
1800	4694;10982;15517	IPI00900366	NP_001009814;NP_055873	ENSG00000102763	KIAA0564	KIAA0564{KIAA0564 [Source:HGNC Symbol,Acc:29071]}	3	3	3	3	3	3	1.5	1.5	1.5	214.82	1905	8	5	7.445e-14	1.5	1.5
1803	4762;5556;10387	IPI00455153	NP_001002755;NP_001002756;NP_001002757;NP_056515	ENSG00000169599	NFU1	NFU1{NFU1 iron-sulfur cluster scaffold homolog (S. cerevisiae) [Source:HGNC Symbol,Acc:16287]}	3	3	2	3	2	3	14.2	14.2	14.2	28.462	254	2	12	1.5613e-29	10.2	14.2
1804	12838;15844;18737	IPI00162330	NP_057575	ENSG00000116221	MRPL37	MRPL37{mitochondrial ribosomal protein L37 [Source:HGNC Symbol,Acc:14034]}	3	3	1	3	1	3	8.3	8.3	8.3	48.117	423	8	10	2.4482e-12	2.1	8.3
1811	8150;15593;19160	IPI00163644	NP_001003712;NP_065892	ENSG00000091039	OSBPL8	OSBPL8{oxysterol binding protein-like 8 [Source:HGNC Symbol,Acc:16396]}	3	3	3	3	3	3	3.4	3.4	3.4	101.3	890	11	9	2.1233e-12	3.4	3.4
1814	2259;8761;11719	IPI00164018	NP_085125	ENSG00000167600	CYP2S1	CYP2S1{cytochrome P450, family 2, subfamily S, polypeptide 1 [Source:HGNC Symbol,Acc:15654]}	3	3	3	1	3	1	5	5	5	62.23	564	19	22	1.2932e-10	5	2
1823	8006;8447;16961	IPI00165092	NP_001035526	ENSG00000139131	YARS2	YARS2{tyrosyl-tRNA synthetase 2, mitochondrial [Source:HGNC Symbol,Acc:24249]}	3	3	3	2	3	2	8.2	8.2	8.2	53.198	477	6	4	8.6478e-66	8.2	5.7
1833	8618;10183;10391	IPI00165651	NP_057654	ENSG00000087502	ERGIC2	ERGIC2{ERGIC and golgi 2 [Source:HGNC Symbol,Acc:30208]}	3	3	2	3	2	3	9	9	9	43.494	387	2	4	4.1426e-06	5.7	9
1850	7042;14839;18341	IPI00166865	NP_001008389	ENSG00000145354	CISD2	CISD2{CDGSH iron sulfur domain 2 [Source:HGNC Symbol,Acc:24212]}	3	3	3	3	3	3	26.7	26.7	26.7	15.278	135	3	7	2.3849e-06	26.7	26.7
1859	8867;15048;19756	IPI00168336	NP_001137416;NP_851853	ENSG00000161904	LEMD2	LEMD2{LEM domain containing 2 [Source:HGNC Symbol,Acc:21244]}	3	3	2	3	2	3	7.8	7.8	7.8	56.974	503	11	12	3.8838e-39	5.6	7.8
1860	2538;11332;18155	IPI00168407	NP_060460	ENSG00000090857	PDPR	PDPR{pyruvate dehydrogenase phosphatase regulatory subunit [Source:HGNC Symbol,Acc:30264]}	3	3	3	2	3	2	4	4	4	99.363	879	3	4	1.4684e-15	4	2.6
1863	4103;7612;17908	IPI00168565	NP_060093;NP_951060	ENSG00000168763	CNNM3	CNNM3{cyclin M3 [Source:HGNC Symbol,Acc:104]}	3	3	0	3	0	3	3.7	3.7	3.7	76.118	707		5	4.5757e-05	0	3.7
1868	9580;11187;15115	IPI00169325	NP_644810	ENSG00000134987	WDR36	WDR36{WD repeat domain 36 [Source:HGNC Symbol,Acc:30696]}	3	3	3	3	3	3	3.8	3.8	3.8	105.32	951	23	17	2.3524e-21	3.8	3.8
1888	1628;8942;17983	IPI00171421	NP_057731	ENSG00000130193	C8orf55	C8orf55{chromosome 8 open reading frame 55 [Source:HGNC Symbol,Acc:29656]}	3	3	2	3	2	3	15.4	15.4	15.4	23.865	208	3	4	8.2463e-12	11.5	15.4
1893	10366;10993;14586	IPI00171573	NP_612366	ENSG00000156026	CCDC109A	CCDC109A{coiled-coil domain containing 109A [Source:HGNC Symbol,Acc:23526]}	3	3	3	3	3	3	9.7	9.7	9.7	39.866	351	10	14	4.1409e-09	9.7	9.7
1894	2216;3345;12064;12315;12360;15040;15112;16005;18514;18515;19796	IPI00465070	NP_003520;NP_003521;NP_003522;NP_003523;NP_003524;NP_003525;NP_003526;NP_003527;NP_003528;NP_066298;NP_003484;NP_001005464;NP_001116847;NP_066403;NP_002098;NP_005315;NP_001013721	ENSG00000124693;ENSG00000182572;ENSG00000196532;ENSG00000196966;ENSG00000197153;ENSG00000197409;ENSG00000198366;ENSG00000203813;ENSG00000256018;ENSG00000256316;ENSG00000168148;ENSG00000183598;ENSG00000203811;ENSG00000203852;ENSG00000132475;ENSG00000163041;ENSG00000188375	HIST1H3A;HIST1H3B;HIST1H3C;HIST1H3D;HIST1H3E;HIST1H3F;HIST1H3G;HIST1H3H;HIST1H3I;HIST1H3J;HIST3H3;HIST2H3D;HIST2H3C;HIST2H3A;H3F3A;H3F3B;H3F3C	HIST1H3A{histone cluster 1, H3a [Source:HGNC Symbol,Acc:4766]};HIST1H3B{histone cluster 1, H3b [Source:HGNC Symbol,Acc:4776]};HIST1H3C{histone cluster 1, H3c [Source:HGNC Symbol,Acc:4768]};HIST1H3D{histone cluster 1, H3d [Source:HGNC Symbol,Acc:4767]};HIST1H3E{histone cluster 1, H3e [Source:HGNC Symbol,Acc:4769]};HIST1H3F{histone cluster 1, H3f [Source:HGNC Symbol,Acc:4773]};HIST1H3G{histone clus…	11	3	8	11	2	3	42.6	42.6	14	15.404	136	86	152	9.0556e-39	37.5	42.6
1903	2179;5098;5234;19058	IPI00965234	NP_742112;NP_742127;NP_001212;NP_742113;NP_742125;NP_742126	ENSG00000145349	CAMK2D	CAMK2D{calcium/calmodulin-dependent protein kinase II delta [Source:HGNC Symbol,Acc:1462]}	4	3	4	3	3	2	7.9	5.6	5.6	60.004	533	16	13	2.2765e-20	7.9	6.2
1906	7899;12245;17002	IPI00174442	NP_056290	ENSG00000119812	FAM98A	FAM98A{family with sequence similarity 98, member A [Source:HGNC Symbol,Acc:24520]}	3	3	2	2	2	2	7.1	7.1	7.1	55.4	519	5	7	3.0877e-23	4.2	4.8
1908	3946;5694;6435	IPI00174962	NP_203744	ENSG00000100139	MICALL1	MICALL1{MICAL-like 1 [Source:HGNC Symbol,Acc:29804]}	3	3	2	3	2	3	4.5	4.5	4.5	93.44	863	4	10	3.4045e-49	3	4.5
1938	3834;11955;12326;15979	IPI00179700	NP_665906;NP_665908	ENSG00000137309	HMGA1	HMGA1{high mobility group AT-hook 1 [Source:HGNC Symbol,Acc:5010]}	4	3	4	4	3	3	48.6	48.6	30.8	11.676	107	9	21	1.4539e-63	48.6	48.6
1952	349;3455;6836	IPI00217421	NP_116023;NP_001188413;NP_690577	ENSG00000165282	PIGO	PIGO{phosphatidylinositol glycan anchor biosynthesis, class O [Source:HGNC Symbol,Acc:23215]}	3	3	2	3	2	3	2.8	2.8	2.8	118.7	1089	11	9	7.5996e-16	1.9	2.8
1957	9470;11119;18466	IPI00922428	NP_009201	ENSG00000122642	FKBP9	FKBP9{FK506 binding protein 9, 63 kDa [Source:HGNC Symbol,Acc:3725]}	3	3	3	3	3	3	6.1	6.1	6.1	69.154	623	6	8	7.7358e-24	6.1	6.1
1958	2100;2101;5779	IPI00182289	NP_001023	ENSG00000213741	RPS29	RPS29{ribosomal protein S29 [Source:HGNC Symbol,Acc:10419]}	3	3	2	3	2	3	33.9	33.9	33.9	6.6767	56	23	33	1.8851e-103	33.9	33.9
1970	3019;7131;8933;19428	IPI00183508	NP_002813	ENSG00000151239	TWF1	TWF1{twinfilin, actin-binding protein, homolog 1 (Drosophila) [Source:HGNC Symbol,Acc:9620]}	4	3	3	4	2	3	9.4	9.4	7.6	43.917	384	11	18	3.0127e-11	7.6	9.4
1988	317;1063;2134	IPI00220609	NP_001013455;NP_112493	ENSG00000085415	SEH1L	SEH1L{SEH1-like (S. cerevisiae) [Source:HGNC Symbol,Acc:30379]}	3	3	2	3	2	3	10.2	10.2	10.2	46.578	421	4	5	2.9098e-37	8.3	10.2
2000	1092;9458;16825	IPI00215719	NP_000970	ENSG00000063177	RPL18	RPL18{ribosomal protein L18 [Source:HGNC Symbol,Acc:10310]}	3	3	3	3	3	3	19.7	19.7	19.7	21.634	188	14	20	1.5625e-32	19.7	19.7
2020	8432;13061;14441;18178	IPI00215998	NP_001771;NP_001035123	ENSG00000135404	CD63	CD63{CD63 molecule [Source:HGNC Symbol,Acc:1692]}	4	3	4	4	3	3	12.6	10.1	10.1	25.636	238	4	22	1.6334e-19	12.6	12.6
2021	3871;16750;18824	IPI00216003	NP_003469	ENSG00000166266	CUL5	CUL5{cullin 5 [Source:HGNC Symbol,Acc:2556]}	3	3	3	3	3	3	3.6	3.6	3.6	96.725	837	17	12	7.977e-09	3.6	3.6
2039	2551;2832;3895;7395;13486;18037;19462	IPI00216319	NP_003396	ENSG00000128245	YWHAH	YWHAH{tyrosine 3-monooxygenase/tryptophan 5-monooxygenase activation protein, eta polypeptide [Source:HGNC Symbol,Acc:12853]}	7	3	6	7	2	3	24.4	11	11	28.218	246	2	13	7.4049e-32	20.3	24.4
2045	2370;15063;19759	IPI00009203	NP_057060;NP_689424	ENSG00000162627	SNX7	SNX7{sorting nexin 7 [Source:HGNC Symbol,Acc:14971]}	3	3	3	2	3	2	6.7	6.7	6.7	51.619	451	7	3	5.1963e-05	6.7	2
2054	849;1712;4079;4638;6926;7137;11960;17712;19124	IPI00914949	NP_001020029;NP_000338	ENSG00000070182	SPTB	SPTB{spectrin, beta, erythrocytic [Source:HGNC Symbol,Acc:11274]}	9	3	7	9	3	3	4	1.4	1.4	268.24	2332	9	9	2.9749e-23	3.2	4
2062	47;6310;7195	IPI00217007	NP_612355	ENSG00000116685	KIAA2013	KIAA2013{KIAA2013 [Source:HGNC Symbol,Acc:28513]}	3	3	2	3	2	3	4	4	4	72.68	667	9	11	1.1887e-19	2.7	4
2071	10360;11307;13799	IPI00746183	NP_001035787;NP_060784	ENSG00000151116	UEVLD	UEVLD{UEV and lactate/malate dehyrogenase domains [Source:HGNC Symbol,Acc:30866]}	3	3	3	2	3	2	7	7	7	52.263	471	7	5	2.0483e-07	7	4.9
2073	4832;13537;18164	IPI00217357	NP_060707	ENSG00000060339	CCAR1	CCAR1{cell division cycle and apoptosis regulator 1 [Source:HGNC Symbol,Acc:24236]}	3	3	1	3	1	3	3	3	3	132.82	1150	2	4	4.488e-06	1.2	3
2076	101;590;1244;6411;6429;11443;11468;12200;12205;12458;15396	IPI00217466	NP_005311	ENSG00000124575	HIST1H1D	HIST1H1D{histone cluster 1, H1d [Source:HGNC Symbol,Acc:4717]}	11	3	7	11	1	3	38	12.2	12.2	22.35	221	1	23	4.3969e-87	26.7	38
2077	100;590;971;1244;6411;6429;11392;11443;11468;11474;12194;12200;15396	IPI00217467	NP_005312	ENSG00000168298	HIST1H1E	HIST1H1E{histone cluster 1, H1e [Source:HGNC Symbol,Acc:4718]}	13	3	10	12	3	2	39.7	39.7	12.3	21.865	219	38	113	2.2033e-103	39.7	38.8
2086	3766;5885;8272	IPI00217553	NP_115866	ENSG00000182154	MRPL41	MRPL41{mitochondrial ribosomal protein L41 [Source:HGNC Symbol,Acc:14492]}	3	3	3	2	3	2	23.4	23.4	23.4	15.383	137	7	10	5.6488e-11	23.4	12.4
2100	192;4668;11349	IPI00217882	NP_002950	ENSG00000134243	SORT1	SORT1{sortilin 1 [Source:HGNC Symbol,Acc:11186]}	3	3	3	3	3	3	4	4	4	92.067	831	7	8	9.0695e-22	4	4
2111	577;3420;6717;7669;8120;9705;11061;11272;19732;19793	IPI00218236	NP_002700;NP_996759	ENSG00000213639	PPP1CB	PPP1CB{protein phosphatase 1, catalytic subunit, beta isozyme [Source:HGNC Symbol,Acc:9282]}	10	3	10	10	3	3	36.1	12.2	12.2	37.186	327	5	9	3.5006e-131	36.1	36.1
2134	5406;16746;18700	IPI00218733	NP_000445	ENSG00000142168	SOD1	SOD1{superoxide dismutase 1, soluble [Source:HGNC Symbol,Acc:11179]}	3	3	3	3	3	3	17.5	17.5	17.5	15.936	154	7	21	1.4067e-43	17.5	17.5
2137	1534;8413;16160	IPI00218784	NP_001007594;NP_000534	ENSG00000166311	SMPD1	SMPD1{sphingomyelin phosphodiesterase 1, acid lysosomal [Source:HGNC Symbol,Acc:11120]}	3	3	3	3	3	3	5.4	5.4	5.4	69.807	630	9	8	4.2459e-12	5.4	5.4
2142	3560;14422;16457	IPI00218850	NP_005688	ENSG00000140497	SCAMP2	SCAMP2{secretory carrier membrane protein 2 [Source:HGNC Symbol,Acc:10564]}	3	3	1	3	1	3	12.2	12.2	12.2	36.648	329	2	12	4.2978e-34	3.6	12.2
2159	1598;3314;4749	IPI00219111	NP_055109	ENSG00000067167	TRAM1	TRAM1{translocation associated membrane protein 1 [Source:HGNC Symbol,Acc:20568]}	3	3	3	3	3	3	8	8	8	43.071	374	5	10	9.8064e-11	8	8
2190	982;17748;19593	IPI00219682	NP_004090	ENSG00000148175	STOM	STOM{stomatin [Source:HGNC Symbol,Acc:3383]}	3	3	3	3	3	3	11.8	11.8	11.8	31.73	288	3	7	1.7202e-11	11.8	11.8
2206	4704;12181;19425	IPI00219953	NP_057392	ENSG00000162368	CMPK1	CMPK1{cytidine monophosphate (UMP-CMP) kinase 1, cytosolic [Source:HGNC Symbol,Acc:18170]}	3	3	3	3	3	3	14.9	14.9	14.9	25.855	228	9	17	8.9794e-26	14.9	14.9
2210	4217;8101;19862	IPI00220063	NP_001171908;NP_004543	ENSG00000168653	NDUFS5	NDUFS5{NADH dehydrogenase (ubiquinone) Fe-S protein 5, 15kDa (NADH-coenzyme Q reductase) [Source:HGNC Symbol,Acc:7712]}	3	3	3	2	3	2	33	33	33	12.517	106	6	2	6.6165e-15	33	21.7
2228	7345;12634;16156	IPI00220487	NP_006347;NP_001003785	ENSG00000167863	ATP5H	ATP5H{ATP synthase, H+ transporting, mitochondrial Fo complex, subunit d [Source:HGNC Symbol,Acc:845]}	3	3	2	3	2	3	24.2	24.2	24.2	18.491	161	4	7	1.0081e-47	18.6	24.2
2234	1379;1603;2551;3889;7395;13486;18037;19226	IPI00220642	NP_036611	ENSG00000170027	YWHAG	YWHAG{tyrosine 3-monooxygenase/tryptophan 5-monooxygenase activation protein, gamma polypeptide [Source:HGNC Symbol,Acc:12852]}	8	3	7	8	2	3	27.1	10.1	10.1	28.302	247	2	10	1.9835e-41	23.5	27.1
2240	6194;8182;9094	IPI00646015	NP_001032248;NP_001028755	ENSG00000123130	ACOT9	ACOT9{acyl-CoA thioesterase 9 [Source:HGNC Symbol,Acc:17152]}	3	3	3	2	3	2	8	8	8	50.85	448	15	12	5.1514e-08	8	3.6
2242	7552;10148;14358;15924	IPI00220741	NP_003117	ENSG00000163554	SPTA1	SPTA1{spectrin, alpha, erythrocytic 1 (elliptocytosis 2) [Source:HGNC Symbol,Acc:11272]}	4	3	3	4	2	3	1.7	1.4	1.4	280.01	2419	2	9	9.3274e-11	1	1.7
2266	693;7863;9782	IPI00221394	NP_001135935;NP_001354	ENSG00000130826	DKC1	DKC1{dyskeratosis congenita 1, dyskerin [Source:HGNC Symbol,Acc:2890]}	3	3	3	1	3	1	7.6	7.6	7.6	57.673	514	5	4	1.7554e-48	7.6	1.6
2274	2196;4258;12892;16728	IPI00290110	NP_001186421;NP_055271;NP_663314	ENSG00000150593	PDCD4	PDCD4{programmed cell death 4 (neoplastic transformation inhibitor) [Source:HGNC Symbol,Acc:8763]}	4	3	4	2	3	1	12.2	12.2	10.7	51.735	469	10	5	2.2052e-134	12.2	3.8
2276	850;5042;5242	IPI00241860	NP_005923	ENSG00000027001	MIPEP	MIPEP{mitochondrial intermediate peptidase [Source:HGNC Symbol,Acc:7104]}	3	3	3	2	3	2	4.6	4.6	4.6	80.64	713	5	5	4.1193e-07	4.6	3.5
2294	4997;5991;10977;12218;13122;13171;15915;17581	IPI00883655	NP_001184222;NP_001377	ENSG00000092964	DPYSL2	DPYSL2{dihydropyrimidinase-like 2 [Source:HGNC Symbol,Acc:3014]}	8	3	6	8	2	3	13.4	4.7	4.7	73.502	677	8	8	5.303e-94	9.5	13.4
2305	2262;5108;11525;14831	IPI00289535	NP_004270	ENSG00000105819	PMPCB	PMPCB{peptidase (mitochondrial processing) beta [Source:HGNC Symbol,Acc:9119]}	4	3	3	4	3	3	5.9	4.5	4.5	54.191	490	6	6	1.1616e-14	4.5	5.9
2310	8597;10326;15406	IPI00289807	NP_886552	ENSG00000072756	TRNT1	TRNT1{tRNA nucleotidyl transferase, CCA-adding, 1 [Source:HGNC Symbol,Acc:17341]}	3	3	3	3	3	3	9.7	9.7	9.7	50.127	434	4	6	7.4442e-10	9.7	9.7
2319	1765;4025;14789	IPI00290461	NP_003749	ENSG00000104131	EIF3J	EIF3J{eukaryotic translation initiation factor 3, subunit J [Source:HGNC Symbol,Acc:3270]}	3	3	1	3	1	3	14.3	14.3	14.3	29.062	258	2	11	1.3461e-14	3.5	14.3
2324	2360;8988;13276	IPI00411705	NP_065189;NP_001120954	ENSG00000123178	C13orf1	C13orf1{chromosome 13 open reading frame 1 [Source:HGNC Symbol,Acc:14297]}	3	3	1	3	1	3	14.3	14.3	14.3	21.666	196	1	9	6.7332e-08	4.1	14.3
2325	5911;9080;9163;17576	IPI00290928	NP_006563	ENSG00000120063	GNA13	GNA13{guanine nucleotide binding protein (G protein), alpha 13 [Source:HGNC Symbol,Acc:4381]}	4	3	4	4	3	3	10.9	8	8	44.049	377	13	14	3.5544e-21	10.9	10.9
2332	10121;11882;15456	IPI00291215	NP_060024	ENSG00000173193	PARP14	PARP14{poly (ADP-ribose) polymerase family, member 14 [Source:HGNC Symbol,Acc:29232]}	3	3	3	2	3	2	2.1	2.1	2.1	202.8	1801	8	3	2.1729e-24	2.1	1.1
2338	1573;7898;11170	IPI00291412	NP_055449	ENSG00000100034	PPM1F	PPM1F{protein phosphatase, Mg2+/Mn2+ dependent, 1F [Source:HGNC Symbol,Acc:19388]}	3	3	3	3	3	3	9	9	9	49.83	454	6	5	1.3062e-32	9	9
2341	3447;4742;5977	IPI00291544	NP_003120	ENSG00000104549	SQLE	SQLE{squalene epoxidase [Source:HGNC Symbol,Acc:11279]}	3	3	3	3	3	3	6.4	6.4	6.4	63.922	574	7	7	2.2302e-12	6.4	6.4
2344	5930;6104;7708	IPI00291669	NP_659486	ENSG00000164332	UBLCP1	UBLCP1{ubiquitin-like domain containing CTD phosphatase 1 [Source:HGNC Symbol,Acc:28110]}	3	3	2	3	2	3	10.4	10.4	10.4	36.804	318	2	9	2.477e-08	7.5	10.4
2350	4639;7864;19651	IPI00291893	NP_065691	ENSG00000043093	DCUN1D1	DCUN1D1{DCN1, defective in cullin neddylation 1, domain containing 1 (S. cerevisiae) [Source:HGNC Symbol,Acc:18184]}	3	3	2	2	2	2	12.7	12.7	12.7	30.124	259	4	3	1.3353e-25	9.3	6.2
2362	981;7825;14453	IPI00292134	NP_001153441;NP_001972	ENSG00000085832	EPS15	EPS15{epidermal growth factor receptor pathway substrate 15 [Source:HGNC Symbol,Acc:3419]}	3	3	2	3	2	3	3.7	3.7	3.7	98.655	896	2	8	1.1629e-13	2.1	3.7
2363	3073;7966;10779;14576	IPI00292140	NP_004337;NP_116786	ENSG00000164305	CASP3	CASP3{caspase 3, apoptosis-related cysteine peptidase [Source:HGNC Symbol,Acc:1504]}	4	3	4	4	3	3	10.1	10.1	7.2	31.608	277	29	31	3.679e-15	10.1	10.1
[truncated: 1,586 more rows]
