# Supplementary material for: Quantitative Proteomics Analysis of Altered Protein Expression in the Placental Villous Tissue of Early Pregnancy Loss Using Isobaric Tandem Mass Tags
Source: Biomed Res Int. 2014 Mar 13;2014:647143. doi: 10.1155/2014/647143 (PMC3971554; doi:10.1155/2014/647143)
Supplement: Supplementary file 1 — Supplemental Docx1 provided the materials and methods such as reagents, western blot analysis and immunohistochemistry. Supplemental Data 1 gave the identified proteins information. Supplemental Data 2 gave the identified peptide information. Supplemental Data 3 listed the human placental villous tissue proteins that were differentially abundant between the two groups identified in Human placental villous (≧1.2-fold). Supplemental Graph 1 showed the GO analysis in both the molecular function and biological process of the differentially expressed proteins. [file 647143.f1.zip › Supplementray Materials/Supplemental Data 2.xlsx]

## Sheet: Sheet1
Supplemental Data 2. Peptides identified in Human placental villous with FDR of 1%
ID	Protein Group IDs	Sequence	Length	Missed Cleavages	Mass	Proteins	Leading Razor Protein	Unique (Groups)	Unique (Proteins)	Charges	PEP	Score	Experiment group1	Experiment group2	Unique Experiment group1	Unique Experiment group2
13233	21	NAAENMIEIIGFK	13	0	1448.73	IPI00000001;IPI00643664;IPI00218609;IPI00641873	IPI00000001	yes	no	3	0.0050508	89.403	2	4	2	4
14160	22	QGVEDAFYTIVR	12	0	1396.7	IPI00000005;IPI00000006	IPI00000005	yes	no	3	6.4478e-07	130.1	2	3	2	3
15707	23	SKDQAEEK	8	1	933.44	IPI00000015;IPI01015447;IPI00979480	IPI00000015	yes	no	3	0.015097	102.71	1	5	1	5
17979	24	VIPIMFPAIYR	11	0	1318.75	IPI00000030;IPI00946908;IPI00946763;IPI00219543;IPI00219544;IPI00947369	IPI00000030	yes	no	2	0.0026562	91.867	3		3
6878	25	HIAHIIISR	9	0	1058.63	IPI00299169;IPI00000047;IPI00640043	IPI00299169	yes	no	2	0.0048614	98.299	2	2	2	2
19559	26	YIIYDIIK	8	0	1039.6	IPI00000104;IPI00219610;IPI01014591;IPI00219611;IPI00219612;IPI01015903	IPI00000104	yes	no	2	0.0016053	114.93	2	2	2	2
752	27	AIIDFEDKDGDK	12	1	1364.65	IPI00000105	IPI00000105	yes	yes	3	0.00047739	113.93	1	3	1	3
1193	27	AQQIAEVEVK	10	0	1113.6	IPI00000105;IPI00910019	IPI00000105	yes	no	2	6.0137e-16	168.79	2	5	2	5
2025	27	DIAVAGPEMQVK	12	0	1256.64	IPI00000105;IPI00910019	IPI00000105	yes	no	2	5.6139e-05	119.39	1	2	1	2
2254	27	DITPIQVVIPNTAIHIK	17	0	1871.09	IPI00000105	IPI00000105	yes	yes	3,4	8.8175e-39	182.02	7	12	7	12
3394	27	EIEIVYAR	8	0	991.534	IPI00000105;IPI00910019	IPI00000105	yes	no	2	0.0017102	114.5		2		2
3542	27	EIPPGVEEIINK	12	0	1336.72	IPI00000105;IPI00910019	IPI00000105	yes	no	2,3	1.898e-43	201.46	4	16	4	16
5361	27	GAVASVTFDDFHK	13	0	1392.67	IPI00000105;IPI00910019	IPI00000105	yes	no	3	2.3952e-10	141.08	4	6	4	6
6685	27	HADIEIR	7	0	852.445	IPI00000105;IPI00910019	IPI00000105	yes	no	2	0.043449	81.297		1		1
7294	27	HYCTVANPVSR	11	0	1302.61	IPI00000105;IPI00910019	IPI00000105	yes	no	3	0.0041835	88.056	1	5	1	5
7547	27	IAQDPFPIYPGEVIEK	16	0	1814.95	IPI00000105	IPI00000105	yes	yes	2,3	6.2577e-46	196.11	7	14	7	14
7971	27	IEGEGSVIQAK	11	0	1129.6	IPI00000105;IPI00910019	IPI00000105	yes	no	2	3.9528e-07	141.08	1	1	1	1
8292	27	IFSVPDFVGDACK	13	0	1453.69	IPI00000105;IPI00910019	IPI00000105	yes	no	3	6.8505e-16	158.41	4	7	4	7
8852	27	IIDQSEAEK	9	0	1031.51	IPI00000105;IPI00910019	IPI00000105	yes	no	2	0.0058448	96.143	1	1	1	1
9385	27	IIQSIGIK	8	0	870.554	IPI00000105;IPI00910019	IPI00000105	yes	no	2,3	0.00025837	133.23	4	14	4	14
10079	27	IPPYHYIHVIDQNSNVSR	18	0	2151.09	IPI00000105;IPI00910019	IPI00000105	yes	no	3,4	3.1376e-75	213.18	7	4	7	4
11535	27	KDPQETAK	8	1	915.466	IPI00000105;IPI00910019	IPI00000105	yes	no	2,3	0.011643	94.114	1	11	1	11
15285	27	SFFIQPGEQIEQGIQDVYVISEQQGIIIR	29	0	3333.72	IPI00000105;IPI00910019	IPI00000105	yes	no	4	5.1909e-15	103.03	1		1
17830	27	VIFAPMR	7	0	832.463	IPI00000105;IPI00910019	IPI00000105	yes	no	2	0.010257	126.04	2	4	2	4
18279	27	VPHNAAVQVYDYR	13	0	1530.76	IPI00000105;IPI00910019	IPI00000105	yes	no	2,3	1.2626e-07	138.25	5	5	5	5
18403	27	VSHQAGDHWIIR	12	0	1417.72	IPI00000105;IPI00910019	IPI00000105	yes	no	2,3,4	1.0577e-12	156.36	8	7	8	7
18569	27	VVAGDEWIFEGPGTYIPR	18	0	2004.99	IPI00000105	IPI00000105	yes	yes	3	1.799e-05	94.532	3		3
19569	28	YIMVPSGNMGVFDPTEIHNR	20	0	2276.07	IPI00000115;IPI00642014	IPI00000115	yes	no	3	5.0732e-73	202.34	2	2	2	2
425	29	AFWDDWMR	8	0	1125.47	IPI00000138;IPI00179044	IPI00000138	yes	no	2	0.03815	74.127	7	6	7	6
2942	29	EAYDRDFIAR	10	1	1254.6	IPI00000138;IPI00179044	IPI00000138	yes	no	3	2.3865e-06	143.03		1		1
5954	29	GIIQQIGDAISSQR	14	0	1484.79	IPI00000138;IPI00964058;IPI00964148;IPI00964676;IPI00967770;IPI00965361;IPI00965858;IPI00964985;IPI00964457	IPI00000138	yes	no	2,3	3.0213e-32	182.33	6	8	6	8
6055	29	GIVTFQFR	8	0	966.529	IPI00000138;IPI00179044	IPI00000138	yes	no	2	0.015846	86.953	2	8	2	8
6534	29	GVSHGQFFDQHIK	13	0	1498.73	IPI00000138;IPI00179044	IPI00000138	yes	no	4	0.11542	60.641	1	1	1	1
7545	29	IAQDAEVEIER	11	0	1271.64	IPI00000138;IPI00964058;IPI00964148;IPI00964676;IPI00967770;IPI00965361;IPI00965858;IPI00964985;IPI00964457	IPI00000138	yes	no	2	0.038334	68.44	2	2	2	2
11715	29	KFQGYYK	7	1	932.476	IPI00000138;IPI00964058	IPI00000138	yes	no	3	0.12204	66.993	2	3	2	3
11827	29	KGVSHGQFFDQHIK	14	1	1626.83	IPI00000138;IPI00179044	IPI00000138	yes	no	3	2.2852e-62	210.15		1		1
18745	29	VYGAPQIQVEK	11	0	1230.66	IPI00000138;IPI00179044	IPI00000138	yes	no	2	0.00045815	109.42	2	2	2	2
18793	29	WAIGQVFR	8	0	975.529	IPI00000138;IPI00964058	IPI00000138	yes	no	2,3	0.0037756	105.95	10	15	10	15
2271	30	DIVIGPSGVIQGIRPGK	17	1	1704.99	IPI00000155;IPI00647134;IPI00647648;IPI00910934;IPI00644210	IPI00000155	yes	no	3	3.7627e-05	100.4		2		2
4489	30	FFGTEDHAWIK	11	0	1349.64	IPI00000155;IPI00647134;IPI00647648;IPI00910934	IPI00000155	yes	no	3	0.0058621	83.869	2	2	2	2
5426	31	GDKPVTYEEAHAPHYIAHR	19	1	2190.06	IPI00101258;IPI00000181	IPI00101258	yes	no	5	0.0043494	81.311	2	1	2	1
10166	32	IQDIYTVIHK	10	0	1228.68	IPI00000425;IPI00152221;IPI01014774	IPI00000425	yes	no	3	0.00085047	112.36	1	1	1	1
3138	33	EFNAEVHR	8	0	1000.47	IPI00000494;IPI00640037	IPI00000494	yes	no	2,3	0.0016144	114.89	7	9	7	9
3798	33	ENPVYEK	7	0	877.418	IPI00000494;IPI00640037	IPI00000494	yes	no	2	0.015496	101.99	1	6	1	6
4948	33	FPGYDSESK	9	0	1028.45	IPI00000494;IPI00640037	IPI00000494	yes	no	2	0.0041759	99.802		5		5
6947	33	HIMGQNVADYMR	12	0	1433.65	IPI00000494;IPI00640037	IPI00000494	yes	no	2,3	8.9944e-25	180.19	10	12	10	12
11001	33	IVIQDK	6	0	714.428	IPI00000494	IPI00000494	yes	yes	2	0.062549	91.26	2	8	2	8
11858	33	KHIMGQNVADYMR	13	1	1561.75	IPI00000494;IPI00640037	IPI00000494	yes	no	3,4	0.0032857	92.866	5	5	5	5
13720	33	NSVTPDMMEEMYK	13	0	1573.65	IPI00000494;IPI00640037	IPI00000494	yes	no	2,3	1.147e-36	194.3	1	13	1	13
14121	33	QFSQYIK	7	0	912.471	IPI00000494;IPI00640037	IPI00000494	yes	no	2,3	0.011665	120.46	1	9	1	9
14716	33	RFPGYDSESK	10	1	1184.55	IPI00000494;IPI00640037	IPI00000494	yes	no	2,3	7.9175e-05	133.23	4	8	4	8
17557	33	VFGAIK	6	0	633.385	IPI00000494;IPI00640037	IPI00000494	yes	no	2	0.038137	100.78	2	7	2	7
17651	33	VGITNYAAAYCTGIIIAR	18	0	1926	IPI00000494;IPI00640037	IPI00000494	yes	no	3	6.2967e-31	165.86	3	5	3	5
19564	33	YIMEEDEDAYK	11	0	1404.58	IPI00000494;IPI00640037	IPI00000494	yes	no	2	5.8711e-16	164.43		2		2
19565	33	YIMEEDEDAYKK	12	1	1532.67	IPI00000494;IPI00640037	IPI00000494	yes	no	2,3,4	2.1928e-69	229.16	8	8	8	8
354	34	AFGFSHIEAIIDDSK	15	0	1648.81	IPI00000581;IPI00939174;IPI01012383;IPI01014215	IPI00000581	yes	no	3	7.1311e-17	154.28	6	5	6	5
4479	34	FFEHFIEGGR	10	0	1237.59	IPI00000581;IPI00939174;IPI01012383;IPI01014215;IPI00409750;IPI01011145	IPI00000581	yes	no	2,3	8.05e-07	143.03	5	8	5	8
5489	34	GEGGTTNPHIFPEGSEPK	18	0	1852.86	IPI00000581;IPI00939174;IPI01012383;IPI00409750;IPI01011145	IPI00000581	yes	no	3	0.0007707	85.469		6		6
8010	34	IEISVIYK	8	0	963.564	IPI00000581;IPI00939174;IPI01012383;IPI01014215	IPI00000581	yes	no	2,3	0.001242	117.04	2	5	2	5
9483	34	IITSGYIQR	9	0	1049.59	IPI00000581;IPI00939174;IPI01012383;IPI01014215;IPI00409750;IPI01011145	IPI00000581	yes	no	2	0.042015	69.954		3		3
13885	34	PGHYDIIYK	9	0	1104.56	IPI00000581;IPI00939174;IPI01012383;IPI00409750;IPI01011145	IPI00000581	yes	no	3	1.7355e-19	131.06	2	1	2	1
16929	34	TRPDGNCFYR	10	1	1284.57	IPI00000581;IPI00939174;IPI01012383;IPI01014215	IPI00000581	yes	no	3	0.018841	86.624	2	2	2	2
8067	35	IETIIR	6	0	743.454	IPI00000643;IPI01013106	IPI00000643	no	no	2	0.055522	94.151		3
8068	35	IETIIRNIENSDK	13	1	1543.82	IPI00000643;IPI01013106	IPI00000643	yes	no	2	0.20363	66.267	1		1
14315	35	QISDGEREEINITANR	16	1	1843.9	IPI00000643;IPI01013106	IPI00000643	yes	no	3	3.0745e-08	116.51		4		4
5879	36	GIFSFFQGR	9	0	1057.53	IPI00000656;IPI01010860;IPI00935784;IPI00843937;IPI00790071	IPI00000656	yes	no	2	0.0016802	106.6	5	4	5	4
731	37	AIGTEVIQIFPEK	13	0	1443.8	IPI00000690;IPI00157908;IPI00300018	IPI00000690	yes	no	2,3	1.3575e-28	184.31	3	13	3	13
1120	37	APSHVPFIIIGGGTAAFAAAR	21	0	2023.1	IPI00000690;IPI00157908;IPI01015707;IPI00910786	IPI00000690	yes	no	3	4.7232e-62	188.9	3	5	3	5
1907	37	DGEQHEDINEVAK	13	0	1482.66	IPI00000690;IPI00157908;IPI00300018;IPI00976931	IPI00000690	yes	no	3	1.8363e-15	151.79		6		6
3635	37	EIWFSDDPNVTK	12	0	1449.68	IPI00000690;IPI00157908;IPI01015707;IPI00910786	IPI00000690	yes	no	2,3	4.0305e-08	138.75	2	4	2	4
6500	37	GVIFYIR	7	0	866.501	IPI00000690;IPI00157908;IPI00300018;IPI00976931	IPI00000690	yes	no	2	0.0035429	154.29	7	10	7	10
9305	37	IIPEYISNWTMEK	13	0	1622.8	IPI00000690;IPI00157908;IPI00300018;IPI00976931	IPI00000690	yes	no	2,3	1.6507e-10	144.1	9	7	9	7
10471	37	ISGIGITPEQK	11	0	1141.63	IPI00000690;IPI00157908;IPI01015707;IPI00910786	IPI00000690	yes	no	2	0.00039852	110.84	2	3	2	3
12562	37	KVVQIDVR	8	1	955.581	IPI00000690;IPI00157908;IPI01015707;IPI00910786	IPI00000690	yes	no	3	0.089054	66.258	1	4	1	4
16464	37	TGGIEIDSDFGGFR	14	0	1469.68	IPI00000690;IPI00157908;IPI00300018;IPI00976931	IPI00000690	yes	no	2	0.0020896	90.861		4		4
17941	37	VIIVSEDPEIPYMRPPISK	19	1	2182.17	IPI00000690;IPI00157908;IPI01015707;IPI00910786	IPI00000690	yes	no	3	2.8623e-20	133.66	4	5	4	5
18187	37	VNAEIQAR	8	0	899.482	IPI00000690;IPI00157908;IPI00300018;IPI00976931	IPI00000690	yes	no	2	0.13659	57.859	2	2	2	2
1095	38	APIEHEIAGEPQIR	14	0	1558.81	IPI00000692;IPI00644062	IPI00000692	yes	no	3	5.5251e-07	129.34	3	6	3	6
1818	38	DFAPGSQIPIIIYDSDAK	18	0	1948.98	IPI00000692;IPI00644062	IPI00000692	yes	no	2,3	2.2211e-61	197.14	3	15	3	15
3979	38	ESNTAGNDVFHK	12	0	1317.59	IPI00000692;IPI00644062	IPI00000692	yes	no	2,3	3.1737e-09	144.47	1	11	1	11
5022	38	FSAFIK	6	0	711.396	IPI00000692;IPI00644062;IPI00394749;IPI00165936	IPI00000692	yes	no	2	0.027451	106.29	2	9	2	9
6523	38	GVPFTITTVDTR	12	0	1305.69	IPI00000692;IPI00644062	IPI00000692	yes	no	2,3	1.2783e-12	155.11		6		6
7858	38	IDSYIR	6	0	765.402	IPI00000692;IPI00644062	IPI00000692	no	no	2	0.021356	124.12		4
8648	38	IHIVDTVCAHFR	12	0	1466.75	IPI00000692;IPI00644062	IPI00000692	yes	no	3,4	1.3889e-05	125.74	8		8
10246	38	IQIFVK	6	0	746.469	IPI00000692	IPI00000692	no	no	2	0.050784	95.957	3	9
13666	38	NPVPAQDEAIYQQIIR	16	0	1853.96	IPI00000692;IPI00644062	IPI00000692	yes	no	2,3	1.7802e-88	231.58	2	9	2	9
14997	38	RSPDVIK	7	1	813.471	IPI00000692;IPI00644062	IPI00000692	yes	no	2,3	0.01562	110.81	1	2	1	2
16323	38	TDTIQIEDFIEETIGPPDFPSIAPR	25	0	2800.38	IPI00000692;IPI00644062	IPI00000692	yes	no	3	5.3105e-09	101.89	1		1
19485	38	YIDSAMQEK	9	0	1083.49	IPI00000692	IPI00000692	yes	yes	2,3	0.00013426	120.99	2	10	2	10
19843	38	YTCPHSAEIIAAYR	14	0	1650.78	IPI00000692	IPI00000692	yes	yes	3	1.257e-10	140.24	4	4	4	4
19844	38	YTCPHSAEIIAAYRPAVHPR	20	1	2308.15	IPI00000692	IPI00000692	yes	yes	3,4,5	1.5571e-43	172.82	4	6	4	6
143	39	AAYVIFYQR	9	0	1129.59	IPI00000728;IPI00219505;IPI01015293;IPI00219504;IPI00184533;IPI00011836;IPI00216257	IPI00000728	yes	no	2,3	0.0011822	109.86	6	7	6	7
11093	39	IVSWYTIMEGQEPIAR	16	0	1891.95	IPI00000728;IPI00219505;IPI01015293;IPI00219504;IPI00165116;IPI00796350	IPI00000728	yes	no	3	1.9223e-45	194.3	3	2	3	2
11319	39	IYNIIIIR	8	0	1016.64	IPI00000728;IPI00219505;IPI01015293;IPI00219504	IPI00000728	yes	no	2	0.0030352	109.01	5	5	5	5
11746	39	KGDTWYIVDSR	11	1	1338.66	IPI00000728;IPI00219505;IPI01015293;IPI00219504;IPI00165116;IPI00796350	IPI00000728	yes	no	3	0.0021452	96.171	2	1	2	1
15297	39	SFIAIDWDPDIK	12	0	1418.71	IPI00000728;IPI00219505;IPI01015293;IPI00219504	IPI00000728	yes	no	2,3	0.00050272	104.79	2		2
18566	39	VVAEEAWENHIK	12	0	1423.71	IPI00000728;IPI00219505;IPI01015293;IPI00219504	IPI00000728	yes	no	3	0.0010337	100.88	1	2	1	2
13212	40	MWVFSNIR	8	0	1051.53	IPI00000761;IPI00978384	IPI00000761	yes	no	2	0.004183	104.45	4	5	4	5
2560	41	DSYSGGVVNMYHMK	14	0	1586.69	IPI00000783;IPI00640155;IPI00215824;IPI00893032;IPI00552984	IPI00000783	yes	no	3	1.0821e-05	125.82	2	1	2	1
17499	41	VESTDVSDIIHQYR	14	0	1660.81	IPI00000783;IPI00640155;IPI00215824;IPI00893032;IPI00552984	IPI00000783	yes	no	3	0.040729	83.137		1		1
2238	42	DISIISHGGR	10	0	1053.56	IPI00000792;IPI00641565;IPI00645425	IPI00000792	yes	no	3	0.025885	73.233	1	1	1	1
14131	42	QGAAIGIPYFTAYR	14	0	1526.79	IPI00000792;IPI00647366;IPI00641565;IPI00642016	IPI00000792	yes	no	3	0.084445	61.11	1	3	1	3
17203	42	VAEAHENIIHGSGATGK	17	0	1689.84	IPI00000792;IPI00647366;IPI00645425	IPI00000792	yes	no	4	0.04798	64.52	1	1	1	1
17544	42	VFEFGGPEVIK	11	0	1220.64	IPI00000792;IPI00647366;IPI00641565;IPI00642016	IPI00000792	yes	no	3	0.00033468	112.36	1	4	1	4
14535	43	QVIIGDQIPK	10	0	1109.64	IPI00000811;IPI00789119;IPI00796198	IPI00000811	yes	no	2	0.0015104	104.22	2	6	2	6
40	44	AAFDDAIAEIDTISEESYK	19	0	2086.96	IPI00000816;IPI00974544	IPI00000816	yes	no	2,3	2.3446e-44	177.88	6	5	6	5
99	44	AASDIAMTEIPPTHPIR	17	0	1818.93	IPI00000816;IPI00974544;IPI00793344	IPI00000816	yes	no	3	2.2728e-08	105.99	1	6	1	6
2400	44	DNITIWTSDMQGDGEEQNK	19	0	2179.93	IPI00000816;IPI00974544;IPI00086909	IPI00000816	yes	no	3	3.8196e-112	238.81	1	5	1	5
2790	44	EAAENSIVAYK	11	0	1193.59	IPI00000816;IPI00974544;IPI00793344	IPI00000816	yes	no	2,3	9.6474e-17	172.34	5	8	5	8
3082	44	EENKGGEDK	9	1	1004.44	IPI00000816;IPI00974544;IPI00793344;IPI00792761;IPI00795516	IPI00000816	yes	no	3	0.1141	71.501		8		8
6933	44	HIIPAANTGESK	12	0	1236.65	IPI00000816;IPI00974544;IPI00793344	IPI00000816	yes	no	2,3	9.6327e-11	150.61	2	16	2	16
9434	44	IISSIEQK	8	0	916.523	IPI00000816;IPI00974544;IPI00793344;IPI00086909;IPI00792761;IPI00795516	IPI00000816	yes	no	2	7.6841e-05	141.39	2	5	2	5
9435	44	IISSIEQKEENK	12	1	1416.75	IPI00000816;IPI00974544;IPI00793344;IPI00086909;IPI00792761;IPI00795516	IPI00000816	yes	no	3	0.00016063	119.68		4		4
11566	44	KEAAENSIVAYK	12	1	1321.69	IPI00000816;IPI00974544;IPI00793344	IPI00000816	yes	no	3	7.7019e-05	118.28	2	6	2	6
14388	44	QMVETEIK	8	0	976.49	IPI00000816;IPI00974544;IPI00793344;IPI00086909;IPI00792761	IPI00000816	yes	no	2	0.0023766	111.74	2	4	2	4
19231	44	YDEMVESMK	9	0	1130.46	IPI00000816;IPI00793344;IPI00086909;IPI00792761;IPI00795516	IPI00000816	yes	no	2,3	8.4405e-06	131.44	1	13	1	13
19459	44	YIAEFATGNDR	11	0	1255.58	IPI00000816;IPI00974544;IPI00793344;IPI00086909;IPI00903243	IPI00000816	yes	no	2,3	0.00019952	115.57	1	10	1	10
19460	44	YIAEFATGNDRK	12	1	1383.68	IPI00000816;IPI00974544;IPI00793344;IPI00086909;IPI00903243	IPI00000816	yes	no	3	0.022576	75.416	2	2	2	2
1600	45	AYPTPIR	7	0	816.449	IPI00000833	IPI00000833	yes	yes	2	0.0068049	135.36	18	24	18	24
12427	45	KTMIVQK	7	1	846.5	IPI00000833	IPI00000833	yes	yes	2,3	0.01576	106.04	3	10	3	10
16802	45	TMIVQK	6	0	718.405	IPI00000833	IPI00000833	yes	yes	2	0.012469	133.99	11	19	11	19
18553	45	VTVMGGFK	8	0	837.442	IPI00000833	IPI00000833	yes	yes	2,3	0.00024919	133.55	18	33	18	33
381	46	AFINAIMR	8	0	934.506	IPI00455210;IPI00000846;IPI01012026;IPI00152535;IPI00646871;IPI00445286;IPI01011841;IPI01013432	IPI00455210	yes	no	2	0.053158	69.198		4		4
406	46	AFSQFVRPIIAAK	13	1	1446.83	IPI00455210;IPI00000846;IPI01012026;IPI01013311	IPI00455210	yes	no	3	0.039771	80.245	1	4	1	4
1611	46	AYVSIFMR	8	0	985.506	IPI00455210;IPI00000846;IPI01012026;IPI00152535;IPI00646871;IPI00445286;IPI01011841;IPI01013432;IPI00465222;IPI00373870;IPI00411592;IPI00910580	IPI00455210	yes	no	2	0.0093137	94.662	2	4	2	4
5789	46	GHVHYIIK	8	0	965.545	IPI00455210;IPI00000846;IPI01012026	IPI00455210	yes	no	2,3	5.9678e-05	148.07	3	2	3	2
8563	46	IGVMSIIR	8	0	887.526	IPI00455210;IPI00000846;IPI01012026	IPI00455210	yes	no	2	0.00014292	137.18	1	5	1	5
11428	46	KAFINAIMR	9	1	1062.6	IPI00455210;IPI00000846;IPI01012026;IPI00152535;IPI00646871;IPI00445286;IPI01011841;IPI01013432	IPI00455210	yes	no	3	0.047006	71.379	5	5	5	5
12453	46	KTYEIWHR	8	1	1131.58	IPI00455210;IPI00000846;IPI01012026	IPI00455210	yes	no	3	0.12497	61.962	2	1	2	1
13002	46	MMITHIVVR	9	0	1098.6	IPI00455210;IPI00000846;IPI01012026;IPI00152535;IPI00646871;IPI00445286;IPI01011841;IPI01013432;IPI00465222;IPI00373870;IPI00411592	IPI00455210	yes	no	3	0.00047489	114.5		4		4
14220	46	QIEEIISDMK	10	0	1204.6	IPI00455210;IPI00000846;IPI01012026;IPI00152535;IPI00445286;IPI00465222;IPI00373870;IPI00411592;IPI00910580	IPI00455210	yes	no	2	0.0078272	83.081	1		1
17138	46	TYEIWHR	7	0	1003.49	IPI00455210;IPI00000846;IPI01012026	IPI00455210	yes	no	3	0.073175	70.912	2		2
19394	46	YGIKPEWMMIHR	12	1	1559.77	IPI00455210;IPI00000846;IPI01012026;IPI00152535;IPI00646871;IPI00444866	IPI00455210	yes	no	4	0.0044899	97.456	4	5	4	5
957	47	AKDQNESIDEEMFYK	15	1	1845.81	IPI00913848;IPI00000856	IPI00913848	yes	no	3	9.3805e-55	201.6	2	1	2	1
2715	47	DWSDHAIWWEK	11	0	1471.65	IPI00913848;IPI00000856;IPI00383500	IPI00913848	yes	no	3	0.00062718	105.4	2	1	2	1
7069	47	HPEEISIIK	9	0	1064.59	IPI00913848;IPI00000856;IPI00383500	IPI00913848	yes	no	3	8.4681e-05	123.72	1	3	1	3
9191	47	IIIPVAEGMNEIWIR	15	0	1752.96	IPI00913848;IPI00000856;IPI00383500	IPI00913848	yes	no	2	5.9748e-08	129.54	1	1	1	1
9917	47	INQGWIDSSR	10	0	1174.57	IPI00913848;IPI00000856;IPI00383500	IPI00913848	yes	no	2	0.0038978	92.538		2		2
10220	47	IQFTPQHK	8	0	997.535	IPI00913848;IPI00000856;IPI00383500	IPI00913848	yes	no	3	0.020041	82.452	1	4	1	4
11559	47	KDWSDHAIWWEK	12	1	1599.75	IPI00913848;IPI00000856;IPI00383500	IPI00913848	yes	no	4	0.078029	63.624	1	1	1	1
12789	47	MFKPQAIIDK	10	1	1189.65	IPI00913848;IPI00000856;IPI00383500	IPI00913848	yes	no	3	0.011187	92.838	2	2	2	2
14578	47	QYAHWMAACR	10	0	1292.55	IPI00913848;IPI00000856;IPI00383500	IPI00913848	yes	no	3	0.00078871	113.18	2	2	2	2
15599	47	SIMEQDVKENEAIIIR	16	1	1886.98	IPI00913848;IPI00000856;IPI00383500	IPI00913848	yes	no	3	1.2527e-18	152.4	2	1	2	1
15712	47	SKEESSGTPAHQMNIR	16	1	1770.83	IPI00913848;IPI00000856;IPI00383500	IPI00913848	yes	no	4	4.2536e-07	106.13	1	1	1	1
19961	47	YYSFFDINPK	10	0	1292.61	IPI00913848;IPI00000856;IPI00383500;IPI00304754;IPI00643475;IPI00383562;IPI00220602	IPI00913848	yes	no	2,3	1.2351e-22	176.83	4	4	4	4
3450	48	EIHIDHNQISR	11	0	1360.68	IPI00000860;IPI01011097;IPI00942466	IPI00000860	yes	no	3	0.0007339	104.05	1	1	1	1
19580	48	YIPFVPSR	8	0	977.533	IPI00000860;IPI01011097;IPI00903188	IPI00000860	yes	no	2	0.070506	66.682	1	4	1	4
5639	49	GFSVVADTPEIQR	13	0	1417.72	IPI00000861;IPI00386803;IPI00909678;IPI00883946;IPI00909481;IPI00909939	IPI00000861	yes	no	2	0.0013878	100.38	2	2	2	2
11128	49	IVYPTEK	7	0	848.464	IPI00000861;IPI00386803;IPI00909481;IPI00909939	IPI00000861	yes	no	2	0.013498	104.11	1	5	1	5
12273	49	KPYCNAHYPK	10	1	1276.6	IPI00000861;IPI00386803;IPI00883946;IPI00909481;IPI00909939;IPI00418240;IPI00956362	IPI00000861	yes	no	3	0.036195	71.349	2	1	2	1
12830	49	MGPSGGEGMEPERR	14	1	1488.64	IPI00000861;IPI00386803;IPI00909678;IPI00883946;IPI00015157	IPI00000861	yes	no	3	0.0017343	92.247	1	2	1	2
16458	49	TGDTGMIPANYVEAI	15	0	1550.73	IPI00000861;IPI00909678	IPI00000861	yes	no	2	2.6216e-08	134.99	2	6	2	6
19427	49	YHEEFEK	7	0	980.424	IPI00000861;IPI00386803;IPI00909678;IPI00883946;IPI00015157	IPI00000861	yes	no	2,3	0.011808	119.89	3	2	3	2
1114	50	APPPSIPSPSR	11	0	1104.59	IPI00746788;IPI00954109;IPI00942482;IPI00000870;IPI01010185;IPI00896513;IPI00177818;IPI00903008;IPI01012826;IPI00844271	IPI00746788	yes	no	2	0.00017092	116.52	12	17	12	17
1651	50	CRPINATIAVEK	12	1	1370.73	IPI00746788;IPI00954109;IPI00942482;IPI00000870;IPI01010185;IPI00896513;IPI00177818;IPI00903008;IPI01012826;IPI00844271;IPI00980043;IPI01010290	IPI00746788	yes	no	3	4.9747e-12	152.85	2	6	2	6
4978	50	FQDSSSSK	8	0	884.388	IPI00746788;IPI00954109;IPI00942482;IPI00000870;IPI01010185;IPI00896513;IPI00844271;IPI00980043	IPI00746788	yes	no	2,3	0.0028657	109.71	9	20	9	20
6516	50	GVNPVVSYAVAISCQCAICR	20	0	2223.06	IPI00746788;IPI00954109;IPI00942482;IPI00000870;IPI01010185;IPI00896513;IPI00177818;IPI00903008;IPI01012826;IPI00844271;IPI00980043;IPI01010290	IPI00746788	yes	no	3	7.7498e-73	199.08	2	6	2	6
10015	50	IPGPSDTPIIPQ	12	0	1233.66	IPI00746788;IPI00954109;IPI00942482;IPI00000870;IPI01010185;IPI00177818;IPI00903008;IPI01012826	IPI00746788	yes	no	2,3	0.0021335	93.058	9	13	9	13
16052	50	STTDCGGPK	9	0	921.386	IPI00746788;IPI00954109;IPI00942482;IPI00000870;IPI01010185;IPI00896513;IPI00177818;IPI00903008;IPI01012826;IPI00844271;IPI00980043;IPI01010290	IPI00746788	yes	no	2	0.0017071	106.42	3	5	3	5
18003	50	VIQGVIPAIPQVVCNYR	17	0	1925.06	IPI00746788;IPI00954109;IPI00942482;IPI00000870;IPI01010185;IPI00896513;IPI00177818;IPI00903008;IPI01012826;IPI00844271;IPI00980043;IPI01010290	IPI00746788	yes	no	2,3,4	6.1826e-61	205.3	11	32	11	32
876	51	AISPIEEWIR	10	0	1212.65	IPI00893918;IPI00000873;IPI00646425;IPI00793323;IPI00893211;IPI00893333	IPI00893918	yes	no	2,3	0.00027041	123.86	11	8	11	8
2834	51	EAFIQEVWK	9	0	1148.59	IPI00893918;IPI00000873;IPI00893487	IPI00893918	yes	no	3	0.012869	85.676	2	1	2	1
5326	51	GAIINVPPPFIGIPR	15	0	1559.92	IPI00893918;IPI00000873	IPI00893918	yes	no	3	0.011996	71.806	2	6	2	6
6824	51	HGIEAISIMDSR	12	0	1327.66	IPI00893918;IPI00000873	IPI00893918	yes	no	3	6.8556e-05	117.52	1	2	1	2
8069	51	IETMIGDVAVAVHPK	15	0	1578.84	IPI00893918;IPI00000873;IPI00893487	IPI00893918	yes	no	3	9.0659e-33	180.24	2	2	2	2
8596	51	IHEEGIIYR	9	0	1128.59	IPI00893918;IPI00000873;IPI00893487	IPI00893918	yes	no	2,3	5.8572e-06	133.86	2	2	2	2
9430	51	IISPFMPFVTEEIFQR	16	0	1953.01	IPI00893918;IPI00000873;IPI00908612	IPI00893918	yes	no	3	2.6021e-11	137.62	1		1
10783	51	ITPAHDQNDYEVGQR	15	0	1741.8	IPI00893918;IPI00000873	IPI00893918	yes	no	3	1.4644e-69	219.43		4		4
11557	51	KDVSGPMPDSYSPR	14	1	1534.71	IPI00893918;IPI00000873;IPI00646425	IPI00893918	yes	no	3	0.00053482	101.89		2		2
12465	51	KVDEAIAIFQK	11	1	1260.71	IPI00893918;IPI00000873;IPI00908612	IPI00893918	yes	no	3	0.00079124	104.79	1	2	1	2
13784	51	NVIHPFISR	9	0	1081.6	IPI00893918;IPI00000873;IPI00893487	IPI00893918	yes	no	3	0.0090797	90.657	1		1
14342	51	QIWWGHR	7	0	981.493	IPI00893918;IPI00000873;IPI00908612;IPI00788898	IPI00893918	yes	no	2,3	0.012652	116.54	12	15	12	15
15709	51	SKDVVEPIIRPQWYVR	16	2	1984.09	IPI00893918;IPI00000873;IPI00908612	IPI00893918	yes	no	3	2.248e-06	109.07	1	1	1	1
17121	51	TWHAWMDNIR	10	0	1328.61	IPI00893918;IPI00000873;IPI00908612	IPI00893918	yes	no	2,3	1.2664e-15	163.16	14	7	14	7
18896	51	WFVTCVR	7	0	966.475	IPI00893918;IPI00000873;IPI00646425	IPI00893918	yes	no	2	0.0095677	128.38	4	4	4	4
19372	51	YGEAGEGPGWGGAHPR	16	0	1596.71	IPI00893918;IPI00000873;IPI00908612;IPI00646425;IPI00793323;IPI00893211	IPI00893918	yes	no	3	5.2046e-26	164.81		1		1
166	52	ADEGISFR	8	0	893.424	IPI00000874;IPI00640741;IPI00641244	IPI00000874	yes	no	2	0.0012933	116.37	14	15	14	15
1309	52	ATAVMPDGQFK	11	0	1163.56	IPI00000874;IPI00640741	IPI00000874	yes	no	2,3	1.2365e-10	151.15	10	19	10	19
2239	52	DISISDYK	8	0	939.455	IPI00000874;IPI00640741	IPI00000874	yes	no	2,3	6.5934e-05	145.63	9	15	9	15
6813	52	HGEVCPAGWKPGSDTIKPDVQK	22	2	2405.18	IPI00000874;IPI00641244	IPI00000874	yes	no	4	5.3062e-09	105.9	1		1
8438	52	IGHPAPNFK	9	0	979.524	IPI00000874;IPI00640741;IPI00641244	IPI00000874	yes	no	2,3	0.00047489	114.5	11	13	11	13
11051	52	IVQAFQFTDK	10	0	1195.62	IPI00000874;IPI00640741;IPI00641244	IPI00000874	yes	no	2,3	1.743e-10	155.06	4	17	4	17
12305	52	KQGGIGPMNIPIVSDPK	17	1	1749.94	IPI00000874;IPI00640741	IPI00000874	yes	no	3,4	2.1886e-48	185.95	4	18	4	18
14142	52	QGGIGPMNIPIVSDPK	16	0	1621.85	IPI00000874;IPI00640741	IPI00000874	yes	no	2,3	3.0505e-14	145.52	4	14	4	14
15719	52	SKEYFSK	7	1	887.439	IPI00000874;IPI00641244	IPI00000874	yes	no	2	0.036868	117.4	1	2	1	2
16550	52	TIAQDYGVIK	10	0	1106.6	IPI00000874;IPI00640741	IPI00000874	yes	no	2,3	1.2447e-15	163.34	8	20	8	20
745	53	AIIAAQYSGAQVR	13	0	1346.73	IPI00000875;IPI00937615;IPI00908389	IPI00000875	yes	no	2,3	3.434e-21	168.98	3	7	3	7
955	53	AKDPFAHIPK	10	1	1122.62	IPI00000875;IPI00937615;IPI00909534;IPI01010194	IPI00000875	yes	no	2,3,4	0.0016628	116.23	3	4	3	4
1451	53	AVIGEVK	7	0	714.428	IPI00000875;IPI00937615	IPI00000875	yes	no	2	0.012789	114.54	7	15	7	15
1965	53	DGWSIWYSEYR	11	0	1460.64	IPI00000875;IPI00937615;IPI00909534;IPI01010194	IPI00000875	yes	no	2,3	1.5429e-50	208.6	14	13	14	13
2431	53	DPFAHIPK	8	0	923.486	IPI00000875;IPI00937615;IPI00909534;IPI01010194	IPI00000875	yes	no	3	0.12475	58.815		1		1
4249	53	EYFSWEGAFQHVGK	14	0	1683.77	IPI00000875;IPI00937615;IPI00909534;IPI01010194	IPI00000875	yes	no	2,3,4	2.8095e-52	208.27	17	19	17	19
4301	53	FAETQPK	7	0	819.413	IPI00000875;IPI00937615	IPI00000875	yes	no	2	0.014814	102.71		4		4
6256	53	GQEIAFPISPDWQVDYESYTWR	22	0	2686.23	IPI00000875;IPI00937615;IPI00909534;IPI01010194	IPI00000875	yes	no	3	2.5672e-61	184.32	1		1
9041	53	IIGIIDAYIK	10	0	1117.67	IPI00000875;IPI00937615;IPI00909534;IPI01010194;IPI00908389	IPI00000875	yes	no	2,3	2.6839e-23	183.57	28	22	28	22
11664	53	KFAETQPK	8	1	947.508	IPI00000875;IPI00937615	IPI00000875	yes	no	2,3	0.0080269	99.802	2	9	2	9
11920	53	KIDPGSEETQTIVR	14	1	1571.82	IPI00000875;IPI00937615;IPI00909534	IPI00000875	yes	no	3	0.0009716	96.604	3	8	3	8
12681	53	MAQFDAK	7	0	809.374	IPI00000875;IPI00937615	IPI00000875	yes	no	2	0.013406	104.21	4	10	4	10
13996	53	QATENAKEEVR	11	1	1273.63	IPI00000875;IPI00937615;IPI00909534;IPI01010194;IPI00908389	IPI00000875	yes	no	3	3.8286e-11	161.17		6		6
14534	53	QVIEPSFR	8	0	974.519	IPI00000875;IPI00937615	IPI00000875	yes	no	2	0.051418	80.165		1		1
16009	53	STFVIDEFK	9	0	1084.54	IPI00000875;IPI00937615;IPI00909534;IPI01010194	IPI00000875	yes	no	2,3	9.1808e-08	141.48	4	17	4	17
16010	53	STFVIDEFKR	10	1	1240.65	IPI00000875;IPI00937615;IPI00909534;IPI01010194	IPI00000875	yes	no	2,3	0.00032778	123.86	10	7	10	7
16842	53	TPEFIR	6	0	761.407	IPI00000875;IPI00937615;IPI00908389	IPI00000875	yes	no	2	0.025947	110.24	1	7	1	7
18022	53	VISAPPHFHFGQTNR	15	0	1706.86	IPI00000875;IPI00937615;IPI00908389;IPI01011435	IPI00000875	yes	no	3,4	6.5853e-33	181.66	24	21	24	21
18886	53	WFITCINQPQFR	12	0	1608.79	IPI00000875;IPI00937615	IPI00000875	yes	no	2,3,4	3.2153e-81	235.01	24	31	24	31
86	54	AANSIEAFIFETQDK	15	0	1682.82	IPI00000877;IPI01011324;IPI00922838;IPI01010461;IPI00982087	IPI00000877	yes	no	2,3	6.6551e-57	208.39	9	16	9	16
231	54	AEAGPEGVAPAPEGEK	16	0	1507.72	IPI00000877;IPI01011324;IPI00922838;IPI01010461;IPI00982087	IPI00000877	yes	no	3	1.055e-07	109	1	1	1	1
232	54	AEAGPEGVAPAPEGEKK	17	1	1635.81	IPI00000877;IPI01011324;IPI00922838;IPI01010461;IPI00982087	IPI00000877	yes	no	3	2.5238e-38	177.38		6		6
1436	54	AVGKEEIGK	9	1	929.518	IPI00000877;IPI00922838;IPI01010461;IPI00977915;IPI00922127	IPI00000877	yes	no	2,3	1.6434e-07	145.17		9		9
1745	54	DAVITVPVFFNQAER	15	0	1704.88	IPI00000877;IPI01011324;IPI00922838;IPI01010461;IPI00977915;IPI00922127	IPI00000877	yes	no	2,3	6.8333e-43	186.58	2	14	2	14
1747	54	DAVVYPIIVEFTR	13	0	1520.82	IPI00000877;IPI01011324;IPI00922838;IPI01010461;IPI00977915;IPI00922127	IPI00000877	yes	no	2,3	2.3335e-36	191.52	11	15	11	15
4108	54	EVEEEPGIHSIK	12	0	1365.68	IPI00000877;IPI01011324;IPI00922838;IPI01010461;IPI00977915;IPI00922127	IPI00000877	yes	no	2,3	5.0819e-35	196.88		7		7
4170	54	EVQYIINK	8	0	1005.55	IPI00000877;IPI01011324;IPI00922838;IPI01010461;IPI00982087	IPI00000877	yes	no	2	7.6606e-05	141.48	5	11	5	11
4485	54	FFGDSAASMAIK	12	0	1243.59	IPI00000877;IPI01011324;IPI00922838;IPI00977915;IPI00982087;IPI01012802;IPI01009681	IPI00000877	yes	no	2,3	1.3477e-18	172.8	4	15	4	15
4941	54	FPEHEITFDPQR	12	0	1514.72	IPI00000877;IPI01011324;IPI00922838;IPI00977915;IPI00982087;IPI00922127;IPI01012802;IPI01009681	IPI00000877	yes	no	3	4.6929e-05	120.77	5	9	5	9
5385	54	GDATPEGEK	9	0	902.398	IPI00000877;IPI01011324;IPI01010461;IPI00977915;IPI00982087	IPI00000877	yes	no	2	0.0001837	118.26	2	8	2	8
6489	54	GVGDSFK	7	0	708.344	IPI00000877;IPI01011324;IPI00922838;IPI01010461;IPI00977915;IPI00982087;IPI00922127	IPI00000877	yes	no	2	0.012891	110.36	5	8	5	8
7422	54	IAGIFNEQR	9	0	1046.55	IPI00000877;IPI01011324;IPI00922838;IPI01010461;IPI00977915;IPI00922127	IPI00000877	yes	no	2,3	7.2385e-06	132.57	6	13	6	13
7568	54	IAQSVQK	7	0	772.444	IPI00000877;IPI01011324;IPI00922838;IPI01010461;IPI00982087	IPI00000877	yes	no	2	0.012956	107.66	6	10	6	10
7677	54	ICQGIFFR	8	0	1039.53	IPI00000877;IPI01011324;IPI00922838;IPI01010461;IPI00982087	IPI00000877	yes	no	2	0.013806	89.142	2	7	2	7
8517	54	IGNTISSIFGGGTTPDAK	18	0	1734.88	IPI00000877;IPI01011324;IPI00922838;IPI01010461;IPI00977915;IPI00982087;IPI00922127	IPI00000877	yes	no	2,3	1.1943e-31	172.37	4	11	4	11
9304	54	IIPEMDQIFTEVEMTTIEK	19	0	2266.11	IPI00000877;IPI01011324;IPI00922838;IPI01010461;IPI00982087	IPI00000877	yes	no	3,4	1.4723e-14	125.52	3	2	3	2
9971	54	IPATEKPVIISK	12	1	1294.79	IPI00000877;IPI01011324;IPI00922838;IPI01010461;IPI00982087	IPI00000877	yes	no	2,3	4.0729e-33	194.17	5	15	5	15
10162	54	IQDITIR	7	0	857.497	IPI00000877;IPI01011324;IPI00922838;IPI01010461;IPI00982087	IPI00000877	no	no	2	0.053108	77.923	2	6
10390	54	ISAASTWIEDEGVGATTVMIK	21	0	2178.09	IPI00000877;IPI01011324;IPI00922838;IPI01010461;IPI00982087	IPI00000877	yes	no	3,4	1.1133e-21	128.59	2	1	2	1
11340	54	IYQPEYQEVSTEEQR	15	0	1897.87	IPI00000877;IPI01011324;IPI00922838;IPI01010461;IPI00982087	IPI00000877	yes	no	2,3	2.3781e-97	238.43	1	2	1	2
11341	54	IYQPEYQEVSTEEQREEISGK	21	1	2541.19	IPI00000877;IPI01011324;IPI00922838;IPI01010461;IPI00982087	IPI00000877	yes	no	3,4	4.3667e-52	182.15		8		8
11903	54	KICQGIFFR	9	1	1167.62	IPI00000877;IPI01011324;IPI00922838;IPI01010461;IPI00982087	IPI00000877	yes	no	2,3	3.366e-06	136.75	9	7	9	7
12432	54	KTPVIVTIK	9	1	997.654	IPI00000877;IPI01011324;IPI00922838;IPI00977915;IPI00982087;IPI01012802;IPI01009681	IPI00000877	yes	no	2,3	3.6384e-08	147.75	3	13	3	13
12631	54	KYPDYESK	8	1	1028.48	IPI00000877;IPI01011324;IPI00922838;IPI01010461;IPI00977915;IPI00982087;IPI00922127	IPI00000877	yes	no	2,3	0.0013699	118.5	3	5	3	5
12994	54	MMAIDR	6	0	735.341	IPI00000877;IPI01011324;IPI00922838;IPI01010461;IPI00982087	IPI00000877	yes	no	2	0.023628	116.39		6		6
13498	54	NINADEAAAMGAVYQAAAISK	21	0	2078.01	IPI00000877;IPI01011324;IPI00922838;IPI01010461;IPI00977915;IPI00922127	IPI00000877	yes	no	3	1.6194e-63	196.71	2	8	2	8
13953	54	QADNPHVAIYQAR	13	0	1481.74	IPI00000877;IPI01011324;IPI00977915;IPI00982087;IPI00922127;IPI01012802;IPI01009681	IPI00000877	yes	no	3	1.408e-06	128.08	4	6	4	6
15450	54	SIAEDFAEQPIK	12	0	1346.67	IPI00000877;IPI01011324;IPI00922838;IPI01010461;IPI00977915;IPI00922127	IPI00000877	yes	no	2,3	3.8786e-13	160.15	1	5	1	5
15451	54	SIAEDFAEQPIKDAVITVPVFFNQAER	27	1	3033.54	IPI00000877;IPI01011324;IPI00922838;IPI01010461;IPI00977915;IPI00922127	IPI00000877	yes	no	3	6.2066e-30	133.74	1	1	1	1
16613	54	TIGGIEMEIR	10	0	1117.58	IPI00000877;IPI01011324;IPI00922838;IPI01010461;IPI00977915;IPI00922127	IPI00000877	yes	no	2,3	0.0016118	103.7	2	9	2	9
16765	54	TKEAGMQPQIQIR	13	1	1498.79	IPI00000877;IPI01011324;IPI00922838;IPI01010461;IPI00977915;IPI00922127	IPI00000877	yes	no	3	0.0012339	110.66		3		3
17075	54	TVISANADHMAQIEGIMDDVDFK	23	0	2519.17	IPI00000877;IPI01011324;IPI00922838;IPI01010461;IPI00977915;IPI00922127	IPI00000877	yes	no	3,4	5.4599e-105	212.83	5	3	5	3
17251	54	VAIVKPGVPMEIVINK	16	1	1706.02	IPI00000877;IPI00922838;IPI00977915;IPI00982087;IPI01012802;IPI01009681	IPI00000877	yes	no	3	9.4285e-86	222.79	5	12	5	12
17441	54	VEFEEICADIFER	13	0	1655.75	IPI00000877;IPI01011324;IPI00922838;IPI01010461;IPI00977915;IPI00922127	IPI00000877	yes	no	2,3	4.4052e-21	167.6	6	1	6	1
17500	54	VESVFETIVEDSAEEESTITK	21	0	2341.11	IPI00000877;IPI01011324;IPI00922838;IPI01010461;IPI00977915;IPI00982087;IPI00922127	IPI00000877	yes	no	2,4	1.164e-21	128.1	1	2	1	2
18007	54	VIQIINDNTATAISYGVFR	19	0	2094.11	IPI00000877;IPI01011324;IPI00922838;IPI01010461;IPI00977915;IPI00922127	IPI00000877	yes	no	2,3	3.4715e-66	200.33	1	2	1	2
18277	54	VPGPVQQAIQSAEMSIDEIEQVIIVGGATR	30	0	3134.63	IPI00000877;IPI01011324;IPI00922838;IPI01010461;IPI00977915;IPI00922127	IPI00000877	yes	no	3	1.5274e-07	76.799		1		1
18331	54	VQEVIIK	7	0	827.512	IPI00000877;IPI01011324;IPI00922838;IPI01010461;IPI00977915;IPI00922127	IPI00000877	yes	no	2	0.018882	98.392	6	12	6	12
19349	54	YFQHIIGK	8	0	1004.54	IPI00000877;IPI01011324;IPI00922838;IPI00977915;IPI00982087;IPI00922127;IPI01012802;IPI01009681	IPI00000877	yes	no	2,3	6.9168e-05	144.38	25	32	25	32
4408	55	FDTNSHNDDAIIK	13	0	1488.68	IPI00000889;IPI00218282;IPI00374406;IPI00218283;IPI00218284;IPI00374407	IPI00000889	yes	no	3	0.0822	64.64	1	1	1	1
573	56	AHQIAIDTYQEFEETYIPK	19	0	2295.11	IPI00000891;IPI00794867;IPI00025785;IPI00796496;IPI00790822;IPI00794519;IPI00332583;IPI00791056;IPI00374578;IPI00790280;IPI00797085;IPI00794876	IPI00000891	yes	no	3,4	2.0137e-36	171.08	15	18	15	18
4409	56	FDTNSHNHDAIIK	13	0	1510.72	IPI00000891;IPI00794867;IPI00025785;IPI00796496;IPI00790202;IPI00794519;IPI00374576;IPI00374579;IPI00789438;IPI00788823;IPI00795387;IPI00794064;IPI00792640;IPI00790817;IPI00022108;IPI01013228;IPI00022110;IPI00789214;IPI00374571;IPI00386440;IPI00791802	IPI00000891	yes	no	2,3,4	4.1755e-28	181.98	6	7	6	7
8128	56	IFDHAMIQAHR	11	0	1337.67	IPI00000891;IPI00794867;IPI00025785;IPI00794519;IPI00374576;IPI00374579;IPI00332583;IPI00791056;IPI00374578;IPI00790280;IPI00791205;IPI00797117;IPI00797061	IPI00000891	yes	no	2,3	1.6988e-60	225.67	24	23	24	23
10507	56	ISIIIIESWIEPVR	14	0	1666.97	IPI00000891;IPI00794867;IPI00025785;IPI00796496;IPI00790822;IPI00790202;IPI00332583;IPI00791056;IPI00374578;IPI00790280;IPI00797085;IPI00789650;IPI00792664;IPI00794876	IPI00000891	yes	no	2,3	1.3849e-40	186.02	2	2	2	2
15746	56	SMFANNIVYDTSDSDDYHIIK	21	0	2447.1	IPI00000891;IPI00794867;IPI00025785;IPI00796496;IPI00790822;IPI00790202;IPI00332583;IPI00791056;IPI00374578;IPI00790280;IPI00797085;IPI00789650;IPI00792664	IPI00000891	yes	no	3,4	3.5441e-119	237.3	8	8	8	8
1024	57	AMVEEMQGHIK	11	0	1271.6	IPI00000948;IPI00927756;IPI00927538	IPI00000948	yes	no	3	0.0021788	93.058	2	2	2	2
3702	57	EKPQQHNFTHR	11	1	1420.7	IPI00000948;IPI00927756;IPI00927538;IPI00924474;IPI00926878;IPI00927103	IPI00000948	yes	no	3,4	9.6166e-07	142.83	3	5	3	5
5781	57	GHSAAVHSFAFSNDSR	16	0	1688.77	IPI00000948;IPI00927756;IPI00927538	IPI00000948	yes	no	3,4	1.349e-05	102.73	1	2	1	2
11154	57	IWDTDVEYK	9	0	1167.54	IPI00000948;IPI00927756;IPI00927538	IPI00000948	yes	no	2	0.0013173	108.98	1	3	1	3
11155	57	IWDTDVEYKK	10	1	1295.64	IPI00000948;IPI00927756;IPI00927538	IPI00000948	yes	no	3	0.0043252	93.649	2	2	2	2
11754	57	KGEFQEVVR	9	1	1090.58	IPI00000948;IPI00927756;IPI00927538	IPI00000948	yes	no	3	0.047432	71.223	1	2	1	2
14665	57	REDGGYTFTATPEDFPK	17	1	1929.87	IPI00000948;IPI00927756;IPI00927538;IPI00924474	IPI00000948	yes	no	3	4.8291e-15	134.9	1	1	1	1
3922	58	EQYIYTK	7	0	943.465	IPI01015191;IPI00001091	IPI01015191	yes	no	2	0.012874	111.04	1	4	1	4
4134	58	EVIDKNDMVEIIGPR	15	1	1726.89	IPI01015191;IPI00001091	IPI01015191	yes	no	3	0.0071455	84.892		2		2
4135	58	EVIDKNDMVEIIGPRPFAEK	20	2	2299.19	IPI01015191;IPI00001091	IPI01015191	yes	no	4	0.055704	79.837		1		1
6773	58	HFEQAIER	8	0	1028.5	IPI01015191;IPI00001091	IPI01015191	yes	no	3	0.015846	86.953	1	1	1	1
8004	58	IEIMEFVNFIK	11	0	1381.73	IPI01015191;IPI00001091	IPI01015191	yes	no	2,3	1.8788e-31	186.72		2		2
11498	58	KDDSHWWSR	9	1	1215.54	IPI01015191;IPI00001091	IPI01015191	yes	no	2,3	0.12872	60.436	2	2	2	2
13421	58	NIETIQQEIGIEGENR	16	0	1841.91	IPI01015191;IPI00001091	IPI01015191	yes	no	3	8.8675e-35	179.39		4		4
17247	58	VAIIIIEK	8	0	897.59	IPI01015191;IPI00001091;IPI00074962;IPI00007834;IPI00305279;IPI00895856;IPI00966374;IPI00966009	IPI01015191	yes	no	2	4.8467e-05	151.75	6	8	6	8
17722	58	VHIRPIK	7	1	861.555	IPI01015191;IPI00001091;IPI00015171	IPI01015191	yes	no	2	0.051305	100.07	1		1
17944	58	VIKDEIDVK	9	1	1057.6	IPI01015191;IPI00001091	IPI01015191	yes	no	3	0.038165	85.67	2	3	2	3
8768	59	IIAPIIIIDK	10	0	1107.73	IPI00001145;IPI01011836	IPI00001145	yes	no	2	0.001521	104.17	3		3
724	60	AIGIVIR	7	0	740.491	IPI00001159	IPI00001159	yes	yes	2	0.012976	106.84	2	8	2	8
732	60	AIGTIVSHVTIR	12	0	1265.75	IPI00001159	IPI00001159	yes	yes	3	0.00050164	104.82	2	1	2	1
913	60	AIVAVIISR	9	0	940.607	IPI00001159	IPI00001159	yes	yes	2	0.030397	75.109		2		2
1472	60	AVMIIHTHTITSR	13	0	1478.8	IPI00001159	IPI00001159	yes	yes	3,4	0.0099415	82.171	4	1	4	1
1602	60	AYSDQAIVNIIK	12	0	1333.72	IPI00001159	IPI00001159	yes	yes	2,3	5.2708e-33	186.17		4		4
2017	60	DIAPYIPSVTPGIK	14	0	1469.81	IPI00001159	IPI00001159	yes	yes	2	0.10275	80.312		1		1
2149	60	DIIIPTIQK	9	0	1039.63	IPI00001159	IPI00001159	yes	yes	2	0.012869	85.676	2	2	2	2
2436	60	DPIPPIDPQAIKPIIK	16	1	1754.03	IPI00001159	IPI00001159	yes	yes	3	0.0028676	88.075		3		3
3038	60	EEFAIMQTPAGEIYDK	16	0	1840.86	IPI00001159	IPI00001159	yes	yes	3	5.5925e-09	121.76		4		4
5893	60	GIGIISIK	8	0	799.517	IPI00001159	IPI00001159	yes	yes	2	5.7329e-05	148.98	1	4	1	4
6120	60	GMGFIMR	7	0	810.388	IPI00001159	IPI00001159	yes	yes	2	0.0015395	159.65	2	2	2	2
6707	60	HAYIQCMIASYR	12	0	1511.7	IPI00001159	IPI00001159	yes	yes	3	1.7928e-24	174.98	2	3	2	3
6893	60	HIDQIIPR	8	0	990.561	IPI00001159	IPI00001159	yes	yes	3	0.00034509	130.27	1	2	1	2
7437	60	IAHGIIEEIK	10	0	1121.64	IPI00001159	IPI00001159	yes	yes	3	0.00037749	121.05		2		2
8121	60	IFCITIHR	8	0	1058.57	IPI00001159	IPI00001159	yes	yes	3	0.00089659	121.52	3	3	3	3
8209	60	IFIDHPHR	8	0	1033.55	IPI00001159	IPI00001159	yes	yes	2,3	0.015846	86.953	1	2	1	2
9301	60	IIPEIIPIIEEGIR	14	0	1603.95	IPI00001159	IPI00001159	yes	yes	2	1.9524e-05	124.21	1	1	1	1
9493	60	IITWVIGTGSPR	12	0	1298.73	IPI00001159	IPI00001159	yes	yes	2,3	1.4555e-24	176.95	14	14	14	14
9715	60	IMDEAVIAIR	10	0	1129.62	IPI00001159	IPI00001159	yes	yes	2	0.013891	78.939	1	1	1	1
9806	60	IMQQIIESDK	10	0	1203.62	IPI00001159	IPI00001159	yes	yes	2,3	0.0023674	99.815		5		5
10596	60	ISSIFVK	7	0	792.475	IPI00001159	IPI00001159	yes	yes	2	0.043449	81.297		2		2
10813	60	ITSADAIRPSVVSITGPIIR	20	1	2065.19	IPI00001159	IPI00001159	yes	yes	3	2.8958e-21	136.34	1	3	1	3
10999	60	IVIPSIIAAIEEESWR	16	0	1825	IPI00001159	IPI00001159	yes	yes	3	0.046108	96.464	1		1
11347	60	IYRPPPVIDAIGR	13	1	1465.84	IPI00001159	IPI00001159	yes	yes	3	0.0013151	110.08	1	1	1	1
11828	60	KGVTSIIPVIR	11	1	1181.75	IPI00001159	IPI00001159	yes	yes	3	1.2229e-07	148.32	3	6	3	6
12102	60	KITEWFK	7	1	950.523	IPI00001159	IPI00001159	yes	yes	3	0.071586	75.854	2		2
12646	60	MAAQIIGNMYSITDQK	16	0	1782.86	IPI00001159	IPI00001159	yes	yes	3	2.7048e-19	155.98	1	1	1	1
12970	60	MIWWANK	7	0	947.469	IPI00001159	IPI00001159	yes	yes	2,3	0.01236	117.7	4	8	4	8
14854	60	RIWVVK	6	1	799.507	IPI00001159	IPI00001159	yes	yes	3	0.050281	99.511	4	2	4	2
15333	60	SGAAQGIAEVMAGIGVEK	18	0	1686.86	IPI00001159	IPI00001159	yes	yes	3	1.6031e-49	187.37		6		6
17754	60	VIAFISSVAGDAITR	15	0	1518.84	IPI00001159	IPI00001159	yes	yes	3	0.010512	73.466	3		3
17978	60	VIPIEAIVTDAGEVTEAGK	19	0	1911.02	IPI00001159	IPI00001159	yes	yes	3	2.1589e-29	155.57		1		1
17982	60	VIPQIISTITASVQNPAIR	19	0	2020.17	IPI00001159	IPI00001159	yes	yes	3	0.053424	76.341	1		1
18626	60	VVIPYIVPK	9	0	1026.65	IPI00001159	IPI00001159	yes	yes	2,3	9.6858e-06	130.27	1	11	1	11
19600	60	YISHSEFK	8	0	1009.49	IPI00001159	IPI00001159	yes	yes	3	0.068092	67.032	1	1	1	1
19831	60	YSSDVQEMIISSATADR	17	0	1871.86	IPI00001159	IPI00001159	yes	yes	3	3.3509e-05	93.478		3		3
15391	61	SGTTIVIIK	9	0	930.575	IPI00001434;IPI01010271;IPI00910994	IPI00001434	yes	no	3	7.991e-05	123.98		5		5
59	62	AAIADVIR	8	0	827.486	IPI00893067;IPI00001466;IPI00854834	IPI00893067	yes	no	2	0.0023581	111.82		1		1
546	62	AHDGSVFTICQMR	13	0	1520.69	IPI00893067;IPI00001466;IPI00854834	IPI00893067	yes	no	3	0.00049849	108.9	1	2	1	2
2375	62	DMSIIQWK	8	0	1019.51	IPI00893067;IPI00001466;IPI00854834;IPI00893935	IPI00893067	yes	no	3	0.035229	75.38		2		2
3406	62	EIEVPDQYGTIR	12	0	1418.7	IPI00893067;IPI00001466;IPI00854834	IPI00893067	yes	no	2	5.2944e-09	140.24	1	1	1	1
6311	62	GRPITMFIPSDVDNYDDIR	19	1	2223.06	IPI00893067;IPI00001466;IPI00854834	IPI00893067	yes	no	3	8.4499e-44	176.25	4	5	4	5
6560	62	GVYQISK	7	0	793.433	IPI00893067;IPI00001466;IPI00854834	IPI00893067	yes	no	2	0.011889	119.57	1	5	1	5
8094	62	IEWAYGYR	8	0	1056.5	IPI00893067;IPI00001466;IPI00854834	IPI00893067	yes	no	2	0.00084973	122.13	2	3	2	3
9221	62	IIIWDHDINPER	12	0	1519.78	IPI00893067;IPI00001466;IPI00854834	IPI00893067	yes	no	3	1.0052e-24	179.57	2	1	2	1
11607	62	KEESHSNDQSPQIR	14	1	1653.77	IPI00893067;IPI00001466	IPI00893067	yes	no	4	0.094392	62.088	1		1
12031	62	KIIIWDHDINPER	13	1	1647.87	IPI00893067;IPI00001466;IPI00854834	IPI00893067	yes	no	4	0.0018062	99.752	2	2	2	2
17023	62	TTVEPTPGK	9	0	928.487	IPI00893067;IPI00001466;IPI00854834	IPI00893067	yes	no	2	0.00059562	113.71	1	1	1	1
17024	62	TTVEPTPGKGPK	12	1	1210.66	IPI00893067;IPI00001466;IPI00854834	IPI00893067	yes	no	3	0.0063062	93.096		3		3
17715	62	VHIFQYPCSK	10	0	1277.62	IPI00893067;IPI00001466;IPI00854834;IPI00893935	IPI00893067	yes	no	3	0.13589	56.916	1	1	1	1
18893	62	WFVIDAETR	9	0	1135.57	IPI00893067;IPI00001466;IPI00854834	IPI00893067	yes	no	2	0.0087662	91.069	1	1	1	1
19471	63	YIATINFVHR	10	0	1232.67	IPI00657861;IPI00001477;IPI00965006;IPI00219996;IPI00985399;IPI01011183;IPI00966862	IPI00657861	yes	no	3	2.5883e-28	189.38	3	5	3	5
1875	64	DFTATDISEFAAK	13	0	1414.66	IPI00001539	IPI00001539	yes	yes	2,3	4.6156e-36	186.17	3	10	3	10
2349	64	DMDIVEVNEAFAPQYIAVER	20	0	2308.1	IPI00001539	IPI00001539	yes	yes	3	4.8982e-43	163.91	3	2	3	2
6486	64	GVFVVAAK	8	0	789.475	IPI00001539	IPI00001539	yes	yes	2	3.561e-05	154.68	5	10	5	10
10654	64	ITAHIVHEIR	10	0	1187.68	IPI00001539	IPI00001539	yes	yes	2,3	4.0789e-29	195.79	6	5	6	5
11865	64	KHNFTPIAR	9	1	1082.6	IPI00001539	IPI00001539	yes	yes	2,3	9.5806e-06	104.2	6	3	6	3
14496	64	QTMQVDEHARPQTTIEQIQK	20	1	2380.18	IPI00001539	IPI00001539	yes	yes	4	0.023022	74.12	1	1	1	1
15012	64	RTPFGAYGGIIK	12	1	1278.71	IPI00001539	IPI00001539	yes	yes	3	7.8107e-25	181.68	5	6	5	6
15471	64	SIDIDISK	8	0	889.476	IPI00001539	IPI00001539	yes	yes	2	0.0095025	94.302	2	1	2	1
16848	64	TPFGAYGGIIK	11	0	1122.61	IPI00001539	IPI00001539	yes	yes	2,3	2.1737e-07	145.46		6		6
465	65	AGHDQVVVIIHDVR	14	0	1556.84	IPI00001578;IPI00792773;IPI00795592	IPI00001578	yes	no	3,4	0.00012503	112.44	2	2	2	2
9469	65	IITIFR	6	0	761.48	IPI00001578;IPI00792773;IPI00795592;REV__IPI00167305;REV__IPI00784159;REV__IPI00941092;REV__IPI00760874;REV__IPI00177644;REV__IPI00983823	IPI00001578	yes	no	2	0.0084621	137.2	7	11	7	11
12036	65	KIITIFR	7	1	889.575	IPI00001578;IPI00792773;IPI00795592	IPI00001578	yes	no	3	0.03128	91.906	4	2	4	2
1423	66	AVFFPGNQEKDPIIK	15	1	1701.91	IPI00470529;IPI00940949;IPI00001592;IPI01015913;IPI01011302;IPI00979896;IPI00910425;IPI01010058	IPI00470529	yes	no	3	0.085594	92.19	1		1
1610	66	AYVPIAQVK	9	0	987.575	IPI00470529;IPI00940949;IPI00001592;IPI01015913;IPI01011302;IPI00979896;IPI00910425	IPI00470529	yes	no	2,3	8.6478e-07	138.54	6	17	6	17
2702	66	DVYVVTDQIPVFVTMFQK	18	0	2128.09	IPI00470529;IPI00940949;IPI00001592;IPI01015913;IPI01011302;IPI00979896	IPI00470529	yes	no	2,3,4	2.4068e-39	176.29	4	4	4	4
13243	67	NAIDPMSVIIAR	12	0	1298.7	IPI00399307;IPI00001593;IPI00980998	IPI00399307	yes	no	2,3	2.4882e-25	183.99	4		4
17351	67	VDHFGFNTVK	10	0	1162.58	IPI00399307;IPI00001593;IPI00983889;IPI00976115	IPI00399307	yes	no	3	0.0013758	105.4	1	2	1	2
19945	67	YYGESIPFGDNSFK	14	0	1622.73	IPI00399307;IPI00001593;IPI00980998;IPI00983889;IPI00976115;IPI00982987;IPI00983229;IPI00982909;IPI00981533;IPI00985278;IPI00982181	IPI00399307	yes	no	3	0.015553	75.739	1	4	1	4
116	68	AAVENIPTFIVEISR	15	0	1657.9	IPI00001639	IPI00001639	yes	yes	2,3	6.033e-33	181.98	6	10	6	10
2562	68	DTAAWTVGR	9	0	975.477	IPI00001639;IPI01010020;IPI00922792	IPI00001639	yes	no	2	0.012113	86.67		6		6
3298	68	EHIKNPDWR	9	1	1193.59	IPI00001639;IPI01010020;IPI00922792	IPI00001639	yes	no	2	0.021337	93.178	1	1	1	1
5334	68	GAIQYIVPIITQTITK	16	0	1758.03	IPI00001639;IPI01010020	IPI00001639	yes	no	3	2.9416e-26	168.76	15	6	15	6
5438	68	GDQENVHPDVMIVQPR	16	0	1832.88	IPI00001639;IPI01010020;IPI00922792	IPI00001639	yes	no	3	4.5496e-08	113.53		2		2
7352	68	IAATNAIINSIEFTK	15	0	1604.88	IPI00001639;IPI01010020;IPI00922792	IPI00001639	yes	no	2,3	2.3887e-68	209.56	4	6	4	6
8961	68	IIETTDRPDGHQNNIR	16	1	1877.93	IPI00001639;IPI01010020;IPI00922792	IPI00001639	yes	no	3,4	1.8303e-05	103.76	5	4	5	4
10314	68	IQQVIQMESHIQSTSDR	17	0	1998.98	IPI00001639;IPI01010020;IPI00922792	IPI00001639	yes	no	3	2.8603e-74	213.67	1	2	1	2
11605	68	KEEPSNNVK	9	1	1043.52	IPI00001639;IPI01010020;IPI00922792	IPI00001639	yes	no	3	6.4801e-14	162.88	2	7	2	7
13711	68	NSITSKDPDIK	11	1	1216.63	IPI00001639	IPI00001639	yes	yes	3	0.0053051	96.015		5		5
13908	68	PMIHEIITEGR	11	0	1294.67	IPI00001639;IPI01010020;IPI00922792	IPI00001639	yes	no	3	0.00059346	106.2		2		2
15205	68	SDYDMVDYINEIR	13	0	1631.71	IPI00001639;IPI01010020;IPI00922792	IPI00001639	yes	no	2,3	3.9116e-21	168.3	2	3	2	3
15778	68	SNEIITAIIQGMR	13	0	1444.77	IPI00001639;IPI01010020;IPI00922792	IPI00001639	yes	no	2,3	1.1053e-36	194.39	20	19	20	19
15923	68	SSAYESIMEIVK	12	0	1355.66	IPI00001639;IPI01010020;IPI00922792	IPI00001639	yes	no	2,3	1.1149e-17	164.9	8	12	8	12
16556	68	TIATWATK	8	0	890.486	IPI00001639;IPI01010020;IPI00922792	IPI00001639	yes	no	2	0.00032195	131.06	1	7	1	7
17005	68	TTIVIMER	8	0	961.527	IPI00001639;IPI01010020;IPI00922792	IPI00001639	yes	no	2	0.041983	72.485	2	3	2	3
17099	68	TVSPDRIEIEAAQK	14	1	1555.82	IPI00001639	IPI00001639	yes	yes	3	2.1222e-24	173.72	1	8	1	8
17183	68	VAAGIQIK	8	0	798.496	IPI00001639	IPI00001639	yes	yes	2	0.0012325	117.16	2	5	2	5
17186	68	VAAIQNIVK	9	0	954.586	IPI00001639;IPI01010020;IPI00922792	IPI00001639	yes	no	2	7.6737e-08	143.01	1	3	1	3
18928	68	WIAIDANAR	9	0	1028.54	IPI00001639	IPI00001639	yes	yes	2	0.012869	85.676		1		1
19500	68	YIEVVINTIQQASQAQVDK	19	0	2146.13	IPI00001639;IPI01010020;IPI00922792	IPI00001639	yes	no	3	3.4539e-09	111.22	1		1
15619	69	SIPTIISR	8	0	885.528	IPI00001661;IPI00787306;IPI00747309	IPI00001661	yes	no	2	0.023913	80.229	1	2	1	2
15771	69	SMVPVQVQIDVPVVK	15	0	1636.92	IPI00001661;IPI00787306;IPI00747309;IPI00925791;IPI00926548;IPI00925317;IPI00927389;IPI00925570	IPI00001661	yes	no	3	0.008014	76.262	3	2	3	2
17578	69	VFIWGSFR	8	0	1010.53	IPI00001661;IPI00787306;IPI00747309;IPI00925791;IPI00926548;IPI00925317;IPI00927389;IPI00925570	IPI00001661	yes	no	2	0.00033063	130.77	4	4	4	4
18647	69	VVQVSAGDSHTAAITDDGR	19	0	1897.91	IPI00001661;IPI00787306;IPI00747309;IPI00925791;IPI00926548;IPI00925317;IPI00927389;IPI00925570	IPI00001661	yes	no	3	2.3317e-14	124.25		6		6
15911	70	SQYNFIADVVEK	12	0	1411.7	IPI00001663;IPI00220543;IPI00220544;IPI00220542	IPI00001663	yes	no	3	0.0033881	90.653		4		4
4634	71	FIDFWR	6	0	882.439	IPI00001676;IPI00975546;IPI00290543;IPI01013928	IPI00001676	yes	no	2	0.024262	114.67	11	11	11	11
7217	71	HVDNIMFENHTVADR	15	0	1796.83	IPI00001676;IPI00975546;IPI00290543;IPI01013928	IPI00001676	yes	no	3,4	1.0112e-55	206.32	3	2	3	2
12414	71	KTGNQHFGYIYGR	13	1	1539.76	IPI00001676;IPI00975546;IPI00290543;IPI01013928	IPI00001676	yes	no	3,4	0.0057963	89.805	7	3	7	3
12494	71	KVGWIFTDIVSEDTR	15	1	1764.9	IPI00001676;IPI00975546;IPI00290543;IPI01013928	IPI00001676	yes	no	3	3.982e-06	120.87	2	2	2	2
16472	71	TGNQHFGYIYGR	12	0	1411.66	IPI00001676;IPI00975546;IPI00290543;IPI01013928	IPI00001676	yes	no	3	0.087759	59.542	2	3	2	3
17686	71	VGWIFTDIVSEDTR	14	0	1636.81	IPI00001676;IPI00975546;IPI00290543;IPI01013928	IPI00001676	yes	no	3	0.00014025	111.52	2		2
274	72	AEHIIIWMSK	10	0	1226.65	IPI00955011;IPI00001690	IPI00955011	yes	no	3	0.0046912	90.629	1	1	1	1
5217	72	FWPIIQIR	8	0	1071.62	IPI00955011;IPI00001690;IPI00744001;IPI00965943;IPI00402732	IPI00955011	yes	no	2	0.020665	81.784	2	2	2	2
13929	72	PTFWPVFR	8	0	1048.55	IPI00955011;IPI00001690	IPI00955011	yes	no	2	0.091999	63.565	2	3	2	3
16576	73	TIEDDIVSAIVR	12	0	1329.71	IPI00619930;IPI00001716;IPI01012093;IPI00795171;IPI01010630;IPI01009817;IPI01009394;IPI01009368;IPI01010216	IPI00619930	yes	no	2	5.0253e-09	140.78	3		3
17182	73	VAAFKEEHIYPTIIGTER	18	1	2073.09	IPI00619930;IPI00001716;IPI01012093;IPI00795171	IPI00619930	yes	no	4	0.14708	64.675	1	1	1	1
1769	74	DDIIGFAIR	9	0	1018.54	IPI00001734;IPI00219478;IPI01014011	IPI00001734	yes	no	2	9.1808e-08	141.48	1	2	1	2
12515	75	KVIYSQPSAR	10	1	1147.63	IPI00922511;IPI00001754;IPI00940512;IPI00069985;IPI00922549	IPI00922511	yes	no	3	0.10955	61.56	1	3	1	3
18487	75	VTFIPTGITFK	11	0	1222.7	IPI00922511;IPI00001754;IPI00940512;IPI00069985	IPI00922511	yes	no	2,3	2.4536e-16	169.93	5	20	5	20
4303	76	FAEYGEIK	8	0	955.465	IPI00001757;IPI00216659	IPI00001757	yes	no	2,3	0.0010774	119.17		8		8
6674	76	GYTIVEYETYK	11	0	1364.65	IPI00001757;IPI00216659	IPI00001757	yes	no	2,3	6.547e-42	201.84	3	11	3	11
13081	76	MREDYDSVEQDGDEPGPQR	19	1	2221.92	IPI00001757;IPI00216659	IPI00001757	yes	no	3	6.715e-95	228.84		7		7
13454	76	NIHINIDR	8	0	993.536	IPI00001757;IPI00216659	IPI00001757	yes	no	2,3	0.0084798	96.253	4	4	4	4
7465	77	IAIGYHFIR	9	0	1088.61	IPI00001849;IPI00887412	IPI00001849	yes	no	3	0.00011358	122.13	2	1	2	1
14557	78	QVTTINAHR	9	0	1038.56	IPI00001869	IPI00001869	yes	yes	3	0.10614	60.436		1		1
18632	78	VVNIYEDDHKNPTVTR	16	1	1898.95	IPI00001869	IPI00001869	yes	yes	4	0.054796	68.972	1	1	1	1
19165	78	WYPHPAIIHCVK	12	0	1519.78	IPI00001869;IPI01015619	IPI00001869	yes	no	3,4	0.00020511	112.75	6	6	6	6
19325	78	YFFSIK	6	0	803.422	IPI00001869	IPI00001869	yes	yes	2	0.031234	103.41	3	5	3	5
9804	79	IMQDKEEMIGK	11	1	1320.64	IPI00001871	IPI00001871	yes	yes	3	0.013351	87.258	1	3	1	3
16967	79	TSSGIGGSTTDFIEEWK	17	0	1813.84	IPI00001871	IPI00001871	yes	yes	3	5.8724e-13	122.33		3		3
4428	80	FEEEFIK	7	0	940.454	IPI00001883;IPI01013758	IPI00001883	yes	no	2	0.012494	117.17		2		2
4577	80	FGSAIPIPSIPDK	13	0	1340.73	IPI00001883;IPI01013758;IPI00744897	IPI00001883	yes	no	3	0.0055967	88.596		3		3
5605	80	GFIGCFPDIIGTHK	14	0	1560.78	IPI00001883;IPI01013758	IPI00001883	yes	no	3	0.00010932	113.38	2	3	2	3
6768	80	HFDWIYER	8	0	1164.54	IPI00001883;IPI01013758;IPI00744897	IPI00001883	yes	no	2,3	0.0023581	111.82	4	4	4	4
10152	80	IQAWMTR	7	0	904.459	IPI00001883;IPI01013758	IPI00001883	yes	no	2	0.012496	117.16	1	4	1	4
11249	80	IYDYNSVIR	9	0	1141.58	IPI00001883;IPI01013758	IPI00001883	yes	no	2	0.0031429	102.07		2		2
17136	80	TYEEIASIVAEQPK	14	0	1576.8	IPI00001883;IPI01013758	IPI00001883	yes	no	3	1.0363e-10	142.1		4		4
18415	80	VSIMSYAIQAEMNHFHSNR	19	0	2234.04	IPI00001883;IPI01013758	IPI00001883	yes	no	3,4	1.5512e-20	130.27	13	9	13	9
4261	81	EYNVYQHDEI	10	0	1308.56	IPI00001914;IPI00218686;IPI01009357	IPI00001914	yes	no	2	0.0016417	103.55		3		3
11608	81	KEESTEEVK	9	1	1077.52	IPI00001914;IPI00218686;IPI01009357;IPI00942796;IPI00917595	IPI00001914	yes	no	3	0.0050643	99.802		5		5
11739	81	KGDIINAHYDGYIAK	15	1	1676.85	IPI00001914;IPI00218686;IPI01009357;IPI00942796;IPI00917595	IPI00001914	yes	no	4	2.1693e-05	105.65	2	1	2	1
16188	81	SYQDAVIEDIFK	12	0	1426.7	IPI00001914;IPI00218686;IPI01009357	IPI00001914	yes	no	3	0.00010863	115.33	2	2	2	2
16189	81	SYQDAVIEDIFKK	13	1	1554.79	IPI00001914;IPI00218686;IPI01009357	IPI00001914	yes	no	3	0.011227	83.182	2	2	2	2
9578	82	IIYSGVPFIGPYHK	14	0	1589.86	IPI00001922	IPI00001922	yes	yes	3	0.000441	101.89	2	3	2	3
14758	82	RHPGFEATFFQIPR	14	1	1701.87	IPI00001922;IPI00985102	IPI00001922	yes	no	3	0.0054287	85.845	2		2
2505	83	DRIPVYSAFR	10	1	1222.65	IPI00001952	IPI00001952	yes	yes	3	0.0070258	99.802	1	1	1	1
19171	83	WYVNIHSIMDR	11	0	1432.69	IPI00001952	IPI00001952	yes	yes	2,3	2.453e-07	144.77	18	16	18	16
3029	84	EEDKEPIIEIFVK	13	1	1587.84	IPI00001960;IPI01010396	IPI00001960	yes	no	3	4.643e-15	153.34	3	3	3	3
7073	84	HPESNTAGMDIFAK	14	0	1516.7	IPI00001960;IPI00903323;IPI01010396	IPI00001960	yes	no	3	5.1153e-11	146.5	3	6	3	6
7734	84	IDEYINSPIPDEIDENSMEDIK	22	0	2578.16	IPI00001960;IPI00903323;IPI01010396	IPI00001960	yes	no	3,4	4.176e-70	185.55	2	2	2	2
11699	84	KFIDGNEMTIADCNIIPK	18	1	2078.02	IPI00001960;IPI00903323;IPI01010396	IPI00001960	yes	no	3	4.1985e-16	104.41	1		1
12198	84	KPADIQNIAPGTHPPFITFNSEVK	24	1	2620.36	IPI00001960;IPI00903323;IPI01010396	IPI00001960	yes	no	4	9.2809e-56	171.79	4	4	4	4
13323	84	NFDIPK	6	0	732.381	IPI00001960;IPI00903323;IPI00022974	IPI00001960	yes	no	2	0.047862	97.071	1	6	1	6
1593	85	AYNHHIQEIQR	11	0	1407.7	IPI00001985;IPI00793483	IPI00001985	yes	no	3,4	0.0021711	93.111	3	2	3	2
8263	85	IFQFIGR	7	0	879.497	IPI00001985;IPI00333553	IPI00001985	yes	no	2	0.020126	97.071	5	10	5	10
742	86	AIHSVIQAVPINEIR	15	0	1658.95	IPI00002134;IPI00909766;IPI00983122	IPI00002134	yes	no	3	2.5369e-06	122.46	2	1	2	1
8527	86	IGPIFSIINENHR	13	0	1508.81	IPI00002134;IPI00909766;IPI00983122	IPI00002134	yes	no	3	3.224e-58	212.09	7	6	7	6
9751	86	IMFNSPGFVEYVVDR	15	0	1771.86	IPI00002134;IPI00909766	IPI00002134	yes	no	2	5.9018e-06	115.82	2	2	2	2
13132	86	MTESWFSSISR	11	0	1329.6	IPI00002134;IPI00909766;IPI00607835	IPI00002134	yes	no	2	1.7281e-05	134.57	2	2	2	2
16539	86	TIAEIFGNPNYIR	13	0	1506.78	IPI00002134;IPI00909766	IPI00002134	yes	no	3	1.7528e-28	183.99	2	3	2	3
3740	87	EMFGIYGQTTGK	12	0	1330.62	IPI00002149;IPI00966157;IPI00967559;IPI00964747	IPI00002149	yes	no	2	1.5179e-07	137.16	2	2	2	2
7844	87	IDRPEAISEER	11	1	1313.66	IPI00002149;IPI00966157;IPI00967559;IPI00964747	IPI00002149	yes	no	3	0.044696	77.192	1	4	1	4
12749	88	MEIITAIIR	9	0	1058.62	IPI00002150;IPI00514624	IPI00002150	yes	no	2	0.0087662	91.069	5		5
13974	88	QAIIWIIGVHGER	13	0	1490.84	IPI00002150;IPI00514624	IPI00002150	yes	no	3	1.6824e-10	143.97	2	2	2	2
19686	88	YMTQGIDMSGVFMEMVK	17	0	1965.87	IPI00002150;IPI00922864;IPI00643929	IPI00002150	yes	no	3	0.16565	13.063	1		1
3465	89	EIIEHGIEIFNK	12	0	1440.76	IPI00002186;IPI01011126	IPI00002186	yes	no	3	0.0094434	80.763	1	1	1	1
11184	89	IWHVIGDHFNK	11	0	1364.7	IPI00002186	IPI00002186	yes	yes	4	0.00062196	105.52	5	4	5	4
17000	89	TTIPHVIITWR	11	0	1335.77	IPI00002186	IPI00002186	yes	yes	3	0.061269	64.73	1	3	1	3
3469	90	EIIEQGIDIFNK	12	0	1417.75	IPI00002188;IPI00984763	IPI00002188	yes	no	3	4.5857e-07	132.76		4		4
12775	90	MFIEGFR	7	0	898.437	IPI00002188;IPI00984763	IPI00002188	yes	no	2	0.039385	83.614	1	1	1	1
15389	90	SGTNCIENVVIINGEK	16	0	1745.86	IPI00002188;IPI00984763;IPI00973992	IPI00002188	yes	no	3	0.055237	62.287		4		4
9380	91	IIQQIFIK	8	0	1001.63	IPI00220152;IPI00002203;IPI00068254;IPI00786906;IPI00909058	IPI00220152	yes	no	2,3	5.8871e-05	148.38	10	18	10	18
9777	92	IMIIDATFR	9	0	1078.58	IPI00924788;IPI00002230;IPI00927596	IPI00924788	yes	no	2	0.0087662	91.069	4	4	4	4
11054	92	IVQEIPQIIDAR	12	0	1393.79	IPI00924788;IPI00002230;IPI00790972	IPI00924788	yes	no	2,3	5.9342e-05	118.9	2	13	2	13
13854	92	NYKPVVQTTGNAR	13	1	1446.76	IPI00924788;IPI00002230;IPI00790972	IPI00924788	yes	no	3	0.00041675	117.52		3		3
15117	92	SAPIIADQAVIQIIPK	16	0	1675.99	IPI00924788;IPI00002230;IPI00790972	IPI00924788	yes	no	3	1.5806e-07	105.03		6		6
18743	92	VYFPEQIHDVVR	12	0	1500.77	IPI00924788;IPI00002230;IPI00790972	IPI00924788	yes	no	3	1.1472e-17	164.64	1	1	1	1
19334	92	YFIKPEVIQK	10	1	1263.72	IPI00924788;IPI00002230;IPI00790972	IPI00924788	yes	no	3	0.0033993	108.43	2	3	2	3
19930	92	YWVDYFK	7	0	1019.48	IPI00924788;IPI00002230;IPI00790972	IPI00924788	yes	no	2,3	0.01108	122.78	17	18	17	18
11369	93	IYVIGGNHFR	10	0	1174.62	IPI00002398;IPI00644859;IPI00930469;IPI00930551;IPI00002249;IPI00930289;IPI01011490	IPI00002398	yes	no	3	0.00047474	118.5	2	2	2	2
7889	94	IDYWEDDIR	9	0	1223.55	IPI00002255;IPI00945818;IPI00967340;IPI00964281;IPI00328195;IPI00964042;IPI01011585;IPI01010645;IPI00939641	IPI00002255	yes	no	2	0.024515	77.732		2		2
9280	94	IINIITDK	8	0	928.559	IPI00002255;IPI00945818;IPI00967340;IPI00964281	IPI00002255	yes	no	2	0.021423	81.296	1	1	1	1
9991	94	IPEFNWSQMHQR	12	0	1571.73	IPI00002255;IPI00945818;IPI00967340	IPI00002255	yes	no	3	0.0025864	92.19	1	1	1	1
17765	94	VIATIIR	7	0	784.517	IPI00002255;IPI00945818;IPI00967340	IPI00002255	yes	no	2	0.022863	94.163		4		4
18940	94	WIFTEIR	7	0	963.518	IPI00002255;IPI00945818;IPI00967340;IPI00964281	IPI00002255	yes	no	2	0.012282	118.01	2	2	2	2
566	95	AHIIIFK	7	0	840.522	IPI00002270;IPI01014584	IPI00002270	yes	no	2,3	0.0048411	150.82	7	7	7	7
19391	95	YGIFQYDGPI	10	0	1171.56	IPI00002270;IPI01014584	IPI00002270	yes	no	2	8.6931e-06	138.54	1	3	1	3
11271	96	IYGFVHR	7	0	890.476	IPI00002276	IPI00002276	yes	yes	2	0.053606	77.748	3	5	3	5
17701	96	VHFGNHVVMNR	11	0	1308.65	IPI00002276	IPI00002276	yes	yes	2,3	5.3574e-32	194.06	6	5	6	5
3149	97	EFQQNNWHAVGCGFR	15	0	1848.81	IPI00002324;IPI00181717;IPI00845510;IPI00845294;IPI00974257;IPI00845444;IPI00981635	IPI00002324	yes	no	3	0.00048309	92.039	1	1	1	1
3972	97	ESIWPFIIDK	10	0	1246.66	IPI00002324;IPI00181717;IPI00845510;IPI00921893	IPI00002324	yes	no	3	8.9374e-05	130.96	3	2	3	2
3735	98	EMESIWNIQK	10	0	1276.61	IPI00002349	IPI00002349	yes	yes	3	0.0013758	105.4		4		4
4254	99	EYIDNVQIGHIIER	14	0	1697.87	IPI00908804;IPI00002372;IPI01015425;IPI00185503	IPI00908804	yes	no	3	4.7973e-24	172.76	3	2	3	2
6853	99	HHEYYIHMDGR	11	0	1456.63	IPI00908804;IPI00002372;IPI01015425;IPI00185503	IPI00908804	yes	no	3,4	0.021401	73.887	5	2	5	2
8340	99	IFYVPQRPYMTIGTIR	16	1	1954.05	IPI00908804;IPI00002372;IPI01015425;IPI00185503	IPI00908804	yes	no	3	9.9785e-09	124.21	5	5	5	5
10689	99	ITEIMQVIK	9	0	1073.62	IPI00908804;IPI00002372;IPI01015425;IPI00185503	IPI00908804	yes	no	2	5.2753e-05	125.48	3	4	3	4
16019	99	STHSEIIEDYYQSGR	15	0	1783.8	IPI00908804;IPI00002372;IPI01015425	IPI00908804	yes	no	3	2.0839e-43	193.81	1	1	1	1
17848	99	VIGEIWPIFGGR	12	0	1342.74	IPI00908804;IPI00002372;IPI01015425;IPI00185503	IPI00908804	yes	no	2,3	5.4065e-25	182.28	12	5	12	5
430	100	AGAAGTAEATAR	12	0	1045.52	IPI00002406;IPI00554618	IPI00002406	yes	no	2	0.16291	54.259	1	2	1	2
1931	100	DGISCEASNPHGNKR	15	1	1640.73	IPI00002406;IPI00554618	IPI00002406	yes	no	4	0.014827	71.548	1	1	1	1
5409	100	GDGSPSPEYTIFR	13	0	1424.66	IPI00002406;IPI00554618	IPI00002406	yes	no	2	7.4914e-05	122.33		5		5
8088	100	IEVPVEMNPEGYMTSR	16	0	1850.85	IPI00002406;IPI00554618	IPI00002406	yes	no	2,3	1.2625e-10	131.35	2	7	2	7
10630	100	ISVPPIVEVMR	11	0	1238.71	IPI00002406;IPI00554618	IPI00002406	yes	no	2	0.00083804	103.26	2	7	2	7
17304	100	VAYIDPIEISEGK	13	0	1432.74	IPI00002406;IPI00554618	IPI00002406	yes	no	2,3	1.0952e-06	130.56	2	13	2	13
17427	100	VEDYDAADDVQISK	14	0	1566.7	IPI00002406;IPI00554618	IPI00002406	yes	no	2	6.8658e-08	138.02	1	1	1	1
5790	101	GHWDDVFIDSTQR	13	0	1574.71	IPI00002408;IPI00924947	IPI00002408	yes	no	3	0.0050508	89.403	2	2	2	2
9070	101	IIHDFYIEK	9	0	1176.62	IPI00002408;IPI00924947;IPI00448515	IPI00002408	yes	no	3	0.0010029	111.04	2	1	2	1
10300	102	IQQGYNAMGFSQGGQFIR	18	0	2000.95	IPI00514424;IPI00002412;IPI00514248;IPI00980279;IPI00981623	IPI00514424	yes	no	3	3.0759e-24	155.57		2		2
11050	102	IVQAEYWHDPIKEDVYR	17	1	2160.06	IPI00514424;IPI00002412;IPI00514248;IPI00908718	IPI00514424	yes	no	3,4	5.299e-48	186.05	4	5	4	5
1801	103	DENQSINHQMAQEDAQR	17	0	2012.86	IPI00002460;IPI00021771;IPI00953297;IPI01011531	IPI00002460	yes	no	3	4.1222e-23	153.09		6		6
5601	103	GFGTDEQAIVDVVANR	16	0	1689.83	IPI00002460;IPI00021771;IPI00953297;IPI01011531	IPI00002460	yes	no	3	1.2561e-34	176.87	2	8	2	8
9113	103	IIIAIVGQ	8	0	825.532	IPI00002460;IPI00021771;IPI00953297;IPI01011531	IPI00002460	yes	no	2	7.4986e-05	142.11	1	6	1	6
16655	103	TIIQCAINRPAFFAER	16	1	1905.99	IPI00002460;IPI00021771;IPI00953297;IPI01011531	IPI00002460	yes	no	3	0.00014612	97.69	1	1	1	1
976	104	AKPIMEIIER	10	1	1198.67	IPI00002478;IPI00216762;IPI00216758;IPI00216760;IPI00514800	IPI00002478	yes	no	3	0.03308	80.239	2	1	2	1
2387	104	DNFQDTIQVVTAHYR	15	0	1805.87	IPI00002478;IPI00216762;IPI00216758;IPI00216760;IPI00514800	IPI00002478	yes	no	3	1.8318e-17	160.27	1	1	1	1
18910	104	WGTFSNIWEHNQAIIK	16	0	1942.97	IPI00002478;IPI00216762;IPI00216758;IPI00216760;IPI00514800;IPI00984937	IPI00002478	yes	no	3	0.010798	72.321	2	1	2	1
13767	105	NVEGVEEVHEIHVWQIAGSR	20	0	2287.13	IPI00002483	IPI00002483	yes	yes	4	1.1585e-15	127.29	1	1	1	1
6784	106	HFIPADYIESTEEFIR	16	0	1965.95	IPI00306791;IPI00807389;IPI00010555;IPI00454951;IPI00010554;IPI00334908;IPI00186452;IPI00064591;IPI00002491;IPI00654848;IPI00454950;IPI00426075;IPI00922621;IPI00383430	IPI00306791	yes	no	3	1.687e-26	170.95	3	3	3	3
13664	106	NPVDYMDIPFSSSPSR	16	0	1810.82	IPI00306791;IPI00807389;IPI00010555;IPI00454951;IPI00010554;IPI00334908;IPI00186452;IPI00064591;IPI00002491;IPI00654848;IPI00454950;IPI00426075	IPI00306791	yes	no	2	0.02156	68.413		2		2
14213	106	QIDQNWYEGEHHGR	14	0	1767.77	IPI00306791;IPI00807389;IPI00010555;IPI00454951;IPI00010554;IPI00334908;IPI00186452;IPI00064591;IPI00002491;IPI00654848;IPI00454950;IPI00426075	IPI00306791	yes	no	4	0.014637	76.326	2		2
5149	107	FVEKPQVFVSNK	12	1	1420.77	IPI00002496;IPI00030920	IPI00002496	yes	no	3	0.00070714	111.86	2	3	2	3
10557	107	ISMSHEEEPIGTAGPIAIAR	20	0	2078.05	IPI00002496;IPI00030920	IPI00002496	yes	no	3	3.7235e-43	166.3		2		2
15432	107	SHSWIESCIVGWR	13	0	1615.76	IPI00002496;IPI00030920	IPI00002496	yes	no	3	1.1426e-10	146.16	2	2	2	2
4048	108	ETIPSIWDSPTK	12	0	1372.69	IPI00002506;IPI00909046;IPI00909749	IPI00002506	yes	no	2	2.4503e-09	145.91	2	2	2	2
4497	108	FFINAK	6	0	738.406	IPI00002506;IPI00909046;IPI00909749	IPI00002506	yes	no	2	0.055522	94.151		4		4
14838	108	RIPVMMDEAISYIEK	15	1	1793.91	IPI00002506;IPI00909046;IPI00909749	IPI00002506	yes	no	3	0.029486	66.393	1		1
18055	108	VITIVK	6	0	671.458	IPI00002506;IPI00909046;IPI00909749	IPI00002506	yes	no	2	0.054164	94.669	1	4	1	4
870	109	AISEAITEIGYK	12	0	1293.68	IPI00002519;IPI00220668;IPI01015924;IPI00793862	IPI00002519	yes	no	3	0.024131	72.2	1	3	1	3
17236	109	VAHFIHR	7	0	878.488	IPI00002519;IPI00220668;IPI01015924;IPI00220669	IPI00002519	yes	no	2	0.027126	91.093	1	2	1	2
394	110	AFPMPGFDEH	10	0	1146.48	IPI00002520;IPI00789370;IPI00794572;IPI00795816;IPI00748411;IPI00909681;IPI00908824;IPI00794549	IPI00002520	yes	no	2	2.3226e-05	137.18		4		4
565	110	AHIIADMAHISGIVAAK	17	0	1716.93	IPI00002520;IPI00789370;IPI00794572;IPI00795816;IPI00748411;IPI00909681;IPI00908824;IPI00794549	IPI00002520	yes	no	4	0.081484	58.831	7		7
3551	110	EIPYTFEDR	9	0	1168.54	IPI00002520;IPI00789370;IPI00794572;IPI00795816;IPI00748411;IPI00909681;IPI00908824;IPI00794549	IPI00002520	yes	no	2	0.00086412	111.95		5		5
4273	110	EYSIQVIK	8	0	978.539	IPI00002520;IPI00789370;IPI00794572;IPI00795816;IPI00748411;IPI00908824;IPI00794549	IPI00002520	yes	no	2	0.0016144	114.89	2	5	2	5
6596	110	GWTGQESISDSDPEMWEIIQR	21	0	2463.1	IPI00002520;IPI00789370;IPI00794572;IPI00795816;IPI00909681	IPI00002520	yes	no	3	1.6765e-137	246.21	4	4	4	4
6671	110	GYSIVSGGTDNHIVIVDIRPK	21	1	2239.2	IPI00002520;IPI00789370;IPI00794572;IPI00795816;IPI00748411;IPI00909681;IPI00908824;IPI00794549	IPI00002520	yes	no	4	0.001067	82.007	1	1	1	1
6686	110	HADIVTTTTHK	11	0	1222.63	IPI00002520;IPI00789370;IPI00794572;IPI00795816;IPI00748411;IPI00909681;IPI00908824;IPI00794549	IPI00002520	yes	no	2,3,4	2.3694e-05	132.78	3	1	3	1
9110	110	IIIAGTSAYAR	11	0	1134.64	IPI00002520;IPI00789370;IPI00794572;IPI00795816;IPI00748411;IPI00909681;IPI00908824;IPI00794549	IPI00002520	yes	no	2	0.015076	77.192	1	6	1	6
15366	110	SGIIFYR	7	0	854.465	IPI00002520;IPI00789370;IPI00794572;IPI00795816;IPI00748411;IPI00909681;IPI00908824;IPI00794549	IPI00002520	yes	no	2	0.058512	76.035	3	7	3	7
16466	110	TGIIDYNQIAITAR	14	0	1547.83	IPI00002520;IPI00789370;IPI00794572;IPI00748411;IPI00909681;IPI00908824;IPI00794549	IPI00002520	yes	no	2,3	4.4046e-07	131.35		6		6
17814	110	VIEIVSITANK	11	0	1185.7	IPI00002520;IPI00789370;IPI00794572;IPI00795816;IPI00748411;IPI00909681;IPI00908824;IPI00794549	IPI00002520	yes	no	2,3	1.5451e-17	173.64	4	10	4	10
19807	110	YSEGYPGK	8	0	899.403	IPI00002520;IPI00789370;IPI00794572;IPI00795816	IPI00002520	yes	no	2	0.019526	83.005		2		2
4424	111	FEDPKFEVIEKPQA	14	2	1675.85	IPI00456008;IPI00002521	IPI00456008	yes	no	3	0.0040321	108.7	1	3	1	3
14374	111	QMFGNADMNTFPTFK	15	0	1747.77	IPI00456008;IPI00002521;IPI00794158	IPI00456008	yes	no	3	0.00013883	97.273		6		6
3372	112	EIEAIDEVFTK	11	0	1292.65	IPI00002525	IPI00002525	yes	yes	2,3	8.1227e-32	192.55	1	14	1	14
5350	112	GAPYNAITGK	10	0	990.513	IPI00002525	IPI00002525	yes	yes	2	0.013451	79.148	1	2	1	2
6549	112	GVVFDVTSGK	10	0	1007.53	IPI00002525	IPI00002525	yes	yes	2	1.2476e-15	163.32	2	4	2	4
8295	112	IFTEEEIAR	9	0	1106.56	IPI00002525	IPI00002525	yes	yes	2	0.0049828	98.033		3		3
19381	112	YGGEEEDQPIYIAVK	15	0	1709.81	IPI00002525	IPI00002525	yes	yes	3	0.013219	70.438		4		4
6572	113	GWDQGIIGMCEGEK	14	0	1578.68	IPI00002535;IPI01013732	IPI00002535	yes	no	2	8.0766e-12	150.12		4		4
7918	113	IEDGTEFDSSIPQNQPFVFSIGTGQVIK	28	0	3052.5	IPI00002535;IPI01013732	IPI00002535	yes	no	3,4	7.3567e-11	97.5	2	1	2	1
10010	113	IPGGATIVFEVEIIK	15	0	1584.91	IPI00002535	IPI00002535	yes	yes	2	3.7436e-17	158.11	1	1	1	1
10998	113	IVIPSEIGYGER	12	0	1331.71	IPI00002535	IPI00002535	yes	yes	2,3	4.4161e-09	142	2	10	2	10
11748	113	KGDVIHMHYTGK	12	1	1384.69	IPI00002535;IPI01013732	IPI00002535	yes	no	2,3,4	6.8953e-09	139.46	6	6	6	6
12085	113	KIQIGVK	7	1	784.517	IPI00002535;IPI01013732	IPI00002535	yes	no	2,3	0.015985	104.45	5	19	5	19
12118	113	KIVIPSEIGYGER	13	1	1459.8	IPI00002535	IPI00002535	yes	yes	2,3	0.00024009	115.33	7	12	7	12
15018	113	RVDHCPIK	8	1	1023.53	IPI00002535;IPI01013732	IPI00002535	yes	no	2,3	0.068339	68.735	1	2	1	2
2574	114	DTFIQNPQYIFTVPEDGHK	19	0	2248.08	IPI00002547;IPI01013861	IPI00002547	yes	no	3,4	1.0724e-79	211.9	5	5	5	5
5785	114	GHTYTMTDIR	10	0	1193.55	IPI00002547	IPI00002547	yes	yes	2,3	0.00018634	126.07	3	3	3	3
6192	114	GNYVIVPTMFQHGR	14	0	1617.81	IPI00002547;IPI01013861	IPI00002547	yes	no	3	1.0821e-05	125.82	2	3	2	3
8180	114	IFGEIYK	7	0	868.469	IPI00002547	IPI00002547	yes	yes	2	0.01108	122.78	4	2	4	2
8280	114	IFSEVPVQIR	10	0	1186.67	IPI00002547;IPI01013861	IPI00002547	yes	no	2,3	0.0069094	85.29	1	7	1	7
8623	114	IHHIYIQER	9	0	1207.65	IPI00002547;IPI01013861	IPI00002547	yes	no	2,3	9.2709e-08	141.39	3	2	3	2
10924	114	IVEVFSAEK	9	0	1020.55	IPI00002547;IPI01013861	IPI00002547	yes	no	2,3	7.5428e-05	124.23	2	9	2	9
11797	114	KGNYVIVPTMFQHGR	15	1	1745.9	IPI00002547;IPI01013861	IPI00002547	yes	no	4	1.2909e-05	111.79	4	6	4	6
12591	114	KYANETVNPYIVIK	14	1	1650.9	IPI00002547;IPI01013861	IPI00002547	yes	no	3	1.1858e-40	189.24	2	2	2	2
13750	114	NTVHAIFDTQAIFYR	15	0	1794.91	IPI00002547;IPI01013861	IPI00002547	yes	no	3	0.0081831	76.073	3	1	3	1
16977	114	TTDIPIIVQVWNSR	14	0	1640.89	IPI00002547;IPI01013861	IPI00002547	yes	no	3	2.1556e-62	208.72	2	11	2	11
17950	114	VIMSIQQK	8	0	945.532	IPI00002547;IPI01013861	IPI00002547	yes	no	2	0.00047274	127.02	2	4	2	4
19186	114	YAGIFHFR	8	0	1009.51	IPI00002547	IPI00002547	yes	yes	2,3	5.6258e-05	149.4	17	17	17	17
19846	114	YTEIVEEK	8	0	1009.5	IPI00002547	IPI00002547	yes	yes	2	0.009601	94.114		1		1
8615	115	IHFPVPSQWIK	11	0	1350.74	IPI00337314;IPI00893492;IPI00976407;IPI00002548;IPI00894398	IPI00337314	yes	no	3	0.0002448	114.5	3	2	3	2
15399	115	SGWSFMIR	8	0	982.469	IPI00337314;IPI00893492;IPI00976407;IPI00002548	IPI00337314	yes	no	2	0.087176	64.265	3	3	3	3
7990	116	IEHFMPIIVQR	11	0	1381.75	IPI00219794;IPI00002552	IPI00219794	yes	no	2,3	2.9691e-07	143.5	10	10	10	10
9082	117	IIHIIGK	7	0	792.522	IPI00002557;IPI00145121	IPI00002557	no	no	2,3	0.012277	118.03	14	15
13705	117	NSHSIYIAGIFR	12	0	1376.72	IPI00002557	IPI00002557	yes	yes	2,3	6.6023e-15	162.31	9	8	9	8
15616	117	SIPIAMAPVFEQK	13	0	1429.76	IPI00002557	IPI00002557	yes	yes	3	0.0064305	87.363		2		2
2541	118	DSPFGISFVR	10	0	1123.57	IPI01010850;IPI00002564;IPI01010437;IPI00911037;IPI00880055;IPI00879881	IPI01010850	yes	no	2	0.0023921	99.688	2	2	2	2
6775	118	HFFIYGEFPGDER	13	0	1612.73	IPI01010850;IPI00002564	IPI01010850	yes	no	3	2.7855e-46	199.09	2	1	2	1
386	119	AFIWEK	6	0	792.417	IPI00002580;IPI01011654	IPI00002580	yes	no	2	0.073921	86.344	1	1	1	1
2454	119	DPWDAVIIEER	11	0	1341.66	IPI00002580;IPI00981341	IPI00002580	yes	no	2	0.0015531	97.813	1	2	1	2
8838	119	IIDIIHK	7	0	850.528	IPI00002580;IPI01011654	IPI00002580	yes	no	3	0.039079	83.801	1	1	1	1
16403	119	TFDEFQEIHNK	11	0	1406.65	IPI00002580;IPI01011654	IPI00002580	yes	no	3	0.027037	70.942	1	1	1	1
18416	119	VSIPIFDFK	9	0	1064.59	IPI00002580;IPI01011654	IPI00002580	yes	no	2	0.0051643	97.635	2	2	2	2
18706	120	VWIPTAGFDHHVVR	14	0	1632.85	IPI00641770;IPI00002591;IPI00165547;IPI00976206;IPI00852981;IPI00980239	IPI00641770	yes	no	3	2.4195e-06	127.37	1	1	1	1
2305	121	DKDQSDGFGK	10	1	1095.48	IPI00002606;IPI00879729;IPI00044745	IPI00002606	yes	no	3	0.033127	80.231		3		3
3644	121	EIYHEEFAR	9	0	1192.55	IPI00002606;IPI00044745;IPI00893571;IPI00893274	IPI00002606	yes	no	2,3	3.9302e-08	146.81	2	2	2	2
3838	121	EPVHIISIFK	10	0	1181.68	IPI00002606;IPI00879729;IPI00044745	IPI00002606	yes	no	3	0.00075502	113.62	5	2	5	2
11563	121	KDYQTSPIIETQAEDHPPR	19	1	2224.08	IPI00002606;IPI00879729	IPI00002606	yes	no	4	1.9105e-05	95.236	1	1	1	1
11776	121	KGGQAPAPPTR	11	1	1078.59	IPI00002606;IPI00879729;IPI00044745	IPI00002606	yes	no	3	0.0022485	95.523		5		5
14143	121	QGHEPPTFTGWFIGWDSSK	19	0	2176	IPI00002606;IPI00879729	IPI00002606	yes	no	3	1.282e-45	185.02	3	2	3	2
14246	121	QIFVWK	6	0	819.464	IPI00002606;IPI00879729;IPI00044745	IPI00002606	yes	no	2	0.068723	88.591	3	4	3	4
7177	122	HSVHTIVFR	9	0	1094.6	IPI00871903;IPI00002624;IPI00382756;IPI00966646;IPI00921981;IPI00966966	IPI00871903	yes	no	2	0.10295	60.91	1	1	1	1
11151	122	IWDIVAGK	8	0	900.507	IPI00871903;IPI00002624;IPI00382756;IPI00967852	IPI00871903	yes	no	2	0.00040865	128.1	2	1	2	1
4868	123	FKQESTVATER	11	1	1294.65	IPI00789041;IPI00002649	IPI00789041	yes	no	3	0.098344	69.275		2		2
7237	123	HVIADQEVMETNR	13	0	1540.73	IPI00789041;IPI00002649	IPI00789041	yes	no	3	1.1055e-15	155.99		3		3
14794	123	RIEFAEQINK	10	1	1246.67	IPI00789041;IPI00002649	IPI00789041	yes	no	3	0.00013617	128.81	1	2	1	2
16780	123	TKPHIFYIPGR	11	1	1327.74	IPI00789041;IPI00002649	IPI00789041	yes	no	3,4	0.0027695	102.52	4	8	4	8
4057	124	ETNSGYSGMWHR	12	0	1423.59	IPI00002732;IPI00640273	IPI00002732	yes	no	3	0.0019732	94.191	1	1	1	1
9278	124	IINHYQAVPNIHK	13	0	1545.84	IPI00002732;IPI00640273;IPI00641761	IPI00002732	yes	no	4	0.017959	78.342	3	3	3	3
11022	124	IVNIYDSMPIR	11	0	1319.69	IPI00002732;IPI00640273	IPI00002732	yes	no	2	4.3053e-23	179.57	1	2	1	2
19488	124	YIEIFQR	7	0	967.513	IPI00002732;IPI00640273;IPI00641761	IPI00002732	yes	no	2	0.051466	78.496	2		2
22	125	AADMGNPVGQSGIGMAYIYGR	21	0	2126.99	IPI00002790	IPI00002790	yes	yes	3	1.3642e-73	197.45		6		6
340	125	AFDYFNIAANAGNSHAMAFIGK	22	0	2329.09	IPI00002790	IPI00002790	yes	yes	3	1.0535e-32	150.68	2	3	2	3
771	125	AIIHWNR	7	0	908.498	IPI00002790	IPI00002790	yes	yes	2	0.011355	121.68	4	5	4	5
5459	125	GDVQAQVGIGQIHIHGGR	18	0	1840.97	IPI00002790	IPI00002790	yes	yes	3,4	9.5318e-20	148.7	5	4	5	4
7580	125	IASEQQHSAQAMFNIGYMHEK	21	0	2419.1	IPI00002790;IPI00382747	IPI00002790	yes	no	4	0.051751	60.949	1		1
14382	125	QMQEAEMMYQTGMK	14	0	1704.7	IPI00002790;IPI00555723	IPI00002790	yes	no	3	0.0017281	91.62		4		4
15150	125	SCHTAVEIFK	10	0	1190.58	IPI00002790	IPI00002790	yes	yes	3	0.0032062	95.502	1	1	1	1
18455	125	VSYAIIFGDYIPQNIQAAR	19	0	2138.12	IPI00002790;IPI00555723	IPI00002790	yes	no	3	2.227e-66	203.27	6	2	6	2
5213	126	FWGWGR	6	0	807.382	IPI00002792;IPI00965448	IPI00002792	yes	no	2	0.022337	120.78	3	3	3	3
7632	126	IAVIVPFR	8	0	913.575	IPI00002792;IPI00965834;IPI00965732	IPI00002792	yes	no	2	0.0094475	94.407	2	4	2	4
15368	126	SGIISGGIPRK	11	1	1083.64	IPI00002792;IPI00965834	IPI00002792	yes	no	3	0.11045	59.908	2		2
9015	127	IIGAGKPWHK	10	1	1105.64	IPI00002824	IPI00002824	yes	yes	3	0.017791	87.476	4	5	4	5
15502	127	SIESTTITEK	10	0	1107.57	IPI00002824	IPI00002824	yes	yes	2	4.6461e-08	150.35	1	1	1	1
17115	127	TVYHAEEVQCDGR	13	0	1562.68	IPI00002824	IPI00002824	yes	yes	3	1.4474e-17	162.26	1	6	1	6
9925	128	INQYPESNAEYIAHIVPGAHVVK	23	0	2548.31	IPI00745161;IPI00925086;IPI00470699;IPI00002856	IPI00745161	yes	no	4	2.8613e-24	128.79		1		1
2142	129	DIIIDEWK	8	0	1030.53	IPI00002857;IPI00945296;IPI00221141	IPI00002857	yes	no	3	0.14766	57.177	2	2	2	2
6753	129	HENVIGIIDVFTPAR	15	0	1679.9	IPI00002857;IPI00945296;IPI00221141;IPI00221143;IPI00221142;IPI00984307;IPI00945931	IPI00002857	yes	no	3	4.9068e-17	156.8	2	3	2	3
10662	129	ITDDHVQFIIYQIIR	15	0	1873.01	IPI00002857;IPI00945296;IPI00221141;IPI00221143;IPI00221142;IPI00984307	IPI00002857	yes	no	3	2.554e-06	122.42	1		1
16600	129	TIFPGTDHIDQIK	13	0	1483.77	IPI00002857;IPI00945296;IPI00221143;IPI00221142	IPI00002857	yes	no	3	0.00029633	113.22	1	1	1	1
19528	129	YIHSADIIHR	10	0	1223.64	IPI00002857;IPI00945296;IPI00221141;IPI00221143;IPI00221142;IPI00984307	IPI00002857	yes	no	3	0.00011683	128.38	1	3	1	3
2955	130	EDAGSYTIHIVK	12	0	1331.67	IPI00002903;IPI00877612;IPI00332814	IPI00002903	yes	no	2,3	1.5453e-24	176.42	5	6	5	6
18373	130	VSAPSGTGHIPGINPI	16	0	1515.8	IPI00002903;IPI00877612;IPI00332814	IPI00002903	yes	no	2	3.9908e-05	99.011	1	3	1	3
7112	131	HQEPVYSVAFSPDGR	15	0	1687.8	IPI00002922;IPI00922336	IPI00002922	yes	no	3	0.0101	73.927	1	1	1	1
16997	131	TTIIWDAHTGEAK	13	0	1441.72	IPI00002922;IPI00922336;IPI00640917;IPI00218132;IPI00020873;IPI01012500	IPI00002922	yes	no	3	0.0033374	91.937	1	2	1	2
404	132	AFSDPFVEAEK	11	0	1238.58	IPI00002966;IPI01010895;IPI00031022	IPI00002966	yes	no	2,3	2.7826e-07	143.96	2	8	2	8
458	132	AGGIETIANEYSDR	14	0	1494.7	IPI00002966;IPI01010895;IPI00031022	IPI00002966	yes	no	2	1.3662e-23	170.66	1	1	1	1
2326	132	DKISGEYEK	9	1	1067.51	IPI00002966	IPI00002966	yes	yes	3	0.034472	87.308	1	3	1	3
2994	132	EDIYAVEIVGGATR	14	0	1491.76	IPI00002966;IPI01010895	IPI00002966	yes	no	3	6.1163e-07	128.28		3		3
3154	132	EFSITDVVPYPISIR	15	0	1734.92	IPI00002966;IPI01010895	IPI00002966	yes	no	2,3	9.9226e-24	162.93	9	5	9	5
3749	132	EMINIYIENEGK	12	0	1451.7	IPI00002966	IPI00002966	yes	yes	3	0.0066093	84.479	1	3	1	3
4985	132	FQESEERPK	9	1	1148.55	IPI00002966	IPI00002966	yes	yes	3	0.038152	85.676	1	2	1	2
5186	132	FVSEDDRNSFTIK	13	1	1556.75	IPI00002966	IPI00002966	yes	yes	3	0.063253	76.927	1	2	1	2
7931	132	IEDTENWIYEDGEDQPK	17	0	2079.89	IPI00002966	IPI00002966	yes	yes	3	3.4295e-74	212.39	1	6	1	6
8146	132	IFEEIGK	7	0	834.449	IPI00002966	IPI00002966	yes	yes	2	0.012946	108.09	2	7	2	7
11583	132	KEDIYAVEIVGGATR	15	1	1619.85	IPI00002966;IPI01010895	IPI00002966	yes	no	3	9.7715e-06	113.99	1	1	1	1
11672	132	KFDEVIVNHFCEEFGK	16	1	1996.94	IPI00002966;IPI01010895	IPI00002966	yes	no	4	0.0016548	85.837		1		1
13260	132	NAVEEYVYEMR	11	0	1401.62	IPI00002966	IPI00002966	yes	yes	3	1.8759e-31	186.74	1	3	1	3
13356	132	NFTTEQVTAMIISK	14	0	1581.81	IPI00002966;IPI01010895	IPI00002966	yes	no	2,3	1.0938e-31	174.17	3	4	3	4
13569	132	NKEDQYDHIDAADMTK	16	1	1892.82	IPI00002966	IPI00002966	yes	yes	4	0.0021386	89.46	2	2	2	2
14033	132	QDIPAIEEKPR	11	1	1294.69	IPI00002966;IPI01010895	IPI00002966	yes	no	3	9.9752e-05	130.01		4		4
15715	132	SKEIEAK	7	1	803.439	IPI00002966	IPI00002966	yes	yes	3	0.12134	82.671		4		4
15784	132	SNIAYDIVQIPTGITGIK	18	0	1902.05	IPI00002966;IPI01010895;IPI00031022	IPI00002966	yes	no	3	2.3247e-19	145.69	2	7	2	7
16040	132	STNEAMEWMNNK	12	0	1453.6	IPI00002966	IPI00002966	yes	yes	3	5.2411e-07	131.83	1	7	1	7
16970	132	TSTVDIPIENQIIWQIDR	18	0	2140.12	IPI00002966	IPI00002966	yes	yes	3	6.3367e-62	205.28	3	5	3	5
17764	132	VIATAFDTTIGGR	13	0	1320.7	IPI00002966;IPI01010895	IPI00002966	yes	no	2,3	6.2912e-21	164.9	2	10	2	10
18051	132	VITFYR	6	0	797.444	IPI00002966;IPI01010895	IPI00002966	yes	no	2	0.047245	97.306	2	5	2	5
18527	132	VTPQSDGSSSK	11	0	1091.51	IPI00002966	IPI00002966	yes	yes	2	0.0021518	93.258		4		4
18562	132	VTYMEEER	8	0	1055.46	IPI00002966;IPI01010895	IPI00002966	yes	no	2	0.01807	84.568		3		3
7031	133	HMIDYIWQR	9	0	1260.61	IPI00793764;IPI00644140;IPI00930637;IPI00003033	IPI00793764	yes	no	2,3	0.0016802	106.6	9	9	9	9
11864	133	KHMIDYIWQR	10	1	1388.7	IPI00793764;IPI00644140;IPI00930637;IPI00003033	IPI00793764	yes	no	3,4	0.025923	75.378	6		6
7165	134	HSPQEAPHVQYER	13	0	1576.74	IPI00003102;IPI00641374	IPI00003102	yes	no	3,4	0.0011353	101.93	1	2	1	2
1118	135	APQIIIAPFKEEDEWDSPHIVR	22	1	2589.32	IPI00003128;IPI00182373	IPI00003128	yes	no	4	0.04552	67.645	2	2	2	2
15066	135	SAADAEGYIAHPVNAYK	17	0	1775.85	IPI00003128;IPI00182373;IPI00894468;IPI00657713;IPI00852618;IPI00853118;IPI00657829;IPI00657802;IPI00852922;IPI00852962	IPI00003128	yes	no	3	3.6306e-13	124.42	1	2	1	2
19321	135	YFEQIIEEER	10	0	1354.64	IPI00003128;IPI00182373	IPI00003128	yes	no	2	1.2163e-05	138.22	2	2	2	2
19322	135	YFEQIIEEEREK	12	1	1611.78	IPI00003128;IPI00182373	IPI00003128	yes	no	3	0.0048447	96.604	2	2	2	2
7522	136	IAPAVVHIEIFR	12	0	1363.8	IPI00003176;IPI00902529	IPI00003176	yes	no	3	8.2767e-13	157.66	2	2	2	2
8685	136	IHRPPVIVIQR	11	1	1326.82	IPI00003176;IPI00902529	IPI00003176	yes	no	3	0.0014811	108.43		4		4
10109	136	IPVIIIGR	8	0	879.591	IPI00003176;IPI00902529	IPI00003176	yes	no	2	0.097845	62.717	4	6	4	6
5014	137	FRPDMEEEEAK	11	1	1379.6	IPI00003217	IPI00003217	yes	yes	3	8.2493e-07	143.96	1	7	1	7
7739	137	IDFIRPYTVPNK	12	1	1461.8	IPI00003217	IPI00003217	yes	yes	3	8.1918e-05	123.67	5	5	5	5
10793	137	ITPIEIEVIEETVQTMDTS	19	0	2147.06	IPI00003217	IPI00003217	yes	yes	3	0.031248	66.387	2		2
17268	138	VAPDEHPIIITEAPINPK	18	0	1953.06	IPI00003269	IPI00003269	yes	yes	4	0.18547	51.03	9	5	9	5
10221	139	IQGDANNIHGFEVDSR	16	0	1770.83	IPI00003309;IPI00927876;IPI00927637;IPI00924545;IPI00791019	IPI00003309	yes	no	3	4.5073e-19	151.74	1	4	1	4
18756	139	VYIIMK	6	0	765.446	IPI00003309;IPI00927876;IPI00927637;IPI00924545;IPI00791019	IPI00003309	yes	no	2	0.023121	118.11	2	5	2	5
5958	140	GIITIIK	7	0	756.511	IPI00003326;IPI00908403	IPI00003326	yes	no	2	0.01667	100.74		2		2
9895	140	INIWDVGGQK	10	0	1128.59	IPI00003326;IPI00908403	IPI00003326	yes	no	3	0.0042945	91.584		4		4
9166	141	IIIIGIDNAGK	11	0	1125.68	IPI00003327	IPI00003327	yes	yes	3	0.0047576	86.624		6		6
11227	142	IYAMHWGTDSR	11	0	1335.6	IPI00003348;IPI00925530;IPI00026268;IPI00790302;IPI00790896;IPI00797969;IPI00639998;IPI00640949;IPI00640462	IPI00003348	yes	no	2,3	2.9796e-16	169.09	11	14	11	14
17691	142	VHAIPIR	7	0	804.497	IPI00003348;IPI00925530;IPI00026268;IPI00790302;IPI00790896;IPI00797969;IPI00639998;IPI00640949;IPI00640462;IPI00029143;IPI01011922;IPI00386304;IPI01011186;IPI01012519	IPI00003348	yes	no	2	0.012902	109.88	1	1	1	1
964	143	AKFEEINMDIFR	12	1	1511.74	IPI00003362	IPI00003362	yes	yes	2,3	3.3668e-55	216.03	22	23	22	23
1699	143	DAGTIAGINVMR	12	0	1216.62	IPI00003362;IPI01014129	IPI00003362	yes	no	2,3	2.6072e-43	198.81	14	31	14	31
2389	143	DNHIIGTFDITGIPPAPR	18	0	1933.01	IPI00003362	IPI00003362	yes	yes	2,3,4	4.4738e-215	294.05	23	23	23	23
3112	143	EFFNGK	6	0	740.349	IPI00003362	IPI00003362	yes	yes	2	0.040389	99.919		5		5
3386	143	EIEEIVQPIISK	12	0	1396.78	IPI00003362	IPI00003362	yes	yes	2,3,4	2.7915e-33	191.26	27	47	27	47
4010	143	ETAEAYIGK	9	0	980.481	IPI00003362;IPI01014129	IPI00003362	yes	no	2,3	3.7516e-14	166.16	8	27	8	27
4294	143	FAEEDK	6	0	737.323	IPI00003362	IPI00003362	yes	yes	2	0.026083	109.88	3	11	3	11
4295	143	FAEEDKK	7	1	865.418	IPI00003362	IPI00003362	yes	yes	2	0.014088	120.65	5	7	5	7
4432	143	FEEINMDIFR	10	0	1312.61	IPI00003362	IPI00003362	yes	yes	2,3	1.6496e-34	197.27	36	37	36	37
7999	143	IEIESFYEGEDFSETITR	18	0	2163.98	IPI00003362	IPI00003362	yes	yes	2,3	4.6844e-243	244.56	29	32	29	32
8096	143	IEWIESHQDADIEDFK	16	0	1973.9	IPI00003362	IPI00003362	yes	yes	2,3,4	1.8041e-104	242.41	33	36	33	36
9270	143	IINEPTAAAIAYGIDKR	17	1	1814.99	IPI00003362;IPI01014129	IPI00003362	yes	no	2,3,4	3.3807e-74	213.83	22	27	22	27
10308	143	IQQIVK	6	0	727.459	IPI00003362;REV__IPI00719173;REV__IPI00844170;REV__IPI00941727	IPI00003362	yes	no	2	0.020794	126.04	5	9	5	9
10593	143	ISSEDKETMEK	11	1	1295.59	IPI00003362	IPI00003362	yes	yes	2,3	3.3945e-10	151.98	1	11	1	11
10762	143	ITITNDQNR	9	0	1073.55	IPI00003362	IPI00003362	yes	yes	2,3	9.8164e-08	140.83	8	16	8	16
10786	143	ITPEEIER	8	0	985.508	IPI00003362;IPI00552784;IPI00419728;IPI00030122	IPI00003362	yes	no	2	0.0010696	119.27	1	8	1	8
10800	143	ITPSYVAFTPEGER	14	0	1565.77	IPI00003362;IPI01014129	IPI00003362	yes	no	2,3	7.0946e-76	220.66	20	33	20	33
11277	143	IYGSAGPPPTGEEDTAEKDEI	21	1	2174.99	IPI00003362	IPI00003362	yes	yes	2,3	1.7781e-137	251.68	10	21	10	21
12134	143	KKEIEEIVQPIISK	14	2	1652.97	IPI00003362	IPI00003362	yes	yes	3	4.8031e-22	168.61	4	5	4	5
12364	143	KSDIDEIVIVGGSTR	15	1	1587.85	IPI00003362	IPI00003362	yes	yes	2,3,4	1.6232e-98	242.91	22	43	22	43
12386	143	KSQIFSTASDNQPTVTIK	18	1	1964.02	IPI00003362	IPI00003362	yes	yes	3	5.8633e-91	229.23	2	8	2	8
12426	143	KTKPYIQVDIGGGQTK	16	2	1731.95	IPI00003362;IPI01014129	IPI00003362	yes	no	3	3.2499e-25	171.26	4	4	4	4
12545	143	KVTHAVVTVPAYFNDAQR	18	1	2015.06	IPI00003362;IPI01014129	IPI00003362	yes	no	3,4	9.2215e-31	164.2	8	9	8	9
12980	143	MKETAEAYIGK	11	1	1239.62	IPI00003362;IPI01014129	IPI00003362	yes	no	2,3	1.2305e-15	167.2	16	29	16	29
13175	143	MVNDAEK	7	0	805.364	IPI00003362	IPI00003362	yes	yes	2,3	0.0091657	129.4	17	22	17	22
13304	143	NEIESYAYSIK	11	0	1315.63	IPI00003362	IPI00003362	yes	yes	2,3	1.5273e-50	208.72	15	26	15	26
13683	143	NQIGDKEK	8	1	930.477	IPI00003362	IPI00003362	yes	yes	2,3	0.00018365	147.19	1	13	1	13
13684	143	NQITSNPENTVFDAK	15	0	1676.8	IPI00003362;IPI01014129	IPI00003362	yes	no	2,3	1.3385e-98	242.91	9	19	9	19
13753	143	NTVVPTK	7	0	757.433	IPI00003362	IPI00003362	yes	yes	2	0.030652	88.942	3	10	3	10
13754	143	NTVVPTKK	8	1	885.528	IPI00003362	IPI00003362	yes	yes	2,3	0.0012149	120.15	2	8	2	8
15174	143	SDIDEIVIVGGSTR	14	0	1459.75	IPI00003362	IPI00003362	yes	yes	2,3	3.2425e-32	182.1	3	15	3	15
15887	143	SQIFSTASDNQPTVTIK	17	0	1835.93	IPI00003362	IPI00003362	yes	yes	2,3,4	0	339.58	14	30	14	30
16038	143	STMKPVQK	8	1	917.5	IPI00003362	IPI00003362	yes	yes	2,3	2.4926e-05	160.88	7	17	7	17
16400	143	TFAPEEISAMVITK	14	0	1535.79	IPI00003362;IPI01014129	IPI00003362	yes	no	2,3	4.0667e-91	232.6	20	56	20	56
16785	143	TKPYIQVDIGGGQTK	15	1	1603.86	IPI00003362;IPI01014129	IPI00003362	yes	no	2,3,4	1.2364e-96	234.85	24	36	24	36
17126	143	TWNDPSVQQDIK	12	0	1429.68	IPI00003362;IPI01014129	IPI00003362	yes	no	2,3	1.3039e-24	177.83	19	24	19	24
17801	143	VIEDSDIK	8	0	917.471	IPI00003362	IPI00003362	yes	yes	2,3	0.003305	107.9	15	31	15	31
17802	143	VIEDSDIKK	9	1	1045.57	IPI00003362	IPI00003362	yes	yes	2,3	5.6629e-15	172.94	2	9	2	9
18151	143	VMEHFIK	7	0	902.468	IPI00003362;IPI01014129	IPI00003362	yes	no	2,3	0.0052177	140.53	28	30	28	30
18464	143	VTAEDK	6	0	661.328	IPI00003362	IPI00003362	yes	yes	2	0.064803	90.285	6	8	6	8
18465	143	VTAEDKGTGNK	11	1	1118.56	IPI00003362	IPI00003362	yes	yes	2,3	1.1733e-50	217.14	1	10	1	10
18496	143	VTHAVVTVPAYFNDAQR	17	0	1886.96	IPI00003362;IPI01014129	IPI00003362	yes	no	2,3,4	4.331e-74	210.37	17	30	17	30
18736	143	VYEGERPITK	10	1	1190.63	IPI00003362	IPI00003362	yes	yes	2,3	0.00012409	135.43	13	14	13	14
7802	144	IDKEIDDYREESEEYMAAADEYNR	24	2	2953.26	IPI00003373;IPI00976572;IPI00479078;IPI00975938;IPI00978567;IPI00977990;IPI00965141;IPI01015715	IPI00003373	yes	no	4	0.0027281	81.316	1	1	1	1
408	145	AFSYYGPIR	9	0	1072.53	IPI00003377;IPI00916448;IPI00917346;IPI00744364;IPI00939530	IPI00003377	yes	no	2,3	6.5784e-08	144.12	6	17	6	17
13658	145	NPPGFAFVEFEDPRDAEDAVR	21	1	2377.1	IPI00003377;IPI00916448;IPI00917346;IPI00744364;IPI00939530	IPI00003377	yes	no	3,4	6.2256e-07	103.87	7	7	7	7
17113	145	TVWIAR	6	0	744.428	IPI00003377;IPI00916448;IPI00917346;IPI00744364;IPI00939530	IPI00003377	yes	no	2	0.061798	91.584	1	2	1	2
17477	145	VEISTGMPR	9	0	988.501	IPI00003377;IPI00916448;IPI00917346;IPI00744364;IPI00939530	IPI00003377	yes	no	2	0.0062028	95.358	2	3	2	3
18777	145	VYVGNIGTGAGK	12	0	1134.6	IPI00003377;IPI00916448;IPI00917346;IPI00744364;IPI00939530	IPI00003377	yes	no	2	1.5185e-05	125.54	2	8	2	8
10200	146	IQEIYQEITR	10	0	1291.68	IPI00872805;IPI00290006;IPI00385903;IPI00410289;IPI00940396;IPI00748018;IPI00045033;IPI00410201;IPI00943042;IPI00874038;IPI00922589;IPI01009884;IPI00410294;IPI00409772;IPI00922313;IPI00382673;IPI00290003;IPI00410005;IPI00290007;IPI00045017;IPI00003402;IPI01009365;IPI00410004;IPI00410295;IPI00410009;IPI01016068;IPI00382671;IPI00156091;IPI00642143;IPI00410204	IPI00872805	yes	no	2	0.0024709	99.283	1	1	1	1
3236	147	EGKPTIVEEDDPEIFK	16	1	1844.9	IPI00003438	IPI00003438	yes	yes	3	8.3711e-11	136.99		1		1
14458	147	QREEEIEAQEK	11	1	1387.66	IPI00003438	IPI00003438	yes	yes	3	4.5787e-23	183.33	1	3	1	3
16065	148	SVAQFQAER	9	0	1034.51	IPI00003446;IPI00470548;IPI00944502	IPI00003446	yes	no	2	0.0021713	104.2		5		5
639	149	AIDIIDK	7	0	786.449	IPI00003479;IPI01015278;IPI00874012	IPI00003479	yes	no	2	0.025793	91.906	1	1	1	1
9632	149	IKEIIFEETAR	11	1	1347.74	IPI00003479;IPI01015278;IPI00874012	IPI00003479	yes	no	3	0.010299	89.827	1		1
12957	149	MITFNPHKR	9	1	1142.6	IPI00003479;IPI01015278;IPI00874012	IPI00003479	yes	no	4	0.014575	86.794	2	2	2	2
17202	149	VADPDHDHTGFITEYVATR	19	0	2143	IPI00003479;IPI01015278;IPI00874012	IPI00003479	yes	no	3,4	2.744e-09	112.24	2	1	2	1
3917	150	EQWDTIEEIIR	11	0	1430.7	IPI00003482;IPI00980553;IPI00789705	IPI00003482	yes	no	2,3	1.5451e-17	173.64	4	4	4	4
4520	150	FFSPIQK	7	0	865.47	IPI00003482;IPI00980553;IPI00976338;IPI00978507;IPI00980484	IPI00003482	yes	no	2	0.048315	79.597		4		4
6142	150	GMTTIISSIGAQCVIASR	18	0	1863.95	IPI00003482;IPI00980553;IPI00976338;IPI00978507;IPI00980484;IPI00979062	IPI00003482	yes	no	3	3.8168e-24	153.94		4		4
2063	151	DIEIQAIHAR	10	0	1164.63	IPI00003515;IPI01009865	IPI00003515	yes	no	3	0.0020112	101.65	1	1	1	1
4043	151	ETIIAEIEEIDR	12	0	1429.73	IPI00003515;IPI01009865	IPI00003515	yes	no	2,3	3.514e-13	160.36	4		4
5055	151	FSMMIR	6	0	783.377	IPI00003515;IPI01009865	IPI00003515	yes	no	2	0.047245	97.306	3	3	3	3
9759	151	IMGSIIGVR	9	0	944.548	IPI00003515;IPI01009865	IPI00003515	yes	no	2	0.03806	71.692	1	1	1	1
10184	151	IQEEIDKYSQAIR	13	1	1591.82	IPI00003515;IPI01009865	IPI00003515	yes	no	3	0.00028509	120.77	2	1	2	1
10589	151	ISSAENDRDIIR	12	1	1387.71	IPI00003515;IPI01009865	IPI00003515	yes	no	3	0.033612	79.659	1	2	1	2
13426	151	NIFIGHFHTPK	11	0	1309.69	IPI00003515;IPI01009865	IPI00003515	yes	no	3,4	0.0039333	88.681	11	12	11	12
14678	151	REEMEQIFHDDQGGVTR	17	1	2045.92	IPI00003515;IPI01009865	IPI00003515	yes	no	4	9.9118e-09	112.5	1	1	1	1
2535	152	DSIVQGFQWGTR	12	0	1392.68	IPI00003519;IPI01012385;IPI00917777;IPI00903143	IPI00003519	yes	no	2,3	6.4406e-25	181.68		8		8
4468	152	FFDDPMIIEIAK	12	0	1437.72	IPI00003519;IPI01012385;IPI00917777	IPI00003519	yes	no	2,3	9.6114e-18	166.14	8	8	8	8
6151	152	GNEEAQIFRPIK	12	1	1400.74	IPI00003519;IPI01012385;IPI00917777;IPI00903143	IPI00003519	yes	no	3	4.1495e-05	125.72	1	1	1	1
7628	152	IAVEPVNPSEIPK	13	0	1391.77	IPI00003519;IPI01012385;IPI00917777;IPI00903143	IPI00003519	yes	no	2	1.0794e-15	156.14	2	2	2	2
8374	152	IGEFFQTK	8	0	968.497	IPI00003519;IPI01012385;IPI00917777;IPI00903143	IPI00003519	yes	no	2	0.0065061	100.02		4		4
8775	152	IIAQVVGDVDTSIPR	15	0	1581.87	IPI00003519;IPI01012385;IPI00917777;IPI00903143	IPI00003519	yes	no	3	2.3007e-108	141.37		1		1
8801	152	IIDAVVAQEPIHR	13	0	1459.81	IPI00003519;IPI01012385;IPI00917777	IPI00003519	yes	no	3	1.0952e-06	130.56	3	6	3	6
9133	152	IIIEIK	6	0	727.484	IPI00003519;IPI01012385;IPI00917777;REV__IPI00953555;REV__IPI00923621;REV__IPI00887249;REV__IPI00221012;REV__IPI00874074;REV__IPI00003964;REV__IPI00744575;IPI00470917;IPI00292836;IPI00985083;REV__IPI00304621;REV__IPI00946017;IPI01011830;IPI01014593;REV__IPI00300186;REV__IPI00807371;REV__IPI00289061;IPI00827847;IPI00552280;IPI00873901	IPI00003519	no	no	2	0.045345	98.03		2
9891	152	INIRPIIR	8	1	993.645	IPI00003519;IPI01012385;IPI00917777;IPI00903143	IPI00003519	yes	no	3	0.058811	82.671	8	4	8	4
10774	152	ITMIAEPIEK	10	0	1143.62	IPI00003519;IPI01012385;IPI00917777;IPI00903143	IPI00003519	yes	no	2	0.00098809	110.53	2	2	2	2
11175	152	IWGDIYFNPK	10	0	1251.63	IPI00003519;IPI01012385;IPI00917777;IPI00903143	IPI00003519	yes	no	2,3	5.0754e-05	134.59	2	3	2	3
11191	152	IWISVAR	7	0	843.497	IPI00003519;IPI01012385;IPI00917777;IPI00903143	IPI00003519	yes	no	2	0.014563	102.98	3	2	3	2
11787	152	KGISEDVSISK	11	1	1161.62	IPI00003519;IPI01012385;IPI00917777	IPI00003519	yes	no	3	0.022189	75.509	1	1	1	1
13228	152	MYSTDDGVQFHAFGR	15	0	1729.75	IPI00003519;IPI01012385;IPI00917777;IPI00903143	IPI00003519	yes	no	3	3.2954e-19	162.31	2	1	2	1
13809	152	NVTICGHIHHGK	12	0	1371.68	IPI00003519;IPI01012385;IPI00917777	IPI00003519	yes	no	4	0.00060784	103.91	2	1	2	1
14853	152	RIWGDIYFNPK	11	1	1407.73	IPI00003519;IPI01012385;IPI00917777;IPI00903143	IPI00003519	yes	no	3	0.0014256	100.69	1	1	1	1
15326	152	SFVEFIIEPIYK	12	0	1483.8	IPI00003519;IPI01012385;IPI00917777;IPI00903143	IPI00003519	yes	no	3	0.00046274	105.86		1		1
15679	152	SIVIRPIEPQPAPHIAR	17	1	1893.09	IPI00003519;IPI01012385;IPI00917777	IPI00003519	yes	no	3	0.093258	67.326	1	1	1	1
16562	152	TIDEIGIHITK	11	0	1238.69	IPI00003519;IPI01012385;IPI00917777;IPI00903143	IPI00003519	yes	no	3	0.00044786	109.66	1	1	1	1
18244	152	VPAGNWVIIEGVDQPIVK	18	0	1933.07	IPI00003519;IPI01012385;IPI00917777;IPI00903143	IPI00003519	yes	no	3	3.0538e-51	196.8		6		6
18680	152	VVYSAFIMATPR	12	0	1353.71	IPI00003519;IPI01012385;IPI00917777	IPI00003519	yes	no	2,3	7.0331e-18	168.22	8	10	8	10
19262	152	YDWDIIAAR	9	0	1121.55	IPI00003519;IPI01012385;IPI00917777;IPI00903143	IPI00003519	yes	no	2	0.013677	84.615	2	2	2	2
2855	153	EAIAEAAIESPRPAIVR	17	1	1791.98	IPI00003527;IPI00794755	IPI00003527	yes	no	3	0.02506	76.01		3		3
9534	153	IIVVDPETDEQIQK	14	0	1625.85	IPI00003527;IPI00794755;IPI00902652	IPI00003527	yes	no	3	0.017655	74.392	2	2	2	2
9535	153	IIVVDRETDEFFK	13	1	1609.84	IPI00003527	IPI00003527	yes	yes	3	6.5407e-05	126.19	3	2	3	2
10921	153	IVEPGSPAEK	10	0	1025.54	IPI00003527;IPI00794755	IPI00003527	yes	no	2	0.00075502	113.62	1	1	1	1
14625	153	RAPQMDWSK	9	1	1117.53	IPI00003527;IPI00794755	IPI00003527	yes	no	3	0.036132	75.378	2		2
922	154	AIVQQWIEYR	10	0	1304.69	IPI00003588;IPI00646720;IPI00964364;IPI00913838;IPI00963998;IPI00964664	IPI00003588	yes	no	2	9.9249e-19	123.35	2		2
18877	154	WFCHIQHYPGIR	12	0	1612.77	IPI00003588	IPI00003588	yes	yes	3,4	1.6574e-07	136.96	6	3	6	3
6678	155	GYVHYFFGCR	10	0	1304.58	IPI00003590;IPI00465016	IPI00003590	yes	no	2,3	5.8523e-05	133.86	6	5	6	5
7947	155	IEEIDGFFAR	10	0	1195.59	IPI00003590;IPI00465016;IPI00015916	IPI00003590	yes	no	2	0.0027109	98.048	1	2	1	2
10124	155	IPYSFFK	7	0	900.475	IPI00003590;IPI00465016;IPI00015916	IPI00003590	yes	no	2	0.063377	74.335	2	2	2	2
11691	155	KFGVTDFPSCYIIFR	15	1	1848.92	IPI00003590;IPI00465016;IPI00015916	IPI00003590	yes	no	3	0.013574	72.705	3	3	3	3
15106	155	SAIYSPSDPITIIQADTVR	19	0	2046.06	IPI00003590;IPI00465016;IPI00015916;IPI00872013	IPI00003590	yes	no	3	8.1549e-95	221.59		4		4
15332	155	SFYTAYIQR	9	0	1147.57	IPI00003590;IPI00465016;IPI00015916	IPI00003590	yes	no	2,3	0.00017951	118.5	2	6	2	6
2728	156	DYAFVHMER	9	0	1166.52	IPI00003704;IPI00027838;IPI00974578;IPI00556034;IPI00908491;IPI00965408;IPI00977800;IPI00979194;IPI00940890	IPI00003704	yes	no	3	0.0044786	99.139	2	2	2	2
12846	156	MHVQISTSR	9	0	1057.53	IPI00003704;IPI00027838;IPI00974578;IPI00719549	IPI00719549	no	no	3	0.039111	71.223	2	1
13840	156	NYGFVHIEDK	10	0	1220.58	IPI00003704;IPI00027838;IPI00974578;IPI00556034;IPI00908491;IPI00965408;IPI00977800;IPI00979194;IPI00940890	IPI00003704	yes	no	3	0.00048685	118.18	2	2	2	2
9755	157	IMGNINIPKPQQIDFAVPANMR	22	1	2466.29	IPI00003766	IPI00003766	yes	yes	3	7.3122e-10	105.9	2	2	2	2
10465	157	ISGAQADIHIEDGDSIR	17	0	1795.87	IPI00003766	IPI00003766	yes	yes	3	1.6643e-08	108.71		5		5
16753	157	TIYHSVHEK	9	0	1112.56	IPI00003766	IPI00003766	yes	yes	3	0.01007	89.355	2	2	2	2
3373	158	EIEAIFGRPVVDGEEGEPHSISPR	24	1	2619.29	IPI00003783;IPI00795187	IPI00003783	yes	no	4	0.013304	67.227	2	1	2	1
17625	158	VGEIKDDDFER	11	1	1321.62	IPI00003783;IPI00419792	IPI00003783	yes	no	3	0.070501	72.643	1	1	1	1
2976	159	EDGKVFDEK	9	1	1065.5	IPI00644697;IPI00003799	IPI00644697	yes	no	3	0.01656	96.711		3		3
13675	159	NQEQIITIASIIR	13	0	1497.85	IPI00644697;IPI00003799	IPI00644697	yes	no	2	5.1866e-37	195.77	4	3	4	3
486	160	AGISHMIIQR	10	0	1124.61	IPI00003802	IPI00003802	yes	yes	3	0.00011707	128.36	1		1
567	160	AHIPPIGIK	9	0	944.581	IPI00003802	IPI00003802	yes	yes	3	0.024088	77.923	1	4	1	4
6764	160	HFAIHK	6	0	751.413	IPI00003802	IPI00003802	yes	yes	2	0.070648	87.758		1		1
8200	160	IFHSIMVIEK	10	0	1215.67	IPI00003802	IPI00003802	yes	yes	3	0.00048685	118.18	6	3	6	3
8738	160	IIAENNEIISNIR	13	0	1497.82	IPI00003802	IPI00003802	yes	yes	2	0.038015	91.858		1		1
11847	160	KHFAIHK	7	1	879.508	IPI00003802	IPI00003802	yes	yes	3	0.015779	105.39	3	4	3	4
13858	160	NYQQIFDYMNSQSK	14	0	1764.78	IPI00003802	IPI00003802	yes	yes	3	4.8958e-05	118.76		4		4
15133	160	SAVNTEEEKK	10	1	1133.56	IPI00003802	IPI00003802	yes	yes	3	0.0020596	103.26		6		6
15398	160	SGWAIDPFGHSPTMAYIINR	20	0	2232.08	IPI00003802	IPI00003802	yes	yes	3,4	1.8457e-36	151.59	11	7	11	7
16581	160	TIEFFWR	7	0	997.502	IPI00003802	IPI00003802	yes	yes	2	0.012494	117.17	8	8	8	8
17891	160	VIIAPIGDDFR	11	0	1214.67	IPI00003802	IPI00003802	yes	yes	2	0.0020136	94.309	2	5	2	5
19626	160	YIVVYNPIEQDR	12	0	1507.77	IPI00003802	IPI00003802	yes	yes	2,3	0.00033654	109.24	2	6	2	6
3238	161	EGMIQHWEIGQAIR	14	0	1666.83	IPI00003807;IPI00925377;IPI00983335;IPI00975825;IPI00977516;IPI00976906;IPI00974018;IPI00909518;IPI01015683;IPI00985163;IPI00984373	IPI00003807	yes	no	2,3	6.5971e-17	161.04	4	3	4	3
4671	161	FIFGIYQQAEK	11	0	1342.69	IPI00003807;IPI00925377;IPI00983335;IPI01014507;IPI00975825;IPI00977516;IPI01010611	IPI00003807	yes	no	3	0.00055332	107.15	1	2	1	2
5192	161	FVTIIYR	7	0	910.528	IPI00003807;IPI00925377;IPI00983335;IPI01014507;IPI00976906;IPI00974018;IPI00909518;IPI01015683;IPI00985163;IPI00984373	IPI00003807	yes	no	2	0.012798	114.19	5	7	5	7
252	162	AEEYEFITPVEEAPK	15	0	1750.83	IPI00794402;IPI00796541;IPI00003815;IPI00793767;IPI00791180	IPI00794402	yes	no	2,3,4	4.7523e-82	224.42	2	15	2	15
3625	162	EIVSGMK	7	0	762.395	IPI00794402;IPI00796541;IPI00003815;IPI00793767;IPI00797560;IPI00797924	IPI00794402	yes	no	2	0.013181	104.45	2	6	2	6
7809	162	IDKTDYMVGSYGPR	14	1	1600.76	IPI00794402;IPI00796541;IPI00003815;IPI00791180	IPI00794402	yes	no	2,3	1.8345e-10	145.6	6	8	6	8
15627	162	SIQEIQEIDKDDESIR	16	1	1916.93	IPI00794402;IPI00796541;IPI00003815;IPI00793767;IPI00797560;IPI00797924	IPI00794402	yes	no	3,4	4.5546e-26	171.21	4	12	4	12
15628	162	SIQEIQEIDKDDESIRK	17	2	2045.03	IPI00794402;IPI00796541;IPI00003815;IPI00793767;IPI00797560;IPI00797924	IPI00794402	yes	no	3	1.3421e-11	121.99	1	1	1	1
16329	162	TDYMVGSYGPR	11	0	1244.55	IPI00794402;IPI00796541;IPI00003815;IPI00791180	IPI00794402	yes	no	2	0.00071107	104.22		4		4
1078	163	APEPHVEEDDDDEIDSK	17	0	1938.8	IPI00003817;IPI01011820;IPI01013112;IPI01012413	IPI00003817	yes	no	3	3.2703e-75	219.35	2	8	2	8
3558	163	EIQEMDKDDESIIK	14	1	1691.79	IPI00003817;IPI01011820;IPI01013112;IPI01012413;IPI01015187	IPI00003817	yes	no	3	2.3975e-50	201.04	2	6	2	6
9955	163	INYKPPPQK	9	1	1083.61	IPI00003817;IPI01011820;IPI01013112;IPI01012413;IPI01015187	IPI00003817	yes	no	3	0.045815	82.279	1	3	1	3
7357	164	IAAYGHEVGK	10	0	1043.54	IPI00003818;IPI00651624;IPI00916732	IPI00003818	yes	no	3	0.01478	78.516	2	3	2	3
7922	164	IEDIIEVIEK	10	0	1199.66	IPI00003818;IPI00651624	IPI00003818	yes	no	3	0.00091854	111.46	3		3
10254	164	IQIIPGVCGFR	11	0	1258.69	IPI00003818	IPI00003818	yes	yes	2	0.055151	65.719	1	7	1	7
14960	164	RPWITGDESIVGIMK	15	1	1700.89	IPI00003818;IPI00651624;IPI00916732	IPI00003818	yes	no	3,4	4.719e-43	191.06	3	2	3	2
17153	164	TYIEEEIDK	9	0	1138.54	IPI00003818;IPI00651624;IPI00916732	IPI00003818	yes	no	2	0.0049828	98.033	1	1	1	1
17154	164	TYIEEEIDKWAK	12	1	1523.75	IPI00003818;IPI00651624;IPI00916732	IPI00003818	yes	no	3	1.5337e-08	140.49	3	3	3	3
17244	164	VAIHIDEEDKIR	12	1	1436.76	IPI00003818;IPI00651624;IPI00916732;IPI00915775	IPI00003818	yes	no	3,4	4.0975e-05	125.75	5	5	5	5
19570	164	YINAGAGGIAGAFIHEK	17	0	1687.87	IPI00003818;IPI00651624	IPI00003818	yes	no	3	7.9079e-15	130.61	1	1	1	1
11887	165	KHYYDGTIFHR	11	1	1435.7	IPI00217324;IPI00003824;IPI00910138;IPI00878225	IPI00217324	yes	no	3	0.1389	57.532	1		1
15874	165	SQFFITFR	8	0	1044.54	IPI00217324;IPI00003824;IPI00910138;IPI00878225	IPI00217324	yes	no	2	0.0020296	113.18		3		3
2798	166	EAAVEDIHHYR	11	0	1338.63	IPI00937891;IPI00003827;IPI00852651;IPI00514470;IPI00643648	IPI00937891	yes	no	3	0.0041835	88.056	1		1
6545	166	GVTYSIESFIGPR	13	0	1424.73	IPI00937891;IPI00003827;IPI00852651;IPI00514470;IPI00643648	IPI00937891	yes	no	3	3.2786e-08	138.99	2	2	2	2
9923	166	INQVEIPHWIR	11	0	1403.77	IPI00937891;IPI00003827;IPI00852651;IPI00514470;IPI00643648	IPI00937891	yes	no	3	0.0021518	93.258	2	2	2	2
13530	166	NISEFFR	7	0	911.45	IPI00937891;IPI00003827;IPI00852651;IPI00514470;IPI00643648	IPI00937891	yes	no	2	0.048682	79.469	1	2	1	2
18628	166	VVITGDWK	8	0	916.502	IPI00937891;IPI00003827;IPI00852651	IPI00937891	yes	no	2	0.047784	69.998		1		1
5880	167	GIFTGITPR	9	0	960.539	IPI00003833;IPI00983602;IPI00980410	IPI00003833	yes	no	2	0.016523	81.296		9		9
6174	167	GNSIFFR	7	0	839.429	IPI00003833;IPI01015136	IPI00003833	yes	no	2	0.084636	77.058	1	4	1	4
15069	167	SAATIITHPFHVITIR	16	0	1776	IPI00003833;IPI00983602;IPI00980410	IPI00003833	yes	no	2,3,4	6.8197e-71	213.67	13	10	13	10
18006	167	VIQHYQESDKGEEIGPGNVQK	21	1	2354.15	IPI00003833;IPI00983602	IPI00003833	yes	no	4	6.5704e-10	114.01	2	2	2	2
6082	168	GKDYYCIIGIEK	12	1	1457.72	IPI00003848;IPI00645574	IPI00003848	yes	no	3	0.00022245	116.55	1	1	1	1
9065	168	IIGYGIPFPK	10	0	1103.64	IPI00003848	IPI00003848	yes	yes	3	0.0039391	92.439	3	4	3	4
1213	169	ARDDIITDIINEAK	14	1	1585.83	IPI00003856;IPI00719806;IPI00853433	IPI00003856	yes	no	3	3.8338e-07	136.93	1	2	1	2
7034	169	HMMAFIEQEANEK	13	0	1576.7	IPI00003856;IPI00719366;IPI00059139	IPI00003856	yes	no	3	4.315e-36	186.87	2	2	2	2
7770	169	IDIIAQQMMPEVR	13	0	1542.79	IPI00003856;IPI00719806;IPI00719366	IPI00003856	yes	no	2,3	1.6225e-21	171.57	3	7	3	7
9747	169	IMEYYEK	7	0	974.442	IPI00003856;IPI00719806;IPI00719366;IPI00059139;IPI00853433	IPI00003856	yes	no	2	0.025793	91.906		3		3
1372	170	ATVEDEK	7	0	790.371	IPI00003865;IPI00981943;IPI00980749;IPI00980343;IPI00983398;IPI00984555	IPI00003865	yes	no	2	0.02277	94.262	2	13	2	13
1641	170	CNEIINWIDK	10	0	1303.62	IPI00003865;IPI00981943;IPI00980749;IPI00980343;IPI00983398;IPI00984555	IPI00003865	yes	no	2,3	0.00078504	113.22	8	8	8	8
1698	170	DAGTIAGINVIR	12	0	1198.67	IPI00003865;IPI00981943;IPI00037070;IPI00984226;IPI00910870;IPI01008803;IPI00981429;IPI00981268;IPI00980651;IPI00981926;IPI00844513	IPI00003865	yes	no	2,3	3.6059e-33	189.58	19	37	19	37
3039	170	EEFEHQQK	8	0	1073.48	IPI00003865;IPI00981943;IPI00980749;IPI00980343;IPI00983398;IPI00984555	IPI00003865	yes	no	3	0.0012325	117.16	1	3	1	3
3327	170	EIAEAYIGK	9	0	992.518	IPI00003865;IPI00981943;IPI00037070;IPI00984226;IPI00910870;IPI01008803;IPI00981429;IPI00981268;IPI00980651;IPI00981926;IPI00844513	IPI00003865	yes	no	2,3	5.7045e-17	174.02	10	22	10	22
4368	170	FDDAVVQSDMK	11	0	1253.56	IPI00003865;IPI00981943;IPI00980749;IPI00037070;IPI00984226;IPI00910870;IPI01008803;IPI00981429;IPI00981268;IPI00980651;IPI00983926;IPI00844513	IPI00003865	yes	no	2,3	1.9874e-07	145.91	7	14	7	14
6418	170	GTIDPVEK	8	0	857.449	IPI00003865;IPI00981943;IPI00980749;IPI00037070;IPI00980343;IPI00984226	IPI00003865	yes	no	2	0.0020862	112.94	11	20	11	20
7284	170	HWPFMVVNDAGR	12	0	1427.68	IPI00003865;IPI00981943;IPI00980749;IPI00037070;IPI00984226;IPI00910870;IPI01008803;IPI00981429;IPI00981268;IPI00980651;IPI00983926	IPI00003865	yes	no	2,3	1.0864e-24	179.1	21	24	21	24
7285	170	HWPFMVVNDAGRPK	14	1	1652.82	IPI00003865;IPI00981943;IPI00980749;IPI00037070;IPI00984226;IPI00910870;IPI01008803;IPI00981429;IPI00981268;IPI00980651;IPI00983926	IPI00003865	yes	no	2,3,4	1.9e-126	256.96	30	31	30	31
7808	170	IDKSQIHDIVIVGGSTR	17	1	1837.01	IPI00003865;IPI00981943;IPI00980749;IPI00037070;IPI00980343;IPI00984226	IPI00003865	yes	no	4	0.03282	73.887	2	1	2	1
10536	170	ISKEDIER	8	1	988.519	IPI00003865;IPI00981943;IPI00980749;IPI00980343;IPI00983398;IPI00984555	IPI00003865	yes	no	2	0.015407	102.51	1	2	1	2
11343	170	IYQSAGGMPGGMPGGFPGGGAPPSGGASSGPTIEEVD	37	0	3345.49	IPI00003865;IPI00981943;IPI00980749;IPI00980343	IPI00003865	yes	no	3,4	1.2496e-23	95.108	2	10	2	10
11524	170	KDISENKR	8	2	988.53	IPI00003865;IPI00981943;IPI00980749;IPI00037070;IPI00980343;IPI00984226	IPI00003865	yes	no	3	0.085443	105.14	1	2	1	2
12978	170	MKEIAEAYIGK	11	1	1251.65	IPI00003865;IPI00981943;IPI00037070;IPI00984226;IPI00910870;IPI01008803;IPI00981429;IPI00981268;IPI00980651;IPI00981926;IPI00844513	IPI00003865	yes	no	2,3	5.8934e-60	224.66	18	17	18	17
13176	170	MVNHFIAEFK	10	0	1234.62	IPI00003865;IPI00981943;IPI00037070;IPI00980343;IPI00984226	IPI00003865	yes	no	2,3	7.3372e-16	167.67	39	36	39	36
13688	170	NQTAEKEEFEHQQK	14	1	1744.8	IPI00003865;IPI00981943;IPI00980749;IPI00980343;IPI00983398;IPI00984555	IPI00003865	yes	no	3,4	1.5938e-75	223.31	3	5	3	5
13690	170	NQVAMNPTNTVFDAK	15	0	1648.79	IPI00003865;IPI00981943;IPI00980749;IPI00037070;IPI00910870;IPI01008803;IPI00981429;IPI00981268;IPI00980651;IPI00983926	IPI00003865	yes	no	2,3	5.5177e-98	242.07	4	13	4	13
13707	170	NSIESYAFNMK	11	0	1302.59	IPI00003865;IPI00981943;IPI00980749;IPI00980343;IPI00983398;IPI00984555	IPI00003865	yes	no	2,3	2.4642e-23	182.08	8	19	8	19
14692	170	RFDDAVVQSDMK	12	1	1409.66	IPI00003865;IPI00981943;IPI00980749;IPI00037070;IPI00984226;IPI00910870;IPI01008803;IPI00981429;IPI00981268;IPI00980651;IPI00983926;IPI00844513	IPI00003865	yes	no	2,3	2.4441e-55	212.89	18	28	18	28
15330	170	SFYPEEVSSMVITK	14	0	1615.78	IPI00003865;IPI00981943;IPI00037070;IPI00984226;IPI00910870;IPI01008803;IPI00981429;IPI00981268;IPI00980651;IPI00983926;IPI00981926	IPI00003865	yes	no	2,3	3.7047e-147	271.01	4	21	4	21
15608	170	SINPDEAVAYGAAVQAAIISGDK	23	0	2259.14	IPI00003865;IPI00981943;IPI00980749;IPI00037070;IPI00980343	IPI00003865	yes	no	2,3,4	9.5069e-44	161.08	3	10	3	10
15888	170	SQIHDIVIVGGSTR	14	0	1480.8	IPI00003865;IPI00981943;IPI00980749;IPI00037070;IPI00980343;IPI00984226	IPI00003865	yes	no	2,3	1.2429e-23	170.95	10	19	10	19
17107	170	TVTNAVVTVPAYFNDSQR	18	0	1980.99	IPI00003865;IPI00037070;IPI00984226;IPI00910870;IPI01008803;IPI00981429;IPI00981268;IPI00980651;IPI00981926	IPI00003865	yes	no	2,3	8.6427e-40	182.15	1	6	1	6
17315	170	VCNPIITK	8	0	943.516	IPI00003865;IPI00981943;IPI00980749;IPI00980343;IPI00983398	IPI00003865	yes	no	2	0.0086599	95.909	1	3	1	3
19643	170	YKAEDEK	7	1	881.413	IPI00003865;IPI00981943;IPI00980749;IPI00980343;IPI00983398;IPI00984555	IPI00003865	yes	no	2,3	0.054291	98.997	2	5	2	5
9776	171	IMIHQPSGGAR	11	0	1165.6	IPI00003870	IPI00003870	yes	yes	3	0.070209	63.283	1	3	1	3
19684	171	YMSPMEAQEFGIIDK	15	0	1757.8	IPI00003870	IPI00003870	yes	yes	3	3.7541e-08	133.15	1	4	1	4
2246	172	DISYCISGMYDHR	13	0	1615.68	IPI00003881;IPI01010852	IPI00003881	yes	no	3	4.6131e-21	167.3	1		1
4892	172	FMSVQRPGPYDRPGTAR	17	2	1933.96	IPI00003881;IPI01010852	IPI00003881	yes	no	4	0.18837	75.764	2	2	2	2
7154	172	HSGPNSADSANDGFVR	16	0	1629.71	IPI00003881;IPI01010852	IPI00003881	yes	no	3	5.0701e-35	181.98	1	4	1	4
10717	172	ITGEAFVQFASQEIAEK	17	0	1866.94	IPI00003881;IPI01010852	IPI00003881	yes	no	3	2.3755e-38	176.23	1	4	1	4
16373	172	TEMDWVIK	8	0	1020.5	IPI00003881;IPI01010852	IPI00003881	yes	no	2	0.00071194	123.92	3	2	3	2
19499	172	YIEVFK	6	0	797.432	IPI00003881;IPI01010852	IPI00003881	yes	no	2	0.024262	114.67	3	7	3	7
19517	172	YIGIVK	6	0	691.427	IPI00003881;IPI01010852	IPI00003881	yes	no	2	0.0378	100.91		5		5
3780	173	ENIESWINYIK	11	0	1407.7	IPI00306380;IPI00003886	IPI00306380	yes	no	3	0.00041746	110.39	2		2
11178	174	IWGTQDVSQDIQEMKDESAR	20	1	2335.07	IPI00922751;IPI00152505;IPI00607720;IPI00003909;IPI01011292;IPI01012190;IPI00816836	IPI00922751	yes	no	3,4	1.5076e-72	202.33	8	9	8	9
14558	174	QVTVIEIFR	9	0	1103.63	IPI00922751;IPI00152505;IPI00607720;IPI00003909;IPI01011292;IPI01012190;IPI00816836	IPI00922751	yes	no	2	0.002601	103.26	3	8	3	8
0	175	AAAAAAAIQAK	11	0	955.545	IPI00003918;IPI00795303;IPI00792159	IPI00003918	yes	no	2	8.539e-32	192.32	5	7	5	7
1104	175	APIRPDIVNFVHTNIR	16	1	1861.03	IPI00003918;IPI00795303;IPI00908376;IPI00794736;IPI00793341;IPI00794087	IPI00003918	yes	no	2,3,4	1.0381e-18	154.1	21	18	21	18
1550	175	AWNDIK	6	0	745.376	IPI00003918;IPI00795303;IPI00908662	IPI00003918	yes	no	2	0.076321	85.306	1	3	1	3
2935	175	EAVIIIK	7	0	784.506	IPI00003918;IPI00908662	IPI00003918	yes	no	2	0.0058504	137.77	1	6	1	6
4358	175	FCIWTESAFR	10	0	1315.6	IPI00003918;IPI00795303;IPI00908662	IPI00003918	yes	no	2	3.8846e-05	135.71	4	3	4	3
7958	175	IEEVPEIPIVVEDK	14	0	1607.87	IPI00003918;IPI00908662	IPI00003918	yes	no	2,3	3.3561e-32	181.98	4	14	4	14
7959	175	IEEVPEIPIVVEDKVEGYK	19	1	2184.16	IPI00003918;IPI00908662	IPI00003918	yes	no	3	4.4059e-29	157.68	2	2	2	2
11910	175	KIDEIYGTWR	10	1	1279.66	IPI00003918;IPI00795303;IPI00908662	IPI00003918	yes	no	2,3	1.8266e-34	198.25	11	15	11	15
12263	175	KPTTEEK	7	1	831.434	IPI00003918;IPI00795303;IPI00908662;IPI00792159	IPI00003918	yes	no	3	0.11207	67.981		2		2
12927	175	MINTDISR	8	0	948.47	IPI00003918;IPI00795303;IPI00908662;IPI00953651	IPI00003918	yes	no	2	0.029295	77.923		4		4
13505	175	NIPGITIINVSK	12	0	1267.75	IPI00003918;IPI00795303;IPI00908662	IPI00003918	yes	no	2,3	1.585e-12	153.38	2	11	2	11
13810	175	NVTIPAVFK	9	0	987.575	IPI00003918;IPI00795303;IPI00908376;IPI00794736;IPI00793341;IPI00794087	IPI00003918	yes	no	2,3	7.8319e-06	132.01	3	12	3	12
13898	175	PIISVYSEK	9	0	1034.56	IPI00003918;IPI00795303;IPI00908376;IPI00794736;IPI00793341;IPI00794087	IPI00003918	yes	no	2	6.5784e-08	144.12		3		3
19191	175	YAICSAIAASAIPAIVMSK	19	0	1936.02	IPI00003918;IPI00795303;IPI00908662	IPI00003918	yes	no	3	2.4701e-29	154.6	5	6	5	6
8290	176	IFSSFIK	7	0	840.475	IPI00003921;IPI00218697;IPI00218700;IPI00739613;IPI00553103;IPI00979898;IPI00791144	IPI00003921	yes	no	2	0.020129	97.068	1	1	1	1
134	177	AAWEAYISR	9	0	1065.52	IPI00003923;IPI01013339;IPI00914059;IPI00398067;IPI00913856;IPI00913888	IPI00003923	yes	no	2	0.0033825	101.54	2	2	2	2
4534	177	FGDFVIK	7	0	824.443	IPI00003923;IPI00914059;IPI00947553;IPI00945224;IPI00945051;IPI00945920	IPI00003923	yes	no	2	0.02277	94.262	2	1	2	1
5992	177	GIQEVGIPIHR	11	0	1217.69	IPI00003923;IPI01013339;IPI00914059;IPI00398067;IPI00913856	IPI00003923	yes	no	3	0.00049803	108.47	1	3	1	3
7601	177	IASWADIVNAHVVPGSGVVK	20	0	2018.09	IPI00003923;IPI01013339;IPI00398067;IPI00913856	IPI00003923	yes	no	3	1.5048e-14	122.31	2	2	2	2
12872	177	MIEIIEQQK	9	0	1130.6	IPI00003923;IPI01013339;IPI00914059;IPI00398067;IPI00947553;IPI00913888	IPI00003923	yes	no	3	0.042015	69.954		4		4
1715	178	DAINQGMDEEIERDEK	16	1	1890.83	IPI00003925;IPI00549885;IPI00946404;IPI00947129;IPI00947319	IPI00003925	yes	no	3	4.9979e-26	170.95	1	7	1	7
1839	178	DFIIPIGK	8	0	901.527	IPI00003925;IPI00549885;IPI00946404;IPI00947129;IPI00947319;IPI00555722	IPI00003925	yes	no	2	0.001266	116.73	3	9	3	9
2126	178	DIIFAIK	7	0	818.49	IPI00003925;IPI00549885;IPI00946404	IPI00003925	yes	no	2	0.0025357	137.77	5	11	5	11
8891	178	IIEDNSIPQVK	11	0	1254.68	IPI00003925;IPI00549885;IPI00946404	IPI00003925	yes	no	2	1.3955e-06	138.99	2	1	2	1
9738	178	IMEGPAFNFIDAPAVR	16	0	1746.88	IPI00003925;IPI00549885;IPI00946404	IPI00003925	yes	no	2,3	1.1824e-34	177.38	9	15	9	15
16706	178	TIRPMDMETIEASVMK	16	1	1850.89	IPI00003925;IPI00549885;IPI00946404;IPI00947129	IPI00003925	yes	no	3	1.2394e-70	216.15	5	6	5	6
17177	178	TYYMSGGIQPVPIVFR	16	0	1826.94	IPI00003925;IPI00549885;IPI00947129;IPI00947319;IPI00555722	IPI00003925	yes	no	2,3	2.4238e-47	196.95	9	21	9	21
17573	178	VFIIGEEVAQYDGAYK	16	0	1800.89	IPI00003925;IPI00549885;IPI00946404;IPI00947129;IPI00947319	IPI00003925	yes	no	3,4	2.5412e-19	156.36	5	3	5	3
18489	178	VTGADVPMPYAK	12	0	1247.62	IPI00003925;IPI00549885;IPI00946404	IPI00003925	yes	no	2	7.8068e-18	167.6	2	2	2	2
4421	179	FEDENFHYK	9	0	1227.52	IPI00003927	IPI00003927	yes	yes	3	0.036008	72.607	1	2	1	2
9172	179	IIIITEDIK	9	0	1056.64	IPI00003927	IPI00003927	yes	yes	2	0.00017951	118.5	1	3	1	3
4004	180	ESYSIYVYK	9	0	1150.55	IPI00152785;IPI00220403;IPI00515061;IPI00003935;IPI00166293;IPI00454695;IPI00746251	IPI00152785	yes	no	2,3	4.3205e-17	176.79	5	8	5	8
11653	180	KESYSIYVYK	10	1	1278.65	IPI00152785;IPI00220403;IPI00515061;IPI00003935;IPI00166293;IPI00454695;IPI00746251	IPI00152785	yes	no	2,3	1.478e-22	176.95	21	17	21	17
15111	180	SAPAPK	6	0	569.317	IPI00152785;IPI00220403;IPI00515061;IPI00003935;IPI00166293;IPI00646240;IPI00794461;IPI00930174;IPI00930570;IPI00020101;IPI00419833;IPI00152906;IPI00303133;IPI00329665;IPI00018534;IPI00815755;IPI00477495	IPI00646240	no	no	2	0.060192	92.279	2	2
2379	181	DMTVPIIVSKPPVFTGK	17	1	1828.02	IPI00003944;IPI00644810;IPI01013727	IPI00003944	yes	no	3,4	1.6497e-60	205.62	1	6	1	6
2984	181	EDIINYIEK	9	0	1135.58	IPI00003944;IPI00644810;IPI01013727	IPI00003944	yes	no	2	0.0033349	101.65		2		2
9238	181	IIKEDIINYIEK	12	1	1489.84	IPI00003944;IPI00644810;IPI01013727	IPI00003944	yes	no	3	5.1426e-05	125.22	4	2	4	2
2343	182	DKWSPAIQIR	10	1	1212.66	IPI00003949;IPI00376844	IPI00003949	yes	no	3	0.021811	84.213	3	1	3	1
8000	182	IEIFIPEEYPMAAPK	15	0	1746.89	IPI00003949	IPI00003949	yes	yes	3,4	1.7687e-08	136.38	10	11	10	11
8739	182	IIAEPVPGIK	10	0	1035.63	IPI00003949;IPI00376844	IPI00003949	yes	no	2	0.0026719	98.249		5		5
11285	182	IYHPNVDK	8	0	984.503	IPI00003949;IPI00376844	IPI00003949	yes	no	2,3	0.067145	67.169	2	3	2	3
19074	182	WSPAIQIR	8	0	969.54	IPI00003949;IPI00376844	IPI00003949	yes	no	2	0.048925	69.812		1		1
640	183	AIDIIK	6	0	671.422	IPI00221012;IPI00003964;IPI00874074;IPI00744575;IPI00946017;REV__IPI00244391	IPI00221012	yes	no	2	0.10616	94.669		1		1
894	183	AITIQDIDNIWAAQAGK	17	0	1826.95	IPI00221012;IPI00003964;IPI00874074;IPI00744575;IPI00946017	IPI00221012	yes	no	3	5.8724e-13	122.33	1		1
4416	183	FDYDWER	7	0	1029.42	IPI00221012;IPI00003964;IPI00874074;IPI00744575	IPI00221012	yes	no	2	0.18485	57.559	1		1
4904	183	FNDYFEFPR	9	0	1233.55	IPI00221012;IPI00003964;IPI00874074;IPI00744575	IPI00221012	yes	no	2	0.026285	76.943	2	2	2	2
6834	183	HGNPEEEEWITAER	14	0	1695.75	IPI00221012;IPI00003964;IPI00946017	IPI00221012	yes	no	3	1.4238e-07	136.7	2	2	2	2
7150	183	HSGDYFTIIR	10	0	1207.6	IPI00221012;IPI00003964	IPI00221012	yes	no	3	0.032472	70.1	2	2	2	2
9803	183	IMPPDSTTIEK	11	0	1230.62	IPI00221012;IPI00003964	IPI00221012	yes	no	3	0.071493	63.076		1		1
11356	183	IYSVVSQIIR	10	0	1176.69	IPI00221012;IPI00003964;IPI00874074	IPI00221012	yes	no	2,3	3.1568e-07	147.75	14	18	14	18
12322	183	KQNVQFMHNR	10	1	1300.65	IPI00221012;IPI00003964	IPI00221012	yes	no	4	0.059685	67.563	2	1	2	1
13386	183	NHQNIIDSIEQYVK	14	0	1699.85	IPI00221012;IPI00003964	IPI00221012	yes	no	3	0.010518	78.964	1		1
14701	183	RFDYDWER	8	1	1185.52	IPI00221012;IPI00003964;IPI00874074;IPI00744575	IPI00221012	yes	no	3	0.0188	87.323	2	2	2	2
15357	183	SGGIPIVISMITR	13	0	1342.76	IPI00221012;IPI00003964	IPI00221012	yes	no	2,3	2.3288e-36	191.53	15	18	15	18
19122	183	WVIPAIK	7	0	825.511	IPI00221012;IPI00003964;IPI00874074;IPI00744575;IPI00946017	IPI00221012	yes	no	2	0.08033	69.432		2		2
2163	184	DIIQFFKPR	9	1	1162.65	IPI00003965;IPI00646721;IPI01011924;IPI01009317	IPI00003965	yes	no	3	1.9599e-07	144.09	12	8	12	8
4392	184	FDKDHDVMIFIK	12	1	1506.75	IPI00003965;IPI00646721;IPI01011924;IPI01009317	IPI00003965	yes	no	3	0.015234	87.298	2	2	2	2
5255	184	FYPDRPHQK	9	1	1186.59	IPI00003965;IPI00646721;IPI01011924;IPI01009317;IPI00922910	IPI00003965	yes	no	4	0.090116	75.109	2	2	2	2
7134	184	HQYINEDEYEVNIK	14	0	1792.83	IPI00003965;IPI00646721;IPI01011924	IPI00003965	yes	no	3	0.0010664	93.011	1	1	1	1
9934	184	INTDPMIIQFFK	12	0	1465.76	IPI00003965;IPI00646721;IPI01011924;IPI01009317	IPI00003965	yes	no	3	0.0002276	112.15	3		3
10489	184	ISHIFFHK	8	0	1027.56	IPI00003965;IPI00646721;IPI01011924;IPI01009317;IPI00922910	IPI00003965	yes	no	2,3	3.0906e-05	155.75	5	3	5	3
17604	184	VFYEIQHSDKPVGTK	15	1	1746.89	IPI00003965;IPI00646721;IPI01011924;IPI01009317	IPI00003965	yes	no	4	0.02687	75.088		1		1
1686	185	DAFPEAIIVKPSDIFGR	17	1	1873.99	IPI00003968	IPI00003968	yes	yes	3	1.0398e-22	154.47	3	4	3	4
4574	185	FGPIPIGSIGWK	12	0	1270.71	IPI00003968	IPI00003968	yes	yes	2,3	4.2434e-33	188.28	15	17	15	17
4755	185	FINSFASMHR	10	0	1208.58	IPI00003968	IPI00003968	yes	yes	3	0.000447	119.22	4	5	4	5
10018	185	IPHIPGIEDIGIQATPIEIK	20	0	2153.21	IPI00003968;IPI00797261	IPI00003968	yes	no	3	1.8292e-07	97.904		1		1
13322	185	NFDFEDVFVK	10	0	1258.59	IPI00003968	IPI00003968	yes	yes	2,3	3.5918e-05	135.99	6	7	6	7
17547	185	VFEISPFEPWITR	13	0	1619.83	IPI00003968;IPI00797261;IPI01012203	IPI00003968	yes	no	2	0.0021972	95.401	3		3
18644	185	VVQHSNVVINIIGR	14	0	1546.89	IPI00003968	IPI00003968	yes	yes	3	0.0034029	88.101	1		1
18992	185	WISAEIEDVKPAK	13	1	1484.79	IPI00003968;IPI00797261	IPI00003968	yes	no	3,4	0.0024104	103.91	2	2	2	2
19501	185	YIFAVAHR	8	0	975.529	IPI00003968;IPI01012203	IPI00003968	yes	no	3	0.0027127	110.35	3	3	3	3
17080	186	TVMYTAVGSEWRPFGYPR	18	1	2116.02	IPI00003985;IPI00924626;IPI00927724	IPI00003985	yes	no	3	5.8547e-13	118.51	2	2	2	2
17554	186	VFFNIIEEAR	10	0	1236.65	IPI00003985;IPI00924626;IPI00927724	IPI00003985	yes	no	2	0.0016983	103.26	3	3	3	3
4590	187	FHADFIHK	8	0	1013.51	IPI00384428;IPI00003990;IPI00925185	IPI00384428	yes	no	3	0.027957	78.496	1	1	1	1
8309	187	IFTVVAWDPR	10	0	1202.64	IPI00384428;IPI00003990;IPI00909698;IPI00844403	IPI00384428	yes	no	3	0.0018241	102.61	3	2	3	2
12229	187	KPIEAIYGYDYFAR	14	1	1704.85	IPI00384428;IPI00003990	IPI00384428	yes	no	3	7.2426e-07	128.54	3	4	3	4
19112	187	WVDGIR	6	0	744.392	IPI00384428;IPI00003990	IPI00384428	yes	no	2	0.081126	83.229		1		1
16608	188	TIFVSGIPIDIKPR	14	1	1554.91	IPI00908913;IPI00101800;IPI00216935;IPI00004045;IPI00414709;IPI00216936	IPI00908913	yes	no	3	2.0169e-10	145.09	1	1	1	1
9507	189	IIVEIR	6	0	741.475	IPI00218268;IPI00004267;IPI00376226;IPI00816436;IPI00982914	IPI00218268	yes	no	2	0.086594	81.297		4		4
14577	189	QYAGIDHEIAFSR	13	0	1505.73	IPI00218268;IPI00004267;IPI00376226	IPI00218268	yes	no	3	1.1426e-10	146.16	1	1	1	1
1167	190	AQIDEWK	7	0	888.434	IPI00004273;IPI00924634;IPI00926163;IPI00982364	IPI00004273	yes	no	2	0.020671	96.492		2		2
2502	190	DREEDEEDAYER	12	1	1554.61	IPI00004273	IPI00004273	yes	yes	3	0.00095745	109.6		1		1
2987	190	EDINAIEMEEDKR	13	1	1590.72	IPI00004273;IPI00924634;IPI00926163;IPI00979500	IPI00004273	yes	no	3	0.00070311	107.17	1	2	1	2
8733	190	IIAEGHPDPDAEIQR	15	0	1659.82	IPI00004273	IPI00004273	yes	yes	3	0.030011	66.989		4		4
9071	190	IIHDIQIGEK	10	0	1164.65	IPI00004273;IPI00924634;IPI00926163;IPI00982364	IPI00004273	yes	no	3	0.0045763	90.906	2	2	2	2
9626	190	IKEFIEDYDDDRDDPK	16	2	2011.9	IPI00004273	IPI00004273	yes	yes	4	0.024229	87.18	3	1	3	1
14718	190	RFPVAPIIPYPIITK	15	1	1724.04	IPI00004273;IPI00924634;IPI00926163;IPI00979500	IPI00004273	yes	no	3	2.0649e-13	150.69	7	7	7	7
2487	191	DQQDVFCFR	9	0	1213.52	IPI00004312;IPI00956408;IPI00219076;IPI00909389;IPI01010551	IPI00004312	yes	no	3	0.15681	56.258		1		1
8934	191	IIEIVHDHIK	10	0	1215.7	IPI00004312;IPI00956408;IPI00219076	IPI00004312	yes	no	4	0.15745	55.567	2	1	2	1
8993	191	IIFHIR	6	0	797.491	IPI00004312;IPI00956408;IPI00219076	IPI00004312	yes	no	2	0.10835	78.156	2	2	2	2
16336	191	TEDPIISWADFTK	13	0	1521.74	IPI00004312;IPI00956408;IPI00219076	IPI00004312	yes	no	3	0.0019022	97.214	1		1
8888	192	IIEDFIAR	8	0	975.539	IPI00004324;IPI00640089;IPI00647089	IPI00004324	yes	no	2	0.00027791	132.57	3	3	3	3
1218	193	ARPEYMIPVHFYGR	14	1	1734.87	IPI00004358	IPI00004358	yes	yes	2,3,4	1.2254e-22	164.11	12	8	12	8
2741	193	DYFFAIAHTVR	11	0	1338.67	IPI00004358	IPI00004358	yes	yes	2,3	5.5325e-16	164.97	11	9	11	9
6888	193	HIDHVAAIFPGDVDR	15	0	1660.83	IPI00004358	IPI00004358	yes	yes	3	0.0019032	86.772	2	2	2	2
8687	193	IHSEIVK	7	0	824.476	IPI00004358	IPI00004358	yes	yes	3	0.080736	69.383	2	2	2	2
9316	193	IIPIVSDEVFIR	12	0	1399.81	IPI00004358	IPI00004358	yes	yes	3	1.3889e-05	125.74	3		3
11103	193	IVTSIGDVVNHDPVVGDR	18	0	1890.98	IPI00004358;IPI00789185	IPI00004358	yes	no	3	4.46e-19	141		4		4
251	194	AEEWGVQYVETSAK	14	0	1595.75	IPI00004397;IPI00444204;IPI01015571;IPI00926453	IPI00004397	yes	no	3	0.018453	73.881		6		6
6291	194	GQSSIAIHK	9	0	939.514	IPI00004397;IPI00444204;IPI01015571;IPI00926453;IPI00925885;IPI00925636	IPI00004397	yes	no	3	0.038236	71.614		5		5
18102	194	VKAEEDKIPIIVVGNK	16	2	1751.02	IPI00004397;IPI00444204;IPI01015571;IPI00926453	IPI00004397	yes	no	4	0.095049	79.089		1		1
7043	195	HNFPAIFGDVK	11	0	1243.63	IPI00004406;IPI00910040;IPI00926240;IPI00925858;IPI00926459	IPI00004406	yes	no	3	1.2391e-07	147.75	2	2	2	2
11094	195	IVSYFIK	7	0	868.506	IPI00004406;IPI01010160	IPI00004406	yes	no	2	0.012962	107.43	4	8	4	8
13793	195	NVISEYQQRPQR	12	1	1516.77	IPI00004406;IPI01010160	IPI00004406	yes	no	3	0.030633	80.245	1	2	1	2
9789	196	IMMEFER	7	0	954.43	IPI00004416	IPI00004416	yes	yes	2	0.088744	68.422	2	2	2	2
11407	196	KAEAAASAIADADADIEER	19	1	1915.91	IPI00004416	IPI00004416	yes	yes	3	0.0049675	64.565		2		2
12430	196	KTPEEIIR	8	1	984.56	IPI00004416;IPI00647029	IPI00004416	yes	no	3	0.11157	63.565	1		1
2602	197	DTTINEIEDTFR	12	0	1452.67	IPI00946714;IPI00004488;IPI00942404	IPI00946714	yes	no	2	6.6011e-06	126.83		4		4
3312	197	EHPYDAAK	8	0	929.424	IPI00946714;IPI00004488	IPI00946714	yes	no	3	0.11188	60.682	1	2	1	2
2394	198	DNIIDANGGSR	11	0	1130.53	IPI00004497;IPI00472302;IPI01014224;IPI00975613;IPI01015774;IPI01015189	IPI00004497	yes	no	3	0.11454	57.532	3	4	3	4
14801	198	RIEQEVNQER	10	1	1299.65	IPI00004497;IPI00472302;IPI01014224;IPI00975613;IPI01015774;IPI01015189	IPI00004497	yes	no	3	0.0041695	94.309	1		1
16036	198	STIVIHDIIK	10	0	1137.68	IPI00004497;IPI00472302;IPI00332355;IPI00030389;IPI00298955;IPI00930680;IPI01015645;IPI00985292;IPI00872392;IPI00964064	IPI00004497	yes	no	3	0.003333	94.85		2		2
883	199	AITDFFR	7	0	868.444	IPI00004524;IPI00925681;IPI00926799	IPI00004524	yes	no	2	0.012891	110.36	1	2	1	2
3632	199	EIWAAINAWK	10	0	1200.63	IPI00004524;IPI00925681;IPI00926799;IPI00927040	IPI00004524	yes	no	3	0.0015145	104.2	5	3	5	3
9767	199	IMIAMIDR	8	0	961.509	IPI00004524;IPI00925681;IPI00926799;IPI00927040;IPI00926104	IPI00004524	yes	no	2	0.045651	70.912	1	1	1	1
1848	200	DFITHVSAR	9	0	1044.54	IPI00004534;IPI01012022	IPI00004534	yes	no	3	0.0070828	93.429	1		1
5773	200	GHIIYVAISPGQHR	14	0	1546.84	IPI00004534;IPI01012022;IPI01013426	IPI00004534	yes	no	4	6.3603e-11	145.46		2		2
6564	200	GWAAAVTFHPR	11	0	1211.62	IPI00004534;IPI01012022;IPI01013426	IPI00004534	yes	no	2,3	1.9404e-11	160.59	5	6	5	6
11611	200	KEFFIQR	7	1	966.529	IPI00004534;IPI01012022;IPI01013426	IPI00004534	yes	no	3	0.088338	71.029	2	2	2	2
18892	201	WFVFDTETK	9	0	1171.56	IPI00550611;IPI00334011;IPI01009898;IPI00004582	IPI00550611	yes	no	2	0.018156	103.56		1		1
17461	202	VEHSDISFSK	10	0	1147.55	IPI00796379;IPI00004656;IPI00930068	IPI00796379	yes	no	3	0.065232	65.224	1	4	1	4
18199	202	VNHVTISQPK	10	0	1121.62	IPI00796379;IPI00004656	IPI00796379	yes	no	3	0.0030428	96.342	1	7	1	7
6684	204	HADEFIIDIGHHER	14	0	1687.81	IPI00004668;IPI00215828	IPI00004668	yes	no	3,4	5.4342e-41	192.68		2		2
7096	204	HPVIGVHVR	9	0	1012.59	IPI00004668;IPI00302523	IPI00004668	yes	no	2,3	0.025524	77.282	1	2	1	2
19553	204	YIIRPQPWIEK	11	1	1441.81	IPI00004668;IPI00302523	IPI00004668	yes	no	3	0.0001014	129.85	2	2	2	2
38	205	AAEVWMDEYK	10	0	1240.54	IPI00004669;IPI01012012;IPI00922793;IPI00976108;IPI00339297;IPI00976903;IPI00911074	IPI00004669	yes	no	2	1.2351e-22	176.83	1	3	1	3
5233	205	FYFEEIGK	8	0	1031.5	IPI00004669;IPI01012012;IPI00922793	IPI00004669	yes	no	2	0.00040865	128.1	1	3	1	3
5677	205	GGFDWNIVFK	10	0	1181.59	IPI00004669;IPI01012012;IPI00922793;IPI00921824	IPI00004669	yes	no	2	0.001192	107.83	3	3	3	3
11587	205	KEDWNEIDPIK	11	1	1385.68	IPI00004669;IPI00922793	IPI00004669	yes	no	3	0.0018835	97.813	2	2	2	2
12311	205	KQHPYTFPGGSGTVFAR	17	1	1848.93	IPI00004669;IPI01012012;IPI00922793	IPI00004669	yes	no	4	0.0012803	85.837	2	2	2	2
18849	205	WDYMTPEQR	9	0	1224.52	IPI00004669;IPI01012012;IPI00922793;IPI00921824	IPI00004669	yes	no	2	0.065727	66.435	1	3	1	3
19038	205	WPDFNQEAYVGGTMVR	16	0	1868.85	IPI00004669;IPI01012012	IPI00004669	yes	no	3	0.012635	70.373	1	1	1	1
19158	205	WYIENVYPEIR	11	0	1480.74	IPI00004669;IPI01012012;IPI00922793;IPI00976108	IPI00004669	yes	no	2,3	5.7305e-16	164.65	8	7	8	7
2473	206	DQIIYNPFIK	10	0	1249.67	IPI00004670;IPI00916334	IPI00004670	yes	no	3	0.097464	60.518	2	2	2	2
7404	206	IAEVWMDEYK	10	0	1282.59	IPI00004670;IPI00916334;IPI00915831	IPI00004670	yes	no	3	0.0016417	103.55	2	1	2	1
398	207	AFQIMQEEIR	10	0	1263.63	IPI00796891;IPI00004671	IPI00796891	yes	no	2	0.0030428	96.342	1	3	1	3
744	207	AIHTQIEMQAK	11	0	1268.65	IPI00796891;IPI00004671;IPI00945169	IPI00796891	yes	no	3	0.0031298	90.685	1	4	1	4
1206	207	AQVVDIIQQEITAAEQR	17	0	1911.01	IPI00796891;IPI00004671;IPI00945169;IPI00909600	IPI00796891	yes	no	3	6.4645e-30	165.49		4		4
1988	207	DHIWNEIEK	9	0	1182.57	IPI00796891;IPI00004671	IPI00796891	yes	no	3	0.0063211	95.099	1		1
3068	207	EEIQHEFDIIK	11	0	1399.7	IPI00796891;IPI00004671;IPI00945169;IPI00909600	IPI00796891	yes	no	3	1.7281e-05	134.57	1	1	1	1
3555	207	EIQEIIK	7	0	871.501	IPI00796891;IPI00004671;IPI00908744;IPI00917964;IPI00303280;REV__IPI00298007;REV__IPI00607846;IPI00916455;IPI00917879;IPI00915876	IPI00796891	no	no	2	0.012956	107.66	2	3
3589	207	EISNINQIIEEFKK	14	1	1703.91	IPI00796891;IPI00004671;IPI00945169;IPI00909600	IPI00796891	yes	no	3	2.0022e-62	211.38	2		2
3779	207	ENIAQAVEHR	10	0	1165.58	IPI00796891;IPI00004671;IPI00908744	IPI00796891	yes	no	3	0.0012506	107.06	1	3	1	3
4113	207	EVEIQHIR	8	0	1022.55	IPI00796891;IPI00004671;IPI00945169;IPI00909600	IPI00796891	yes	no	3	0.03923	73.665	1	2	1	2
5527	207	GEVEEDKENK	10	1	1175.53	IPI00796891;IPI00004671;IPI00945169;IPI00909600	IPI00796891	yes	no	3	0.07674	73.233		4		4
6919	207	HIHHDAGIMR	10	0	1185.58	IPI00796891;IPI00004671	IPI00796891	yes	no	3	0.041188	68.735	1	1	1	1
8058	207	IESSQIQIAGIEHIR	15	0	1692.92	IPI00796891;IPI00004671;IPI00945169	IPI00796891	yes	no	3	9.0051e-17	152.16	2	2	2	2
9640	207	IKESEEANEDIRR	13	2	1587.79	IPI00796891;IPI00004671	IPI00796891	yes	no	3	0.16043	85.845	1	2	1	2
10305	207	IQQINSNFSQIIEEK	15	0	1789.92	IPI00796891;IPI00004671;IPI00946934	IPI00796891	yes	no	3	0.0021553	85.837		1		1
11590	207	KEEDVSYISGQISEK	15	1	1710.83	IPI00796891;IPI00004671;IPI00945169	IPI00796891	yes	no	3	1.19e-05	112.5		1		1
11938	207	KIEEHEESIVGR	12	1	1424.73	IPI00796891;IPI00004671;IPI00945169;IPI00909600	IPI00796891	yes	no	3	0.21143	53.567	1		1
12073	207	KIQAAIISR	9	1	998.624	IPI00796891;IPI00004671;IPI00945169	IPI00796891	yes	no	3	0.089418	65.246		2		2
13021	207	MNIINQQIQEEISR	14	0	1714.87	IPI00796891;IPI00004671	IPI00796891	yes	no	3	5.4181e-51	203.51		4		4
14800	207	RIEQAEEK	8	1	1001.51	IPI00796891;IPI00004671;IPI00908744	IPI00796891	yes	no	3	0.010743	95.531	1	2	1	2
15626	207	SIQEEISIAR	10	0	1144.61	IPI00796891;IPI00004671;IPI00945169	IPI00796891	yes	no	2	0.10495	59.426		3		3
2333	208	DKPEEQWWNAEDSEGKR	17	2	2102.93	IPI00004838;IPI00399054;IPI00305469	IPI00004838	yes	no	3,4	0.00038447	98.676	2	2	2	2
5762	208	GHFPFTHVR	9	0	1096.56	IPI00004838	IPI00004838	yes	yes	2,3	9.7399e-06	130.22	11	9	11	9
8717	208	IHYIDTTTIIEPVSR	15	0	1756.94	IPI00004838;IPI00399054;IPI00305469	IPI00004838	yes	no	3	3.8399e-06	119.69	1	2	1	2
15996	208	SSWYWGR	7	0	940.419	IPI00004838;IPI00399054;IPI00305469	IPI00004838	yes	no	2	0.0054223	138.85	8	9	8	9
5875	209	GIFPFTHVK	9	0	1044.58	IPI00004839	IPI00004839	yes	yes	2,3	2.4272e-11	152.63	11	12	11	12
8363	209	IGDQEFDHIPAIIEFYK	17	0	2034.01	IPI00004839	IPI00004839	yes	yes	3	6.5786e-30	165.34	3	2	3	2
8716	209	IHYIDTTTIIEPAPR	15	0	1738.93	IPI00004839	IPI00004839	yes	yes	3	1.5165e-11	141.58	1	3	1	3
11784	209	KGIFPFTHVK	10	1	1172.67	IPI00004839	IPI00004839	yes	yes	3,4	0.00021463	126.31	8	5	8	5
15142	209	SAWYMGPVSR	10	0	1152.54	IPI00004839	IPI00004839	yes	yes	2	9.2649e-05	130.66	1	2	1	2
16238	209	TAIAIEVGDIVK	12	0	1227.71	IPI00004839	IPI00004839	yes	yes	3	0.024131	72.2		1		1
16751	209	TIYDFPGNDAEDIPFK	16	0	1840.85	IPI00004839	IPI00004839	yes	yes	3	8.1953e-08	110.77		3		3
17660	209	VGMIPVPYVEK	11	0	1230.67	IPI00004839	IPI00004839	yes	yes	3	0.00062196	105.52	2	3	2	3
18408	209	VSHYIINSIPNR	12	0	1411.76	IPI00004839	IPI00004839	yes	yes	3	7.0347e-05	117.25		2		2
18409	209	VSHYIINSIPNRR	13	1	1567.86	IPI00004839	IPI00004839	yes	yes	4	0.0079451	87.184	1	4	1	4
10957	210	IVGVFHTEYGAINR	14	0	1574.82	IPI00004845	IPI00004845	yes	yes	3	0.025259	69.864	3	2	3	2
13014	210	MNEFIENFEK	10	0	1299.58	IPI00004845	IPI00004845	yes	yes	3	0.00011804	128.27	2	2	2	2
13028	210	MNTVFHIWK	9	0	1174.6	IPI00004845	IPI00004845	yes	yes	2,3	0.0029347	102.52	9	10	9	10
14580	210	QYDGIFYEFR	10	0	1336.61	IPI00004845	IPI00004845	yes	yes	2	0.001419	104.82	1	3	1	3
17744	210	VHVIWWNESADSR	13	0	1597.76	IPI00004845;IPI00020035	IPI00004845	yes	no	3	1.0814e-27	176.48	4	3	4	3
3329	211	EIAENITK	8	0	916.487	IPI00004860;IPI00759723	IPI00004860	yes	no	2	0.00081981	122.52	2	6	2	6
4405	211	FDTEEEFK	8	0	1043.44	IPI00004860;IPI00759723	IPI00004860	yes	no	2	0.0033608	107.66		5		5
5549	211	GFDIIGIK	8	0	861.496	IPI00004860;IPI00759723	IPI00004860	yes	no	3	0.023913	80.229		1		1
5550	211	GFDIIGIKPVQR	12	1	1341.78	IPI00004860;IPI00759723	IPI00004860	yes	no	3	0.016709	86.344	2	2	2	2
6180	211	GNTAAYIIYAFTR	13	0	1459.75	IPI00004860;IPI00759723	IPI00004860	yes	no	2,3	2.2091e-46	201.04	11	12	11	12
7510	211	IANIDEEMIQK	11	0	1302.65	IPI00004860;IPI00759723	IPI00004860	yes	no	2	0.097765	84.507	1		1
8147	211	IFEFAGYDVIR	11	0	1328.68	IPI00004860;IPI00759723	IPI00004860	yes	no	2	0.0001651	117.02	5	5	5	5
9119	211	IIIDHEKEWK	10	1	1309.7	IPI00004860;IPI00759723	IPI00004860	yes	no	3	0.044948	78.334	1	1	1	1
9722	211	IMDIIGEGIK	10	0	1087.59	IPI00004860;IPI00759723	IPI00004860	yes	no	2,3	2.9567e-07	147.95	5	4	5	4
9723	211	IMDIIGEGIKR	11	1	1243.7	IPI00004860;IPI00759723	IPI00004860	yes	no	3	0.010128	80.706	4	2	4	2
9838	211	INDYIFSFDK	10	0	1260.6	IPI00004860;IPI00759723	IPI00004860	yes	no	2,3	1.2824e-16	172.8	7	8	7	8
10211	211	IQEVFGHAIK	10	0	1140.63	IPI00004860;IPI00759723;IPI00984107;IPI00973800	IPI00004860	yes	no	2,3	2.9965e-07	147.91	4	4	4	4
10944	211	IVFVPGCSIPITIVK	15	0	1641.95	IPI00004860;IPI00759723	IPI00004860	yes	no	3	0.10372	56.956	1		1
13600	211	NMINIISR	8	0	959.522	IPI00004860;IPI00984107;IPI00973800	IPI00004860	yes	no	2	0.030789	77.282	1	2	1	2
14699	211	RFDTEEEFK	9	1	1199.55	IPI00004860;IPI00759723	IPI00004860	yes	no	3	0.0098946	91.867	1	2	1	2
17463	211	VEIAGPGFINVHIR	14	0	1520.85	IPI00004860;IPI00759723	IPI00004860	yes	no	3	9.7779e-41	189.24		1		1
3358	212	EIDGGIETIR	10	0	1101.57	IPI00004902;IPI00556451	IPI00004902	yes	no	2	0.0013152	106.2	3	7	3	7
3712	212	EKVDIVIIGK	10	1	1112.68	IPI00004902;IPI00556451	IPI00004902	yes	no	3	1.5098e-06	145.89	5	6	5	6
5918	212	GIHVEVPPAEAER	13	0	1402.72	IPI00004902;IPI00556451	IPI00004902	yes	no	3	0.014429	79.82		5		5
7164	212	HSMNPFCEIAVEEAVR	16	0	1887.86	IPI00004902;IPI00556451	IPI00004902	yes	no	3	1.3164e-14	148.52	1	1	1	1
8083	212	IEVIKPGDIGVDITSK	16	1	1682.95	IPI00004902;IPI00556451	IPI00004902	yes	no	3	1.6221e-34	181.71	2	8	2	8
9666	212	IKIPAVVTADIR	12	1	1294.8	IPI00004902;IPI00556451	IPI00004902	yes	no	3	0.0063062	93.096	4	5	4	5
17380	212	VDIVIIGK	8	0	855.543	IPI00004902;IPI00556451	IPI00004902	yes	no	2	0.0073581	98.392	1	4	1	4
17506	212	VETTEDIVAK	10	0	1103.57	IPI00004902;IPI00556451	IPI00004902	yes	no	2	0.00012341	127.76	3	2	3	2
17794	212	VIDYAVK	7	0	806.454	IPI00004902	IPI00004902	yes	yes	2	0.02277	94.262	1	3	1	3
842	213	AIQDEWDAVMIHSFTIR	17	0	2030.99	IPI00004968;IPI01011381	IPI00004968	yes	no	3	3.2388e-15	135.72	3		3
2858	213	EAIATIK	7	0	744.438	IPI00004968;IPI01011381;IPI01009194	IPI00004968	yes	no	2	0.075021	70.268		4		4
9462	213	IITGGADK	8	0	773.428	IPI00004968	IPI00004968	yes	yes	2	0.044648	71.342	1	6	1	6
14064	213	QEISHAIYQHDAACR	15	0	1797.82	IPI00004968;IPI01011381;IPI01009194	IPI00004968	yes	no	3,4	1.0274e-24	172.76	2	3	2	3
15931	213	SSEQIIATIK	10	0	1088.61	IPI00004968	IPI00004968	yes	yes	2,3	0.00076631	113.47	1	3	1	3
17086	213	TVPEEIVKPEEISK	14	1	1596.86	IPI00004968;IPI01011381;IPI01014174	IPI00004968	yes	no	3	3.2962e-16	160.15	2	7	2	7
17237	213	VAHPIRPKPPSATSIPAIIK	20	2	2092.25	IPI00004968;IPI01011381	IPI00004968	yes	no	3	0.00022346	96.489	1		1
8587	214	IHDIYWQAMK	10	0	1303.64	IPI00607584;IPI00005024	IPI00607584	yes	no	3	0.0013758	105.4	2	3	2	3
9013	214	IIGAAIPIITK	11	0	1108.72	IPI00607584;IPI00005024;IPI00908888	IPI00607584	yes	no	3	0.0082576	80.755		6		6
12057	214	KIPAIAIDIIR	11	1	1221.78	IPI00607584;IPI00005024;IPI00908888	IPI00607584	yes	no	3	7.8186e-05	125.75	4	4	4	4
2697	215	DVYEDEIVPVFEAVGR	16	0	1835.89	IPI00169342;IPI00005042;IPI00965625;IPI00965845;IPI00965724;IPI00967035;IPI00968211;IPI00966779;IPI00964320;IPI00964984	IPI00169342	yes	no	3	0.0014386	85.42	1		1
6608	215	GYAFVMYCHK	10	0	1274.56	IPI00169342;IPI00005042;IPI00965625;IPI00965845;IPI00965724;IPI00967035;IPI00968211;IPI00966779;IPI00964320	IPI00169342	yes	no	3	0.0035856	93.551	1	3	1	3
12614	215	KYGGPPPGWEGPHPQR	16	1	1758.86	IPI00169342;IPI00005042;IPI00965625;IPI00965845;IPI00965724;IPI00967035;IPI00968211;IPI00966779;IPI00964320;IPI00964984	IPI00169342	yes	no	4	0.074456	61.167	1	1	1	1
18261	215	VPEGVAGAPNEAAIIAIMER	20	0	2007.05	IPI00169342;IPI00005042;IPI00965625;IPI00965845;IPI00965724;IPI00967035;IPI00968211;IPI00966779;IPI00964984;IPI00967966	IPI00169342	yes	no	3	8.7992e-22	136.63		2		2
4622	216	FHWEQDQIAHMK	12	0	1568.72	IPI00068506;IPI00005045	IPI00068506	yes	no	4	0.00044267	106.4	2	4	2	4
9079	216	IIHGIGFTPAMQR	13	0	1439.77	IPI00068506;IPI00005045;IPI01015269;IPI00925351	IPI00068506	yes	no	3	0.00068933	104.82	3	5	3	5
9461	216	IITGEIIPTDGMIR	14	0	1527.83	IPI00068506;IPI00005045	IPI00068506	yes	no	2,3	0.0020896	90.861		5		5
10073	216	IPPPVIMVQNVSFK	14	0	1567.88	IPI00068506;IPI00005045	IPI00068506	yes	no	3	0.10573	58.274	1	1	1	1
9350	217	IIQDVADEEIAAIPR	15	0	1651.88	IPI00005050	IPI00005050	yes	yes	3	9.5279e-05	99.941	2		2
10112	218	IPVPASAPIPFFHR	14	0	1547.86	IPI00221393;IPI00005068;IPI00642657	IPI00221393	yes	no	3	6.3476e-07	127.87	7	7	7	7
694	219	AIETNTHVK	9	0	1011.53	IPI00005087;IPI00005089;IPI00794581	IPI00005087	yes	no	3	0.013677	84.615		7		7
2500	219	DREDYVPYTGEK	12	1	1470.66	IPI00005087	IPI00005087	yes	yes	3	1.1604e-08	143	1	2	1	2
3297	219	EHIISYIEK	9	0	1130.6	IPI00005087	IPI00005087	yes	yes	3	0.0013532	108.74	2	1	2	1
9329	219	IIPVFDEPPNPTNVEESIK	19	0	2137.09	IPI00005087	IPI00005087	yes	yes	3	1.6877e-24	143.97		4		4
12868	219	MIEENTNIIK	10	0	1203.62	IPI00005087	IPI00005087	yes	yes	2	0.00043539	119.53	2	4	2	4
14365	219	QKPVQTFTEEK	11	1	1333.69	IPI00005087	IPI00005087	yes	yes	3	1.014e-07	149.96		3		3
15776	219	SNDPVATAFAEMIK	14	0	1492.72	IPI00005087	IPI00005087	yes	yes	2,3	4.5226e-32	180.78	5	6	5	6
19648	219	YKDIDEDEIIGNISETEIK	19	1	2223.08	IPI00005087	IPI00005087	yes	yes	3	2.1807e-94	222.57	3	3	3	3
10362	220	IQYTEHQQIEGWR	13	0	1686.81	IPI00037599;IPI00791184;IPI00005099;IPI00953927;IPI00140998	IPI00037599	yes	no	3	0.0031283	92.247	3	1	3	1
13202	221	MVWEIIHR	8	0	1082.57	IPI00914975;IPI00005101	IPI00914975	yes	no	3	0.0056535	101.64	3		3
7173	222	HSTIDFMIGAK	11	0	1218.61	IPI00005102;IPI00642393	IPI00005102	yes	no	3	0.00052669	107.79	1	2	1	2
9122	222	IIIDISMK	8	0	931.541	IPI00005102;IPI00642393;IPI00909795	IPI00005102	yes	no	2	7.0513e-05	143.85		3		3
2399	223	DNIQIPIQFISR	12	0	1442.79	IPI00005107	IPI00005107	yes	yes	2,3	5.6857e-09	139.46	2	6	2	6
4246	223	EYFDQHFGPFFR	12	0	1588.71	IPI00005107;IPI00646796;IPI01010174	IPI00005107	yes	no	3	0.0056528	86.313	4	3	4	3
4768	223	FIPMFISDNPNPK	13	0	1518.75	IPI00005107;IPI00646796;IPI00647735	IPI00005107	yes	no	3	7.4747e-16	158.05	2	3	2	3
6938	224	HIIQIQSIK	9	0	1078.65	IPI00005128;IPI00793960;IPI00984831;IPI00181100	IPI00005128	yes	no	3	0.03806	71.692	1	3	1	3
6939	224	HIIQIQSIKEEK	12	1	1464.83	IPI00005128;IPI00793960;IPI00984831;IPI00181100	IPI00005128	yes	no	4	0.058111	74.841	2		2
8009	224	IEIQIIEHSISTNK	14	0	1623.88	IPI00005128;IPI00793960;IPI00984831;IPI00181100	IPI00005128	yes	no	3	0.00018912	108.59	2	2	2	2
8024	224	IENYIQDNMK	10	0	1266.59	IPI00005128;IPI00793960;IPI00984831	IPI00005128	yes	no	3	0.00010121	129.85		4		4
14261	224	QIIDQTSEINK	11	0	1287.67	IPI00005128;IPI00793960;IPI00984831;IPI00181100	IPI00005128	yes	no	2	0.046956	88.596	1		1
14404	224	QNSIIEEIEK	10	0	1201.62	IPI00005128;IPI00793960;IPI00984831;IPI00181100	IPI00005128	yes	no	3	0.014487	78.655		4		4
14666	224	REDGSVDFQR	10	1	1207.56	IPI00005128;IPI00793960;IPI00984831;IPI00181100	IPI00005128	yes	no	3	0.00050073	120.12	1	1	1	1
220	225	ADVIQATGDAICIFR	15	0	1648.82	IPI00005154;IPI00985291;IPI00981139	IPI00005154	yes	no	3	5.1809e-06	116.84		5		5
1279	225	ASSGIIYPIER	11	0	1204.65	IPI00005154	IPI00005154	yes	yes	2	0.01123	79.201		3		3
4374	225	FDEISFVNFAR	11	0	1343.65	IPI00005154	IPI00005154	yes	yes	2,3	1.6376e-31	188.04	7	7	7	7
5614	225	GFIYVHKPPVHIR	13	1	1561.89	IPI00005154	IPI00005154	yes	yes	3,4,5	2.3929e-20	162.36	21	11	21	11
6081	225	GKDPNAPK	8	1	825.434	IPI00005154	IPI00005154	yes	yes	3	0.071335	80.165		2		2
6591	225	GWNWGTVK	8	0	946.466	IPI00005154;IPI00985291;IPI00981139;IPI00556260	IPI00005154	yes	no	2	2.1662e-05	157.86	2	5	2	5
8127	225	IFDFVNAK	8	0	952.502	IPI00005154	IPI00005154	yes	yes	2,3	0.0016144	114.89	5	8	5	8
8225	225	IFIIPHK	7	0	866.538	IPI00005154;IPI00985291;IPI00981139	IPI00005154	yes	no	2,3	0.012978	106.76	10	16	10	16
11331	225	IYPTFIHIHGK	11	0	1324.73	IPI00005154;IPI00985291;IPI00981139	IPI00005154	yes	no	2,3,4	3.9248e-11	158.79	8	6	8	6
14146	225	QGIIFK	6	0	704.422	IPI00005154;IPI00556260	IPI00005154	yes	no	2	0.022017	121.87	1	6	1	6
14920	225	RPMSAYMIWINASR	14	1	1694.84	IPI00005154	IPI00005154	yes	yes	2,3	1.4944e-12	150.69	5	5	5	5
17392	225	VDNIQAGEITEGIWR	15	0	1699.85	IPI00005154;IPI00556260	IPI00005154	yes	no	3	1.3269e-17	160.84		3		3
1140	226	AQAVIEEDHYGMEDVK	16	0	1832.83	IPI00005158;IPI00334291;IPI00642982	IPI00005158	yes	no	3	1.4877e-34	175.29	1	4	1	4
1141	226	AQAVIEEDHYGMEDVKK	17	1	1960.92	IPI00005158;IPI00334291;IPI00642982	IPI00005158	yes	no	4	2.0699e-05	98.943	1	1	1	1
1773	226	DDKDAIEEK	9	1	1061.49	IPI00005158;IPI00334291;IPI00642982	IPI00005158	yes	no	3	0.012089	100.02		4		4
2117	226	DIIAINPIYR	10	0	1186.67	IPI00005158;IPI00334291;IPI00642982	IPI00005158	yes	no	2,3	0.0019305	102.06	2	7	2	7
3106	226	EFEISK	6	0	751.375	IPI00005158;IPI00334291;IPI00642982;REV__IPI00254484;REV__IPI00639852;REV__IPI00843911	IPI00005158	yes	no	2	0.027451	106.29		3		3
3409	226	EIFDIAFPDEQAEAIAVER	19	0	2162.05	IPI00005158;IPI00334291;IPI00642982	IPI00005158	yes	no	3	2.0137e-36	171.08	2		2
3998	226	ESVIQMMQAGQR	12	0	1376.65	IPI00005158;IPI00334291;IPI00642982	IPI00005158	yes	no	2,3	1.4719e-14	162.26	5	11	5	11
5077	226	FSVGGMTDVAEIK	13	0	1352.66	IPI00005158;IPI00334291;IPI00642982	IPI00005158	yes	no	2	2.43e-36	191.29	2	4	2	4
5424	226	GDKDGSIEVTGQIGEVMK	18	1	1861.91	IPI00005158;IPI00334291;IPI00642982	IPI00005158	yes	no	3	9.1188e-24	155.57		5		5
7251	226	HVMDVVDEEISK	12	0	1399.67	IPI00005158;IPI00334291;IPI00642982	IPI00005158	yes	no	2,3	5.9342e-05	118.9	4	7	4	7
7564	226	IAQPYVGVFIK	11	0	1233.71	IPI00005158;IPI00334291	IPI00005158	yes	no	2,3	5.8711e-16	164.43	2	16	2	16
7659	226	IAYTFAR	7	0	840.449	IPI00005158;IPI00334291;IPI00642982	IPI00005158	yes	no	2	0.012978	106.76	1	6	1	6
8470	226	IGIIDNHSSEFNVTR	15	0	1700.85	IPI00005158;IPI00334291;IPI00642982	IPI00005158	yes	no	3	1.7564e-06	124.12	2	3	2	3
8789	226	IICFYGPPGVGK	12	0	1306.67	IPI00005158;IPI00334291;IPI00642982	IPI00005158	yes	no	3	0.001671	96.342		4		4
8903	226	IIEFIAVSQIR	11	0	1287.76	IPI00005158;IPI00334291;IPI00642982	IPI00005158	yes	no	2,3	4.0057e-35	130.01	14	4	14	4
9330	226	IIPVGGIK	8	0	795.522	IPI00005158;IPI00334291;IPI00642982	IPI00005158	yes	no	2	0.00032269	131.04	2	5	2	5
9636	226	IKEIVVPK	8	1	924.601	IPI00005158;IPI00334291;IPI00642982	IPI00005158	yes	no	3	0.045146	87.616	1	3	1	3
10592	226	ISSDVITIIIK	11	0	1200.73	IPI00005158;IPI00334291;IPI00642982	IPI00005158	yes	no	2,3	3.145e-32	195.27	19	11	19	11
10918	226	IVEIIR	6	0	741.475	IPI00005158;IPI00334291	IPI00005158	no	no	2	0.021587	123.34	2	6
12623	226	KYIIQEQIK	9	1	1161.68	IPI00005158;IPI00334291;IPI00642982	IPI00005158	yes	no	3	0.081051	66.27	2	1	2	1
16384	226	TENPIIIIDEVDK	13	0	1497.79	IPI00005158;IPI00334291;IPI00642982	IPI00005158	yes	no	2,3	3.777e-36	188.13	2	14	2	14
16788	226	TKTENPIIIIDEVDK	15	1	1726.94	IPI00005158;IPI00334291;IPI00642982	IPI00005158	yes	no	3	0.053858	99.844		1		1
17176	226	TYVGAMPGK	9	0	922.458	IPI00005158;IPI00334291;IPI00642982	IPI00005158	yes	no	2	0.013982	84.213	1	1	1	1
19549	226	YIIQEQIK	8	0	1033.58	IPI00005158;IPI00334291;IPI00642982	IPI00005158	yes	no	2	0.002546	111.04		5		5
19624	226	YIVPQAR	7	0	845.476	IPI00005158;IPI00334291;IPI00642982	IPI00005158	yes	no	2	0.0416	82.263		3		3
19824	226	YSNENIDIAR	10	0	1193.57	IPI00005158;IPI00334291;IPI00642982	IPI00005158	yes	no	2	0.00036561	121.36		5		5
2187	227	DIMVGDEASEIR	12	0	1333.62	IPI00470573;IPI00005159	IPI00470573	yes	yes	2	7.5982e-13	158.05	2	5	2	5
2303	227	DKDNFWMTR	9	1	1211.54	IPI00470573;IPI00005159;IPI01014716	IPI00470573	yes	no	2,3	0.00052052	118.71	4	3	4	3
6606	227	GYAFNHSADFETVR	14	0	1612.73	IPI00470573;IPI00005159;IPI01014716;IPI00909247	IPI00470573	yes	no	3	1.1931e-10	140.78	2	1	2	1
6985	227	HIVISGGSTMYPGIPSR	17	0	1770.91	IPI00470573;IPI00005159;IPI01014716;IPI00909247	IPI00470573	yes	no	3	3.5072e-23	154.47	1	4	1	4
6997	227	HIWDYTFGPEK	11	0	1391.65	IPI00470573;IPI00005159;IPI01014716;IPI00909247	IPI00470573	yes	no	2,3,4	3.2438e-07	142.83	6	9	6	9
9210	227	IIITEPPMNPTK	12	0	1352.74	IPI00470573;IPI00005159;IPI01014716;IPI00909247	IPI00470573	yes	no	3	0.011338	79.659	2	5	2	5
17662	227	VGNIEIK	7	0	771.449	IPI00470573;IPI00005159	IPI00470573	yes	no	2	0.042385	81.784	1	6	1	6
1278	228	ASSEGGTAAGAGIDSIHK	18	0	1627.78	IPI00005160;IPI00737530	IPI00005160	yes	no	3	1.8958e-39	178.23		6		6
3305	228	EHNGQVTGIDWAPESNR	17	0	1908.87	IPI00005160;IPI00737530;IPI00927418;IPI00925033;IPI00924615;IPI00927612;IPI00927861;IPI00927206;IPI00925248	IPI00005160	yes	no	3	1.412e-13	126.48	1	3	1	3
4109	228	EVEERPAPTPWGSK	14	1	1581.78	IPI00005160;IPI00737530;IPI00927418	IPI00005160	yes	no	3	3.8338e-07	136.93	2	8	2	8
13266	228	NAYVWTIK	8	0	993.528	IPI00005160;IPI00737530;IPI00927418;IPI00925033;IPI00924615;IPI00927612;IPI00927861;IPI00927206;IPI00925248	IPI00005160	yes	no	2,3	0.0001824	135.83	4	10	4	10
15498	228	SIESAIK	7	0	746.417	IPI00005160;IPI00737530	IPI00005160	yes	no	2	0.080736	69.383		1		1
16902	228	TQIAICPNNHEVHIYEK	17	0	2065.01	IPI00005160;IPI00737530;IPI00927418;IPI00925033;IPI00924615;IPI00927612;IPI00927861;IPI00927206;IPI00925248	IPI00005160	yes	no	4	0.00067068	88.561	1	1	1	1
17124	228	TWKPTIVIIR	10	1	1225.75	IPI00005160;IPI00737530;IPI00927418;IPI00925033;IPI00924615;IPI00927612;IPI00927861;IPI00927206	IPI00005160	yes	no	2,3	3.6168e-10	157.24	15	15	15	15
18800	228	WAPNENK	7	0	857.403	IPI00005160;IPI00737530;IPI00927418;IPI00925033;IPI00924615;IPI00927612	IPI00005160	yes	no	2	0.012884	110.63		5		5
1249	229	ASHTAPQVIFSHR	13	0	1449.75	IPI00005161;IPI00000477;IPI00927156	IPI00005161	yes	no	2,3,4	1.0864e-46	204.85	10	9	10	9
2410	229	DNTINIIHTFR	11	0	1342.7	IPI00005161;IPI00927156	IPI00005161	yes	no	2,3	0.00095039	102.4	5	6	5	6
2534	229	DSIVHQAGMIK	11	0	1197.62	IPI00005161;IPI00000477	IPI00005161	yes	no	3	0.0015857	97.565		4		4
2757	229	DYIHYHIK	8	0	1087.55	IPI00005161;IPI00927156	IPI00005161	yes	no	2,3	3.0906e-05	155.75	8	5	8	5
3553	229	EIQAHGADEIIK	12	0	1322.68	IPI00005161;IPI00000477;IPI00925920;IPI00926315	IPI00005161	yes	no	2,3	5.7748e-25	182.07	4	11	4	11
8900	229	IIEETIAIK	9	0	1028.61	IPI00005161;IPI00925920;IPI00926315;IPI00925705	IPI00005161	yes	no	2,3	6.165e-06	133.57	1	10	1	10
17579	229	VFMQEFK	7	0	927.452	IPI00005161;IPI00000477	IPI00005161	yes	no	2,3	0.0080219	132.29	2	11	2	11
19347	229	YFQFQEEGK	9	0	1174.53	IPI00005161;IPI00000477	IPI00005161	yes	no	2,3	0.0015314	107.57	1	11	1	11
19348	229	YFQFQEEGKEGENR	14	1	1759.78	IPI00005161;IPI00000477	IPI00005161	yes	no	3	2.5078e-16	160.67	1	2	1	2
1588	230	AYIQQIR	7	0	890.497	IPI00005162;IPI00911088	IPI00005162	yes	no	2	0.017306	100.07	1	4	1	4
2564	230	DTDIVDEAIYYFK	13	0	1590.75	IPI00005162;IPI00911088;IPI00796102	IPI00005162	yes	no	3	0.014429	79.82	2		2
4051	230	ETKDTDIVDEAIYYFK	16	1	1948.93	IPI00005162;IPI00911088;IPI00796102	IPI00005162	yes	no	3	4.4161e-34	175.28	3		3
9049	230	IIGNMAIIPIR	11	0	1209.73	IPI00005162;IPI00911088;IPI00796102	IPI00005162	yes	no	2,3	3.1961e-16	168.74	10	25	10	25
19149	230	WWTCFVK	7	0	1025.48	IPI00005162	IPI00005162	yes	yes	2	0.012891	110.36	2	3	2	3
1572	231	AYEKPPEKK	9	2	1088.59	IPI00005198	IPI00005198	yes	yes	2	0.0046324	116.52	1	1	1	1
7824	231	IDPEIHIDIK	10	0	1191.65	IPI00005198	IPI00005198	yes	yes	3	0.0004129	120.12	2	2	2	2
9215	231	IIITTVPPNIR	11	0	1235.76	IPI00005198	IPI00005198	yes	yes	2	0.0097523	79.974	2	5	2	5
9327	231	IIPTIEAVAAIGNK	14	0	1408.83	IPI00005198;IPI00641665	IPI00005198	yes	no	2,3	9.4309e-51	199.8	11	14	11	14
9414	231	IISHGGFR	8	0	885.482	IPI00005198	IPI00005198	yes	yes	2	0.047784	69.998		1		1
11919	231	KIDPEIHIDIK	11	1	1319.74	IPI00005198	IPI00005198	yes	yes	2,3,4	1.0852e-10	154.24	9	14	9	14
13673	231	NQDIAPNSAEQASIISIVTK	20	0	2098.09	IPI00005198;IPI00641665;IPI00643578	IPI00005198	yes	no	3	4.7988e-09	104.88	2	2	2	2
18014	231	VIQSAIAAIR	10	0	1040.63	IPI00005198	IPI00005198	yes	yes	2,3	4.0577e-05	135.55	4	16	4	16
18135	231	VKPAPDETSFSEAIIK	16	1	1730.91	IPI00005198;IPI00641665;IPI00643578	IPI00005198	yes	no	2,3	1.8211e-44	188.39	3	7	3	7
18879	231	WFEENASQSTVK	12	0	1424.66	IPI00005198	IPI00005198	yes	yes	3	0.0041119	89.266	2	8	2	8
1717	232	DAIRDEYDDISDINAVQMESVR	22	1	2553.17	IPI00005202;IPI01015100	IPI00005202	yes	no	3	9.1016e-70	188.58		2		2
1867	232	DFSIEQIR	8	0	1006.51	IPI00005202;IPI01015100	IPI00005202	yes	no	2	0.0010774	119.17	8	12	8	12
3718	232	EKYDYVGR	8	1	1028.49	IPI00005202;IPI01015100	IPI00005202	yes	no	2	0.01676	101.64	1	1	1	1
4209	232	EWEMQFK	7	0	996.438	IPI00005202;IPI01015100	IPI00005202	yes	no	2,3	0.010455	125.25	5	10	5	10
5243	232	FYGPAGPYGIFAGR	14	0	1471.72	IPI00005202;IPI01015100	IPI00005202	yes	no	2,3	1.3337e-77	231.42	28	40	28	40
5881	232	GIGAGAGAGEESPATSIPR	19	0	1696.84	IPI00005202;IPI01015100	IPI00005202	yes	no	2	1.9446e-44	179.17	2	2	2	2
14641	232	RDFSIEQIR	9	1	1162.61	IPI00005202;IPI01015100	IPI00005202	yes	no	3	0.00012919	122.52	1	1	1	1
16531	233	THWGYYTWPK	10	0	1337.62	IPI00005260;IPI00783948;IPI00829629	IPI00005260	yes	no	3	0.00075502	113.62	2	3	2	3
2013	234	DIAHFPAVDPEK	12	0	1337.66	IPI00005270	IPI00005270	yes	yes	3	0.027941	69.979		3		3
15305	235	SFISVFR	7	0	854.465	IPI00005277;IPI01009234	IPI00005277	yes	no	2	0.0054223	138.85	4	5	4	5
15509	235	SIFFGSIIAPVR	12	0	1305.74	IPI00005277	IPI00005277	yes	yes	2	0.00096132	101.39	2	1	2	1
1057	236	ANTNEVIWAVVAAFTK	16	0	1732.91	IPI00005490;IPI01010778	IPI00005490	yes	no	3	0.01001	73.156	1		1
10751	236	ITIMEEVIIIGIK	13	0	1470.87	IPI00005490;IPI01010778;IPI00514951;IPI00012313;IPI00922172;IPI00965013	IPI00005490	yes	no	3	0.019633	77.64	1	1	1	1
6859	237	HHPDIIFCR	9	0	1193.58	IPI00005511	IPI00005511	yes	yes	2,3	0.0059514	95.909		2		2
482	238	AGIKEEETEIK	11	1	1245.65	IPI00005547	IPI00005547	yes	yes	3	0.00050673	116.52		4		4
3341	239	EIAPGIHIR	9	0	1004.58	IPI00005563;IPI00910801;IPI01013625;IPI00910133;IPI00910913	IPI00005563	yes	no	2,3	0.00072756	112.84	3	6	3	6
3923	239	ERDEAGPAPPCMMHSR	16	1	1839.78	IPI00005563;IPI00910801;IPI00979808;IPI01013625;IPI00439435	IPI00005563	yes	no	3	2.1652e-08	119.88	1	1	1	1
5700	239	GGIYSHTPVSIGRPER	16	1	1724.9	IPI00005563;IPI00910801;IPI00979808;IPI01013625	IPI00005563	yes	no	3	2.0963e-08	120.14	2	2	2	2
8548	239	IGSNDKEIMK	10	1	1133.58	IPI00005563;IPI00910801;IPI00979808;IPI01013625;IPI00439435	IPI00005563	yes	no	3	0.078642	72.928		5		5
10722	239	ITGWGEETIPDGR	13	0	1429.68	IPI00005563;IPI00910801;IPI00979808	IPI00005563	yes	no	2,3	1.1053e-36	194.39		8		8
11333	239	IYPVIGTYWDNCNR	14	0	1769.82	IPI00005563;IPI00910801;IPI00979808;IPI01013625;IPI00910133	IPI00005563	yes	no	3	4.0445e-12	150.46	2	2	2	2
19929	239	YWTAANSWGPAWGER	15	0	1750.79	IPI00005563;IPI00910801;IPI00979808	IPI00005563	yes	no	2,3	3.938e-97	235.31	8	7	8	7
9446	240	IISWSDNWR	9	0	1175.57	IPI00005573	IPI00005573	yes	yes	2	2.7236e-11	151.44	1	4	1	4
19114	240	WVEQHIGPQFVER	13	0	1623.82	IPI00005573;IPI00790117	IPI00005573	yes	no	3	0.00683	86.772	2	2	2	2
8142	241	IFEAEAQDIFR	11	0	1337.66	IPI00005578	IPI00005578	yes	yes	2	0.00035577	111.86	2	2	2	2
19337	242	YFIQGMGYIPSASMTR	16	0	1820.86	IPI00005605;IPI00218503;IPI00218504;IPI01012249;IPI01014309	IPI00005605	yes	no	3	1.4348e-07	106.13	2	3	2	3
5676	243	GGFCNFMHIKPISR	14	1	1662.81	IPI00457142;IPI00005613;IPI00619914;IPI00619942	IPI00457142	yes	no	3,4	8.4662e-07	134.13	11	11	11	11
953	244	AKDEQSAVSMIK	12	1	1305.66	IPI00005614;IPI00328230;IPI00333015	IPI00005614	yes	no	3	7.0551e-08	138.99		5		5
1737	244	DASVAEAWIIGQEPYISSR	19	0	2091.03	IPI00005614;IPI00328230;IPI00333015	IPI00005614	yes	no	3	3.4407e-36	169.09	4	4	4	4
1933	244	DGMAFNAIIHK	11	0	1215.61	IPI00005614;IPI00328230;IPI00333015;IPI00977956	IPI00005614	yes	no	3	0.0019733	94.616	2	3	2	3
2032	244	DIDDFQSWISR	11	0	1380.63	IPI00005614;IPI00328230;IPI00333015	IPI00005614	yes	no	2,3	1.0349e-10	152.97	2	10	2	10
2355	244	DMGEMVTQGQTDAQYMFIR	19	0	2219.97	IPI00005614;IPI00328230;IPI00333015	IPI00005614	yes	no	3	5.7152e-95	224.59	1	1	1	1
2626	244	DVEDEIIWVGER	12	0	1458.7	IPI00005614;IPI00328230;IPI00333015	IPI00005614	yes	no	2,3	8.4522e-69	220.1	4	4	4	4
2681	244	DVSSVEIIMNNHQGIK	16	0	1782.89	IPI00005614;IPI00328230;IPI00333015	IPI00005614	yes	no	3	6.4019e-26	162.72		2		2
2826	244	EAEKIESEHPDQAQAIISR	19	1	2150.06	IPI00005614;IPI00328230;IPI00333015	IPI00005614	yes	no	4	1.5897e-05	101.42	1	1	1	1
3188	244	EGEDMIAEEHFGSEK	15	0	1706.71	IPI00005614;IPI00328230;IPI00333015	IPI00005614	yes	no	3	1.2322e-11	143.31		2		2
3240	244	EGMQIISEKPETEAVVK	17	1	1886.97	IPI00005614;IPI00328230;IPI00333015	IPI00005614	yes	no	3	1.5515e-38	183.41	2	7	2	7
3370	244	EIEAENYHDIK	11	0	1359.63	IPI00005614;IPI00328230;IPI00333015;IPI00977956	IPI00005614	yes	no	3	0.024181	72.434	1	2	1	2
3371	244	EIEAENYHDIKR	12	1	1515.73	IPI00005614;IPI00328230;IPI00333015;IPI00977956	IPI00005614	yes	no	4	0.0012536	100.88	1	1	1	1
3746	244	EMIDKWEDR	9	1	1220.55	IPI00005614;IPI00328230;IPI00333015	IPI00005614	yes	no	3	0.20208	66.073	1	2	1	2
3776	244	ENEVIEAWK	9	0	1116.55	IPI00005614;IPI00328230;IPI00333015	IPI00005614	yes	no	2,3	3.7287e-06	135.86		10		10
3916	244	EQWANIEQISAIR	13	0	1556.79	IPI00005614;IPI00328230;IPI00333015	IPI00005614	yes	no	2,3	2.8244e-36	190.37	1	8	1	8
4014	244	ETASEIIMR	9	0	1048.52	IPI00005614;IPI00328230;IPI00333015	IPI00005614	yes	no	2	0.00017951	118.5		4		4
4094	244	EVDDIEQWIAER	12	0	1501.7	IPI00005614;IPI00328230;IPI00333015	IPI00005614	yes	no	2,3	4.9601e-18	169.89	8	8	8	8
4189	244	EVVAGSHEIGQDYEHVTMIQER	22	0	2526.18	IPI00005614;IPI00328230;IPI00333015	IPI00005614	yes	no	4	0.0028512	78.078	1	1	1	1
4322	244	FANSIVGVQQQIQAFNTYR	19	0	2183.11	IPI00005614;IPI00328230;IPI00333015;IPI00977956	IPI00005614	yes	no	3	2.6499e-54	186.72	2	2	2	2
4519	244	FFSMVR	6	0	785.389	IPI00005614;IPI00328230;IPI00333015;IPI00384252;IPI00171635;IPI01012352;IPI00983196;IPI00478167	IPI00005614	yes	no	2	0.045345	98.03	4	6	4	6
4872	244	FMEIIEPINER	11	0	1389.7	IPI00005614;IPI00328230;IPI00333015	IPI00005614	yes	no	2,3	5.339e-05	126.71	7	6	7	6
5047	244	FSIFGK	6	0	697.38	IPI00005614;IPI00026941;IPI00910747;IPI00978336;IPI00955835	IPI00005614	yes	no	2	0.11771	76.805	3	9	3	9
6927	244	HIIGVEDIIQK	11	0	1263.72	IPI00005614;IPI00328230;IPI00333015;IPI00977956	IPI00005614	yes	no	3	1.4647e-07	147.2	2	2	2	2
7105	244	HQAFMAEIASNK	12	0	1345.64	IPI00005614;IPI00328230;IPI00333015	IPI00005614	yes	no	3	0.0017031	96.113		1		1
7120	244	HQIIEQAVEDYAETVHQISK	20	0	2337.16	IPI00005614;IPI00328230;IPI00333015	IPI00005614	yes	no	4	0.12219	65.467		1		1
7386	244	IAEISDVWEEMK	12	0	1448.69	IPI00005614;IPI00328230;IPI00333015	IPI00005614	yes	no	3	2.6637e-06	127.42	3	4	3	4
7710	244	IDDIFER	7	0	906.445	IPI00005614;IPI00328230;IPI00333015	IPI00005614	yes	no	2	0.022182	94.887	2	3	2	3
8970	244	IIEVISGER	9	0	1014.57	IPI00005614;IPI00328230;IPI00333015;IPI00977956	IPI00005614	yes	no	2	9.1781e-06	130.75	3	8	3	8
9137	244	IIIEVHQFSR	10	0	1240.69	IPI00005614;IPI00328230;IPI00333015	IPI00005614	yes	no	3	0.00018634	126.07	3	3	3	3
9372	244	IIQITEK	7	0	843.507	IPI00005614;IPI00328230;IPI00333015	IPI00005614	yes	no	2	0.012783	114.78		2		2
9480	244	IITQHENIKNEIDNYEEDYQK	21	1	2635.24	IPI00005614;IPI00328230;IPI00333015	IPI00005614	yes	no	4	4.3844e-30	145.46		2		2
9837	244	INDGNEYIFQAK	12	0	1410.68	IPI00005614	IPI00005614	yes	yes	3	0.0010606	100.69		3		3
10136	244	IQAIDTGWNEIHK	13	0	1523.77	IPI00005614;IPI00328230;IPI00333015	IPI00005614	yes	no	3	1.3344e-05	126.83	3	6	3	6
10299	244	IQQFIR	6	0	803.465	IPI00005614;IPI00328230;IPI00333015	IPI00005614	no	no	2	0.045345	98.03		2
10669	244	ITDIYTDIR	9	0	1108.58	IPI00005614;IPI00328230;IPI00333015;IPI00977956	IPI00005614	yes	no	2	0.012869	85.676		3		3
10831	244	ITTIEIIEVR	10	0	1185.7	IPI00005614;IPI00328230;IPI00333015	IPI00005614	yes	no	2,3	0.00018634	126.07	5	4	5	4
11086	244	IVSQDNFGFDIPAVEAATK	19	0	2021.01	IPI00005614;IPI00328230;IPI00333015;IPI00977956	IPI00005614	yes	no	3	3.4539e-09	111.22		4		4
11666	244	KFANSIVGVQQQIQAFNTYR	20	1	2311.21	IPI00005614;IPI00328230;IPI00333015;IPI00977956	IPI00005614	yes	no	3,4	5.2682e-88	219.95	3	2	3	2
11843	244	KHEAIETDIAAYEER	15	1	1773.85	IPI00005614;IPI00328230;IPI00333015;IPI00977956	IPI00005614	yes	no	3,4	2.2019e-12	149.69	5	3	5	3
11846	244	KHEWEAHNKK	10	2	1305.66	IPI00005614	IPI00005614	yes	yes	3,4	0.0022847	129.38	4		4
11868	244	KHNIIASK	8	1	909.54	IPI00005614;IPI00328230;IPI00333015	IPI00005614	yes	no	2,3	0.0012971	119.27	3		3
11885	244	KHYASEEIK	9	1	1103.56	IPI00005614;IPI00328230;IPI00333015	IPI00005614	yes	no	3,4	0.052112	69.812	2	2	2	2
12061	244	KIPEEIGR	8	1	940.534	IPI00005614;IPI00328230;IPI00333015	IPI00005614	yes	no	3	0.057949	69.998	1	3	1	3
12279	244	KQAIQDTIAIYK	12	1	1390.78	IPI00005614;IPI00328230;IPI00333015	IPI00005614	yes	no	3	1.9307e-12	153.34	1	1	1	1
12288	244	KQEDFMTTMDANEEK	15	1	1815.77	IPI00005614;IPI00328230;IPI00333015	IPI00005614	yes	no	3	5.3238e-24	169.04		3		3
12333	244	KQQMIENQMEVR	12	1	1532.74	IPI00005614;IPI00328230;IPI00333015	IPI00005614	yes	no	3	0.0014768	99.568	1	3	1	3
13209	244	MWEVIESTTQTK	12	0	1451.7	IPI00005614;IPI00328230;IPI00333015	IPI00005614	yes	no	3	0.00080254	102.52	1	4	1	4
13977	244	QAIQDTIAIYK	11	0	1262.69	IPI00005614;IPI00328230;IPI00333015	IPI00005614	yes	no	3	0.0039333	88.681		4		4
14216	244	QIEAQEKPR	9	1	1097.58	IPI00005614;IPI00328230;IPI00333015	IPI00005614	yes	no	3	0.021337	93.178		5		5
14337	244	QIWGIIIEETEK	12	0	1457.78	IPI00005614;IPI00328230;IPI00333015	IPI00005614	yes	no	3	1.3864e-05	125.74	3		3
14338	244	QIWGIIIEETEKR	13	1	1613.88	IPI00005614;IPI00328230;IPI00333015	IPI00005614	yes	no	3	1.7075e-06	128.08	4	3	4	3
14397	244	QNIISQSHAYQQFIR	15	0	1831.93	IPI00005614;IPI00328230;IPI00333015	IPI00005614	yes	no	3	1.603e-32	176.25	5	3	5	3
15361	244	SGHFEQAIK	9	0	1015.51	IPI00005614;IPI00328230;IPI00333015	IPI00005614	yes	no	3	0.01038	88.948	1	3	1	3
15775	244	SNAHYNIQNAFNIAEQHIGITK	22	0	2482.24	IPI00005614;IPI00328230;IPI00333015;IPI00977956	IPI00005614	yes	no	4	2.8677e-41	156.11	2	2	2	2
16217	244	TAASGIPYHSEVPVSIK	17	0	1754.92	IPI00005614	IPI00005614	yes	yes	3	1.2258e-05	100.54		1		1
17823	244	VIESTQDIGNDIAGVMAIQR	20	0	2129.08	IPI00005614;IPI00328230;IPI00333015	IPI00005614	yes	no	3	3.6079e-73	204.13		4		4
18317	244	VQAVVAVAR	9	0	911.555	IPI00005614;IPI00328230;IPI00333015;IPI00977956	IPI00005614	yes	no	2	0.02182	78.934	1	1	1	1
18843	244	WDVDDWDNENSSAR	14	0	1707.68	IPI00005614;IPI00328230;IPI00977956;IPI00969090	IPI00005614	yes	no	3	1.4181e-06	127.56	1	1	1	1
18950	244	WIHGIESQIQSDDYGK	16	0	1874.88	IPI00005614;IPI00328230;IPI00333015	IPI00005614	yes	no	3	6.3576e-45	188.09	1	1	1	1
6635	245	GYGFVSFYNK	10	0	1180.56	IPI00644708;IPI00005615;IPI00647436;IPI01013673	IPI00644708	yes	no	3	0.003333	94.85	1	4	1	4
7690	245	IDAENAIVHMGGQWIGGR	18	0	1922.94	IPI00644708;IPI00005615;IPI00647436;IPI01013673	IPI00644708	yes	no	3	1.0454e-24	160.04	2	4	2	4
504	246	AGQHSQAVADIQAAIR	16	0	1634.85	IPI00005634;IPI00965004	IPI00005634	yes	no	3	0.033942	96.464		1		1
695	246	AIEYFTCAIQHR	12	0	1507.72	IPI00005634	IPI00005634	yes	yes	3	3.4153e-05	122.69	2		2
1441	246	AVHSNPGDPAIWSIISR	17	0	1818.94	IPI00005634	IPI00005634	yes	yes	3	0.0015204	82.55	1	1	1	1
5005	247	FQQSGQNIFIPQITTK	16	0	1848.97	IPI00005694;IPI00893392	IPI00005694	yes	no	3	0.0012527	86.467	1	5	1	5
8481	247	IGIIPIINPT	10	0	1049.65	IPI00005694	IPI00005694	yes	yes	2	4.1475e-08	150.4	2	8	2	8
8670	247	IHPSYTNYR	9	0	1149.56	IPI00005694;IPI00893392	IPI00005694	yes	no	2,3	0.015454	82.279	4		4
15184	247	SDPVTINIIHGPDIPR	16	0	1742.93	IPI00013685;IPI00647665;IPI00005694;IPI00893392	IPI00013685	no	no	3	1.6248e-19	158.52	2	3
505	248	AGQISQGAAEEDHGCR	16	0	1684.72	IPI00005707	IPI00005707	yes	yes	3	0.00049674	90.725		4		4
1151	248	AQEQHWWIGIHTSESDGR	18	0	2135.98	IPI00005707	IPI00005707	yes	yes	4	0.012467	72.315	2	2	2	2
5368	248	GAWIGMNFNPK	11	0	1233.6	IPI00005707;IPI00902949	IPI00005707	yes	no	3	0.00019362	115.71	1	4	1	4
11435	248	KAGQISQGAAEEDHGCR	17	1	1812.82	IPI00005707	IPI00005707	yes	yes	4	0.06266	63.894	1		1
16611	248	TIGDQISIIIGAR	13	0	1355.78	IPI00005707	IPI00005707	yes	yes	2,3	8.7168e-11	147.26	4	2	4	2
16864	248	TPIWIGIAGEEGSR	14	0	1484.76	IPI00005707	IPI00005707	yes	yes	2	3.7537e-05	120.87		5		5
19065	248	WSDGVGFSYHNFDR	14	0	1685.72	IPI00005707	IPI00005707	yes	yes	3	7.6323e-63	216.06	2	2	2	2
19085	248	WTDGSIINFISWAPGKPR	18	1	2044.05	IPI00005707	IPI00005707	yes	yes	3	1.7357e-49	193.47	2	2	2	2
5216	249	FWPHIK	6	0	826.449	IPI00005711;IPI00940882;IPI00465375;IPI00909242	IPI00005711	yes	no	3	0.065983	89.775	9	6	9	6
12806	249	MGDADYIAAWHR	12	0	1404.62	IPI00005711;IPI00940882;IPI00465375;IPI00939619	IPI00005711	yes	no	3	0.00043449	106.62		1		1
10330	250	IQSTPVK	7	0	771.449	IPI00005719;IPI00917079;IPI00334174;IPI00185217;IPI00937805	IPI00005719	yes	no	2	0.019441	97.798	4	8	4	8
12555	250	KVVDYTTAK	9	1	1023.56	IPI00005719;IPI00917079;IPI00334174	IPI00005719	yes	no	3	1.4335e-05	128.27	1	7	1	7
12826	250	MGPGATAGGAEK	12	0	1045.49	IPI00005719;IPI00917079;IPI00334174;IPI00185217;IPI00937805	IPI00005719	yes	no	2	7.5982e-13	158.05	1	4	1	4
13258	250	NATNVEQSFMTMAAEIK	17	0	1883.88	IPI00005719;IPI00917079;IPI00334174;IPI00185217;IPI00937805	IPI00005719	yes	no	2,3	9.605e-39	181.72	6	9	6	9
18585	250	VVDYTTAK	8	0	895.465	IPI00005719;IPI00917079;IPI00334174	IPI00005719	yes	no	2	0.0045053	103.83	5	7	5	7
8540	251	IGQIYQSWIDK	11	0	1349.7	IPI00005728;IPI01015125;IPI00154352;IPI00647194;IPI00514229	IPI00005728	yes	no	2,3	1.6621e-05	134.75	7	11	7	11
14392	251	QNEEFRPFIR	10	1	1334.67	IPI00005728;IPI01015125;IPI00154352;IPI00647194	IPI00005728	yes	no	2,3	0.00033288	128.81	3	3	3	3
15224	251	SEGDSVGESVHGKPSVVYR	19	1	1987.96	IPI00005728;IPI01015125;IPI00154352;IPI00647194;IPI00514229	IPI00005728	yes	no	4	5.0436e-05	94.487	1	1	1	1
19579	251	YIPFTHGK	8	0	961.502	IPI00005728;IPI01015125	IPI00005728	yes	no	2,3	0.00064122	124.83	7	6	7	6
6278	252	GQNDIMGTAEDFADQFIR	18	0	2026.91	IPI00005737;IPI00399142;IPI00641719;IPI00922295;IPI00922900	IPI00005737	yes	no	2,3	2.7003e-91	230.29	7	6	7	6
7673	252	ICIISTFIEDGIR	13	0	1535.8	IPI00005737;IPI00399142;IPI00641719;IPI01015290;IPI00922295;IPI00922900	IPI00005737	yes	no	2,3	1.3765e-21	171.92	9	3	9	3
13210	252	MWFQWSEQR	9	0	1296.57	IPI00005737;IPI00399142;IPI00641719;IPI01015290;IPI00922295;IPI00922900	IPI00005737	yes	no	2,3	9.3704e-22	186.76	34	30	34	30
14587	252	QYIPHVAR	8	0	982.535	IPI00005737;IPI00399142;IPI00641719;IPI01015290;IPI00922295;IPI00922900	IPI00005737	yes	no	2,3	0.0088585	95.531	3	11	3	11
15745	252	SMFAGVPTMR	10	0	1095.52	IPI00005737;IPI00399142;IPI00641719;IPI01015290	IPI00005737	yes	no	2,3	0.00074865	113.71	2	9	2	9
16177	253	SYETIVDFDNHIDDIR	16	0	1950.9	IPI00005740	IPI00005740	yes	yes	3	3.3853e-26	167.98	2	2	2	2
18104	253	VKDASPNQVAEK	12	1	1284.67	IPI00005740;IPI00915313	IPI00005740	yes	no	3	1.6891e-06	131.17		3		3
1993	254	DHPAINYNIVSGPPSHK	17	0	1844.92	IPI00005745;IPI00259092	IPI00005745	yes	no	4	2.4527e-05	96.464	2	2	2	2
9357	254	IIQEIVDQCMNR	12	0	1517.73	IPI00005745	IPI00005745	yes	yes	3	0.00018152	113.38	1	4	1	4
14729	254	RGDIVFVDR	9	1	1075.58	IPI00005745	IPI00005745	yes	yes	2,3	0.0040458	101.64	2	2	2	2
15327	254	SFVIDHQR	8	0	1000.51	IPI00005745	IPI00005745	yes	yes	3	0.015959	86.833	1		1
18675	254	VVVTVEQTEEEIER	14	0	1658.84	IPI00005745	IPI00005745	yes	yes	2,3	1.8411e-62	210.38	2	9	2	9
6273	255	GQIQEAIEHYR	11	0	1342.66	IPI00005780;IPI00607723;IPI00924555;IPI00924749	IPI00005780	yes	no	3	9.9721e-05	122.69	1	1	1	1
7835	255	IDPSTIQMWANIIK	14	0	1628.86	IPI00005780;IPI00607723;IPI00219856;IPI01008950	IPI00005780	yes	no	3	0.063388	64.224	2		2
10179	255	IQEAIMHYK	9	0	1131.57	IPI00005780;IPI00607723;IPI00219856	IPI00005780	yes	no	3	0.032918	73.985	2	2	2	2
12948	255	MISFQGIAEIAHR	13	0	1471.76	IPI00005780;IPI00924555	IPI00005780	yes	no	3	1.3224e-28	184.34	4	3	4	3
15035	255	RVPNSVIWIIR	11	1	1351.81	IPI00005780;IPI00607723;IPI00219856;IPI01008950	IPI00005780	yes	no	3	0.0073386	83.397	1	2	1	2
18287	255	VPNSVIWIIR	10	0	1195.71	IPI00005780;IPI00607723;IPI00219856;IPI01008950	IPI00005780	yes	no	2,3	0.029846	71.349	7	6	7	6
9634	256	IKEIQNEVEK	10	1	1228.67	IPI00977968;IPI00005792;IPI00414963	IPI00977968	yes	no	3	0.041181	78.939	2	2	2	2
16946	256	TSIAIDESIFR	11	0	1250.65	IPI00977968;IPI00005792;IPI00414963	IPI00977968	yes	no	2,3	2.3349e-05	132.88	1	6	1	6
10001	257	IPFNQAIVFSNIHSR	15	0	1741.93	IPI00005904	IPI00005904	yes	yes	3	3.7499e-06	119.88	2	2	2	2
1494	258	AVSHIVTWQDGR	12	0	1367.69	IPI00005914	IPI00005914	yes	yes	3	0.009009	81.017	1	1	1	1
16945	258	TSHMWFEIPK	10	0	1274.61	IPI00005914	IPI00005914	yes	yes	3	0.010073	80.755	2	2	2	2
4929	259	FNVTGTPEQYVPYSTTR	17	0	1958.94	IPI00005966	IPI00005966	yes	yes	3	0.01229	72.898		3		3
5994	259	GIQQITGHGGIR	12	0	1235.67	IPI00005966	IPI00005966	yes	yes	3	0.0001873	113.22		2		2
11704	259	KFIWTNHK	8	1	1072.58	IPI00005966	IPI00005966	yes	yes	2,3	0.00029105	133.86	4	6	4	6
13733	259	NTFWDVDGSMVPPEWHR	17	0	2071.92	IPI00005966	IPI00005966	yes	yes	3	1.4579e-38	179.79	3	3	3	3
18954	259	WIHSMTDDPPTTKPITAR	18	1	2066.03	IPI00005966;IPI00019331	IPI00005966	yes	no	4	2.5378e-08	107.99	2	2	2	2
2672	260	DVQDSITVSNEAQTAK	16	0	1704.82	IPI00005969	IPI00005969	yes	yes	3	0.0019518	82.529	2		2
2916	260	EASDPQPEEADGGIK	15	0	1541.68	IPI00005969	IPI00005969	yes	yes	2	1.0344e-23	162.46	1	1	1	1
3175	260	EGAAHAFAQYNMDQFTPVK	19	0	2123.97	IPI00005969	IPI00005969	yes	yes	3,4	8.8786e-67	206.43	7	4	7	4
4825	260	FITHAPPGEFNEVFNDVR	18	0	2088.01	IPI00005969	IPI00005969	yes	yes	3,4	2.9166e-75	213.67	7	9	7	9
5113	260	FTITPPTAQVVGVIK	15	0	1569.91	IPI00005969	IPI00005969	yes	yes	2,3	1.0393e-23	162.41	5	12	5	12
1677	261	DAEDAMDAMDGAVIDGR	17	0	1750.71	IPI01009595;IPI00005978;IPI00796848;IPI01011463;IPI00385786	IPI01009595	yes	no	2,3	1.8734e-89	222.16	4	14	4	14
5538	261	GFAFVR	6	0	695.375	IPI01009595;IPI00005978;IPI00796848;IPI01011463;IPI00385786;IPI00477842;IPI00856075;IPI00746575;IPI00902967;IPI00739666	IPI01009595	yes	no	2	0.044502	98.352	2	8	2	8
17393	261	VDNITYR	7	0	879.445	IPI01009595;IPI00005978;IPI00796848;IPI01011463;IPI00385786;IPI00477842;IPI00856075;IPI00746575;IPI00902967;IPI00739666	IPI01009595	yes	no	2	0.05494	77.282		4		4
17618	261	VGDVYIPR	8	0	917.497	IPI01009595;IPI00005978;IPI00796848;IPI01011463;IPI00385786;IPI00477842;IPI00856075;IPI00746575;IPI00902967	IPI01009595	yes	no	2	0.029295	77.923	4	9	4	9
11410	262	KAEATGEK	8	1	832.429	IPI01012084;IPI00005996;IPI00793762;IPI00984997;IPI00759481;IPI00845492;IPI00902434;IPI00759667;IPI01015178;IPI00981203;IPI01011554	IPI01012084	yes	no	3	0.022018	84.476	1	4	1	4
12334	262	KQQQEPTGEPSPK	13	1	1452.72	IPI01012084;IPI00005996;IPI00793762;IPI00984997;IPI00759481;IPI00845492;IPI00902434;IPI00759667;IPI01015178;IPI00981203	IPI01012084	yes	no	3	3.598e-21	169.65	1	4	1	4
12582	262	KWPQQVVQK	9	1	1139.65	IPI01012084;IPI00005996;IPI00793762	IPI01012084	yes	no	3	9.1474e-05	124.23	1	3	1	3
11658	263	KETVESHFR	9	1	1131.57	IPI00006006	IPI00006006	yes	yes	3	0.006376	97.431	1	1	1	1
16599	263	TIFITGIPR	9	0	1016.6	IPI00006006	IPI00006006	yes	yes	2	0.0061373	95.502	1	3	1	3
3634	264	EIWDSIMTR	9	0	1149.55	IPI00006025;IPI00719256	IPI00006025	no	no	2	1.1699e-05	128.38	2	2
5806	264	GIAIWEAYR	9	0	1077.56	IPI00006025;IPI00719256	IPI00006025	no	no	2	0.0001994	117.4	2	1
19662	264	YKPYEEAIIQAEAPR	15	1	1776.9	IPI00006025;IPI00719256	IPI00006025	yes	no	3	9.2e-08	134.21	1	1	1	1
6519	265	GVNTGAVGSYIYDRDPEGK	19	1	1996.95	IPI00921911;IPI00006034	IPI00921911	yes	no	3	5.992e-29	156		2		2
4272	266	EYRPETGSWVFK	12	1	1497.73	IPI00006038;IPI00337397;IPI00953181;IPI00216688;IPI01011651;IPI00337395;IPI00936708;IPI00337396	IPI00006038	yes	no	3	6.8959e-09	146.16	2	1	2	1
7296	266	HYDINQIIEPR	11	0	1396.71	IPI00006038;IPI00337397;IPI00953181;IPI00985139	IPI00006038	yes	no	3	0.0001362	119.53	1	1	1	1
8108	266	IFAIIAGK	8	0	831.522	IPI00006038;IPI00337397;IPI00953181;IPI00216688;IPI01011651;IPI00985139	IPI00006038	yes	no	2	0.0050894	102.72	4	1	4	1
10048	266	IPISASHSSK	10	0	1025.55	IPI00006038;IPI00337397;IPI00953181;IPI00216688;IPI01011651	IPI00006038	yes	no	3	0.10547	59.35		3		3
11302	267	IYIITQMPH	9	0	1114.58	IPI00006050;IPI00978701	IPI00006050	yes	no	2,3	6.1371e-06	133.6	5	11	5	11
8959	268	IIETITQQIQAK	12	0	1384.79	IPI00006052	IPI00006052	yes	yes	2,3	1.817e-12	152.07	2	7	2	7
8781	269	IIASTIVHSVK	11	0	1166.7	IPI00006079;IPI00413671;IPI00413673;IPI00886854;IPI00886987;IPI00977358;IPI00413672;IPI00978390;IPI00976642;IPI00980443;IPI00979099	IPI00006079	yes	no	3	0.055151	65.719	1	1	1	1
12676	269	MAPVPIDDSNRPASITK	17	1	1810.92	IPI00006079;IPI00413671;IPI00413673;IPI00886854;IPI00886987;IPI00977358;IPI00413672;IPI00978390;IPI00976642;IPI00980443;IPI00979099	IPI00006079	yes	no	3	0.13004	65.219	2	2	2	2
19332	269	YFIHDDRDDGVDYWAK	16	1	2013.89	IPI00006079;IPI00413671;IPI00413673;IPI00976726	IPI00006079	yes	no	3	1.9068e-08	120.84	2	1	2	1
11240	271	IYDFNSYWR	9	0	1262.57	IPI00026104;IPI00953993;IPI00006121;IPI00013771;IPI00640469;IPI00976651	IPI00026104	yes	no	2	0.0016802	106.6	3	3	3	3
9862	272	INHGIIYDEEK	11	0	1329.66	IPI00011264;IPI00883722;IPI00006154;IPI00218949	IPI00011264	yes	no	3	8.7012e-05	123.79		1		1
4287	273	FAAQNIHQNIIR	12	0	1423.77	IPI00006164;IPI00917304	IPI00006164	yes	no	3	0.00036521	108.47	1	2	1	2
657	274	AIEDAFIAIDAK	12	0	1275.67	IPI00006167;IPI01015454	IPI00006167	yes	no	3	0.00046274	105.86	2		2
718	274	AIGDHFYK	8	0	949.466	IPI00006167;IPI01015454;IPI00746326	IPI00006167	yes	no	3	0.081844	65.038	1	1	1	1
3347	274	EIAQIAGRPTEDEDEKEK	18	2	2056.99	IPI00006167;IPI01015454	IPI00006167	yes	no	4	0.10453	78.505	1	1	1	1
4060	274	ETPSQENGPTAK	12	0	1257.58	IPI00006167;IPI01015454	IPI00006167	yes	no	2,3	0.00043449	106.62	2	15	2	15
10043	274	IPIPYGFSAMQGWR	14	0	1621.81	IPI00006167	IPI00006167	yes	yes	2,3	1.0133e-40	188.96	10	9	10	9
12300	275	KQEYIEVQR	9	1	1191.62	IPI00006176;IPI01013257	IPI00006176	yes	no	3	0.066785	68.016	1	3	1	3
14521	275	QVEVNVR	7	0	842.461	IPI00006176;IPI01013257;IPI00939822;IPI00916785	IPI00006176	yes	no	2	0.034173	86.794	1	1	1	1
17456	275	VEGHVFPEFK	10	0	1187.6	IPI00006176;IPI01013257;IPI00939822;IPI00916785	IPI00006176	yes	no	3	0.029846	71.349	2	1	2	1
8201	276	IFHTVTTTDDPVIR	14	0	1613.84	IPI00006181;IPI00791086;IPI00789582;IPI00903191	IPI00006181	yes	no	2,3	1.4181e-06	127.56	4	8	4	8
16143	276	SVYSWDIVVQR	11	0	1350.69	IPI00006181;IPI00791086;IPI00789582	IPI00006181	yes	no	3	4.1692e-05	127.76	2	2	2	2
16676	276	TINEWDSR	8	0	1019.47	IPI00006181;IPI00791086;IPI00789582;IPI00879735	IPI00006181	yes	no	2	0.048925	69.812		6		6
16901	276	TQGNVFATDAIIATIMSCTR	20	0	2169.06	IPI00006181;IPI00791086;IPI00789582;IPI00903191	IPI00006181	yes	no	3	0.00029635	89.982	1		1
19696	276	YNFPNPNPFVEDDMDKNEIASVAYR	25	1	2944.33	IPI00006181;IPI00791086;IPI00789582;IPI00879735	IPI00006181	yes	no	3,4	9.8669e-87	186.45	5	4	5	4
4612	277	FHSEDYIDFIQR	12	0	1568.73	IPI00217965;IPI00006187	IPI00217965	yes	no	3	0.0014755	97.734	1	1	1	1
1149	278	AQEIGHSQSAIASAQR	16	0	1652.82	IPI00292771;IPI00006196;IPI01015783	IPI00292771	yes	no	3	6.0673e-09	121.24		4		4
3842	278	EQAAEHYK	8	0	974.446	IPI00292771;IPI00006196;IPI01015783;IPI01012656;IPI01010468	IPI00292771	yes	no	3	0.020041	82.452	1	2	1	2
5529	278	GEVIGDVIQIETIK	14	0	1512.84	IPI00292771;IPI00006196;IPI01010610;IPI01009141	IPI00292771	yes	no	3	0.0035844	87.719		6		6
7741	278	IDFVCSFIQK	10	0	1255.63	IPI00292771;IPI00006196;IPI01012656;IPI01010610;IPI01009141;IPI00030136;IPI01015043;IPI01014511;IPI01012941;IPI01011637;IPI01011140;IPI01012583;IPI01012118;IPI01009985;IPI01009512	IPI00292771	yes	no	3	0.0035665	93.649	3		3
8515	278	IGNSIIR	7	0	771.46	IPI00292771;IPI00006196;IPI01015783;IPI01012656	IPI00292771	yes	no	2	0.036679	85.265		6		6
7461	279	IAIFPIIPK	9	0	1010.65	IPI00006203	IPI00006203	yes	yes	2,3	0.00012282	121.62	4	4	4	4
14825	279	RIPFISAFER	10	1	1234.68	IPI00006203	IPI00006203	yes	yes	3	0.0091388	83.783	4	1	4	1
2892	280	EAKPEDIMDSK	11	1	1261.59	IPI00006211;IPI00216174	IPI00006211	yes	no	3	0.0059696	94.309		3		3
15658	280	SISSSIDDTEVKK	13	1	1407.71	IPI00006211;IPI00216174;IPI00443658;IPI00910004	IPI00006211	yes	no	3	0.00053795	110.08		5		5
17493	280	VEQVISIEPQHEIK	14	0	1647.88	IPI00006211;IPI00748221;IPI00980397	IPI00006211	yes	no	3	1.1517e-10	141.13	1	6	1	6
785	281	AIIQATIR	8	0	884.544	IPI00793201;IPI00006252;IPI00910647;IPI00965185	IPI00793201	yes	no	2	0.011235	91.9	1	3	1	3
5290	281	GAEADQIIEYIK	12	0	1348.69	IPI00793201;IPI00006252;IPI00910647;IPI00965185	IPI00793201	yes	no	2,3	2.07e-43	200.82	1	13	1	13
10703	281	ITFDAFPGEPDKEINPK	17	1	1916.95	IPI00793201;IPI00006252;IPI00910647	IPI00793201	yes	no	3	1.1299e-38	183.96	1	3	1	3
11871	281	KHPDADSIYVEEVDVGEIAPR	21	1	2338.14	IPI00793201;IPI00006252	IPI00793201	yes	no	4	0.067791	59.502		1		1
7843	282	IDRETEEIHHDR	12	1	1548.73	IPI00021570;IPI00640567;IPI00006362	IPI00021570	yes	no	2,3,4	5.3867e-12	152.07	4	3	4	3
9848	282	INEKPQVIADYESGR	15	1	1717.86	IPI00021570;IPI00640567;IPI00006362	IPI00021570	yes	no	3	4.1042e-07	127.56	1	5	1	5
11804	282	KGPTAAQAK	9	1	870.492	IPI00021570;IPI00640567;IPI00006362	IPI00021570	yes	no	3	0.00073796	113.62		5		5
2852	283	EAHEPIAVADAK	12	0	1249.63	IPI00006379	IPI00006379	yes	yes	3	6.2679e-05	118.4		4		4
4979	283	FQDTAEAIAAFTAIMEGK	18	0	1912.92	IPI00006379	IPI00006379	yes	yes	3	7.473e-06	100.43	1		1
8746	283	IIAHAGSIINIAK	13	0	1319.79	IPI00006379	IPI00006379	yes	yes	3	0.0020813	96.113		3		3
12083	283	KIQEVDSIWK	10	1	1244.68	IPI00006379;IPI00917530	IPI00006379	yes	no	3	0.0028337	99.973	2	2	2	2
2872	284	EAIIEYIIHQK	11	0	1355.74	IPI00006408;IPI00910915	IPI00006408	yes	no	3	0.0039333	88.681	3	3	3	3
13090	285	MSAFAFFVQTCR	12	0	1463.67	IPI00006437	IPI00006437	yes	yes	3	0.00029217	123.51		7		7
7800	286	IDKDGIPVSSEAER	14	1	1514.76	IPI00446875;IPI00552115;IPI00644136;IPI00006438;IPI00853517;IPI00942583;IPI00472099;IPI00853202	IPI00446875	yes	no	3	0.00021552	115.57		5		5
14751	286	RGWAFK	6	1	763.413	IPI00446875;IPI00552115;IPI00644136;IPI00006438;IPI00853517;IPI00942583;IPI00383663	IPI00446875	yes	no	3	0.10752	80.999	4	3	4	3
17229	286	VAGNFHFAPGK	11	0	1143.58	IPI00446875;IPI00552115;IPI00644136;IPI00006438;IPI00853517;IPI00942583;IPI00383663	IPI00446875	yes	no	3	0.00044786	109.66	3	7	3	7
8106	287	IFAGIVHVK	9	0	982.596	IPI00006443;IPI00645031;IPI00909277	IPI00006443	yes	no	3	0.073694	65.252		6		6
10358	287	IQYAIISEAWR	11	0	1348.71	IPI00006443;IPI00645031;IPI00909277	IPI00006443	yes	no	3	0.0062103	83	3	1	3	1
1865	288	DFQSGQHVIVR	11	0	1284.66	IPI00006451;IPI01013355;IPI00977991;IPI00794412	IPI00006451	yes	no	3	0.00057583	106.62	1	1	1	1
2050	288	DIEAMDPSIIK	11	0	1230.62	IPI00006451;IPI00985110;IPI00977991	IPI00006451	yes	no	2	0.086538	60.641	1	1	1	1
4625	288	FIAIIR	6	0	731.469	IPI00006451;IPI00985110;IPI01013355	IPI00006451	yes	no	2	0.0060637	139.13	7	10	7	10
7379	288	IAEESNFPFIK	11	0	1293.66	IPI00006451;IPI00985110;IPI01013355	IPI00006451	yes	no	3	0.00048974	108.67		5		5
8186	288	IFGIIVK	7	0	788.516	IPI00006451;IPI00985110;IPI00977991	IPI00006451	yes	no	2,3	0.0059543	137.5	19	17	19	17
8877	288	IIDYVPIGPR	10	0	1141.65	IPI00006451;IPI00985110	IPI00006451	yes	no	2	0.00051982	117.31		3		3
10250	288	IQIIHIHTAR	10	0	1200.71	IPI00006451;IPI00985110;IPI01013355;IPI00977991	IPI00006451	yes	no	2,3	7.3372e-16	167.67	10	12	10	12
11696	288	KFIAIIR	7	1	859.564	IPI00006451;IPI00985110;IPI01013355	IPI00006451	yes	no	2,3	0.097911	69.383	5	5	5	5
11974	288	KIFADAEEEQR	11	1	1334.65	IPI00006451;IPI00985110;IPI01013355;IPI00977991	IPI00006451	yes	no	3	0.00070947	106.4	1	2	1	2
11975	288	KIFDDAYK	8	1	998.507	IPI00006451;IPI00985110;IPI01013355	IPI00006451	yes	no	3	0.025275	81.594	1	2	1	2
12817	288	MGIGGIDKEFSDIFR	15	1	1683.83	IPI00006451;IPI00985110;IPI01013355;IPI00977991	IPI00006451	yes	no	3	1.1309e-07	133.05	3	2	3	2
16863	288	TPIVSVIIEGPPHSGK	16	0	1629.91	IPI00006451;IPI00985110;IPI01013355	IPI00006451	yes	no	3	1.0454e-05	109.44	1		1
33	289	AAEIIAR	7	0	742.434	IPI00646182;IPI00006482;IPI00977640;IPI01011761;IPI00414005;IPI00008161;IPI00872242;REV__IPI00915314;REV__IPI00658151	IPI00646182	yes	no	2	0.020126	97.071		3		3
127	289	AAVPDAVGK	9	0	826.455	IPI00646182;IPI00006482;IPI00977640;IPI01011761;IPI00414005;IPI00788782;IPI00790327;IPI00302840;IPI00647099;IPI00003021;IPI00640401;IPI00647102;IPI01014473;IPI00908591;IPI01014826	IPI00646182	yes	no	2	0.038761	71.379	1		1
2345	289	DKYEPAAVSEQGDKK	15	2	1663.81	IPI00646182;IPI00006482;IPI01011761;IPI00414005	IPI00646182	yes	no	4	0.048012	85.554	1	1	1	1
2378	289	DMTSEQIDDIIK	12	0	1406.66	IPI00646182;IPI00006482;IPI00977640	IPI00646182	yes	no	3	0.00033654	109.24		2		2
8984	289	IIFDNIKK	8	1	989.591	IPI00646182;IPI00006482;IPI00977640;IPI00788782;IPI00790327;IPI00302840;IPI00647099;IPI00008161;IPI00872242;IPI00375339;IPI00003021;IPI00640401;IPI00647102;IPI01014473;IPI00908591;IPI01014826;IPI00218919;IPI00909069	IPI00646182	yes	no	3	0.029001	80.229	1	3	1	3
9743	289	IMESFK	6	0	753.373	IPI00646182;IPI00006482;IPI00977640;IPI01011761;IPI00414005;IPI00788782;IPI00790327;IPI00302840;IPI00647099;IPI00375339;IPI00984044	IPI00646182	yes	no	2	0.053426	94.95		4		4
10496	289	ISIDEIHR	8	0	981.524	IPI00646182;IPI00006482;IPI00977640;IPI01011761;IPI00414005	IPI00646182	yes	no	2,3	0.00084973	122.13	4	4	4	4
17953	289	VIMVTGDHPITAK	13	0	1380.74	IPI00646182;IPI00006482;IPI00977640;IPI01011761;IPI00414005;IPI00788782;IPI00790327;IPI00302840;IPI00647099;IPI00008161;IPI00872242;IPI00375339;IPI00003021;IPI00640401;IPI00647102;IPI01014473;IPI00908591;IPI01014826;IPI00218919	IPI00646182	yes	no	3	0.0020624	96.229		3		3
18970	289	WINDVEDSYGQQWTYEQR	18	0	2316.01	IPI00646182;IPI00006482;IPI00977640;IPI00930085	IPI00646182	yes	no	3	7.3318e-16	131.4		2		2
19452	289	YHTEIVFAR	9	0	1134.58	IPI00646182;IPI00006482;IPI00977640	IPI00646182	yes	no	2,3	7.991e-05	123.98	3	4	3	4
19780	289	YQISIHK	7	0	887.486	IPI00646182;IPI00006482;IPI00977640;IPI01011761;IPI00414005	IPI00646182	yes	no	3	0.051124	78.616	2	4	2	4
5695	290	GGIQEVAEQIEIER	14	0	1569.8	IPI00006552;IPI00791840;IPI00395777	IPI00006552	yes	no	3	0.00071183	127.79		1		1
8172	290	IFFPVIYDVK	10	0	1239.69	IPI00006552;IPI00791840;IPI00395777;IPI00978903;IPI01011746	IPI00006552	yes	no	2,3	0.0035665	93.649	5	4	5	4
9131	291	IIIEGISSTHAHHIR	15	0	1682.92	IPI00022824;IPI00006558;IPI01014107	IPI00022824	yes	no	3,4	7.0643e-17	154.36	4		4
14769	291	RIDIDAAK	8	1	900.503	IPI00022824;IPI00006558;IPI01014107	IPI00022824	yes	no	3	0.025981	81.296	1	2	1	2
16358	291	TEIDAHIENIISK	13	0	1481.77	IPI00022824;IPI00006558	IPI00022824	yes	no	3	5.6663e-16	159.09	2	2	2	2
18286	291	VPITYIEIIN	10	0	1173.66	IPI00022824;IPI00006558;IPI01014107	IPI00022824	yes	no	2	1.019e-07	149.82		3		3
3396	292	EIENYPHFFIDFENAQPTEGER	22	0	2681.2	IPI00006574;IPI00893075;IPI00893895	IPI00006574	yes	no	3	1.908e-95	216.72	2	3	2	3
548	293	AHESVVK	7	0	768.413	IPI00006579;IPI00645361	IPI00006579	yes	no	3	0.048725	79.454		2		2
1295	293	ASWSSISMDEK	11	0	1239.54	IPI00006579;IPI00645361	IPI00006579	yes	no	2,3	3.4111e-85	247.08	4	16	4	16
1994	293	DHPIPEVAHVK	11	0	1240.66	IPI00006579;IPI00645361	IPI00006579	yes	no	2,3,4	3.145e-32	195.27	6	4	6	4
3950	293	ESFAEMNR	8	0	982.418	IPI00006579	IPI00006579	yes	yes	2	0.03923	73.665		6		6
6354	293	GSNEWK	6	0	719.324	IPI00006579	IPI00006579	yes	yes	2	0.048141	96.964		7		7
7324	293	HYVYGPIPQSFDKEWVAK	18	1	2163.08	IPI00006579	IPI00006579	yes	yes	4	3.1855e-05	98.592	3	1	3	1
14648	293	RDHPIPEVAHVK	12	1	1396.76	IPI00006579;IPI00645361	IPI00006579	yes	no	3,4	1.5207e-17	163.78	4	3	4	3
15212	293	SEDFSIPAYMDR	12	0	1429.62	IPI00006579;IPI00645361	IPI00006579	yes	no	2,3	4.9924e-33	186.74	2	14	2	14
18224	293	VNPIQGIASK	10	0	1025.59	IPI00006579	IPI00006579	yes	yes	2,3	2.7974e-11	161.17	10	18	10	18
18846	293	WDYEKNEWK	9	1	1296.58	IPI00006579	IPI00006579	yes	yes	3	0.00049024	119.27	3	3	3	3
2633	294	DVFIAWVASR	10	0	1162.61	IPI00006586;IPI00879111;IPI00878774;IPI00910152	IPI00006586	yes	no	2	0.0013152	106.2	3	3	3	3
7230	295	HVFNMIK	7	0	887.469	IPI00006608;IPI00412681;IPI00412924;IPI00982225;IPI00219187;IPI00914602;IPI00219186;IPI00219185;IPI00412568;IPI00219183;IPI00981582;IPI00394658;IPI01014704	IPI00006608	yes	no	3	0.069393	72.234	2		2
16521	295	THPHFVIPYR	10	0	1265.67	IPI00006608;IPI00412681;IPI00412924;IPI00982225;IPI00219187;IPI00914602;IPI00219186;IPI00219185;IPI00412568;IPI00219183;IPI00981582;IPI00394658;IPI00219182	IPI00006608	yes	no	2,3	0.0020112	101.65	9	7	9	7
19498	295	YIETPGDENEHAHFQK	16	0	1913.85	IPI00006608;IPI00412681;IPI00412924;IPI00982225;IPI00219187;IPI00914602;IPI00219186;IPI00219185;IPI00412568;IPI00219183;IPI00981582;IPI00394658;IPI01014704	IPI00006608	yes	no	4	0.074241	58.831	1	2	1	2
1707	296	DAIEIYKR	8	1	1006.54	IPI00006612;IPI00966434;IPI00470905;IPI00646376;IPI00984337	IPI00006612	yes	no	3	0.047712	73.616	3	2	3	2
5352	297	GASAYFIFIR	10	0	1143.61	IPI00455329;IPI00006644;IPI00384195	IPI00455329	yes	no	2	0.00091854	111.46	3	3	3	3
12290	298	KQEEETAQIK	10	1	1202.61	IPI00465119;IPI00641910;IPI00646639;IPI00006648;IPI00383812;IPI00909744;IPI00982411	IPI00465119	yes	no	3	0.0044557	93.096		6		6
1999	299	DHVVEGEPYAGYDR	14	0	1605.71	IPI00006657	IPI00006657	yes	yes	3	0.0021219	90.793	1		1
4588	300	FGYHIIMVEGR	11	0	1320.66	IPI00006658;IPI00941201;IPI00787581	IPI00006658	yes	no	3	0.00055332	107.15	5	3	5	3
13489	301	NIITSNNIDVK	11	0	1229.66	IPI00924574;IPI00006662	IPI00924574	yes	no	2	3.3318e-05	130.1	2	2	2	2
19153	301	WYEIEK	6	0	866.417	IPI00924574;IPI00006662;IPI00927914;IPI00910432	IPI00924574	no	no	2	0.027275	106.75	3	4
43	302	AAFQIGSPWR	10	0	1131.58	IPI00006663	IPI00006663	yes	yes	2	0.0020112	101.65	2	5	2	5
3058	302	EEIFGPVMQIIK	12	0	1402.75	IPI00006663;IPI00792207	IPI00006663	yes	no	3	0.0094434	80.763	3		3
16450	302	TFVQEDIYDEFVER	14	0	1788.82	IPI00006663;IPI00792207	IPI00006663	yes	no	3	5.9338e-11	145.81	2		2
16683	302	TIPIDGDFFSYTR	13	0	1530.74	IPI00006663;IPI00792207	IPI00006663	yes	no	2,3	4.6836e-21	167.2	6	6	6	6
17216	302	VAEQTPITAIYVANIIK	17	0	1843.05	IPI00006663;IPI00792207	IPI00006663	yes	no	3	5.2818e-15	133.48	2	3	2	3
19934	302	YYAGWADK	8	0	972.434	IPI00006663;IPI00792207;IPI00216805;IPI01011430;IPI01011938;IPI00169288;IPI00241238	IPI00006663	yes	no	2	0.0016413	114.78	1	1	1	1
4112	303	EVEHFIK	7	0	900.471	IPI00006666	IPI00006666	yes	yes	2	0.0058504	137.77	2	2	2	2
8652	303	IHKPPADSGVDIR	13	1	1403.75	IPI00006666	IPI00006666	yes	yes	3,4	0.021768	86.014	4	4	4	4
8841	303	IIDISVFR	8	0	961.56	IPI00006666;IPI00789599;IPI00790189;IPI00793490	IPI00006666	yes	no	2	0.0026016	110.81	7	7	7	7
7581	304	IASFFISR	8	0	939.518	IPI00006702;IPI00787089;IPI00953543;IPI00178047	IPI00006702	yes	no	2	2.2896e-05	157.58	7	13	7	13
9161	304	IIIIESVSGIIQPR	14	0	1536.92	IPI00006702;IPI00787089;IPI00953543;IPI00178047	IPI00006702	yes	no	2,3	1.2132e-50	197.3	7	10	7	10
9322	304	IIPQVINSWSIGR	13	0	1481.84	IPI00006702;IPI00787089;IPI00953543;IPI00178047	IPI00006702	yes	no	2,3	2.3288e-36	191.53	9	16	9	16
13535	304	NISIHGDGPIR	11	0	1177.62	IPI00006702	IPI00006702	yes	yes	3	0.025001	72.006	1	1	1	1
16479	304	TGSAVAPVHPPNR	13	0	1301.68	IPI00006702;IPI00787089;IPI00953543;IPI00178047	IPI00006702	yes	no	3	0.0047796	89.805		2		2
71	305	AAIPDITK	8	0	827.475	IPI00006713	IPI00006713	yes	yes	2	0.01366	89.298		2		2
1373	305	ATVFIAMGK	9	0	936.51	IPI00006713	IPI00006713	yes	yes	2	2.2427e-08	148.52	1	2	1	2
1799	305	DEKPVEAIR	9	1	1055.56	IPI00006713	IPI00006713	yes	yes	2,3	0.01209	100.02	1	4	1	4
4637	305	FIDIAAAK	8	0	847.48	IPI00006713	IPI00006713	yes	yes	2,3	7.2391e-05	143.12	2	7	2	7
5772	305	GHIIIK	6	0	679.438	IPI00006713	IPI00006713	yes	yes	2	0.027627	105.82	1	1	1	1
7491	305	IAIQWHPDNFQNEEEK	16	0	1996.93	IPI00006713	IPI00006713	yes	yes	3	2.8018e-121	245.69	2	3	2	3
7492	305	IAIQWHPDNFQNEEEKK	17	1	2125.02	IPI00006713	IPI00006713	yes	yes	4	0.00069864	89.231	1	2	1	2
7721	305	IDEAEDDFKK	10	1	1208.56	IPI00006713	IPI00006713	yes	yes	3	0.0067642	88.495	3	6	3	6
8953	305	IIESAEEIIR	10	0	1171.64	IPI00006713	IPI00006713	yes	yes	2,3	1.3319e-42	211.45	9	13	9	13
9669	305	IKNDNTEAFYK	11	1	1341.66	IPI00006713	IPI00006713	yes	yes	3	1.3098e-22	179.42	1	3	1	3
10613	305	ISTIYYQIGDHEISISEVR	19	0	2222.12	IPI00006713	IPI00006713	yes	yes	3	4.8085e-66	197.17	3	4	3	4
11671	305	KFDDGEDPIDAESQQGGGGNPFHR	24	1	2572.12	IPI00006713	IPI00006713	yes	yes	4	4.3013e-09	103.71	1		1
8285	306	IFSIPAQPIWNNR	13	0	1554.83	IPI00006715	IPI00006715	yes	yes	2,3	4.0935e-16	159.99	3	5	3	5
11185	306	IWIAAHWDK	9	0	1138.59	IPI00006715;IPI00982810;IPI00980208;IPI00984166;IPI00981513;IPI00903016	IPI00006715	yes	no	3	0.029791	75.38	7	2	7	2
12655	306	MAFRPGVVDIPEENR	15	1	1728.86	IPI00006715;IPI00982810;IPI00980208;IPI00984166;IPI00981513	IPI00006715	yes	no	3	0.01627	79.089	1	1	1	1
735	307	AIGYFAVVTGK	11	0	1124.62	IPI00107753;IPI00107752;IPI00107751;IPI00107750;IPI00107749;IPI00006721;IPI00375150;IPI00375149	IPI00107753	yes	no	2,3	0.00052669	107.79	2	7	2	7
2606	307	DTWHQVYR	8	0	1103.51	IPI00107753;IPI00107752;IPI00107751;IPI00107750;IPI00107749;IPI00006721;IPI00375150;IPI00375149;IPI00852888	IPI00107753	yes	no	2	0.02791	78.516	1	1	1	1
3104	307	EFDITKEEDIAAIR	14	1	1648.83	IPI00107753;IPI00107752;IPI00107751;IPI00107750;IPI00107749;IPI00006721;IPI00375150;IPI00375149	IPI00107753	yes	no	3	0.0028074	94.465	2	1	2	1
3363	307	EIDRNEIFEK	10	1	1291.64	IPI00107753;IPI00107752;IPI00107751;IPI00107750;IPI00107749;IPI00006721;IPI00375150;IPI00375149	IPI00107753	yes	no	3	0.023614	82.749	2	2	2	2
4914	307	FNIETEWK	8	0	1065.51	IPI00107753;IPI00107752;IPI00107751;IPI00107750;IPI00107749;IPI00006721;IPI00375150;IPI00375149	IPI00107753	yes	no	2	0.00032484	130.96	1	1	1	1
5657	307	GFYYYQR	7	0	995.45	IPI00107753;IPI00107752;IPI00107751;IPI00107750;IPI00107749;IPI00006721;IPI00375150;IPI00375149;IPI00852888	IPI00107753	yes	no	2	0.019631	97.596	3	3	3	3
6089	307	GKEHDDIFDK	10	1	1202.56	IPI00107753;IPI00107752;IPI00107751;IPI00107750;IPI00107749;IPI00006721;IPI00375150;IPI00375149	IPI00107753	yes	no	4	0.04121	78.934	1		1
7692	307	IDAFIEAIHQEK	12	0	1412.73	IPI00107753;IPI00107752;IPI00107751;IPI00107750;IPI00107749;IPI00006721;IPI00375150;IPI00375149	IPI00107753	yes	no	3	3.8e-10	150.04	6	6	6	6
7839	307	IDQIQEEIIHTQIK	14	0	1706.92	IPI00107753;IPI00107752;IPI00107751;IPI00107750;IPI00107749;IPI00006721;IPI00375150;IPI00375149	IPI00107753	yes	no	3	3.3829e-05	121.56	1	1	1	1
14742	307	RGFYYYQR	8	1	1151.55	IPI00107753;IPI00107752;IPI00107751;IPI00107750;IPI00107749;IPI00006721;IPI00375150;IPI00375149;IPI00852888	IPI00107753	yes	no	3	0.0068562	101.64	2	2	2	2
16607	307	TIFVITK	7	0	820.506	IPI00107753;IPI00107752;IPI00107751;IPI00107750;IPI00107749;IPI00006721;IPI00375150;IPI00375149	IPI00107753	yes	no	2	0.027172	91.065		4		4
18005	307	VIQHNAIEDR	10	0	1193.62	IPI00107753;IPI00107752;IPI00107751;IPI00107750;IPI00107749;IPI00006721;IPI00375150;IPI00375149	IPI00107753	yes	no	3	0.00012495	127.68	1	4	1	4
18336	307	VQIAEDIKK	9	1	1042.6	IPI00107753;IPI00107752;IPI00107751;IPI00107750;IPI00107749;IPI00006721;IPI00375150;IPI00375149;IPI00852888	IPI00107753	yes	no	3	0.080818	66.299		4		4
18517	307	VTISEGPHHVAIFK	14	0	1533.83	IPI00107753;IPI00107752;IPI00107751;IPI00107750;IPI00107749;IPI00006721;IPI00375150;IPI00375149	IPI00107753	yes	no	4	0.17461	55.04	1	1	1	1
5202	308	FVYVWDTTSR	10	0	1272.61	IPI00006723;IPI00940685;IPI00385642	IPI00006723	yes	no	2	0.00041154	120.15	3	2	3	2
8265	308	IFQGNVHNFEK	11	0	1331.66	IPI00006723;IPI00940685;IPI00385642	IPI00006723	yes	no	3	0.0017465	96.342	2	1	2	1
3006	309	EDSAVFYEIK	10	0	1199.57	IPI00006725;IPI00903057	IPI00006725	yes	no	3	0.0052653	89.247		3		3
8864	309	IIDVIENR	8	0	970.545	IPI00006725;IPI00903057	IPI00006725	yes	no	2	0.040201	73.248		4		4
11502	309	KDEEDEHGDK	10	1	1200.49	IPI00006725;IPI00903057	IPI00006725	yes	no	3	0.12165	60.102	1	1	1	1
13412	309	NIEDYIHR	8	0	1058.51	IPI00006725;IPI00903057	IPI00006725	yes	no	3	0.00081981	122.52	1	1	1	1
5803	310	GIAHIHIHHVIHR	13	0	1538.87	IPI00604647;IPI00219800;IPI00922561;IPI00927016;IPI00219802;IPI00006752;IPI00219799;IPI00639883;IPI00927735;IPI00952975	IPI00604647	yes	no	3	1.1309e-21	172.27	4	1	4	1
7464	311	IAIGSFVEEYNNK	13	0	1482.74	IPI00006754;IPI00910594;IPI00908632	IPI00006754	yes	no	3	7.6049e-22	172.8		3		3
9827	311	IMWIPDTK	8	0	1002.52	IPI00006754;IPI00910594	IPI00006754	yes	no	2	0.0012801	116.54	1	2	1	2
1048	312	ANNISSISK	9	0	932.493	IPI00006865	IPI00006865	yes	yes	2	8.2084e-05	123.86	1	1	1	1
2222	312	DIQQYQSQAK	10	0	1207.58	IPI00006865	IPI00006865	yes	yes	2,3	5.1696e-11	160.18	2	2	2	2
5473	312	GEAISAIDSK	10	0	989.503	IPI00006865	IPI00006865	yes	yes	2	0.0015104	104.22		4		4
9818	312	IMVANIEEVIQR	12	0	1413.77	IPI00006865	IPI00006865	yes	yes	2,3	2.8215e-18	171.62	9	19	9	19
12053	312	KINEQSPTR	9	1	1071.57	IPI00006865	IPI00006865	yes	yes	3	0.004102	101.54	2	6	2	6
13446	312	NIGSINTEIQDVQR	14	0	1585.81	IPI00006865	IPI00006865	yes	yes	2,3	4.6912e-16	153.09	4	6	4	6
17196	312	VADGIPIAASMQEDEQSGR	19	0	1972.92	IPI00006865	IPI00006865	yes	yes	2,3	3.0634e-66	201.3	2	8	2	8
17936	312	VIITMIAR	8	0	915.558	IPI00006865	IPI00006865	yes	yes	2	1.5068e-06	165.11	17	23	17	23
6225	313	GPPDSDFDGGVYHGR	15	0	1574.67	IPI00006937;IPI01011831	IPI00006937	yes	no	3	7.3214e-17	154.07	1	1	1	1
198	314	ADIIYPGHGPVIHNAEAK	18	0	1900.98	IPI00006952	IPI00006952	yes	yes	4	0.0010611	82.529	1	1	1	1
3902	314	EQQIITIFR	9	0	1146.64	IPI00006952	IPI00006952	yes	yes	2	0.0038683	100.48	2	2	2	2
4876	315	FMEPYIFGSR	10	0	1245.59	IPI00006970	IPI00006970	yes	yes	2	0.0020112	101.65	4	3	4	3
7144	315	HSDFFNVK	8	0	992.472	IPI00006970	IPI00006970	yes	yes	3	0.030789	77.282	2	1	2	1
530	316	AGVMAIANIIQIQR	14	0	1496.85	IPI00006980;IPI00792100	IPI00006980	yes	no	2,3	4.92e-147	268.77	7	20	7	20
6713	316	HDDYIVMIK	9	0	1132.56	IPI00006980;IPI00792100	IPI00006980	yes	no	3	0.014901	83.005	3	2	3	2
9081	316	IIHIEEIR	8	0	1021.59	IPI00006980;IPI00792100	IPI00006980	yes	no	2,3	0.0027127	110.35	6	4	6	4
14044	316	QEAIDWIIGIAVR	13	0	1482.82	IPI00006980;IPI00792100	IPI00006980	yes	no	3	1.7752e-15	152.14	1	1	1	1
11167	317	IWEIIK	6	0	800.48	IPI00006987;IPI00923556;IPI00911118;IPI01015228;IPI01016010	IPI00006987	yes	no	2	0.092964	80.377	2	2	2	2
14910	317	RPIIGIVITPTR	12	1	1334.84	IPI00006987;IPI00923556;IPI00911118;IPI01015228;IPI01016010	IPI00006987	yes	no	3	1.5744e-12	155	1	3	1	3
1325	318	ATGHGEHFSAQEIAEQDAFIR	21	0	2313.08	IPI00795429;IPI00006995;IPI00956135	IPI00795429	yes	no	3,4	5.8283e-62	187	3	3	3	3
3652	318	EIYSFIHHQNR	11	0	1442.71	IPI00795429;IPI00006995;IPI00956135;IPI00922894	IPI00795429	yes	no	2,3,4	8.913e-32	192.12	12	13	12	13
5248	318	FYIEEK	6	0	827.407	IPI00795429;IPI00006995;IPI00956135;IPI00922894	IPI00795429	yes	no	2	0.045345	98.03	1	5	1	5
6152	318	GNEEGDSSGFEHVFSGEVK	19	0	2009.86	IPI00795429;IPI00006995;IPI00956135;IPI00922894	IPI00795429	yes	no	3	1.1132e-24	146.3	2	7	2	7
13606	318	NMWFGIYSR	9	0	1172.54	IPI00795429;IPI00006995;IPI00956135;IPI00922894	IPI00795429	yes	no	2	8.1865e-15	172.21	12	11	12	11
17175	318	TYTWDK	6	0	812.37	IPI00795429;IPI00006995;IPI00956135	IPI00795429	yes	no	2	0.054164	94.669		3		3
17316	318	VCQISIGGYPIAVR	14	0	1531.82	IPI00795429;IPI00006995;IPI00956135	IPI00795429	yes	no	2,3	0.0018774	91.307	2	11	2	11
18491	318	VTGFHNWIR	9	0	1128.58	IPI00795429;IPI00006995;IPI00956135;IPI00922894	IPI00795429	yes	no	2,3	2.3143e-11	153.08	22	24	22	24
19412	318	YGSEQEFVDDIK	12	0	1428.64	IPI00795429;IPI00006995;IPI00956135;IPI00922894	IPI00795429	yes	no	2,3	1.4123e-12	154.36	2	11	2	11
9236	319	IIKDFMIQGGDPTGTGR	17	1	1804.91	IPI00007019	IPI00007019	yes	yes	3	0.0024055	87.566	2	1	2	1
14089	319	QFEDEIHPDIK	11	0	1369.65	IPI00007019	IPI00007019	yes	yes	3	0.00057583	106.62	1	3	1	3
17661	319	VGMVETNSQDRPVDDVK	17	1	1887.9	IPI00007019	IPI00007019	yes	yes	3	0.078555	68.168	1	2	1	2
447	320	AGEAGKIEEVMQEIR	15	1	1658.83	IPI00007058;IPI00979820	IPI00007058	yes	no	3	5.3745e-11	139.78	1	1	1	1
704	320	AIFIADGK	8	0	833.465	IPI00007058;IPI00908316;IPI00867659	IPI00007058	yes	no	2	0.00037067	129.4		3		3
1673	320	DADPIIISIR	10	0	1111.62	IPI00007058;IPI00979820	IPI00007058	yes	no	2	0.005335	89.08		4		4
2947	320	EAYVPSK	7	0	792.402	IPI00007058;IPI00979820	IPI00007058	yes	no	2	0.043449	81.297	1	1	1	1
7229	320	HVFGQPVK	8	0	910.502	IPI00007058;IPI00908316;IPI00867659;IPI01013525	IPI00007058	yes	no	2,3	0.080366	65.252	2		2
7957	320	IEEVMQEIR	9	0	1145.58	IPI00007058;IPI00979820	IPI00007058	yes	no	2	6.6338e-06	133.13	2	3	2	3
17644	320	VGIIAWHPTAR	11	0	1219.68	IPI00007058;IPI00908316;IPI00867659;IPI01013525	IPI00007058	yes	no	3	0.00039711	110.87	3	3	3	3
15038	321	RVPVIGSIINIPGIR	15	1	1602.99	IPI00007061;IPI01011741;IPI01011139	IPI00007061	yes	no	2,3,4	1.4396e-56	208.27	13	10	13	10
18310	321	VPVIGSIINIPGIR	14	0	1446.89	IPI00007061;IPI01011741;IPI01011139	IPI00007061	yes	no	2,3	1.8886e-18	162.31	19	22	19	22
1004	322	AMIESIGVPIEK	12	0	1285.7	IPI00007074	IPI00007074	yes	yes	3	0.0095418	80.706	2	6	2	6
1131	322	APWEIIEIR	9	0	1125.62	IPI00007074	IPI00007074	yes	yes	2	0.00013238	121.09	6	6	6	6
1815	322	DFAAEVVHPGDIK	13	0	1396.7	IPI00007074	IPI00007074	yes	yes	3	0.00012165	118.9		3		3
4276	322	EYTIDVYR	8	0	1057.51	IPI00007074	IPI00007074	yes	yes	2	0.091999	63.565		2		2
6280	322	GQPDEEIKPK	10	1	1139.58	IPI00007074	IPI00007074	yes	yes	3	0.024216	82.261		5		5
7242	322	HVIFPIK	7	0	852.522	IPI00007074	IPI00007074	yes	yes	2,3	0.063377	74.335	3	8	3	8
8296	322	IFTFAEK	7	0	854.454	IPI00007074	IPI00007074	yes	yes	2	0.012962	107.43		3		3
11984	322	KIFTFAEK	8	1	982.549	IPI00007074	IPI00007074	yes	yes	3	0.053157	71.692	1		1
17108	322	TVVSGIVQFVPK	12	0	1272.74	IPI00007074	IPI00007074	yes	yes	3	6.3509e-05	118.28	1	3	1	3
17720	322	VHIMNPMVPGITGSK	15	0	1579.82	IPI00007074	IPI00007074	yes	yes	3	3.0986e-05	103.88	1	3	1	3
706	323	AIFIDAIGPPAVTR	14	0	1439.81	IPI00007080	IPI00007080	yes	yes	3	0.00024856	105.03		6		6
5810	323	GIAQEAEEGIFR	12	0	1318.65	IPI00007080	IPI00007080	yes	yes	2	3.3811e-07	134.49		3		3
9383	323	IIQRPPEEPAAHANCHR	17	1	1994.99	IPI00007080	IPI00007080	yes	yes	4	0.02506	76.01	1	1	1	1
14556	323	QVTSAQIWFHTGIDR	15	0	1757.88	IPI00007080	IPI00007080	yes	yes	3	0.00031835	92.65	2	2	2	2
16047	323	STPIMSWPWSPSAIR	15	0	1714.85	IPI00007080	IPI00007080	yes	yes	2,3	1.603e-32	176.25	9	13	9	13
492	324	AGKGEVTFEDVK	12	1	1278.65	IPI00930710;IPI00007084	IPI00930710	yes	no	3	0.0034415	99.973		3		3
1240	324	ASGDSARPVIIQVAESAYR	19	1	1989.03	IPI00930710;IPI00007084;IPI01012502	IPI00930710	yes	no	3	4.5987e-20	130.27	1	4	1	4
2099	324	DIGFFGIYK	9	0	1058.54	IPI00930710;IPI00007084;IPI01012502	IPI00930710	yes	no	2,3	8.1086e-12	159.11	12	11	12	11
2200	324	DIPFSAIYFPCYAHVK	16	0	1926.93	IPI00930710;IPI00007084;IPI01012502	IPI00930710	yes	no	3	8.7062e-35	179.5	2	2	2	2
7531	324	IAPIEEGTIPFNIAEAQR	18	0	1968.03	IPI00930710;IPI00007084;IPI01012502	IPI00930710	yes	no	2,3	1.4377e-61	201.16	3	14	3	14
9886	324	INIPAPNPDHVGGYK	15	0	1590.82	IPI00930710;IPI00007084;IPI01012502	IPI00930710	yes	no	3	2.5369e-06	122.46	2	3	2	3
11551	324	KDVEVTKEEFVIAAQK	16	2	1832.99	IPI00930710;IPI00007084;IPI01012502	IPI00930710	yes	no	4	0.020809	88.075	1	1	1	1
13927	324	PSVSTSK	7	0	704.37	IPI00930710;IPI00007084;IPI01012502	IPI00930710	yes	no	2	0.1707	58.577	1		1
16017	324	STGSFVGEIMYK	12	0	1317.63	IPI00930710;IPI00007084;IPI01012502	IPI00930710	yes	no	3	0.00038911	107.83	1	5	1	5
17046	324	TVEIISGVVDQTK	13	0	1387.76	IPI00930710;IPI00007084	IPI00930710	yes	no	2	1.8376e-15	151.78	2	2	2	2
19573	324	YINIFGESQPNPK	13	0	1505.75	IPI00930710;IPI00007084	IPI00930710	yes	no	3	7.8795e-08	138.63	1	7	1	7
3692	325	EKINIGYIEDIK	12	1	1433.78	IPI00007117;IPI00792070;IPI00791734	IPI00007117	yes	no	3	4.2957e-12	154.15	2	3	2	3
6100	325	GKIPNIIPEGSVDGDTR	17	1	1766.92	IPI00007117;IPI00792070;IPI00791734	IPI00007117	yes	no	3	2.0867e-05	102.28		6		6
6377	325	GSTEDQMAK	9	0	965.412	IPI00007117;IPI00797177;IPI00797920;IPI00789721	IPI00007117	yes	no	2	1.182e-05	128.27		4		4
6387	325	GSYPDAIIQAQAADK	15	0	1546.76	IPI00007117;IPI00797177;IPI00797920;IPI00789721	IPI00007117	yes	no	2	1.7316e-11	140.27	2	2	2	2
7946	325	IEEHYEIR	8	0	1087.53	IPI00007117	IPI00007117	yes	yes	2,3	0.00086045	121.99	5	5	5	5
9876	325	INIGYIEDIK	10	0	1176.64	IPI00007117;IPI00792070;IPI00791734	IPI00007117	yes	no	2,3	9.1693e-07	141.95	4	12	4	12
10778	325	ITNCIIFFGR	10	0	1239.64	IPI00007117	IPI00007117	yes	yes	2	0.00060773	115.57	2	7	2	7
12055	325	KINSWVK	7	1	873.507	IPI00007117;IPI00792070;IPI00791734	IPI00007117	yes	no	3	0.14382	64.836	2	1	2	1
13172	325	MVIVNAVYFK	10	0	1182.65	IPI00007117;IPI00792070;IPI00791734	IPI00007117	yes	no	3	0.00054992	116.52	2	3	2	3
15125	325	SASFREEYIR	10	1	1256.61	IPI00007117;IPI00792070;IPI00791734;IPI00797177	IPI00007117	yes	no	3	0.0059626	101.65	1	1	1	1
15749	325	SMGMEDAFNK	10	0	1128.46	IPI00007117	IPI00007117	yes	yes	2,3	0.00085047	112.36	1	6	1	6
19965	325	YYSSEPQAVDFIECAEEAR	19	0	2262.97	IPI00007117;IPI00792070;IPI00791734	IPI00007117	yes	no	3	2.5323e-95	228.51		4		4
4717	326	FIINDWVK	8	0	1033.56	IPI00007118;IPI00926949	IPI00007118	yes	no	2	0.0034089	107.47	1	1	1	1
12231	326	KPIENIGMTDMFR	13	1	1550.76	IPI00007118;IPI00926949;IPI01014079	IPI00007118	yes	no	3	0.00026643	114.86	2	1	2	1
4866	327	FKPNTPIGMIEVEK	14	1	1601.85	IPI00807339;IPI01011600;IPI00007133;IPI00807728;IPI00411553;IPI00916729;IPI00916919;IPI00788734;IPI00797879;IPI00917376;IPI00917209;IPI00917707	IPI00807339	yes	no	3	3.853e-10	139.89	1	1	1	1
5571	327	GFFSFFQR	8	0	1034.5	IPI00807339;IPI01011600;IPI00007133;IPI00807728;IPI00411553;IPI00916729;IPI00916919	IPI00807339	yes	no	2,3	6.156e-05	147.34	6	4	6	4
15868	327	SQDIPFVSTDIINTIK	16	0	1789.95	IPI00807339;IPI01011600;IPI00007133;IPI00807728;IPI00411553	IPI00807339	yes	no	3	7.9192e-05	93.478		6		6
1972	328	DGYWFIK	7	0	927.449	IPI00220581;IPI00007138;IPI00411461;IPI00654770;IPI00946931	IPI00220581	yes	no	2	0.027211	91.041	2	1	2	1
4375	328	FDEIYHIK	8	0	1063.53	IPI00220581;IPI00007138;IPI00411461;IPI00654770;IPI00946931	IPI00220581	yes	no	3	0.035229	75.38	2	1	2	1
14645	328	RDGYWFIK	8	1	1083.55	IPI00220581;IPI00007138;IPI00411461;IPI00654770;IPI00946931	IPI00220581	yes	no	3	0.097511	65.246	1	2	1	2
19652	329	YKEEIIEK	8	1	1050.56	IPI00007144	IPI00007144	yes	yes	3	0.011465	105.57	1	1	1	1
3518	330	EIMETMHR	8	0	1045.47	IPI00328913;IPI00007155;IPI00794724;IPI00796001;IPI00793978;IPI01012101;IPI00795056;IPI00434742;IPI00798357	IPI00328913	yes	no	3	0.00086045	121.99	1	1	1	1
3961	331	ESIIDISK	8	0	903.491	REV__IPI00167663;IPI00007163	REV__IPI00167663	yes	no	2	0.0046468	103.56	1	2	1	2
13449	332	NIGWGTDQGIGGFGEEPGIK	20	0	2030.97	IPI00007166	IPI00007166	yes	yes	3	1.0037e-21	136.26		4		4
15571	333	SIIPIPHPVRPEDIE	15	1	1710.93	IPI00007174;IPI00375482	IPI00007174	yes	no	3	0.0013115	92.19	1	1	1	1
13553	334	NIVPIIIAPENIVEK	15	0	1660.98	IPI00169267;IPI00007183;IPI01014314;IPI00893779;IPI00894553;IPI00845387;IPI00917944	IPI00169267	yes	no	3	0.00026262	92.856	3		3
137	335	AAYFGIYDTAK	11	0	1218.59	IPI00007188	IPI00007188	yes	yes	2,3	1.1174e-31	190.88	2	7	2	7
1832	335	DFIAGGVAAAISK	13	0	1218.66	IPI00007188	IPI00007188	yes	yes	2,3	1.8273e-63	202.44	3	11	3	11
6397	335	GTDIMYTGTIDCWR	14	0	1687.73	IPI00007188	IPI00007188	yes	yes	2,3	1.1537e-62	214	2	5	2	5
11813	335	KGTDIMYTGTIDCWR	15	1	1815.83	IPI00007188	IPI00007188	yes	yes	2,3	1.8483e-11	141.54	6	7	6	7
14241	335	QIFIGGVDKR	10	1	1131.64	IPI00007188	IPI00007188	yes	yes	2,3	8.3715e-05	132.88	6	10	6	10
2761	336	DYIPIVIGPTAMR	13	0	1444.77	IPI00236556;IPI00007244;IPI00236554	IPI00236556	yes	no	3	0.0064305	87.363	1	1	1	1
5220	336	FWWENEGVFSMQQR	14	0	1842.81	IPI00236556;IPI00007244;IPI00236554	IPI00236556	yes	no	3	2.4713e-15	157.56	2	2	2	2
7520	336	IANVFTNAFR	10	0	1151.61	IPI00236556;IPI00007244;IPI00236554	IPI00236556	yes	no	2	0.0036741	93.096	3	9	3	9
17552	336	VFFASWR	7	0	911.465	IPI00236556;IPI00007244;IPI00236554	IPI00236556	yes	no	2	0.024505	92.692	4	5	4	5
1594	337	AYNMVDIIHSVVDER	15	0	1759.86	IPI00947502;IPI00921904;IPI00946876;IPI00945117;IPI00007247;IPI00946409;IPI00946553;IPI00945130;IPI00945862;IPI00792361;IPI00387103	IPI00947502	yes	no	3	2.6635e-24	170.95	2	2	2	2
1825	337	DFFNYIPISSQDPAPVR	17	0	1964.96	IPI00947502;IPI00921904;IPI00946876;IPI00945117;IPI00007247;IPI00946409;IPI00946553;IPI00945130;IPI00945862;IPI00792361;IPI00387103;IPI00985361	IPI00947502	yes	no	3	8.7451e-13	119.65	1	3	1	3
2601	337	DTSYIFITGPDVVK	14	0	1553.8	IPI00947502;IPI00921904;IPI00946876;IPI00945117;IPI00007247;IPI00946409;IPI00946553;IPI00945130;IPI00945862;IPI00792361;IPI00387103;IPI00985361	IPI00947502	yes	no	3	0.018868	92.247		1		1
5754	337	GHENVEAAQAEYIEK	15	0	1686.78	IPI00947502;IPI00921904;IPI00946876;IPI00945117;IPI00007247;IPI00946409;IPI00946553;IPI00945130;IPI00945862	IPI00947502	yes	no	3	0.00020289	93.348		2		2
11028	337	IVPEIDTIVPIESTK	15	0	1652.92	IPI00947502;IPI00921904;IPI00946876;IPI00945117;IPI00007247;IPI00946409;IPI00946553;IPI00945130;IPI00945862;IPI00792361;IPI00387103	IPI00947502	yes	no	3	3.4451e-06	120.53		4		4
249	338	AEEPGGHAYETPR	13	0	1412.63	IPI00477104;IPI00007248	IPI00477104	yes	no	3	0.00021969	114.86	1	3	1	3
537	338	AGWIFK	6	0	720.396	IPI00477104;IPI00007248	IPI00477104	yes	no	2	0.0091511	136.65	5	11	5	11
18894	338	WFVIVDR	7	0	933.507	IPI00477104;IPI00007248	IPI00477104	yes	no	2	0.01236	117.7	4	5	4	5
19479	338	YIDIEPDTPISPEEIK	16	0	1857.92	IPI00477104;IPI00007248	IPI00477104	yes	no	3	0.065098	80.96		1		1
12256	339	KPQAHIPVHTEK	12	1	1383.76	IPI00007253;IPI00216617	IPI00007253	yes	no	3	0.0017372	98.04	1		1
18885	339	WFIPNTIK	8	0	1017.56	IPI00007253;IPI00216617	IPI00007253	yes	no	2	0.040174	73.26	2	3	2	3
10590	340	ISSAWPGTIR	10	0	1086.58	IPI00007264	IPI00007264	yes	yes	2	0.016574	77.662	2	7	2	7
16762	340	TKDGYVEVSGK	11	1	1181.59	IPI00007264;IPI01014745	IPI00007264	yes	no	3	0.036393	78.655		2		2
17319	340	VCVNVHSFKPEEIMVK	16	1	1914.97	IPI00007264;IPI01014745	IPI00007264	yes	no	4	0.0062938	81.565		1		1
563	341	AHIFPMADDYSDSIITK	17	0	1922.91	IPI00007266;IPI00908524	IPI00007266	yes	no	3	1.8123e-05	98.592	1	1	1	1
5559	342	GFESPSDNSSAMIIQWHEK	19	0	2161.97	IPI00007280;IPI00550234;IPI00640779	IPI00007280	yes	no	3,4	1.0724e-79	211.9	2	2	2	2
17932	342	VIISFK	6	0	705.443	IPI00007280;IPI00550234;IPI00640779;IPI00903330	IPI00007280	yes	no	2	0.026059	109.94	1	6	1	6
11751	343	KGEETEETSSSK	12	1	1310.58	IPI00007306;IPI00646794	IPI00007306	yes	no	3	1.6856e-17	162.68		5		5
17531	343	VFDFAGEEVR	10	0	1167.56	IPI00007306;IPI00646794	IPI00007306	yes	no	2	0.0042945	91.584		1		1
4063	344	ETQNMAWSKPR	11	1	1346.64	IPI00640747;IPI00007309;IPI00787101;IPI00977435;IPI00975878;IPI00939500;IPI00953449	IPI00640747	yes	no	3	0.00015828	126.71	1	3	1	3
19625	344	YIVQDTDEFIIPTGANK	17	0	1922.96	IPI00640747;IPI00007309;IPI00787101;IPI00977435;IPI00975878;IPI00908999;IPI00514314;IPI01012076;IPI00910212;IPI00645653	IPI00640747	yes	no	3	2.6794e-15	136.33	1	4	1	4
8262	345	IFQEWEAHR	9	0	1214.58	IPI00007320;IPI00023205	IPI00007320	yes	no	3	0.00093919	111.46	2	2	2	2
10574	345	ISPISHGNTIAIFFR	15	0	1671.91	IPI00007320	IPI00007320	yes	yes	3	2.6186e-05	104.17	3	3	3	3
15414	345	SHFIWK	6	0	816.428	IPI00007320;IPI00023205	IPI00007320	yes	no	2,3	0.030439	103.71	8	7	8	7
7430	346	IAGVTAISCWIPIR	14	0	1555.85	IPI00007321;IPI00398727;IPI00983098;IPI00984941;IPI00981294	IPI00007321	yes	no	2,3	5.0433e-32	180.24	13	8	13	8
16740	346	TIVNPANVTFK	11	0	1202.67	IPI00007321;IPI00398727;IPI00983098;IPI00984941;IPI00909991;IPI00797535	IPI00007321	yes	no	2	0.00016247	117.25	1	1	1	1
5965	347	GIIVDRPSETK	11	1	1213.67	IPI00007334;IPI00946415;IPI00911038;IPI00215975;IPI00297991	IPI00007334	yes	no	3	0.033596	79.148	1	4	1	4
8804	347	IIDDIFR	7	0	890.486	IPI00007334;IPI00946415;IPI00911038;IPI00215975;IPI00297991	IPI00007334	yes	no	2	0.019626	97.602	5	5	5	5
12257	347	KPSISITTESIK	12	1	1302.74	IPI00007334;IPI00946415;IPI00911038;IPI00215975;IPI00297991	IPI00007334	yes	no	3	7.1965e-05	118.9	2	8	2	8
8826	348	IIDGIIVMR	9	0	1028.61	IPI00007346;IPI00643915;IPI00645020;IPI00981725	IPI00007346	yes	no	2	0.0012971	109.11	4	2	4	2
8133	349	IFDPINIVFPPGGR	14	0	1540.84	IPI00377050;IPI00007347;IPI00885051	IPI00377050	yes	no	2,3	3.3068e-07	133.32	4	7	4	7
3787	350	ENIVEAIIHSPEIIR	15	0	1731.95	IPI00007402;IPI00981775	IPI00007402	yes	no	3	1.3269e-17	160.84	5	6	5	6
13668	350	NPVWYQAITHGINEEQR	17	0	2054	IPI00007402	IPI00007402	yes	yes	3,4	1.8481e-89	222.29	4	3	4	3
13967	350	QAGVIYIK	8	0	890.523	IPI00007402	IPI00007402	yes	yes	2	0.020041	82.452	1	4	1	4
15837	350	SPIVAAMQHFIPVIK	15	0	1649.93	IPI00007402;IPI00981775	IPI00007402	yes	no	3	4.0448e-06	119.25	3		3
18794	350	WAIHIIAR	8	0	978.576	IPI00007402	IPI00007402	yes	yes	2,3	0.0026437	110.63	14	11	14	11
18975	351	WIPAVIAASK	10	0	1054.62	IPI00007404;IPI00479911;IPI00925029;IPI00909500	IPI00007404	yes	no	2	0.0015151	104.2	1	4	1	4
8183	352	IFGGIDMIAEK	11	0	1192.62	IPI00007423;IPI00759824	IPI00007423	yes	no	2,3	9.1235e-08	148.56	10	14	10	14
10062	352	IPNITHINISGNK	13	0	1419.78	IPI00007423;IPI00759824;IPI00647001	IPI00007423	yes	no	3	5.7806e-21	165.63	4	9	4	9
11953	352	KIEISENR	8	1	987.535	IPI00007423;IPI00759824	IPI00007423	yes	no	2,3	0.0037599	108.74	3	8	3	8
1530	353	AWDDFFPGSDR	11	0	1311.55	IPI00007426;IPI00908696;IPI00909717;IPI00945943;IPI00946721	IPI00007426	yes	no	2,3	5.5325e-16	164.97	7	15	7	15
10674	353	ITDYISK	7	0	838.444	IPI00007426;IPI00908696	IPI00007426	yes	no	2	0.013181	104.45	1	2	1	2
12745	353	MEGIGIK	7	0	746.4	IPI00007426;IPI00908696	IPI00007426	yes	no	2	0.014808	102.72	1	8	1	8
15016	353	RTPMGIVIDAIEQQEEGINR	20	1	2268.15	IPI00007426;IPI00908696	IPI00007426	yes	no	3	2.4662e-101	224.59	4	4	4	4
16869	353	TPMGIVIDAIEQQEEGINR	19	0	2112.05	IPI00007426;IPI00908696	IPI00007426	yes	no	2,3,4	6.8476e-112	235.35	13	7	13	7
11234	354	IYAYEPADTAIIIDNMK	17	0	1939.96	IPI00007427;IPI00942032	IPI00007427	yes	no	3	8.0336e-39	182.33	2		2
11069	355	IVRPPVQVYGIEGR	14	1	1581.9	IPI00007611;IPI00878218;IPI00893479	IPI00007611	yes	no	3	8.384e-23	167.2	3	4	3	4
3278	356	EHDYRDEHFDFIQSHIR	17	1	2243.01	IPI00007675;IPI00909015	IPI00007675	yes	no	3	1.6848e-05	102.73	2	1	2	1
5856	356	GIEYIYINVHDEDRDDQTR	19	1	2350.08	IPI00007675;IPI00927867;IPI00796377	IPI00007675	yes	no	4	1.3174e-13	121.13	2	3	2	3
8476	356	IGIIHENFQTIK	12	0	1411.78	IPI00007675;IPI00909015	IPI00007675	yes	no	3	1.2783e-12	155.11	1	1	1	1
6485	357	GVFVQSVIPYFVATK	15	0	1653.91	IPI00007676;IPI00955780	IPI00007676	yes	no	3	5.0429e-12	147.73	4	7	4	7
12261	357	KPTIDKPSPETFVK	14	2	1585.87	IPI00007676;IPI00955780	IPI00007676	yes	no	4	0.017236	96.604	2	2	2	2
13150	357	MTQIVIPGMVER	12	0	1372.72	IPI00007676;IPI00955780;IPI00984097	IPI00007676	yes	no	2	0.0002965	110.31		4		4
16166	357	SYAEEIAK	8	0	909.444	IPI00007676;IPI00788741	IPI00007676	yes	no	2	0.11868	94.114		1		1
632	358	AIDEYYDK	8	0	1015.45	IPI00007682;IPI00946636;IPI01010714	IPI00007682	yes	no	2	7.1134e-05	143.61		3		3
1418	358	AVETTAQSDNK	11	0	1162.55	IPI00007682;IPI00946636;IPI01010714	IPI00007682	yes	no	3	1.0828e-10	152.54		5		5
1860	358	DFPEITMEVDGK	12	0	1379.63	IPI00007682;IPI00946636;IPI01010714	IPI00007682	yes	no	3	3.4657e-09	143.89		4		4
2357	358	DMGYHVSMMADSTSR	15	0	1686.68	IPI00007682;IPI00946636;IPI01010714	IPI00007682	yes	no	3	0.00083577	90.731	1	2	1	2
3304	358	EHMGDIIYK	9	0	1104.53	IPI00007682;IPI00946636;IPI01010714	IPI00007682	yes	no	2,3	7.4733e-12	159.37	2	3	2	3
4359	358	FCPFYK	6	0	860.389	IPI00007682;IPI00946636;IPI01010714	IPI00007682	yes	no	2	0.058137	93.154	4	4	4	4
5116	358	FTMVQVWPVR	10	0	1261.66	IPI00007682;IPI00946636;IPI00946476	IPI00007682	yes	no	2,3	8.6641e-16	166.55	17	30	17	30
6795	358	HFTEFVPIR	9	0	1144.6	IPI00007682;IPI00946636;IPI01010714	IPI00007682	yes	no	3	0.010478	88.819	2	2	2	2
7388	358	IAEMPADSGYPAYIGAR	17	0	1780.85	IPI00007682;IPI00946636;IPI01010714	IPI00007682	yes	no	2,3	2.5896e-18	145	2	12	2	12
7582	358	IASFYER	7	0	884.439	IPI00007682;IPI00946636;IPI01010714	IPI00007682	yes	no	2	0.043207	81.381		4		4
9968	358	IPANHPIITGQR	12	0	1315.74	IPI00007682;IPI00946636	IPI00007682	yes	no	3	0.021902	73.499		7		7
10862	358	ITWSIIR	7	0	887.523	IPI00007682;IPI00946636;IPI01010714	IPI00007682	yes	no	2	0.0047087	151.17	11	16	11	16
15204	358	SDYAQIIEDMQNAFR	15	0	1799.81	IPI00007682;IPI00946636;IPI01010714	IPI00007682	yes	no	2,3	1.9947e-97	239.19	4	5	4	5
17061	358	TVGMISNMIAFYDMAR	16	0	1818.85	IPI00007682;IPI00946636;IPI01010714	IPI00007682	yes	no	2,3	6.5383e-20	160.8	7		7
17076	358	TVISQSISK	9	0	961.544	IPI00007682;IPI00946636	IPI00007682	yes	no	2	0.00019397	117.7	1	4	1	4
17638	358	VGHSEIVGEIIR	12	0	1307.72	IPI00007682;IPI00946636;IPI00946476	IPI00007682	yes	no	2,3	3.9135e-69	226.29	6	10	6	10
18825	358	WDFTPCK	7	0	952.411	IPI00007682;IPI00946636;IPI00946476	IPI00007682	yes	no	2	0.11925	64.757		1		1
459	359	AGGIIYQIDSYAPR	14	0	1522.78	IPI00980491;IPI00007691;IPI00982028;IPI00910488;IPI00978646;IPI00976579;IPI00910760;IPI01008937	IPI00980491	yes	no	3	0.0052167	84.289	1	2	1	2
13646	359	NPFYSIEMPIR	11	0	1365.68	IPI00980491;IPI00007691;IPI00982028;IPI00910488;IPI00978646	IPI00980491	yes	no	2	0.088925	60.255	1	1	1	1
9156	360	IIIIAGVDR	9	0	968.602	IPI01013834;IPI00007694;IPI00412156;IPI00921280	IPI01013834	yes	no	2	2.3813e-08	148.38	3	6	3	6
1700	361	DAGTITGINVIR	12	0	1228.68	IPI00007702	IPI00007702	yes	yes	2	0.0016342	96.604		3		3
6420	361	GTIEPVEK	8	0	871.465	IPI00007702;IPI00902596	IPI00007702	no	no	2	0.009601	94.114	1	3
7805	361	IDKGQIQEIVIVGGSTR	17	1	1812.01	IPI00007702;IPI00902596	IPI00007702	yes	no	3	2.2109e-29	164.2	2	9	2	9
11678	361	KFEDATVQSDMK	12	1	1397.65	IPI00007702	IPI00007702	yes	yes	3	6.0107e-33	186.81	3	9	3	9
12977	361	MKEIAEAYIGGK	12	1	1308.67	IPI00007702	IPI00007702	yes	yes	3	2.0678e-06	129.34	3	3	3	3
13187	361	MVSHIAEEFK	10	0	1189.58	IPI00007702	IPI00007702	yes	yes	2,3	1.6969e-11	161.63	6	5	6	5
13188	361	MVSHIAEEFKR	11	1	1345.68	IPI00007702	IPI00007702	yes	yes	3,4	0.002633	93.111	5	3	5	3
13245	361	NAIESYTYNIK	11	0	1314.65	IPI00007702;IPI00902596	IPI00007702	yes	no	2,3	3.7808e-05	128.85	2	7	2	7
13686	361	NQMAEKDEYEHK	12	1	1520.66	IPI00007702;IPI00902596	IPI00007702	yes	no	3,4	5.1403e-12	152.54	2	3	2	3
16417	361	TFFPEEISSMVITK	14	0	1627.82	IPI00007702	IPI00007702	yes	yes	2,3	8.6329e-63	215.53	11	12	11	12
17737	361	VHSAVITVPAYFNDSQR	17	0	1902.96	IPI00007702	IPI00007702	yes	yes	3	2.7882e-23	156.08	1	2	1	2
6897	362	HIEEIVHVEQGR	12	0	1444.74	IPI00007722;IPI00942246;IPI00215827;IPI00184670;IPI00977596;IPI00215826	IPI00007722	yes	no	4	0.00069975	103.26		1		1
19002	362	WIVQVPR	7	0	896.523	IPI00007722;IPI00942246;IPI00215827;IPI00184670;IPI00977596;IPI00215826	IPI00007722	yes	no	2	0.027302	90.986	1	1	1	1
19317	362	YFAHIIK	7	0	890.501	IPI00007722;IPI00942246;IPI00215827;IPI00184670;IPI00977596;IPI00215826	IPI00007722	yes	no	3	0.13519	62.842	4	6	4	6
9948	363	INVYYNEATGGK	12	0	1327.64	IPI00007752;IPI00930130;IPI00908605	IPI00007752	yes	no	2,3	1.7466e-12	152.47	3	12	3	12
4591	364	FHAIGPIYYR	10	0	1235.65	IPI00007755;IPI01010993	IPI00007755	yes	no	2,3	8.6456e-29	194.44	23	25	23	25
18202	364	VNIAIWDTAGQER	13	0	1471.74	IPI00007755;IPI01010993	IPI00007755	yes	no	2,3	3.2183e-07	136.7		4		4
12682	365	MASNIFGTPEENQASWAK	18	0	1979.9	IPI00384857;IPI00007764;IPI00447316;IPI01016073;IPI00917313	IPI00384857	yes	no	3	1.3991e-05	96.773		3		3
15942	365	SSGGREDIESSGIQR	15	1	1576.74	IPI00384857;IPI00007764;IPI00447316;IPI01016073;IPI00917313	IPI00384857	yes	no	3	5.1974e-05	105.95		5		5
1014	366	AMQDAEVSK	9	0	977.449	IPI00007765;IPI00966238;IPI00922694;IPI00977382	IPI00007765	yes	no	2	4.3877e-05	125.97	7	11	7	11
1155	366	AQFEGIVTDIIR	12	0	1360.74	IPI00007765;IPI00966238;IPI00922694;IPI00977382	IPI00007765	yes	no	2,3	5.1261e-33	186.46	14	28	14	28
1266	366	ASNGDAWVEAHGK	13	0	1340.61	IPI00007765;IPI00966238	IPI00007765	yes	no	3	0.0050327	89.43	1	3	1	3
1697	366	DAGQISGINVIR	12	0	1241.67	IPI00007765;IPI00966238;IPI00922694	IPI00007765	yes	no	2,3	2.1278e-14	162.22	5	14	5	14
1768	366	DDIENMVK	8	0	962.438	IPI00007765;IPI00966238;IPI00922694	IPI00007765	yes	no	2	0.0002682	132.9	2	7	2	7
3250	366	EGSGSSGTGEQKEDQK	16	1	1622.7	IPI00007765;IPI00966238;IPI00922694	IPI00007765	yes	no	3	2.293e-07	111.12		6		6
3251	366	EGSGSSGTGEQKEDQKEEK	19	2	2008.88	IPI00007765;IPI00966238;IPI00922694	IPI00007765	yes	no	3	6.2454e-28	153.24	1	2	1	2
3903	366	EQQIVIQSSGGISK	14	0	1472.78	IPI00007765;IPI00966238;IPI00922694	IPI00007765	yes	no	2	6.1183e-76	222.16	2	2	2	2
4011	366	ETAENYIGHTAK	12	0	1332.63	IPI00007765;IPI00966238;IPI00922694	IPI00007765	yes	no	2,3	1.408e-18	172.76	5	12	5	12
4032	366	ETGVDITK	8	0	861.444	IPI00007765;IPI00966238;IPI00922694	IPI00007765	yes	no	2	0.00034657	130.22	4	7	4	7
6480	366	GVFEVK	6	0	677.375	IPI00007765;IPI00966238;IPI00922694	IPI00007765	yes	no	2	0.025947	110.24	5	11	5	11
8155	366	IFEMAYK	7	0	900.442	IPI00007765;IPI00966238;IPI00922694	IPI00007765	yes	no	2,3	0.010782	123.96	8	13	8	13
9056	366	IIGQFTIIGIPPAPR	15	0	1591.94	IPI00007765;IPI00966238;IPI00922694	IPI00007765	yes	no	2,3	3.8933e-43	191.06	23	35	23	35
9622	366	IKEEISK	7	1	845.486	IPI00007765;IPI00966238;IPI00922694	IPI00007765	yes	no	2	0.037886	114.93		4		4
10951	366	IVGMPAK	7	0	714.41	IPI00007765;IPI00966238;IPI00966795	IPI00007765	yes	no	2	0.011355	121.68	8	10	8	10
11354	366	IYSPSQIGAFVIMK	14	0	1552.83	IPI00007765;IPI00966238	IPI00007765	yes	no	2,3	3.1601e-51	205.61	29	37	29	37
11543	366	KDSETGENIR	10	1	1147.55	IPI00007765;IPI00966238;IPI00922694	IPI00007765	yes	no	2,3	1.8205e-22	174.98	2	11	2	11
12737	366	MEEFKDQIPADECNK	15	1	1852.8	IPI00007765;IPI00966238;IPI00922694	IPI00007765	yes	no	3	3.9438e-32	177.81	2	6	2	6
12981	366	MKETAENYIGHTAK	14	1	1591.77	IPI00007765;IPI00966238;IPI00922694	IPI00007765	yes	no	3	2.8988e-40	189.24	4	3	4	3
13261	366	NAVITVPAYFNDSQR	15	0	1693.84	IPI00007765;IPI00966238;IPI00922694	IPI00007765	yes	no	2,3	7.0959e-08	127.71	2	6	2	6
13948	366	QAASSIQQASIK	12	0	1230.66	IPI00007765;IPI00966238;IPI00922694	IPI00007765	yes	no	2,3	2.8581e-44	207.47	1	2	1	2
14011	366	QAVTNPNNTFYATK	14	0	1567.76	IPI00007765;IPI00966238;IPI00966795	IPI00007765	yes	no	2,3	7.2575e-76	220.4	2	8	2	8
15050	366	RYDDPEVQK	9	1	1148.55	IPI00007765;IPI00966238	IPI00007765	yes	no	2,3	0.00013489	122.26	4	10	4	10
15175	366	SDIGEVIIVGGMTR	14	0	1445.75	IPI00007765;IPI00966238;IPI00922694;IPI00977382	IPI00007765	yes	no	2,3	1.1119e-16	160.15	1	9	1	9
16041	366	STNGDTFIGGEDFDQAIIR	19	0	2054.95	IPI00007765;IPI00966238;IPI00922694	IPI00007765	yes	no	3	5.024e-21	136.34		5		5
16548	366	TIAPCQK	7	0	816.416	IPI00007765;IPI00966238;IPI00922694;IPI00977382	IPI00007765	yes	no	2	0.022634	94.407		4		4
17014	366	TTPSVVAFTADGER	14	0	1449.71	IPI00007765;IPI00966238;IPI00966795	IPI00007765	yes	no	2,3	9.7779e-41	189.24	5	5	5	5
17424	366	VEAVNMAEGIIHDTETK	17	0	1855.9	IPI00007765;IPI00966238;IPI00922694	IPI00007765	yes	no	3	1.1442e-89	225.85	2	6	2	6
17815	366	VIENAEGAR	9	0	957.488	IPI00007765;IPI00966238;IPI00966795	IPI00007765	yes	no	2	0.0094648	90.15		5		5
17960	366	VINEPTAAAIAYGIDK	16	0	1644.87	IPI00007765;IPI00966238	IPI00007765	yes	no	2,3	3.5843e-71	216.71	5	14	5	14
17961	366	VINEPTAAAIAYGIDKSEDK	20	1	2104.07	IPI00007765;IPI00966238	IPI00007765	yes	no	3,4	1.8801e-51	183.31	4	15	4	15
18354	366	VQQTVQDIFGR	11	0	1289.67	IPI00007765;IPI00966238;IPI00922694	IPI00007765	yes	no	2,3	5.1526e-11	157.68	3	11	3	11
12438	367	KTSCEFTGDIIR	12	1	1425.69	IPI00007812;IPI00848320;IPI00979664	IPI00007812	yes	no	3	0.031883	70.942	1	2	1	2
14835	367	RIPQSTISEFYPR	13	1	1592.83	IPI00007812;IPI00848320;IPI01015994;IPI01013860	IPI00007812	yes	no	3	9.6797e-21	162.49	1	2	1	2
804	368	AIKPPHVIIVHGEQNEMAR	19	1	2138.14	IPI00007818;IPI00946752	IPI00007818	yes	no	5	0.053663	68.944	1	2	1	2
4241	368	EYEDNDEVHIEVHNPR	16	0	1993.88	IPI00007818;IPI00946752;IPI00807384	IPI00007818	yes	no	4	0.19353	72.681		1		1
5951	368	GIIPVFAIGR	10	0	1041.63	IPI00007818;IPI00946752;IPI00807384	IPI00007818	yes	no	2	2.0651e-10	153.71	3	8	3	8
18965	368	WIISDYVK	8	0	1022.54	IPI00007818;IPI00946752;IPI00807384	IPI00007818	yes	no	2	0.00069941	124.08	1	2	1	2
6136	369	GMQIMHANAQR	11	0	1255.59	IPI00007853	IPI00007853	yes	yes	2,3	1.1161e-50	211.78	10	19	10	19
19451	370	YHSVCHIYFR	10	0	1380.64	IPI00007866;IPI00917496;IPI00916958	IPI00007866	yes	no	4	0.0028311	97.431	1		1
12929	371	MIPGPIMMYQFQR	13	0	1610.78	IPI00007913;IPI00216360;IPI00953710;IPI00892802;IPI00903169;IPI01013429	IPI00007913	yes	no	2,3	2.0772e-36	192.12	7	8	7	8
8791	372	IICIFR	6	0	820.463	IPI00967902;IPI00007926;IPI00395835	IPI00967902	yes	no	2	0.025873	110.43	3	2	3	2
8792	372	IICIFRPQSGR	11	1	1345.73	IPI00967902;IPI00007926;IPI00395835	IPI00967902	yes	no	3	0.0045189	98.033	4	4	4	4
224	373	ADWWTNTAHYNR	12	0	1533.67	IPI00007928	IPI00007928	yes	yes	2,3	1.6021e-43	202.56	2	3	2	3
867	373	AISAANIHIR	10	0	1064.61	IPI00007928	IPI00007928	yes	yes	3	9.2649e-05	130.66	1	3	1	3
1430	373	AVFWDIK	7	0	877.47	IPI00007928	IPI00007928	yes	yes	2	0.012833	112.75	3	5	3	5
3061	373	EEIGIIEQAYDNPHEAISR	19	0	2183.05	IPI00007928	IPI00007928	yes	yes	3	8.6363e-113	242.19	2		2
4535	373	FGDIIIK	7	0	804.475	IPI00007928;IPI01010344	IPI00007928	yes	no	2	0.019626	97.602	1	3	1	3
5067	373	FSPIPFPPISYK	12	0	1391.75	IPI00007928	IPI00007928	yes	yes	3	0.0014643	97.813	8	4	8	4
6647	373	GYIPSHYER	9	0	1120.53	IPI00007928	IPI00007928	yes	yes	3	7.0827e-08	143.61	2	2	2	2
7794	373	IDITIINR	8	0	956.565	IPI00007928	IPI00007928	yes	yes	2	0.093007	63.419	2	3	2	3
8256	373	IFPPWIK	7	0	899.527	IPI00007928	IPI00007928	yes	yes	2,3	0.0416	82.263	1	3	1	3
8941	373	IIENMPMPWEQIR	13	0	1655.82	IPI00007928	IPI00007928	yes	yes	3	0.0021848	95.477	2	2	2	2
9157	373	IIIIAIER	8	0	939.612	IPI00007928	IPI00007928	yes	yes	2	0.021422	81.297	5	5	5	5
9168	373	IIIIIR	6	0	739.532	IPI00007928;IPI00293274;IPI00874155;IPI00239117;IPI00297241;IPI00966599;IPI00856073;IPI00002957;IPI00954884;IPI00007093;IPI00215913;REV__IPI00215913;IPI00413147;REV__IPI00413147;IPI00418438;REV__IPI00418438;IPI00941380;REV__IPI00941380;IPI00952568;REV__IPI00952568;IPI00480172;REV__IPI00480172;IPI00719421;REV__IPI00719421;IPI00414275;REV__IPI00414275;IPI00915317;REV__IPI00915317;IPI00935789;REV__I…	IPI00007928	yes	no	2	0.026421	108.99	5	3	5	3
9504	373	IIVDHNIADYMTAK	14	0	1602.81	IPI00007928	IPI00007928	yes	yes	3	2.9159e-05	122.42	3	2	3	2
10509	373	ISIIQIFR	8	0	988.607	IPI00007928;IPI01010344	IPI00007928	yes	no	2	0.01611	86.67	8	5	8	5
10739	373	ITIEDIEDSWDR	12	0	1490.69	IPI00007928	IPI00007928	yes	yes	2	6.4406e-25	181.68	2	2	2	2
11198	373	IWNINNYR	8	0	1091.55	IPI00007928	IPI00007928	yes	yes	2	0.00084973	122.13	4	6	4	6
14162	373	QGYNMINIIIHR	12	0	1470.78	IPI00007928	IPI00007928	yes	yes	2,3	2.3666e-55	211.64	12	10	12	10
14402	373	QNPFWWTHQR	10	0	1398.66	IPI00007928	IPI00007928	yes	yes	2,3	2.7974e-11	161.17	16	18	16	18
14489	373	QTDVGITHFR	10	0	1172.59	IPI00007928	IPI00007928	yes	yes	3	0.0055359	88.596	2	1	2	1
14850	373	RITIEDIEDSWDR	13	1	1646.79	IPI00007928	IPI00007928	yes	yes	3	1.5147e-06	129.34	1	1	1	1
16335	373	TEDPDIPAFYFDPIINPISHR	21	0	2456.2	IPI00007928	IPI00007928	yes	yes	3	3.1441e-74	205.98	4	3	4	3
16656	373	TIIQHISEAWR	11	0	1352.72	IPI00007928	IPI00007928	yes	yes	3	0.00083804	103.26	5	6	5	6
16816	373	TNHIYVSSDDIK	12	0	1390.67	IPI00007928	IPI00007928	yes	yes	3	0.04771	108.7		1		1
16972	373	TSYEEFTHK	9	0	1140.51	IPI00007928	IPI00007928	yes	yes	3	0.039111	71.223	1	1	1	1
18684	373	VWAEYAIK	8	0	978.517	IPI00007928	IPI00007928	yes	yes	2	0.0074068	98.299	1	1	1	1
18946	373	WIGNIIAR	8	0	941.545	IPI00007928	IPI00007928	yes	yes	2	0.034392	75.738	1	3	1	3
19589	373	YIQPWESEFIDSQR	14	0	1796.84	IPI00007928	IPI00007928	yes	yes	3	0.00015232	110.8	2	2	2	2
19681	373	YMPHAVIK	8	0	957.511	IPI00007928	IPI00007928	yes	yes	3	0.018372	84.244	1	2	1	2
19974	373	YYVINAIK	8	0	982.549	IPI00007928	IPI00007928	yes	yes	2	0.030764	113.89	1		1
1220	374	ASAAPKPEPVPVQK	14	1	1417.79	IPI00007935;IPI00966603;IPI00553102;IPI00966347;IPI00942043;IPI00964290;IPI00103146;IPI01013659;IPI00981155;IPI00965261	IPI00007935	yes	no	3	1.0681e-06	132.79		5		5
1857	374	DFNMPITISSIK	12	0	1364.7	IPI00007935;IPI00966603;IPI00553102;IPI00966347;IPI00942043;IPI00964290;IPI00103146;IPI01013659	IPI00007935	yes	no	2,3	1.0139e-81	240.6		10		10
4194	374	EVVKPVPITSPAVSK	15	1	1549.91	IPI00007935	IPI00007935	yes	yes	3	1.9554e-23	166.6	2	7	2	7
6204	374	GPFIVAIGK	9	0	900.543	IPI00007935;IPI00966603;IPI00553102;IPI00966347;IPI00973432;IPI00555593	IPI00007935	yes	no	2	0.00040857	114.93	1	5	1	5
8774	374	IIAQITGTEHIK	12	0	1322.76	IPI00007935;IPI00966603;IPI00553102;IPI00966347;IPI00973432;IPI00555593;IPI00942043;IPI00964290;IPI00103146;IPI01013659;IPI00981155	IPI00007935	yes	no	3	0.006501	84.687	1	1	1	1
8892	374	IIEDTEDWRPR	11	1	1428.7	IPI00007935;IPI00966603;IPI00553102;IPI00966347;IPI00973432;IPI00555593;IPI00942043;IPI00964290;IPI00103146;IPI01013659;IPI00981155	IPI00007935	yes	no	2,3	0.013351	87.258	4	2	4	2
15850	374	SPSWQRPNQGVPSTGR	16	1	1752.87	IPI00007935;IPI00966603;IPI00553102;IPI00966347;IPI00973432;IPI00555593	IPI00007935	yes	no	3	0.10317	66.004	1	2	1	2
19845	374	YTEFYHVPTHSDASK	15	0	1780.81	IPI00007935;IPI00966603;IPI00553102;IPI00966347;IPI00973432;IPI00555593;IPI00942043;IPI00964290;IPI00103146;IPI01013659;IPI00981155	IPI00007935	yes	no	4	2.5684e-06	122.39	1	1	1	1
157	375	ADAEYYAAHK	10	0	1137.51	IPI00007940;IPI00936931;IPI00879747	IPI00007940	yes	no	2,3	5.0927e-07	145.89	3	5	3	5
1447	375	AVIEAEK	7	0	758.417	IPI00007940;IPI00936931;IPI00879747	IPI00007940	yes	no	2	6.5644e-07	108.24	2	1	2	1
2188	375	DINIMAPGITIQAVR	15	0	1610.88	IPI00007940;IPI00936931;IPI00879747	IPI00007940	yes	no	2,3	3.747e-12	148.52	2	10	2	10
2864	375	EAIEPSGENVIQNK	14	0	1526.76	IPI00007940	IPI00007940	yes	yes	2	2.7994e-05	122.64	2	2	2	2
3986	375	ESSIPSK	7	0	746.381	IPI00007940	IPI00007940	yes	yes	2	0.024124	92.925	1		1
8093	375	IEVVNMIAPYAVFDIVR	17	0	1948.05	IPI00007940;IPI00936931;IPI00879747	IPI00007940	yes	no	2,3	1.858e-23	158.17	1	2	1	2
10790	375	ITPEYIEIK	9	0	1104.61	IPI00007940;IPI00936931	IPI00007940	yes	no	2,3	1.0237e-06	138.4	2	14	2	14
10791	375	ITPEYIEIKK	10	1	1232.7	IPI00007940;IPI00936931	IPI00007940	yes	no	3	0.00095649	113.18	2	1	2	1
12635	375	KYQAIASNSK	10	1	1108.59	IPI00007940;IPI00936931	IPI00007940	yes	no	3	1.0023e-06	142.83	1	3	1	3
13329	375	NFEIMEAEK	9	0	1109.51	IPI00007940;IPI00936931;IPI00879747	IPI00007940	yes	no	2,3	7.0122e-06	132.78	1	8	1	8
4255	376	EYIEIEK	7	0	922.465	IPI00007941	IPI00007941	yes	yes	2	0.011808	119.89		4		4
7282	376	HWKPYYK	7	1	1020.52	IPI00007941	IPI00007941	yes	yes	2,3	0.03815	111.28	6	8	6	8
19453	376	YHTESIQNMSK	11	0	1336.61	IPI00007941	IPI00007941	yes	yes	3	0.00083804	103.26	1	4	1	4
14445	377	QQQIEQEQFHAFEEMIR	17	0	2190.02	IPI00007943;IPI00917973;IPI01015782	IPI00007943	yes	no	3	1.8502e-48	185.67	2	1	2	1
15392	377	SGVEIIR	7	0	772.444	IPI00007943;IPI00917973;IPI01015782;IPI00917136;IPI00916971	IPI00007943	yes	no	2	0.034055	86.866		2		2
18795	379	WAIIEEFTK	9	0	1135.59	IPI00656136;IPI00007979	IPI00656136	yes	no	2	6.5265e-06	133.23	3	3	3	3
16620	380	TIGVDFIER	9	0	1048.56	IPI00008034	IPI00008034	yes	yes	2	0.064468	66.621		2		2
18568	380	VVAEVGDIPTVIVQNK	16	0	1679.95	IPI00008034	IPI00008034	yes	yes	3	0.013272	69.92	1	1	1	1
416	381	AFVEAQNK	8	0	905.461	IPI00008164	IPI00008164	yes	yes	3	0.0022722	112.17	2	3	2	3
3531	381	EIPDVIER	8	0	969.513	IPI00008164	IPI00008164	yes	yes	2	0.038608	73.931		2		2
5024	381	FSCMAWTHDGK	11	0	1338.55	IPI00008164	IPI00008164	yes	yes	3	0.07627	62.303	1	1	1	1
5679	381	GGGEYGETWHK	11	0	1219.53	IPI00008164	IPI00008164	yes	yes	3	0.028647	70.1	1	1	1	1
9986	381	IPEADDIQYPSMIIITADHDDR	22	0	2527.19	IPI00008164	IPI00008164	yes	yes	3	1.4207e-41	159.26	2	2	2	2
10055	381	IPMFIVHK	8	0	983.563	IPI00008164	IPI00008164	yes	yes	2,3	0.0080526	97.068	8	13	8	13
10851	381	ITVPFIEQCPIR	12	0	1471.79	IPI00008164	IPI00008164	yes	yes	3	0.067542	107.06		1		1
13484	381	NIIQIHDITTGAIIK	15	0	1648.95	IPI00008164	IPI00008164	yes	yes	3	2.5426e-06	122.45	1	1	1	1
14167	381	QHFEWIVK	8	0	1085.57	IPI00008164	IPI00008164	yes	yes	3	0.002546	111.04	3	4	3	4
15170	381	SDGTETSTNIHQK	13	0	1416.65	IPI00008164	IPI00008164	yes	yes	3	8.7246e-11	147.26		4		4
16434	381	TFPIDVGSIVGYSGQK	16	0	1666.86	IPI00008164	IPI00008164	yes	yes	3	2.8384e-19	155.66		3		3
17567	381	VFIDPNIISDDGTVAIR	17	0	1843.97	IPI00008164	IPI00008164	yes	yes	2,3	6.2371e-15	132.44		9		9
17962	381	VINIDFRDPEESK	13	1	1560.78	IPI00008164	IPI00008164	yes	yes	3	0.021567	86.114	1	1	1	1
19361	381	YFYFYNTGIQNQR	13	0	1712.79	IPI00008164	IPI00008164	yes	yes	3	3.0601e-21	169.52	1	3	1	3
2474	382	DQIPSPGIMVFPK	13	0	1427.75	IPI00008167;IPI00787965;IPI00793333	IPI00008167	yes	no	3	0.0010047	102.73		1		1
8235	382	IFIYNPTTGEFIGR	14	0	1626.84	IPI00008167;IPI00945216;IPI00945384	IPI00008167	yes	no	2,3	5.9054e-32	179.35	9	12	9	12
9043	382	IIGIKPEGVPR	11	1	1177.72	IPI00008167;IPI00787965;IPI00946024	IPI00008167	yes	no	3	0.054242	75.509	1	4	1	4
15183	382	SDPTSYAGYIEDIKK	15	1	1685.81	IPI00008167;IPI00787965;IPI00793333	IPI00008167	yes	no	3,4	4.6469e-17	158.01	4	9	4	9
15610	382	SINQSIAEWK	10	0	1174.6	IPI00008167;IPI00945216;IPI00945384	IPI00008167	yes	no	3	0.0024684	107.79		3		3
19346	382	YFPYYGK	7	0	936.438	IPI00008167	IPI00008167	yes	yes	2,3	0.010096	126.68	5	6	5	6
5027	383	FSDIIFHPWK	10	0	1288.66	IPI00008177;IPI00939399;IPI00845280;IPI00982664;IPI00432073	IPI00008177	yes	no	3	0.15745	55.567	8	7	8	7
11244	383	IYDIIFTNSPFQR	13	0	1612.82	IPI00008177;IPI00939399;IPI00845280;IPI00982664;IPI00432073	IPI00008177	yes	no	2,3	1.4479e-28	184.24	9	8	9	8
17161	383	TYMMMFR	7	0	978.413	IPI00008177;IPI00939399;IPI00845280;IPI00982664	IPI00008177	yes	no	2	0.073175	70.912	5	4	5	4
212	384	ADSYYEYIIK	10	0	1263.6	IPI00008207;IPI00383856;IPI01014739;IPI00924917;IPI01009176	IPI00008207	yes	no	2,3	1.9766e-08	150.61	3	4	3	4
2329	384	DKMESFFIGETIK	13	1	1543.76	IPI00008207;IPI00924917;IPI00556490	IPI00008207	yes	no	3	2.9985e-07	138.45		3		3
6226	384	GPPHIQIRPPSQDIK	15	1	1681.93	IPI00008207;IPI00383856;IPI01014739;IPI00470859;IPI00854698;IPI01012245;IPI01011816	IPI00008207	yes	no	4	0.0061683	86.114	1	1	1	1
10123	384	IPYSDVNIGTGVAHPPR	17	0	1791.93	IPI00008207;IPI00383856;IPI01014739;IPI00470859;IPI00854698	IPI00008207	yes	no	3	0.0017481	81.448	1	2	1	2
10714	384	ITFVGEIAHGR	11	0	1198.65	IPI00008207;IPI00383856;IPI01014739;IPI00924917;IPI01009176	IPI00008207	yes	no	3	0.00067146	104.52	3	3	3	3
12204	385	KPAPVPAEPFDNTTYK	16	1	1773.89	IPI00008214;IPI00916085	IPI00008214	yes	no	3	7.1281e-57	199.13	1	6	1	6
1420	386	AVEYIIMGIPGDR	13	0	1432.74	IPI00008223;IPI00642549;IPI01009205	IPI00008223	yes	no	2,3	3.4905e-11	149.38	9	19	9	19
1687	386	DAFPVAGQK	9	0	931.476	IPI00008223;IPI00642549;IPI00643078;IPI00008219	IPI00008223	yes	no	2	0.013677	84.615	1	1	1	1
3912	386	EQVIAAIR	8	0	898.524	IPI00008223;IPI00642549;IPI01009205;IPI00479614	IPI00008223	yes	no	2	0.013894	89.047		1		1
6078	386	GKDAFPVAGQK	11	1	1116.59	IPI00008223;IPI00642549;IPI00643078	IPI00008223	yes	no	3	0.0007376	114.4	1	4	1	4
7764	386	IDIDPEETVK	10	0	1157.58	IPI00008223;IPI00642549	IPI00008223	yes	no	2	0.00017698	126.31	2	2	2	2
9263	386	IINDDTAIK	9	0	1001.54	IPI00008223;IPI00642549;IPI00643078	IPI00008223	yes	no	2	0.00040306	114.97		2		2
9554	386	IIYAGK	6	0	663.396	IPI00008223;IPI00642549;IPI00643078;IPI00008219	IPI00008223	yes	no	2	0.029594	104.03	1	5	1	5
14066	386	QEKPAEKPAETPVATSPTATDSTSGDSSR	29	2	2944.39	IPI00008223;IPI00642549;IPI01009205;IPI00479614	IPI00008223	yes	no	4	3.6567e-13	99.454		5		5
14278	386	QIIQQNPSIIPAIIQQIGR	19	0	2129.23	IPI00008223;IPI00642549;IPI01009205	IPI00008223	yes	no	2,3	1.5848e-95	229.68	5	12	5	12
16704	386	TIQQQTFK	8	0	992.529	IPI00008223;IPI00642549;IPI00008219	IPI00008223	yes	no	2	1.8736e-06	162.97	2	6	2	6
204	387	ADKNEVAAEVAK	12	1	1243.64	IPI00008240	IPI00008240	yes	yes	3	1.3005e-06	133.05		5		5
4486	387	FFGGYVPEMVITPDDQR	17	0	1969.92	IPI00008240;IPI00910687	IPI00008240	yes	no	3	4.7689e-15	134.04	2	2	2	2
5651	387	GFVIQDTVEQIR	12	0	1403.74	IPI00008240;IPI00910687;IPI01015558;IPI00976594	IPI00008240	yes	no	2,3	1.5866e-24	176.18	2	11	2	11
6492	387	GVGVFGDMAQDTGIPADIWR	20	0	2104	IPI00008240;IPI00910687	IPI00008240	yes	no	3	1.0868e-21	136.01	1		1
9262	387	IINAVEIK	8	0	898.549	IPI00008240;IPI00910687;IPI01015558;IPI00976594	IPI00008240	yes	no	2	0.0045546	103.74	1	4	1	4
10806	387	ITQDIFQQIIK	11	0	1345.76	IPI00008240;IPI00910687;IPI01015558;IPI00976594	IPI00008240	yes	no	3	0.024628	72.2	1		1
13640	387	NPEQVDIYQFMAK	13	0	1581.75	IPI00008240;IPI00910687	IPI00008240	yes	no	2,3	2.6024e-10	140.24		5		5
14793	387	RIEEWIGR	8	1	1057.57	IPI00008240;IPI00910687;IPI01015558;IPI00976594	IPI00008240	yes	no	3	0.0040081	107.9	2	2	2	2
16682	387	TIPGSDWTPNAQFITR	16	0	1802.9	IPI00008240;IPI00910687;IPI01015558;IPI00976594	IPI00008240	yes	no	3	0.0018528	83.087		3		3
19440	387	YHIIHADIYR	10	0	1299.67	IPI00008240;IPI00910687;IPI01015558;IPI00976594	IPI00008240	yes	no	2,3	1.2682e-22	176.6	6	5	6	5
9904	388	INMMIANIYK	10	0	1209.62	IPI00008248;IPI00915282	IPI00008248	yes	no	3	0.0011055	108.98	2	5	2	5
18323	388	VQEAIIHFR	9	0	1111.61	IPI00008248;IPI00915282	IPI00008248	yes	no	3	0.0024682	103.55	1	1	1	1
1682	389	DAEIAGSPEIIEFIGTR	17	0	1816.92	IPI00328868;IPI00008253	IPI00328868	yes	no	3	2.375e-19	150.26	1	1	1	1
431	390	AGAAPYVQAFDSIIAGPVAEYIK	23	0	2350.22	IPI00008274;IPI01009563;IPI00646869;IPI00644589;IPI00641881;IPI00647351;IPI00644109;IPI00646269;IPI00642414	IPI00008274	yes	no	3,4	7.4542e-44	161.35	1	2	1	2
3436	390	EIGGDVQK	8	0	844.429	IPI00008274;IPI00639931;IPI01009563;IPI00646869;IPI00645789;IPI00644589;IPI00641881;IPI00647351;IPI00644109;IPI00646269;IPI00642414	IPI00008274	yes	no	2	8.018e-05	140.09	6	10	6	10
6688	390	HAEMVHTGIK	10	0	1121.57	IPI00008274;IPI00639931;IPI01009563;IPI00646869;IPI00645789;IPI00644589;IPI00641881;IPI00647351;IPI00644109;IPI00646269;IPI00642414	IPI00008274	yes	no	2,3	1.3847e-11	161.76	2	3	2	3
10412	390	ISDIIAPISEQIK	13	0	1425.81	IPI00008274;IPI00639931;IPI01009563;IPI00646869;IPI00645789;IPI00644589;IPI00641881;IPI00647351;IPI00644109;IPI00646269;IPI00642414	IPI00008274	yes	no	2,3	1.3754e-27	174.05	7	17	7	17
19820	391	YSITPPNHWGHPHR	14	0	1697.82	IPI00008333;IPI00552297;IPI00966172;IPI00383676	IPI00008333	yes	no	3,4	8.7811e-11	143.42	4	2	4	2
9941	392	INVHMDSIPHHR	12	0	1454.72	IPI00008351;IPI00940122	IPI00008351	yes	no	3,4	0.0015557	97.163	2	3	2	3
575	393	AHQIVMEGYNWCHDR	15	0	1914.83	IPI00008380;IPI00429689;IPI00815784;IPI00983774	IPI00008380	yes	no	3,4	1.3188e-43	194.98	4	4	4	4
5740	393	GGWGISPR	8	0	828.424	IPI00008380;IPI00429689;IPI00815784;IPI00974178;IPI00983774	IPI00008380	yes	no	2	0.0061261	100.74		2		2
10213	393	IQEVPHEGPMCDIIWSDPDDR	21	0	2508.11	IPI00008380;IPI00429689;IPI00974178;IPI00983774	IPI00008380	yes	no	3	9.0592e-74	201.18	2	2	2	2
12615	393	KYGNANVWK	9	1	1078.56	IPI00008380;IPI00429689;IPI00815784;IPI00974178;IPI00984991;IPI00976419;IPI00985356	IPI00008380	yes	no	3	1.7712e-11	156.51	2	3	2	3
19812	393	YSFIQFDPAPR	11	0	1339.66	IPI00008380;IPI00429689;IPI00815784;IPI00983167	IPI00008380	yes	no	2,3	8.7012e-05	123.79	6	5	6	5
1527	394	AVYTITSIYR	10	0	1185.64	IPI00008418;IPI00148255;IPI00219865;IPI00794003;IPI01010768;IPI01010009;IPI01015630;IPI00924568;IPI00924790;IPI01015711	IPI00008418	yes	no	2	0.00059712	115.71	1	2	1	2
10340	394	IQVEEVHQISR	11	0	1336.71	IPI00008418;IPI00148255;IPI00219865;IPI00794003;IPI01010768;IPI01010009	IPI00008418	yes	no	3	0.0026279	91.937	2	4	2	4
13026	394	MNSEEEDEVWQVIIGAR	17	0	2003.93	IPI00008418;IPI00148255;IPI00219865;IPI00794003;IPI01010768;IPI01010009;IPI01015630;IPI00924568;IPI00924790;IPI01015711	IPI00008418	yes	no	3	9.8055e-06	101.36	1		1
13379	394	NHIQIVK	7	0	850.502	IPI00008418;IPI00148255;IPI00219865;IPI00794003;IPI01010768;IPI01010009;IPI01015630	IPI00008418	yes	no	3	0.10029	67.035	1	3	1	3
17646	395	VGINWIAIVHK	11	0	1248.73	IPI00008422;IPI00220119;IPI00964879	IPI00008422	yes	no	3	0.0001405	119.16	3	3	3	3
6371	396	GSSNSYAIK	9	0	925.451	IPI00008433	IPI00008433	yes	yes	2	0.00027898	115.78	3	7	3	7
10780	396	ITNSMMMHGR	10	0	1176.52	IPI00008433;IPI00555941	IPI00008433	yes	no	2,3	9.127e-07	142	2	6	2	6
11460	396	KAQCPIVER	9	1	1099.58	IPI00008433	IPI00008433	yes	yes	3	0.0086198	93.374	1	3	1	3
14004	396	QAVDVSPIR	9	0	983.54	IPI00008433	IPI00008433	yes	yes	2	8.1842e-05	91.584	2	2	2	2
15029	396	RVNQAIWIICTGAR	14	1	1656.89	IPI00008433	IPI00008433	yes	yes	3	5.5347e-16	153.34	7	6	7	6
16537	396	TIAECIADEIINAAK	15	0	1630.82	IPI00008433	IPI00008433	yes	yes	3	9.5499e-17	151.55	2		2
18227	396	VNQAIWIICTGAR	13	0	1500.79	IPI00008433	IPI00008433	yes	yes	2,3	4.0528e-28	182.08	12	23	12	23
1017	397	AMQSIK	6	0	676.358	IPI00008438;IPI00978180;IPI00749512;IPI00478810;IPI00025842;IPI00414852;REV__IPI00796990;REV__IPI00291867;REV__IPI00935408;REV__IPI01012711	IPI00008438	yes	no	2	0.02727	106.76	1	6	1	6
2755	397	DYIHIPPEIVPATIR	15	0	1732.95	IPI00008438;IPI00978180;IPI00478810;IPI00414852	IPI00008438	yes	no	3	9.1268e-05	100.19	8	7	8	7
3264	397	EGVMVAK	7	0	732.384	IPI00014898;IPI00008438;IPI00978180;IPI00749512;IPI00478810;IPI00025842;IPI00414852	IPI00014898	no	no	2	0.013018	105.12	4	10
3855	397	EQFAWR	6	0	835.398	IPI00008438;IPI00978180;IPI00749512;IPI00478810;IPI00025842;IPI00398673	IPI00008438	yes	no	2	0.040389	99.919	1	2	1	2
6805	397	HFYWYITNEGIQYIR	15	0	2001.97	IPI00008438;IPI00978180;IPI00749512;IPI00478810	IPI00008438	yes	no	3	2.5998e-06	122.33	3		3
7071	397	HPEIADK	7	0	808.408	IPI00008438;IPI00978180;IPI00749512;IPI00478810;IPI00025842;IPI00414852	IPI00008438	yes	no	3	0.038353	84.244	1	4	1	4
7498	397	IAIYEIIFK	9	0	1108.65	IPI00008438;IPI00978180;IPI00749512;IPI00478810;IPI00414852	IPI00008438	yes	no	2,3	2.7037e-08	148.05	17	2	17	2
11408	397	KAEAGAGSATEFQFR	15	1	1568.76	IPI00008438;IPI00749512;IPI00025842;IPI00398673	IPI00008438	yes	no	3	4.0728e-24	170.18	2	7	2	7
11553	397	KDVHMPK	7	1	853.448	IPI00008438;IPI00978180;IPI00749512;IPI00478810;IPI00025842;IPI00414852;IPI00878854	IPI00008438	yes	no	2	0.050418	82.279	2	2	2	2
13802	397	NVPNIHVMK	9	0	1050.56	IPI00008438;IPI00978180;IPI00749512;IPI00478810;IPI00025842;IPI00414852	IPI00008438	yes	no	3	0.01038	88.948	1	3	1	3
15134	397	SAVPPGADK	9	0	840.434	IPI00008438;IPI00978180;IPI00749512;IPI00478810;IPI00398673;IPI00816715	IPI00008438	yes	no	2	0.0062028	95.358		4		4
15135	397	SAVPPGADKK	10	1	968.529	IPI00008438;IPI00978180;IPI00749512;IPI00478810;IPI00398673;IPI00816715	IPI00008438	yes	no	3	0.078437	82.287	2	1	2	1
1934	398	DGMEYPFIGEGEPHVDGEPGDIR	23	0	2515.1	IPI00008454;IPI00927297	IPI00008454	yes	no	3,4	1.3121e-80	190.55	5	6	5	6
3885	398	EQITEEAR	8	0	974.467	IPI00008454;IPI00927297	IPI00008454	yes	no	2	0.02974	77.732	1	1	1	1
4976	398	FQDIGAAYEVISDSEK	16	0	1770.83	IPI00008454	IPI00008454	yes	yes	2,3	1.8514e-45	194.4	4	15	4	15
4977	398	FQDIGAAYEVISDSEKR	17	1	1926.93	IPI00008454	IPI00008454	yes	yes	3	0.0015082	84.508	5	3	5	3
7488	398	IAIQIHPDR	9	0	1061.6	IPI00008454	IPI00008454	yes	yes	3	0.0019036	105.14	1	2	1	2
7489	398	IAIQIHPDRNPDDPQAQEK	19	1	2184.09	IPI00008454	IPI00008454	yes	yes	3,4	2.2735e-36	172.82	5	11	5	11
9061	398	IIGVPR	6	0	653.422	IPI00008454	IPI00008454	yes	yes	2	0.058137	93.154		2		2
11757	398	KGEGIPNFDNNNIK	14	1	1558.77	IPI00008454;IPI00927297	IPI00008454	yes	no	3	1.4846e-63	219.43	2	6	2	6
11894	398	KIAIQIHPDR	10	1	1189.69	IPI00008454	IPI00008454	yes	yes	3	0.0097121	82.645		1		1
11895	398	KIAIQIHPDRNPDDPQAQEK	20	2	2312.19	IPI00008454	IPI00008454	yes	yes	4	0.0030801	91.657	1	1	1	1
12352	398	KQYDTYGEEGIK	12	1	1429.67	IPI00008454	IPI00008454	yes	yes	3	1.4459e-13	161.67	3	5	3	5
1234	399	ASFHEIYNMYK	11	0	1401.64	IPI00816452;IPI00941711;IPI00069126;IPI00816461;IPI00008455;IPI00844172;IPI00642722	IPI00816452	yes	no	3	4.1692e-05	127.76	2	1	2	1
4296	399	FAEFDQIMK	9	0	1127.53	IPI00816452;IPI00941711;IPI00069126;IPI00816461;IPI00008455;IPI00844172;IPI00642722	IPI00816452	yes	no	2,3	1.0634e-05	129.38	2	5	2	5
5147	399	FVEIHFNEK	9	0	1161.58	IPI00816452;IPI00941711;IPI00069126;IPI00816461;IPI00008455;IPI00844172;IPI00642722	IPI00816452	yes	no	3	0.050228	68.735	1	1	1	1
10904	399	IVEANPIIEAFGNAK	15	0	1584.85	IPI00816452;IPI00941711;IPI00069126;IPI00816461;IPI00008455;IPI00844172;IPI00642722	IPI00816452	yes	no	3	0.039102	83.53		1		1
13845	399	NYHIFYR	7	0	1011.49	IPI00816452;IPI00941711;IPI00069126;IPI00816461;IPI00008455;IPI00844172;IPI00642722	IPI00816452	yes	no	2,3	0.011617	120.65	13	11	13	11
14091	399	QFEEIWER	8	0	1135.53	IPI00816452;IPI00941711;IPI00069126;IPI00816461;IPI00008455;IPI00844172;IPI00642722	IPI00816452	yes	no	2	0.031852	76.827	1	1	1	1
15994	399	SSVVGGFVSHYIIEK	15	0	1620.85	IPI00816452;IPI00941711;IPI00069126;IPI00816461;IPI00008455;IPI00844172;IPI00642722	IPI00816452	yes	no	3	1.8355e-08	136.27	3	2	3	2
17116	399	TVYSHIFDHVVNR	13	0	1585.8	IPI00816452;IPI00941711;IPI00069126;IPI00816461;IPI00008455;IPI00844172;IPI00642722	IPI00816452	yes	no	3,4	1.6824e-10	143.97	9	5	9	5
18748	399	VYHAWK	6	0	802.413	IPI00816452;IPI00941711;IPI00069126;IPI00816461;IPI00008455;IPI00844172;IPI00642722	IPI00816452	yes	no	3	0.16402	70.118	2	2	2	2
6786	400	HFIPYNAK	8	0	988.513	IPI00790010;IPI00915753;IPI00008468;IPI00910196;IPI00916366	IPI00790010	yes	no	3	0.058511	68.422	1	1	1	1
8297	400	IFTFICK	7	0	927.489	IPI00790010;IPI00915753;IPI00008468	IPI00790010	yes	no	2	0.012946	108.09	3	2	3	2
12004	401	KIHAQWQK	8	1	1037.58	IPI00008475;IPI00963899	IPI00008475	yes	no	3	0.043195	75.213	1	2	1	2
12904	401	MIINDFINDQNR	12	0	1491.71	IPI00008475;IPI00963899	IPI00008475	yes	no	2,3	0.0022335	101.71	1	4	1	4
1638	402	CMMYYK	6	0	894.344	IPI00008483;IPI00980468	IPI00008483	yes	no	2	0.027627	105.82		4		4
2286	402	DIWVQEPESK	10	0	1229.59	IPI00008483;IPI00980468	IPI00008483	yes	no	2,3	8.6641e-16	166.55	2	15	2	15
2668	402	DVPAVEITHTFWER	14	0	1698.84	IPI00008483;IPI00980468	IPI00008483	yes	no	2,3,4	4.4246e-91	231.67	17	21	17	21
3438	402	EIGIETYK	8	0	951.491	IPI00008483;IPI00328156;IPI00976528;IPI00922603	IPI00008483	yes	no	2	8.993e-06	160.75	5	12	5	12
3548	402	EIPTDAPWEAQHADK	15	0	1706.79	IPI00008483;IPI00980468	IPI00008483	yes	no	3	5.8288e-33	182.1	3	6	3	6
3549	402	EIPTDAPWEAQHADKWDK	18	1	2135.99	IPI00008483;IPI00980468	IPI00008483	yes	no	3,4	8.4624e-39	174.59	12	12	12	12
5160	402	FVGGSGQVSER	11	0	1121.55	IPI00008483;IPI00980468;IPI00328156;IPI00976528;IPI00922603	IPI00008483	yes	no	2	0.0017689	96.171	1	7	1	7
7667	402	ICEIYAK	7	0	895.447	IPI00008483;IPI00980468;IPI00328156;IPI00976528;IPI00922603	IPI00008483	yes	no	2	0.012946	108.09	2	4	2	4
8165	402	IFFAGTETATK	11	0	1184.61	IPI00008483;IPI00980468	IPI00008483	yes	no	2,3	5.6247e-23	177.78	5	16	5	16
8617	402	IHFRPEIPAER	11	1	1363.74	IPI00008483;IPI00980468	IPI00008483	yes	no	2,3	4.077e-05	135.55	6	8	6	8
9456	402	IITEYGVSVIVIEAR	15	0	1660.94	IPI00008483	IPI00008483	yes	yes	2	9.5279e-05	99.941	1	2	1	2
9721	402	IMDIIGDQVK	10	0	1130.6	IPI00008483;IPI00980468	IPI00008483	yes	no	2,3	1.2401e-15	163.38	4	17	4	17
9864	402	INHPVTHVDQSSDNIIIETINHEHYECK	28	0	3341.57	IPI00008483;IPI00980468	IPI00008483	yes	no	5,6	0.024895	54.728	5	3	5	3
10056	402	IPMGAVIK	8	0	827.494	IPI00008483;IPI00980468	IPI00008483	yes	no	2	0.01123	91.906		1		1
11066	402	IVQYVK	6	0	748.448	IPI00008483	IPI00008483	yes	yes	2	0.026083	109.88	6	11	6	11
11723	402	KFVGGSGQVSER	12	1	1249.64	IPI00008483;IPI00980468;IPI00328156;IPI00976528;IPI00922603	IPI00008483	yes	no	2,3	1.3982e-24	178.71	5	10	5	10
11902	402	KICEIYAK	8	1	1023.54	IPI00008483;IPI00980468;IPI00328156;IPI00976528;IPI00922603	IPI00008483	yes	no	3	0.0034753	109.71	1	1	1	1
13303	402	NEHVDYVDVGGAYVGPTQNR	20	0	2189.01	IPI00008483	IPI00008483	yes	yes	2,3,4	9.6224e-102	228.3	7	26	7	26
13511	402	NIPSVSGIIK	10	0	1026.61	IPI00008483;IPI00980468	IPI00008483	yes	no	2	0.00034512	121.9	2	6	2	6
16569	402	TIDNMGK	7	0	777.369	IPI00008483	IPI00008483	yes	yes	2	0.012652	116.54	4	11	4	11
17865	402	VIGSQEAIHPVHYEEK	16	0	1834.92	IPI00008483;IPI00980468	IPI00008483	yes	no	3,4	1.2531e-34	176.89	8	16	8	16
18485	402	VTEKDIWVQEPESK	14	1	1686.85	IPI00008483;IPI00980468	IPI00008483	yes	no	3,4	2.3078e-31	177.42	3	12	3	12
19893	402	YVINAIPPTITAK	13	0	1399.81	IPI00008483;IPI00980468	IPI00008483	yes	no	2,3	3.4298e-07	136.53	5	10	5	10
1397	403	AVDAGINVMPYIK	13	0	1389.73	IPI00008485;IPI01011965	IPI00008485	yes	no	3	0.13579	81.92		1		1
1444	403	AVIAESYER	9	0	1036.52	IPI00008485;IPI01011965	IPI00008485	yes	no	2	0.0029392	102.51		3		3
2285	403	DIWPTRDEIQAVER	14	1	1726.86	IPI00008485;IPI01011965	IPI00008485	yes	no	3	0.00015952	117.86		1		1
5632	403	GFQVAPEHHNDHK	13	0	1514.7	IPI00008485;IPI01011965;IPI00643595	IPI00008485	yes	no	3,4	7.4842e-16	158.04	4	4	4	4
6202	403	GPFIIGIK	8	0	843.522	IPI00008485;IPI01011965	IPI00008485	yes	no	2	0.00011672	138.07	1	6	1	6
7737	403	IDFEKEPIGVNAK	13	1	1458.77	IPI00008485;IPI01011965	IPI00008485	yes	no	3	4.2539e-06	127.87	1	3	1	3
8178	403	IFFWNSK	7	0	940.481	IPI00008485;IPI01011965	IPI00008485	yes	no	2,3	0.0089425	129.96	10	15	10	15
9319	403	IIPPGSGIIHQVNIEYIAR	19	0	2089.17	IPI00008485;IPI01011965;IPI00643595	IPI00008485	yes	no	3	0.18196	49.223		1		1
12284	403	KQDIENIIHWNVTQHK	16	1	2002.04	IPI00008485;IPI00643595	IPI00008485	yes	no	4	2.5894e-05	101.62	2		2
12624	403	KYIQAVGMFR	10	1	1211.65	IPI00008485;IPI01011965;IPI00643595;IPI00930318	IPI00008485	yes	no	3	0.09579	63.216	6	5	6	5
13422	403	NIEVPFKPAR	10	1	1169.66	IPI00008485;IPI00643595	IPI00008485	yes	no	3	0.0070918	99.688		3		3
14029	403	QDIENIIHWNVTQHK	15	0	1873.94	IPI00008485;IPI00643595	IPI00008485	yes	no	4	0.00015203	96.464	1	1	1	1
17928	403	VIIQDFTGVPAVVDFAAMR	19	0	2048.08	IPI00008485;IPI00643595	IPI00008485	yes	no	3	3.0428e-36	169.64	2		2
18905	403	WGSQAFHNMR	10	0	1232.55	IPI00008485;IPI01011965;IPI00643595	IPI00008485	yes	no	2,3	0.00036021	121.5	4	7	4	7
19582	403	YIQAVGMFR	9	0	1083.55	IPI00008485;IPI01011965;IPI00643595;IPI00930318	IPI00008485	yes	no	2	0.042015	69.954	1	4	1	4
19787	403	YQQAGIPIIVIAGK	14	0	1469.86	IPI00008485;IPI01011965	IPI00008485	yes	no	2,3	0.012658	80.312	1	6	1	6
19855	403	YTIIIPENIKPQMK	14	1	1686.94	IPI00008485;IPI01011965	IPI00008485	yes	no	3	1.5126e-31	180.18	2	1	2	1
4570	404	FGPAISVK	8	0	817.47	IPI00008524;IPI00410017;IPI00977833;IPI00909378;IPI00301154;IPI00794246;IPI01015547;IPI00981366;IPI00979685	IPI00008524	yes	no	2	0.0070412	98.997		4		4
5063	404	FSPAGPIISIR	11	0	1156.66	IPI00008524;IPI00410017;IPI00796945;IPI00909378;IPI00301154;IPI00981366;IPI00556259;IPI00979384;IPI01013146;IPI00979703;IPI00306870;IPI00980706;IPI00984994;IPI00975929	IPI00008524	no	no	2,3	3.5822e-07	142	2	12
5585	404	GFGFVSFER	9	0	1044.5	IPI00008524;IPI00410017;IPI00977833;IPI00796945;IPI00909378;IPI00301154;IPI00794246;IPI01015547;IPI00979685	IPI00008524	yes	no	2	3.2318e-08	147.52	3	2	3	2
6633	404	GYGFVHFETQEAAER	15	0	1739.79	IPI00008524;IPI00410017;IPI00977833;IPI00796945;IPI00909378;IPI01015547;IPI00981366;IPI00983093	IPI00008524	yes	no	3	6.0706e-17	155.48	5	4	5	4
8253	404	IFPIIQAMHPTIAGK	15	0	1635.92	IPI00008524;IPI00410017;IPI00977833;IPI00796945;IPI00909378;IPI00301154;IPI00976567;IPI00983034	IPI00008524	yes	no	3,4	1.7374e-17	160.38	11	7	11	7
9592	404	IKDIFGK	7	1	819.485	IPI00008524;IPI00410017;IPI00977833;IPI00796945;IPI00909378;IPI00301154;IPI00794246;IPI00981366;IPI00979685	IPI00008524	yes	no	2,3	0.061949	96.253	3	3	3	3
10884	404	IVATKPIYVAIAQR	14	1	1541.93	IPI00008524;IPI00410017;IPI00977833;IPI00796945;IPI00909378;IPI00301154;IPI00794246;IPI01015547;IPI00983162	IPI00008524	yes	no	3,4	0.00011606	120.57	6	16	6	16
11617	404	KEFSPFGTITSAK	13	1	1411.73	IPI00008524;IPI00410017;IPI00977833;IPI00796945;IPI00909378;IPI00794246;IPI01015547;IPI00979685;IPI00983162	IPI00008524	yes	no	3	3.4377e-58	213.06	3	3	3	3
12376	404	KSGVGNIFIK	10	1	1061.62	IPI00008524;IPI00410017;IPI00977833;IPI00796945;IPI00556259;IPI00979384;IPI01013146;IPI00979703;IPI00983093;IPI00306870;IPI00796139;IPI00061206;IPI00647470	IPI00008524	yes	no	2,3	0.001096	111.65	5	6	5	6
13334	404	NFGEDMDDER	10	0	1226.45	IPI00008524;IPI00410017;IPI00977833;IPI00796945;IPI00909378;IPI00301154;IPI00794246;IPI01015547;IPI00981366	IPI00008524	yes	no	2	0.00027298	123.79		4		4
13395	404	NIDDGIDDER	10	0	1160.49	IPI00008524;IPI00410017;IPI00977833;IPI00909378;IPI00301154;IPI00794246;IPI01015547;IPI00979685	IPI00008524	yes	no	2	0.030703	81.525	1	6	1	6
13968	404	QAHITNQYMQR	11	0	1388.66	IPI00008524;IPI00410017;IPI00977833;IPI00796945;IPI00909378;IPI00794246;IPI01015547;IPI00983162	IPI00008524	yes	no	3	5.5325e-16	164.97	1	2	1	2
15393	404	SGVGNIFIK	9	0	933.528	IPI00008524;IPI00410017;IPI00977833;IPI00796945;IPI00556259;IPI00979384;IPI01013146;IPI00979703;IPI00983093;IPI00306870;IPI00796139;IPI00061206;IPI00647470	IPI00008524	yes	no	2	0.00099996	111.06	1	5	1	5
15734	404	SKVDEAVAVIQAHQAK	16	1	1692.92	IPI00008524;IPI00410017;IPI00977833;IPI00796945;IPI00909378;IPI00301154;IPI00976567;IPI00983034;IPI00983949;IPI00983704	IPI00008524	yes	no	3,4	2.7024e-70	211.51	8	5	8	5
18180	404	VMTDESGK	8	0	865.385	IPI00008524;IPI00410017;IPI00977833;IPI00796945;IPI00909378;IPI00301154;IPI00794246;IPI01015547;IPI00979685	IPI00008524	yes	no	2	0.0036768	106.36	4	10	4	10
19772	404	YQGVNIYVK	9	0	1082.58	IPI00008524;IPI00410017;IPI00977833;IPI00796945;IPI00909378;IPI00794246;IPI01015547;IPI00979685;IPI00556259;IPI00306870	IPI00008524	yes	no	2,3	4.9591e-17	175.51	1	12	1	12
52	405	AAGVNVEPFWPGIFAK	16	0	1701.89	IPI00008527	IPI00008527	yes	yes	2,3,4	3.1186e-121	244.67	32	34	32	34
9834	405	INAIIK	6	0	670.438	IPI00008527;REV__IPI00784119;REV__IPI01010933	IPI00008527	yes	no	2	0.061798	91.584	7	10	7	10
7599	406	IASVPAGGAVAVSAAPGSAAPAAGSAPAAAEEK	33	0	2773.42	IPI00008529;IPI00981000	IPI00008529	yes	no	3,4,5	7.0013e-208	252.13	4	10	4	10
8856	406	IIDSVGIEADDDR	13	0	1416.67	IPI00008529	IPI00008529	yes	yes	2,3	1.7037e-28	184.03	6	19	6	19
8857	406	IIDSVGIEADDDRINK	16	1	1771.9	IPI00008529	IPI00008529	yes	yes	2,3,4	2.4983e-159	270.79	6	26	6	26
12018	406	KIIDSVGIEADDDR	14	1	1544.77	IPI00008529	IPI00008529	yes	yes	3	6.4806e-06	126.83		4		4
12019	406	KIIDSVGIEADDDRINK	17	2	1899.99	IPI00008529	IPI00008529	yes	yes	3	2.1637e-59	203.27	1	1	1	1
13411	406	NIEDVIAQGIGK	12	0	1255.68	IPI00008529;IPI00981000	IPI00008529	yes	no	2,3	2.8321e-25	183.79	14	27	14	27
19875	406	YVASYIIAAIGGNSSPSAK	19	0	1867.97	IPI00008529	IPI00008529	yes	yes	2,3,4	1.5376e-222	289.98	20	36	20	36
367	407	AFIADPSAFVAAAPVAAATTAAPAAAAAPAK	31	0	2751.46	IPI00008530;IPI00556485	IPI00008530	yes	no	3,4,5	2.1327e-15	99.6	5	18	5	18
1513	407	AVVIMGK	7	0	716.425	IPI00008530;IPI00556485	IPI00008530	yes	no	2	0.0078504	132.72	5	11	5	11
1626	407	CFIVGADNVGSK	12	0	1265.61	IPI00008530;IPI00556485;IPI00871646;IPI00868999	IPI00008530	yes	no	3	0.073898	61.958	6	3	6	3
2364	407	DMIIANK	7	0	803.421	IPI00008530;IPI00556485;IPI00871646;IPI00868999	IPI00008530	yes	no	2	0.0094949	128.57	5	10	5	10
2991	407	EDITEIR	7	0	874.44	IPI00008530;IPI00556485;IPI00871646;IPI00868999;IPI00062124	IPI00008530	yes	no	2	0.012798	114.19	7	12	7	12
4653	407	FIEGVR	6	0	719.397	IPI00008530;IPI00871646;IPI00062124	IPI00008530	yes	no	2	0.055522	94.151	2	9	2	9
5769	407	GHIENNPAIEK	11	0	1220.61	IPI00008530;IPI00556485;IPI00871646;IPI00868999	IPI00008530	yes	no	2,3	1.3596e-50	209.97	16	24	16	24
6186	407	GNVGFVFTK	9	0	967.513	IPI00008530;IPI00556485;IPI00871646;IPI00868999	IPI00008530	yes	no	2,3	2.4994e-11	152.34	9	22	9	22
6419	407	GTIEIISDVQIIK	13	0	1427.82	IPI00008530;IPI00871646	IPI00008530	yes	no	2,3	4.0726e-36	187.44	5	5	5	5
9313	407	IIPHIR	6	0	747.476	IPI00008530;IPI00556485;REV__IPI00010720;REV__IPI00964079;REV__IPI00964855;REV__IPI00965269;REV__IPI00965722;REV__IPI00940257	IPI00008530	yes	no	2	0.025873	110.43	4	6	4	6
9364	407	IIQIIDDYPK	10	0	1216.67	IPI00008530;IPI00556485;IPI00871646;IPI00868999	IPI00008530	yes	no	2,3	1.9133e-10	154.35	21	28	21	28
15804	407	SNYFIK	6	0	770.396	IPI00008530;IPI00556485;IPI00871646;IPI00868999	IPI00008530	yes	no	2	0.086596	81.297	1	3	1	3
16938	407	TSFFQAIGITTK	12	0	1312.7	IPI00008530;IPI00556485;IPI00871646;IPI00868999	IPI00008530	yes	no	2,3	1.4293e-24	177.1	12	16	12	16
1291	408	ASVMIFMK	8	0	925.477	IPI00008552	IPI00008552	yes	yes	2	8.4179e-05	139.19	1	4	1	4
1604	408	AYSNWPTYPQIYVK	14	0	1728.85	IPI00008552	IPI00008552	yes	yes	3	0.00098145	93.959	2	4	2	4
19291	408	YEISSVPTFIFFK	13	0	1576.82	IPI00008552	IPI00008552	yes	yes	3	1.0024e-15	156.58	6	4	6	4
9033	409	IIGHFYASQMAQR	13	0	1520.76	IPI00008557;IPI00930694	IPI00008557	yes	no	3	8.8256e-07	132.25	3	4	3	4
9526	409	IIVPTQYVGAIIGK	14	0	1470.88	IPI00008557	IPI00008557	yes	yes	2,3	8.2946e-32	176.89	7	20	7	20
9623	409	IKEENFFGPK	10	1	1207.62	IPI00008557;IPI00930694	IPI00008557	yes	no	3	0.016308	88.681	4	4	4	4
11297	409	IYIGNINESVTPADIEK	17	0	1874.96	IPI00008557;IPI00930694	IPI00008557	yes	no	3	1.6643e-08	108.71		1		1
12482	409	KVEQDTETK	9	1	1076.54	IPI00008557;IPI00930694	IPI00008557	yes	no	3	0.013795	87.639		5		5
12897	409	MIIEIMHK	8	0	1013.54	IPI00008557	IPI00008557	yes	yes	3	0.012014	91.065	5	5	5	5
14798	409	RIEIEHSVPK	10	1	1206.67	IPI00008557;IPI00930694	IPI00008557	yes	no	3	0.013551	80.231	1	1	1	1
17221	410	VAFTIIEK	8	0	919.538	IPI00008569;IPI00927850;IPI00909691	IPI00008569	yes	no	2	0.0028298	109.86	1	5	1	5
4912	411	FNFVGK	6	0	710.375	IPI00008575;IPI00479209;IPI00385834;IPI00166708;IPI00903310;IPI00008570;IPI00744983;IPI00789036;IPI01010991;IPI00980277	IPI00008575	yes	no	2	0.029579	104.04	1	7	1	7
9054	411	IIGPQGNTIK	10	0	1039.6	IPI00008575;IPI00479209;IPI00385834	IPI00008575	yes	no	2	0.030773	70.908	1	5	1	5
10190	411	IQEETGAK	8	0	874.44	IPI00008575;IPI00479209;IPI00385834;IPI00166708;IPI00903310	IPI00008575	yes	no	2	0.0092155	94.85		4		4
10622	411	ISVIGK	6	0	615.396	IPI00008575;IPI00479209;IPI00385834;IPI00797574	IPI00008575	yes	no	2	0.068723	88.591	1	5	1	5
11494	411	KDDEENYIDIFSHK	14	1	1751.8	IPI00008575;IPI00479209;IPI00385834;IPI00082310	IPI00008575	yes	no	3,4	6.2978e-32	180.09	5	4	5	4
19578	411	YIPEIMAEK	9	0	1092.55	IPI00008575;IPI00479209;IPI00385834;IPI00166708;IPI00903310;IPI00082310;IPI00008570;IPI00744983	IPI00008575	yes	no	2,3	1.9638e-11	154.49	2	10	2	10
13455	412	NIHNQQHHPIWIIK	14	0	1776.95	IPI00008579	IPI00008579	yes	yes	3,4	2.05e-16	158.3	4	2	4	2
2287	413	DIYANNVISGGTTMYPGIADR	21	0	2227.06	IPI00008603;IPI00025416;IPI01011107;IPI00984879;IPI00916212;IPI00023006;IPI00930343	IPI00023006	no	no	2,3	1.8393e-52	181.34	1	10
2561	413	DSYVGDEAQSK	11	0	1197.52	CON__P60712;IPI00021439;IPI00021440;IPI00930226;IPI00894365;IPI01011344;IPI00790339;IPI00796881;IPI00942659;IPI00893981;IPI00894523;IPI00893604;IPI00008603;IPI00025416;IPI01011107;IPI00984879;IPI00878173;IPI00921887;IPI00645534;IPI00917820;IPI00917457;IPI00917282;IPI00023006;IPI00930343;IPI00021428;IPI00922693;IPI00514530;IPI00414057	CON__P60712	no	no	2,3	8.1061e-23	174.4	32	47
3597	413	EITAIAPSTMK	11	0	1160.61	CON__P60712;IPI00021439;IPI00021440;IPI00930226;IPI00894365;IPI01011344;IPI01015522;IPI01012766;IPI00008603;IPI00025416;IPI01011107;IPI00984879;IPI00878173;IPI00916212;IPI00023006;IPI00930343;IPI00021428;IPI00922693;IPI00514530;IPI00414057	CON__P60712	no	no	2,3	9.6986e-42	198.62	44	57
6668	413	GYSFVTTAER	10	0	1129.54	IPI00008603;IPI00025416;IPI01011107;IPI00984879;IPI00878173;IPI00916212;IPI00023006;IPI00930343;IPI00021428;IPI00922693	IPI00023006	no	no	2	1.5549e-10	155.84	5	11
11181	413	IWHHSFYNEIR	11	0	1500.73	IPI00008603;IPI00025416;IPI00984879;IPI00916212;IPI00921887;IPI00645534;IPI00917820	IPI00008603	yes	no	2,3,4	3.2853e-42	205.18	83	57	83	57
11526	413	KDIYANNVISGGTTMYPGIADR	22	1	2355.15	IPI00008603;IPI00025416;IPI01011107;IPI00984879;IPI00916212;IPI00023006;IPI00930343	IPI00023006	no	no	3,4	3.5534e-70	188.96	4	13
14079	413	QEYDEAGPSIVHR	13	0	1499.7	IPI00008603;IPI01011107;IPI00984879;IPI00878173;IPI00023006;IPI00930343;IPI00021428;IPI00922693;IPI00514530;IPI00414057	IPI00023006	no	no	3	1.6216e-28	184.1	1	7
16984	413	TTGIVIDSGDGVTHNVPIYEGYAIPHAIMR	30	0	3195.6	IPI00008603;IPI00025416;IPI01011107;IPI00984879;IPI00878173;IPI00916212;IPI00023006;IPI00930343;IPI00021428	IPI00023006	no	no	4	1.5823e-99	190.64	4	3
17270	413	VAPEEHPTIITEAPINPK	18	0	1955.04	IPI00008603;IPI00025416;IPI00984879;IPI00916212;IPI00921887;IPI00645534;IPI00917820;IPI00023006;IPI00930343;IPI00021428;IPI00514530;IPI00414057	IPI00023006	no	no	3	2.7073e-39	175.15	2	8
19740	413	YPIEHGIITNWDDMEK	16	0	1959.9	IPI00008603;IPI00025416;IPI00984879;IPI00921887;IPI00645534;IPI00917820;IPI00917457;IPI00917282;IPI00023006;IPI00930343;IPI00021428;IPI00922693;IPI00514530;IPI00414057	IPI00023006	no	no	2,3,4	3.0284e-26	168.61	78	106
9325	414	IIPSIIGR	8	0	867.554	IPI00008708;IPI00642046	IPI00008708	yes	no	2	0.011235	91.9	1	8	1	8
12527	414	KVPVSVNIISK	11	1	1182.73	IPI00008708;IPI00642046	IPI00008708	yes	no	3	0.0010163	103.26		4		4
82	415	AAIVMYWK	8	0	980.515	IPI00008711;IPI00965034	IPI00008711	yes	no	2	0.0012318	117.17	3	4	3	4
4257	415	EYIIDMASR	9	0	1096.52	IPI00008711;IPI00965034	IPI00008711	yes	no	2	0.066642	66.299		3		3
5427	415	GDMEIPFEEVIER	13	0	1562.73	IPI00008711	IPI00008711	yes	yes	2,3	8.3746e-12	150.46	3	3	3	3
16723	415	TITDIIIR	8	0	943.57	IPI00008711	IPI00008711	yes	yes	2	0.040201	73.248	2	3	2	3
19043	415	WPVFEIK	7	0	917.501	IPI00008711;IPI01013903	IPI00008711	yes	no	2	0.051124	78.616	4	5	4	5
19743	415	YPIHAIMEIK	10	0	1213.65	IPI00008711;IPI00965034	IPI00008711	yes	no	3	0.049215	67.563		1		1
10118	416	IPVVVPIHSIDEK	13	0	1444.83	IPI00008728;IPI01012768	IPI00008728	yes	no	3	0.0015657	99.283		2		2
15346	416	SGESNTHQDIEEKDR	15	1	1743.77	IPI00008728;IPI01012768	IPI00008728	yes	no	4	0.055697	69.03	1		1
3350	417	EIASIIR	7	0	800.476	IPI00008787;IPI00555656;IPI00746033	IPI00008787	no	no	2	0.022634	94.407		1
4710	417	FIIGSWIEQAR	11	0	1318.7	IPI00008787;IPI00555656;IPI00746033	IPI00008787	yes	no	2	5.0391e-06	137.98	3	4	3	4
11539	417	KDPVPDIAAWVTSFAAR	17	1	1842.96	IPI00008787;IPI00555656;IPI00746033	IPI00008787	yes	no	3	0.0023247	81.311	2		2
3591	418	EISPDIGK	8	0	857.449	IPI00008821;IPI00896511	IPI00008821	yes	no	2	0.067145	67.169	1	1	1	1
15827	418	SPGAQIWIFPSAAGIHR	17	0	1806.95	IPI00008821	IPI00008821	yes	yes	3	2.2397e-08	106.14		1		1
1288	419	ASVIFDTMQHHIAINR	16	0	1851.94	IPI00008868	IPI00008868	yes	yes	3,4	3.3527e-15	150.22	7	3	7	3
1446	419	AVIDAIIEGK	10	0	1027.59	IPI00008868;IPI00020356;IPI00789977;IPI00887765	IPI00008868	yes	no	2,3	1.1744e-15	163.94	4	4	4	4
4237	419	EWYQETHEK	9	0	1248.54	IPI00008868	IPI00008868	yes	yes	3	0.0024682	103.55	2	1	2	1
7047	419	HNIQDFINIK	10	0	1240.66	IPI00008868;IPI00965014;IPI00966431	IPI00008868	yes	no	3	0.00074865	113.71	1	2	1	2
13762	419	NVDVEFFK	8	0	996.492	IPI00008868	IPI00008868	yes	yes	2	0.0010045	120.12		4		4
16088	419	SVGNTIDPVIIFQK	14	0	1529.85	IPI00008868;IPI00965014;IPI00966431	IPI00008868	yes	no	3	5.4165e-07	129.54		5		5
207	420	ADQEEQIHPR	10	0	1221.57	IPI00008918;IPI00883896;IPI00796705	IPI00008918	yes	no	3	0.12897	57.348		2		2
2996	420	EDKPAETK	8	1	916.45	IPI00008918;IPI00883896;IPI00796705;IPI00220466	IPI00008918	yes	no	3	0.086849	77.923		6		6
6190	420	GNYDEGFGHRPHK	13	1	1512.69	IPI00008918;IPI00883896;IPI00796705;IPI00220466	IPI00008918	yes	no	3,4	0.00022134	122.34	6	3	6	3
7651	420	IAWPPPTEIGSSGSAIEEGIK	21	0	2138.09	IPI00008918;IPI00883896;IPI00796705;IPI00220466	IPI00008918	yes	no	2,3	7.1628e-15	118.55	3	8	3	8
[truncated: 17,649 more rows]
