# Supplementary material for: Quantitative Proteomics Analysis of Altered Protein Expression in the Placental Villous Tissue of Early Pregnancy Loss Using Isobaric Tandem Mass Tags
Source: Biomed Res Int. 2014 Mar 13;2014:647143. doi: 10.1155/2014/647143 (PMC3971554; doi:10.1155/2014/647143)
Supplement: Supplementary file 1 — Supplemental Docx1 provided the materials and methods such as reagents, western blot analysis and immunohistochemistry. Supplemental Data 1 gave the identified proteins information. Supplemental Data 2 gave the identified peptide information. Supplemental Data 3 listed the human placental villous tissue proteins that were differentially abundant between the two groups identified in Human placental villous (≧1.2-fold). Supplemental Graph 1 showed the GO analysis in both the molecular function and biological process of the differentially expressed proteins. [file 647143.f1.zip › Supplementray Materials/Supplemental Data 3.xlsx]

## Sheet: Sheet1
Supplemental Data 3. The human placental villous tissue proteins that were differentially abundant between the two groups (≥1.2-fold)
Protein	Associated Gene Name	Associated Gene Name{Description}	Ensembl Gene ID	RefSeq Protein ID	Protein Descriptions	P value (T test)	Fold Change compared with control
IPI00647082	TBC1D13	TBC1D13{TBC1 domain family, member 13 [Source:HGNC Symbol,Acc:25571]}	ENSG00000107021	NP_060671	Isoform 1 of TBC1 domain family member 13;Isoform 2 of TBC1 domain family member 13	0.00291113	2.50717
IPI00953461	LARP4B	LARP4B{La ribonucleoprotein domain family, member 4B [Source:HGNC Symbol,Acc:28987]}	ENSG00000107929	NP_055970	La-related protein 4B;Uncharacterized protein	0.0496811	6.40455
IPI00022431	AHSG	AHSG{alpha-2-HS-glycoprotein [Source:HGNC Symbol,Acc:349]}	ENSG00000145192	NP_001613	cDNA FLJ55606, highly similar to Alpha-2-HS-glycoprotein;Alpha-2-HS-glycoprotein;cDNA FLJ56822, highly similar to Alpha-2-HS-glycoprotein	0.00895039	1.54343
IPI00295889	SRP19	SRP19{signal recognition particle 19kDa [Source:HGNC Symbol,Acc:11300]}	ENSG00000153037	NP_001191128;NP_003126	Signal recognition particle 19 kDa protein;signal recognition particle 19 kDa protein isoform 3	0.0430558	1.4241
IPI00011635	BCL2L13	BCL2L13{BCL2-like 13 (apoptosis facilitator) [Source:HGNC Symbol,Acc:17164]}	ENSG00000099968	NP_056182	Isoform 2 of Bcl-2-like protein 13;Isoform 1 of Bcl-2-like protein 13	0.0392591	1.46172
IPI00006181	EIF3D	EIF3D{eukaryotic translation initiation factor 3, subunit D [Source:HGNC Symbol,Acc:3278]}	ENSG00000100353	NP_003744	Eukaryotic translation initiation factor 3 subunit D;cDNA FLJ53917, highly similar to Eukaryotic translation initiation factor 3 subunit 7;cDNA FLJ51552, highly similar to Eukaryotic translation initiation factor 3 subunit 7	0.0189119	1.23051
IPI00009407	DAD1	DAD1{defender against cell death 1 [Source:HGNC Symbol,Acc:2664]}	ENSG00000129562	NP_001335	Dolichyl-diphosphooligosaccharide--protein glycosyltransferase subunit DAD1;10 kDa protein;9 kDa protein;7 kDa protein	0.00787541	1.22081
IPI00000783	PSMB8	PSMB8{proteasome (prosome, macropain) subunit, beta type, 8 (large multifunctional peptidase 7) [Source:HGNC Symbol,Acc:9545]}	ENSG00000230034;ENSG00000204264;ENSG00000206298;ENSG00000226201;ENSG00000230669;ENSG00000231631;ENSG00000235715;ENSG00000236443	NP_683720;NP_004150	Isoform 1 of Proteasome subunit beta type-8;proteasome subunit beta type-8 isoform E2 proprotein;Isoform 2 of Proteasome subunit beta type-8;Proteasome (Prosome, macropain) subunit, beta type, 8;Proteasome (Prosome, macropain) subunit, beta type, 8	0.015488	1.34022
IPI00103536	MADD	MADD{MAP-kinase activating death domain [Source:HGNC Symbol,Acc:6766]}	ENSG00000110514	NP_003673;NP_569829;NP_569826;NP_569832;NP_569831;NP_569827;NP_001129415;NP_569828;NP_001129416;NP_569830	Isoform 1 of MAP kinase-activating death domain protein;Isoform 2 of MAP kinase-activating death domain protein;Isoform 3 of MAP kinase-activating death domain protein;MAP kinase-activating death domain protein isoform h;Isoform 7 of MAP kinase-activating	0.00487516	1.22967
IPI00219344	HPCAL1	HPCAL1{hippocalcin-like 1 [Source:HGNC Symbol,Acc:5145]}	ENSG00000115756	NP_002140;NP_602293	Hippocalcin-like protein 1;Uncharacterized protein;Neuron-specific calcium-binding protein hippocalcin;Neurocalcin-delta	0.0101578	1.24484
IPI00003128	P4HA2	P4HA2{prolyl 4-hydroxylase, alpha polypeptide II [Source:HGNC Symbol,Acc:8547]}	ENSG00000072682	NP_001136071;NP_004190;NP_001017973;NP_001017974;NP_001136070	Isoform IIb of Prolyl 4-hydroxylase subunit alpha-2;Isoform IIa of Prolyl 4-hydroxylase subunit alpha-2	0.0406636	1.56452
IPI00306778	MMP11	MMP11{matrix metallopeptidase 11 (stromelysin 3) [Source:HGNC Symbol,Acc:7157]}	ENSG00000099953	NP_005931	Stromelysin-3;cDNA PSEC0140 fis, clone PLACE1005783, highly similar to STROMELYSIN-3;Protein	0.0490949	1.33063
IPI00219688	PKP2	PKP2{plakophilin 2 [Source:HGNC Symbol,Acc:9024]}	ENSG00000057294	NP_001005242	Isoform 1 of Plakophilin-2;Isoform 2 of Plakophilin-2;Truncated plakophilin-2	0.0293663	1.21893
IPI00335771	EXPH5	EXPH5{exophilin 5 [Source:HGNC Symbol,Acc:30578]}	ENSG00000110723	NP_055880	Isoform 1 of Exophilin-5;Isoform 2 of Exophilin-5;Uncharacterized protein;Uncharacterized protein;cDNA FLJ58666, highly similar to Slp homolog lacking C2 domains b;Uncharacterized protein	0.0293427	1.29565
IPI00010948	TRIM26	TRIM26{tripartite motif containing 26 [Source:HGNC Symbol,Acc:12962]}	ENSG00000137313;ENSG00000226060;ENSG00000228881;ENSG00000230230;ENSG00000231002;ENSG00000231641;ENSG00000234046;ENSG00000234127	NP_003440	Tripartite motif-containing protein 26;Tripartite motif-containing 26;Tripartite motif-containing 26	0.0225401	1.24541
IPI00003102	CNTFR	CNTFR{ciliary neurotrophic factor receptor [Source:HGNC Symbol,Acc:2170]}	ENSG00000122756	NP_001833;NP_671693	Ciliary neurotrophic factor receptor subunit alpha;Ciliary neurotrophic factor receptor	0.0434875	-1.24219
IPI00289649	PTPN3	PTPN3{protein tyrosine phosphatase, non-receptor type 3 [Source:HGNC Symbol,Acc:9655]}	ENSG00000070159	NP_001138841;NP_001138843;NP_002820;NP_001138840;NP_001138842;NP_001138844	Tyrosine-protein phosphatase non-receptor type 3;tyrosine-protein phosphatase non-receptor type 3 isoform 2;Uncharacterized protein	0.0490519	1.33565
IPI00002525	NENF	NENF{neuron derived neurotrophic factor [Source:HGNC Symbol,Acc:30384]}	ENSG00000117691	NP_037481	Neudesin	0.0399248	1.3744
IPI00386448	RELA	RELA{v-rel reticuloendotheliosis viral oncogene homolog A (avian) [Source:HGNC Symbol,Acc:9955]}	ENSG00000173039	NP_068810;NP_001138610	Isoform 1 of Transcription factor p65;Isoform 4 of Transcription factor p65;Isoform 3 of Transcription factor p65;Isoform 2 of Transcription factor p65;cDNA FLJ57698, highly similar to Transcription factor p65;RELA protein;RELA protein;Uncharacterized prot	0.0283682	1.21763
IPI00639805	GSTM2	GSTM2{glutathione S-transferase mu 2 (muscle) [Source:HGNC Symbol,Acc:4634]}	ENSG00000213366	NP_001135840	26 kDa protein;Uncharacterized protein;glutathione S-transferase Mu 2 isoform 2;Uncharacterized protein;Uncharacterized protein	0.00221217	-1.98804
IPI00178072	SPECC1L	SPECC1L{sperm antigen with calponin homology and coiled-coil domains 1-like [Source:HGNC Symbol,Acc:29022]}	ENSG00000100014	NP_001138940;NP_056145	Cytospin-A;120 kDa protein;KIAA0376 protein variant;Uncharacterized protein	0.0332946	1.32519
IPI00003985	BCS1L	BCS1L{BCS1-like (S. cerevisiae) [Source:HGNC Symbol,Acc:1020]}	ENSG00000074582	NP_001073335;NP_004319	Mitochondrial chaperone BCS1;Uncharacterized protein;Uncharacterized protein	0.00323912	3.05419
IPI00955011	CUL7	CUL7{cullin 7 [Source:HGNC Symbol,Acc:21024]}	ENSG00000044090	NP_001161842;NP_055595	cullin-7 isoform 1;Cullin-7	0.0410927	-1.62835
IPI00643365	ALG11	ALG11{asparagine-linked glycosylation 11, alpha-1,2-mannosyltransferase homolog (yeast) [Source:HGNC Symbol,Acc:32456]}	ENSG00000253710	NP_001004127	Asparagine-linked glycosylation protein 11 homolog	0.0467235	1.24588
IPI00010400	PLCB3	PLCB3{phospholipase C, beta 3 (phosphatidylinositol-specific) [Source:HGNC Symbol,Acc:9056]}	ENSG00000149782	NP_000923;NP_001171812	1-phosphatidylinositol-4,5-bisphosphate phosphodiesterase beta-3;1-phosphatidylinositol-4,5-bisphosphate phosphodiesterase beta-3 isoform 2	0.0383149	-1.2001
IPI00409758	PLEKHH2	PLEKHH2{pleckstrin homology domain containing, family H (with MyTH4 domain) member 2 [Source:HGNC Symbol,Acc:30506]}	ENSG00000152527	NP_742066	Isoform 1 of Pleckstrin homology domain-containing family H member 2;Isoform 3 of Pleckstrin homology domain-containing family H member 2	0.0487805	-1.32245
IPI00032038	CPT1A	CPT1A{carnitine palmitoyltransferase 1A (liver) [Source:HGNC Symbol,Acc:2328]}	ENSG00000110090	NP_001867;NP_001027017	Isoform 1 of Carnitine O-palmitoyltransferase 1, liver isoform;Isoform 2 of Carnitine O-palmitoyltransferase 1, liver isoform	0.0365696	-1.23036
IPI00013862	DTYMK	DTYMK{deoxythymidylate kinase (thymidylate kinase) [Source:HGNC Symbol,Acc:3061]}	ENSG00000168393	NP_036277	Thymidylate kinase;thymidylate kinase isoform 2;Protein	0.00470231	-1.35053
IPI00170934	STK11IP	STK11IP{serine/threonine kinase 11 interacting protein [Source:HGNC Symbol,Acc:19184]}	ENSG00000144589	NP_443134	Isoform 1 of Serine/threonine-protein kinase 11-interacting protein;Isoform 2 of Serine/threonine-protein kinase 11-interacting protein;cDNA FLJ61412, highly similar to Homo sapiens serine/threonine kinase 11 interacting protein (STK11IP), mRNA;71 kDa prot	0.0497899	-1.2518
IPI00607685	NUDT4	NUDT4{nudix (nucleoside diphosphate linked moiety X)-type motif 4 [Source:HGNC Symbol,Acc:8051]}	ENSG00000173598	NP_061967	Isoform 1 of Diphosphoinositol polyphosphate phosphohydrolase 2	0.0223572	-1.38885
IPI00796337	PCBP2	PCBP2{poly(rC) binding protein 2 [Source:HGNC Symbol,Acc:8648]}	ENSG00000197111	NP_005007;NP_001122383;NP_114366;NP_001122384;NP_001122385;NP_001092090	poly(rC)-binding protein 2 isoform a;Poly(rC)-binding protein 2;poly(rC)-binding protein 2 isoform b;poly(rC)-binding protein 2 isoform e;poly(rC)-binding protein 2 isoform f;poly(rC)-binding protein 2 isoform c;cDNA FLJ58339, highly similar to Poly(rC)-bi	0.0252273	-1.29845
IPI00219301	MARCKS	MARCKS{myristoylated alanine-rich protein kinase C substrate [Source:HGNC Symbol,Acc:6759]}	ENSG00000155130	NP_002347	Myristoylated alanine-rich C-kinase substrate	0.0249733	-1.26248
IPI00413362	SIPA1L1	SIPA1L1{signal-induced proliferation-associated 1 like 1 [Source:HGNC Symbol,Acc:20284]}	ENSG00000197555	NP_056371	Isoform 1 of Signal-induced proliferation-associated 1-like protein 1;Isoform 2 of Signal-induced proliferation-associated 1-like protein 1;139 kDa protein	0.00803961	-1.22377
IPI00549566	RARS2	RARS2{arginyl-tRNA synthetase 2, mitochondrial [Source:HGNC Symbol,Acc:21406]}	ENSG00000146282	NP_064716	Probable arginyl-tRNA synthetase, mitochondrial;Arginyl-tRNA synthetase 2, mitochondrial	0.0195713	-1.43864
IPI00640525	CTSA	CTSA{cathepsin A [Source:HGNC Symbol,Acc:9251]}	ENSG00000064601	NP_000299;NP_001121167;NP_001161066	lysosomal protective protein isoform a precursor;lysosomal protective protein isoform c precursor;Lysosomal protective protein	0.0147332	-1.31412
IPI00029723	FSTL1	FSTL1{follistatin-like 1 [Source:HGNC Symbol,Acc:3972]}	ENSG00000163430	NP_009016	Follistatin-related protein 1;cDNA FLJ50214, highly similar to Follistatin-related protein 1;cDNA FLJ52277, highly similar to Follistatin-related protein 1	0.0199634	-1.29099
IPI00016255	PLBD1	PLBD1{phospholipase B domain containing 1 [Source:HGNC Symbol,Acc:26215]}	ENSG00000121316	NP_079105	Phospholipase B-like 1	0.033019	-1.31792
IPI00980491	TRAPPC4	TRAPPC4{trafficking protein particle complex 4 [Source:HGNC Symbol,Acc:19943]}	ENSG00000196655	NP_057230	Uncharacterized protein;Trafficking protein particle complex subunit 4;Uncharacterized protein;cDNA FLJ55104, moderately similar to Trafficking protein particle complex subunit4;Uncharacterized protein;cDNA FLJ53004, highly similar to Trafficking protein p	0.00500952	1.28748
IPI00028376	TIMM8A	TIMM8A{translocase of inner mitochondrial membrane 8 homolog A (yeast) [Source:HGNC Symbol,Acc:11817]}	ENSG00000126953	NP_001139423;NP_004076	Mitochondrial import inner membrane translocase subunit Tim8 A	0.0064473	-1.37139
IPI00027445	HARS2	HARS2{histidyl-tRNA synthetase 2, mitochondrial (putative) [Source:HGNC Symbol,Acc:4817]}	ENSG00000112855	NP_036340	Probable histidyl-tRNA synthetase, mitochondrial;cDNA FLJ50406, highly similar to Histidyl-tRNA synthetase homolog;Uncharacterized protein;Uncharacterized protein;Uncharacterized protein;Uncharacterized protein;cDNA FLJ50611, highly similar to Histidyl-tRN	0.0495201	-1.22521
IPI00784044	MCCC2	MCCC2{methylcrotonoyl-CoA carboxylase 2 (beta) [Source:HGNC Symbol,Acc:6937]}	ENSG00000131844	NP_071415	Isoform 1 of Methylcrotonoyl-CoA carboxylase beta chain, mitochondrial;Isoform 2 of Methylcrotonoyl-CoA carboxylase beta chain, mitochondrial;Uncharacterized protein	0.0209122	-1.4092
IPI00424460	ZFYVE16	ZFYVE16{zinc finger, FYVE domain containing 16 [Source:HGNC Symbol,Acc:20756]}	ENSG00000039319	NP_001098721;NP_055548	Isoform 1 of Zinc finger FYVE domain-containing protein 16	0.00147429	-1.27274
IPI00029665	MMAB	MMAB{methylmalonic aciduria (cobalamin deficiency) cblB type [Source:HGNC Symbol,Acc:19331]}	ENSG00000139428	NP_443077	Cob(I)yrinic acid a,c-diamide adenosyltransferase, mitochondrial;19 kDa protein;18 kDa protein;18 kDa protein	0.0171929	-1.36414
IPI00946714	ATP6V1F	ATP6V1F{ATPase, H+ transporting, lysosomal 14kDa, V1 subunit F [Source:HGNC Symbol,Acc:16832]}	ENSG00000128524	NP_001185838;NP_004222	V-type proton ATPase subunit F isoform 2;V-type proton ATPase subunit F;v-type proton ATPase subunit F-like, partial	0.0172502	-1.43216
IPI00010800	NES	NES{nestin [Source:HGNC Symbol,Acc:7756]}	ENSG00000132688	NP_006608	Nestin	0.0278519	-1.54393
IPI00291695	GPX8	GPX8{glutathione peroxidase 8 (putative) [Source:HGNC Symbol,Acc:33100]}	ENSG00000164294	NP_001008398	Probable glutathione peroxidase 8;Glutathione peroxidase	0.0454916	-1.41477
IPI00015805	RASIP1	RASIP1{Ras interacting protein 1 [Source:HGNC Symbol,Acc:24716]}	ENSG00000105538	NP_060275	Ras-interacting protein 1	0.0432876	-1.53531
IPI00438923	CRYZL1	CRYZL1{crystallin, zeta (quinone reductase)-like 1 [Source:HGNC Symbol,Acc:2420]}	ENSG00000205758	NP_665857	Quinone oxidoreductase-like protein 1;Uncharacterized protein;Uncharacterized protein;Uncharacterized protein;Protein;cDNA FLJ33042 fis, clone THYMU2000436, highly similar to Quinone oxidoreductase-like 1;20 kDa protein;Uncharacterized protein;Uncharacteri	0.0316358	-1.35592
IPI00435932	SLC30A2	SLC30A2{solute carrier family 30 (zinc transporter), member 2 [Source:HGNC Symbol,Acc:11013]}	ENSG00000158014	NP_001004434	Isoform 2 of Zinc transporter 2;Uncharacterized protein;Isoform 1 of Zinc transporter 2	0.0318766	-1.56683
IPI00332106	PBXIP1	PBXIP1{pre-B-cell leukemia homeobox interacting protein 1 [Source:HGNC Symbol,Acc:21199]}	ENSG00000163346	NP_065385	Isoform 1 of Pre-B-cell leukemia transcription factor-interacting protein 1;Isoform 2 of Pre-B-cell leukemia transcription factor-interacting protein 1;Isoform 3 of Pre-B-cell leukemia transcription factor-interacting protein 1;cDNA FLJ58464, highly simila	0.0131611	-5.12596
IPI00792422	FAM21A;FAM21C;FAM21B	FAM21A{family with sequence similarity 21, member A [Source:HGNC Symbol,Acc:23416]};FAM21C{family with sequence similarity 21, member C [Source:HGNC Symbol,Acc:23414]};FAM21B{family with sequence similarity 21, member B [Source:HGNC Symbol,Acc:23417]}	ENSG00000099290;ENSG00000172661;ENSG00000152726	NP_001005751;NP_056077;NP_001162577;NP_060702;NP_001162578	Isoform 1 of WASH complex subunit FAM21A;147 kDa protein;cDNA FLJ77522;Isoform 4 of WASH complex subunit FAM21C;Isoform 2 of WASH complex subunit FAM21A;Isoform 1 of WASH complex subunit FAM21C;Isoform 2 of WASH complex subunit FAM21C;cDNA FLJ59326, highly	0.0383423	-14.1246
